# Supplementary material for: Ubiquitination drives COPI priming and Golgi SNARE localization
Source: eLife journal article supplement (doi:10.7554/elife.80911), 2022-07-29
Supplement: data1 [file Figure 1 Source Data 1.xlsx]

## Sheet: Sheet1
% Tube and Ring structures in WT or B'COP-D2-304 cells
% puncta	% Tube and Ring	% puncta	% Tube and Ring	% puncta	% Tube and Ring	% puncta	% Tube and Ring	% puncta	% Tube and Ring	% puncta	% Tube and Ring	% puncta	% Tube and Ring	% puncta	% Tube and Ring
WT Bet1		D2-304 Bet1		WT Gos1		D2-304 Gos1		WT Snc1		D2-304 Snc1		WT Snc2		D2-304 Snc2
100	0	68.75	31.25	75	25	40	60	71.4286	28.5714	100	0	100	0	40	60
100	0	90.9091	9.09091	85.7143	14.2857	60	40	100	0	87.5	12.5	100	0	25	75
100	0	88.2353	11.7647	73.6842	26.3158	57.1429	42.8571	62.5	37.5	60	40	100	0	40	60
94.7368	5.26316	84.6154	15.3846	81.8182	18.1818	50	50	90	10	44.4444	55.5556	100	0	0	100
100	0	81.8182	18.1818	81.8182	18.1818	100	0	100	0	50	50	100	0	40	60
100	0	77.7778	22.2222	44.4444	55.5556	50	50	100	0	75	25	100	0	66.6667	33.3333
100	0	90	10	100	0	100	0	100	0	37.5	62.5	100	0	75	25
100	0	92.3077	7.69231	100	0	50	50	100	0	50	50	100	0	40	60
88.6364	11.3636	84.6154	15.3846	45.4545	54.5455	75	25	100	0	71.4286	28.5714	100	0	66.6667	33.3333
100	0	75	25	90.9091	9.09091	100	0	83.3333	16.6667	77.7778	22.2222	100	0	42.8571	57.1429
86.6667	13.3333	57.1429	42.8571	92.8571	7.14286	100	0	62.5	37.5	57.1429	42.8571	100	0	55.5556	44.4444
100	0	75	25	80	20	57.1429	42.8571	100	0	100	0	100	0	60	40
100	0	50	50	100	0	50	50	78.9474	21.0526	75	25	100	0	66.6667	33.3333
97.619	2.38095	100	0	100	0	50	50	100	0	50	50	71.4286	28.5714	88.8889	11.1111
100	0	100	0	100	0	60	40	100	0	60	40	100	0	54.5455	45.4545
100	0	50	50	75	25	0	100	100	0	33.3333	66.6667	80	20	44.4444	55.5556
100	0	61.5385	38.4615	100	0	100	0	100	0	100	0	92.3077	7.69231	33.3333	66.6667
100	0	80	20	75	25	60	40	100	0	60	40	95	5	42.8571	57.1429
100	0	100	0	70	30	100	0	100	0	66.6667	33.3333	100	0	75	25
89.1892	10.8108	100	0	88.8889	11.1111	57.1429	42.8571	100	0	100	0	100	0	71.4286	28.5714
90	10	66.6667	33.3333	85.7143	14.2857	71.4286	28.5714	100	0	100	0	92.3077	7.69231	44.4444	55.5556
96	4	90.9091	9.09091	75	25	75	25	100	0	75	25	83.3333	16.6667	55.5556	44.4444
75	25	80	20	81.8182	18.1818	20	80	100	0	20	80	93.3333	6.66667	50	50
100	0	63.6364	36.3636	100	0	100	0	100	0	66.6667	33.3333	91.6667	8.33333	60	40
57.1429	42.8571	30	70	100	0	66.6667	33.3333	100	0	87.5	12.5	100	0	50	50
66.6667	33.3333	50	50	100	0	100	0	100	0	0	100	100	0	0	100
72.7273	27.2727	45.4545	54.5455	85.7143	14.2857	100	0	100	0	50	50	100	0	66.6667	33.3333
88.2353	11.7647	69.2308	30.7692	86.6667	13.3333	50	50	100	0	40	60	100	0	66.6667	33.3333
100	0	50	50	81.8182	18.1818	100	0	100	0	50	50	100	0	33.3333	66.6667
100	0	70	30	75	25	100	0	100	0	100	0	100	0	0	100
100	0	57.1429	42.8571	100	0	25	75	100	0	100	0	100	0	75	25
89.5	10.5	100	0	80	20	80	20	100	0	60	40	83.3333	16.6667	16.6667	83.3333
66.67	33.33	100	0	83.3333	16.6667	100	0	100	0	100	0	100	0	50	50
100	0	95	5	80	20	100	0	100	0	20	80	100	0	60	40
100	0	33.3333	66.6667	100	0	25	75	100	0	50	50	83.3333	16.6667	0	100
75	25	40	60	100	0	100	0	100	0	57.1429	42.8571	83.3333	16.6667	0	100
100	0	66.6667	33.3333	100	0	66.6667	33.3333	100	0	60	40	100	0	66.6667	33.3333
100	0	50	50	100	0	62.5	37.5	100	0	75	25	100	0	87.5	12.5
100	0	42.8571	57.1429	100	0	100	0	100	0	25	75	81.8182	18.1818	50	50
90	10	57.1429	42.8571	100	0	100	0	100	0	100	0	100	0	0	100
100	0	0	100	88.8889	11.1111	100	0	100	0	66.6667	33.3333	100	0	100	0
100	0	50	50	88.8889	11.1111	100	0	100	0	50	50	100	0	100	0
100	0	25	75	100	0	0	100	100	0			90	10	44.4444	55.5556
100	0	57.1429	42.8571	72.7273	27.2727	100	0	86.6667	13.3333			100	0	0	100
83.111	16.889	77.7778	22.2222	84.6154	15.3846	45.4545	54.5455					100	0	71.4286	28.5714
100	0	42.8571	57.1429	57.1429	42.8571	100	0					100	0	60	40
100	0	66.6667	33.3333	70	30	50	50					100	0
100	0	40	60	58.8235	41.1765	100	0					80	20
		88.8889	11.1111	38.4615	61.5385	33.3333	66.6667
		43.75	56.25	50	50	100	0
		69.2308	30.7692	85.7143	14.2857	37.5	62.5
		92.8571	7.14286	87.5	12.5	100	0
		33.3333	66.6667	75	25	25	75
		92.3077	7.69231	100	0
		66.6667	33.3333	50	50
		45.4545	54.5455	80	20
		58.3333	41.6667	100	0
		57.1429	42.8571	100	0
		80	20	100	0
		66.6667	33.3333	90	10
		55.5556	44.4444	100	0
		66.6667	33.3333	72.7273	27.2727
		69.1057	30.8943
		66.8072	33.1928
		72.2612	27.7388
