# Supplementary material for: Ubiquitination drives COPI priming and Golgi SNARE localization
Source: eLife journal article supplement (doi:10.7554/elife.80911), 2022-07-29
Supplement: data1 [file Figure 3 Source Data 1.xlsx]

## Sheet: Sheet1
% ring and tubular structures in WT or DUB fusion constructs or tsCOPI mutants
% puntae	% ring + tubular	% puntae	% ring + tubular	% puntae	% ring + tubular	% puntae	% ring + tubular	% puntae	% ring + tubular	% puntae	% ring + tubular	% puntae	% ring + tubular	% puntae	% ring + tubular	% puntae	% ring + tubular	% puntae	% ring + tubular	% puntae	% ring + tubular	% puntae	% ring + tubular	% puntae	% ring + tubular	% puntae	% ring + tubular	% puntae	% ring + tubular	% puntae	% ring + tubular	% puntae	% ring + tubular	% puntae	% ring + tubular
WT Bet1		Δ2-304 Bet1		DOA1 Bet1		ret1-20c Bet1		ret1-37c Bet1		NZF Bet1		wt Snc1		304 Snc1		DOA1 Snc1		NZF Snc1		cop1 ts 20c Snc1		cop1 ts 37c Snc1		WT Gos1		Δ2-304 Gos1		UBDDoa1 Gos1		NZFTab2 Gos1		20 °C Gos1		37 °C Gos1
100	0	100	0	100	0	100	0	50	50	100	0	100	0	100	0	100	0	100	0	100	0	66.67	33.33	100	0	70	30	60	40	60	40	66.6667	33.3333	33.3333	66.6667
88.89	11.11	70	30	80	20	83.33	16.67	50	50	100	0	100	0	100	0	100	0	85.71	14.29	100	0	100	0	100	0	100	0	75	25	33.3333	66.6667	71.4286	28.5714	50	50
100	0	83.33	16.67	100	0	100	0	50	50	71.43	28.57	100	0	85.71	14.29	100	0	100	0	75	25	40	60	83.3333	16.6667	66.6667	33.3333	100	0	100	0	100	0	50	50
100	0	100	0	100	0	100	0	85.71	14.29	100	0	100	0	77.78	22.22	100	0	100	0	100	0	66.67	33.33	100	0	100	0	75	25	100	0	100	0	80	20
100	0	100	0	100	0	83.33	16.67	83.33	16.67	77.78	22.22	100	0	72.73	27.27	100	0	71.43	28.57	100	0	100	0	100	0	50	50	100	0	66.6667	33.3333	100	0	20	80
100	0	40	60	100	0	83.33	16.67	100	0	70	30	100	0	57.14	42.86	100	0	87.5	12.5	100	0	85.71	14.29	80	20	60	40	100	0	50	50	100	0	60	40
100	0	75	25	90	10	100	0	100	0	72.73	27.27	100	0	100	0	100	0	100	0	100	0	100	0	100	0	75	25	90	10	80	20	100	0	75	25
100	0	87.5	12.5	100	0	100	0	75	25	87.5	12.5	100	0	100	0	100	0	100	0	100	0	100	0	100	0	50	50	100	0	100	0	100	0	100	0
100	0	80	20	100	0	100	0	100	0	66.67	33.33	100	0	100	0	100	0	100	0	100	0	66.67	33.33	100	0	40	60	100	0	20	80	100	0	66.6667	33.3333
100	0	50	50	100	0	83.33	16.67	71.43	28.57	87.5	12.5	100	0	88.89	11.11	100	0	100	0	100	0	100	0	100	0	50	50	90	10	100	0	100	0	50	50
100	0	100	0	100	0	100	0	60	40	88.89	11.11	100	0	100	0	100	0	100	0	100	0	75	25	100	0	75	25	100	0	40	60	75	25	33.3333	66.6667
100	0	60	40	100	0	100	0	60	40	50	50	100	0	100	0	100	0	100	0	100	0	85.71	14.29	75	25	60	40	100	0	40	60	83.3333	16.6667	40	60
100	0	85.71	14.29	100	0	100	0	80	20	71.43	28.57	100	0	80	20	100	0	75	25	100	0	83.33	16.67	100	0	0	100	100	0	60	40	80	20	75	25
100	0	71.43	28.57	100	0	100	0	100	0	63.64	36.36	100	0	66.67	33.33	100	0	62.5	37.5	100	0	66.67	33.33	66.6667	33.3333	100	0	83.3333	16.6667	75	25	100	0	50	50
100	0	80	20	100	0	100	0	75	25	57.14	42.86	100	0	66.67	33.33	100	0	100	0	100	0	83.33	16.67	100	0	83.3333	16.6667	80	20	100	0	100	0	100	0
100	0	100	0	100	0	80	20	100	0	66.67	33.33	100	0	66.67	33.33	100	0	90	10	100	0	40	60	100	0	33.3333	66.6667	100	0	80	20	100	0	33.3333	66.6667
100	0	100	0	100	0	100	0	85.71	14.29	57.14	42.86	100	0	70	30	100	0	100	0	100	0	50	50	100	0	50	50	100	0	50	50	100	0	50	50
100	0	66.67	33.33	100	0	100	0	85.71	14.29	100	0	100	0	57.14	42.86	100	0	100	0	100	0	100	0	100	0	70	30	100	0	33.3333	66.6667	100	0	50	50
100	0	66.67	33.33	100	0	100	0	80	20	60	40	100	0	50	50	100	0	100	0	100	0	100	0	100	0	66.6667	33.3333	100	0	60	40	100	0	80	20
100	0	85.71	14.29	90	10	100	0	33.33	66.67	75	25	100	0	66.67	33.33	100	0	100	0	100	0	77.78	22.22	100	0	100	0	100	0	100	0	100	0	20	80
100	0	83.33	16.67	100	0	100	0	40	60	100	0	100	0	60	40	100	0	100	0	100	0	66.67	33.33	100	0	70	30	100	0	50	50	100	0	60	40
100	0	100	0	100	0	85.71	14.29	100	0	87.5	12.5	100	0	100	0	100	0	100	0	100	0	83.33	16.67	100	0	100	0	100	0	60	40	100	0	75	25
100	0	16.67	83.33	100	0	100	0	83.33	16.67	75	25	100	0	100	0	100	0	100	0	100	0	85.71	14.29	100	0	50	50	100	0	30	70	100	0	100	0
100	0	50	50	100	0	100	0	66.67	33.33	57.14	42.86	100	0	100	0	100	0	100	0	71.43	28.57	72.73	27.27	100	0	66.6667	33.3333	100	0	40	60	100	0	66.6667	33.3333
100	0	0	100	100	0	100	0	100	0	85.71	14.29	100	0	60	40	100	0	100	0	100	0	60	40	100	0	75	25	100	0	100	0	100	0	50	50
100	0	50	50	100	0	100	0	66.67	33.33	100	0	100	0	50	50	100	0	75	25	100	0	75	25	100	0	80	20	75	25	70	30	100	0	33.3333	66.6667
100	0	50	50	100	0	85.71	14.29	83.33	16.67	57.14	42.86	100	0	60	40	100	0	70	30	100	0	66.67	33.33	100	0	40	60	100	0	67	33	100	0	40	60
100	0	20	80	100	0	100	0	40	60	66.67	33.33	100	0	60	40	100	0	100	0	100	0	50	50	100	0	50	50	100	0	70	30	100	0	75	25
83.33	16.67	0	100	100	0	100	0	66.67	33.33	62.5	37.5	100	0	75	25	100	0	80	20	100	0	60	40	100	0	75	25	80	20	40	60	100	0	50	50
100	0	40	60	80	20	100	0	66.67	33.33	87.5	12.5	100	0	100	0	100	0	100	0	100	0	37.5	62.5	100	0	60	40	95	5	80	20	100	0	100	0
87.5	12.5	100	0	100	0	100	0	71.43	28.57	55.56	44.44	100	0	50	50	100	0	100	0	100	0	71.43	28.57	100	0	0	100	100	0	34	66	100	0	40	60
100	0	80	20	100	0	100	0	42.86	57.14	66.67	33.33	100	0	80	20	100	0	100	0	100	0	100	0	100	0	100	0	90	10	50	50	100	0	75	25
100	0	77.78	22.22	100	0	100	0	50	50	66.67	33.33	100	0	100	0	100	0	87.5	12.5	100	0	88.89	11.11	100	0	83.3333	16.6667	100	0	50	50	100	0	66.6667	33.3333
100	0	50	50	100	0	100	0	42.86	57.14	62.5	37.5	100	0	100	0	100	0	87.5	12.5	83.33	16.67	77.78	22.22	100	0	30	70	100	0	100	0	100	0	80	20
75	25	75	25	100	0	100	0	50	50	100	0	100	0	100	0	100	0	100	0	100	0	76.92	23.08	100	0	50	50	100	0	80	20	100	0	33.3333	66.6667
100	0	50	50	80	20	57.14	42.86	66.67	33.33	33.33	66.67	100	0	80	20	100	0	100	0	100	0	66.67	33.33	100	0	40	60	85	15	60	40	100	0	80	20
100	0	60	40	100	0	100	0	50	50	62.5	37.5	100	0	100	0	100	0	100	0	100	0	50	50	100	0	50	50	80	20	33.3333	66.6667	100	0	66.6667	33.3333
50	50	33.33	66.67	87.5	12.5	100	0	80	20	75	25	100	0	100	0	100	0	100	0	100	0	80	20	100	0	40	60	100	0	83.3333	16.6667	100	0	100	0
100	0	33.33	66.67	100	0	100	0	60	40	50	50	100	0	100	0	100	0	100	0	100	0	100	0	100	0	80	20	100	0	50	50	100	0	80	20
88.89	11.11	100	0	100	0	100	0	100	0	80	20	100	0	100	0	100	0	90.91	9.09	100	0	100	0	100	0	75	25	100	0	70	30	100	0	40	60
100	0	25	75	100	0	100	0	37.5	62.5	85.71	14.29	100	0	100	0	100	0	100	0	100	0	100	0	100	0	60	40	95	5	70	30	100	0	50	50
100	0	50	50	87.5	12.5	100	0	57.14	42.86	60	40	100	0	66.67	33.33	100	0	100	0	100	0	71.43	28.57	100	0	0	100	100	0	71.4286	28.5714	100	0	85.7143	14.2857
100	0	42.86	57.14	100	0	100	0	66.67	33.33	57.14	42.86	100	0	85.71	14.29	100	0	100	0	100	0	100	0	100	0	100	0	100	0	80	20	100	0	30	70
100	0	50	50	100	0	75	25	100	0	100	0	100	0	80	20	100	0	90	10	100	0	50	50	100	0	25	75	50	50	50	50	100	0	20	80
100	0	60	40	100	0	83.33	16.67	85.71	14.29	83.33	16.67	100	0	66.67	33.33	100	0	100	0	100	0	75	25	100	0	66.6667	33.3333	100	0	60	40	100	0	0	100
100	0	100	0	100	0	100	0	100	0	62.5	37.5	100	0	50	50	100	0	100	0	100	0	71.43	28.57	100	0	100	0	100	0	33.3333	66.6667	100	0	50	50
100	0	60	40	100	0	100	0	50	50	71.43	28.57	100	0	71.43	28.57	100	0			100	0	40	60	100	0	66.6667	33.3333	100	0	60	40	90	10	80	20
100	0	42.86	57.14	100	0	100	0	71.43	28.57	72.73	27.27	100	0	83.33	16.67	100	0			100	0	100	0	90	10	100	0	100	0	100	0	100	0	40	60
100	0	100	0	100	0	85.71	14.29	50	50	71.43	28.57	100	0	33.33	66.67	100	0			100	0	57.14	42.86	100	0	50	50	83.3333	16.6667	66.6667	33.3333	100	0	50	50
80	20	0	100	100	0	85.71	14.29	66.67	33.33	83.33	16.67	100	0	50	50	100	0			100	0	100	0	100	0	66.6667	33.3333	66.6667	33.3333	50	50	90	10	80	20
		70	30	100	0	100	0	83.33	16.67	85.71	14.29			33.33	66.67					100	0	77.78	22.22	80	20	75	25	75	25	34	66	95	5	50	50
		25	75	80	20	85.71	14.29	100	0	50	50			80	20					100	0	66.67	33.33	100	0	50	50	75	25	67	33	90	10	40	60
		50	50	100	0	100	0	80	20	70	30			40	60					100	0	80	20	100	0	40	60	100	0	100	0	100	0	60	40
		33.33	66.67	100	0	100	0	66.67	33.33	63.64	36.36			80	20					100	0			100	0	50	50	85.7143	14.2857	100	0	100	0	67	33
		50	50	100	0	100	0	80	20	44.44	55.56			66.67	33.33					100	0			100	0	75	25	100	0	80	20	100	0	50	50
		66.67	33.33	100	0	100	0	71.43	28.57	71.43	28.57			80	20					80	20			100	0	60	40	100	0	100	0	80	20	40	60
		75	25	100	0	100	0	100	0	77.78	22.22			100	0					100	0			75	25	0	100	100	0	100	0	100	0	80	20
		25	75			100	0	50	50	62.5	37.5			57.14	42.86									100	0	100	0	100	0	75	25	100	0	90	10
		40	60			87.5	12.5	100	0	81.82	18.18			42.86	57.14									66.67	33.33	83.3333	16.6667	83.3333	16.6667	100	0	80	20	100	0
		40	60			100	0	50	50	69.23	30.77			100	0									100	0	33.3333	66.6667	85	15	80	20	100	0	60	40
		66.67	33.33			100	0	71.43	28.57	75	25			100	0									100	0	50	50	90	10	80	20	100	0	40	60
		66.67	33.33			100	0	85.71	14.29	71.43	28.57			100	0									100	0	40	60	100	0	30	70	100	0	20	80
		100	0			100	0	40	60	61.54	38.46			66.67	33.33									100	0	66.6667	33.3333	100	0	20	80	100	0	0	100
		50	50			100	0	33.33	66.67	73.33	26.67			50	50									100	0	100	0	85.7143	14.2857	50	50	90	10	66.6667	33.3333
		20	80			100	0	60	40	50	50			62.5	37.5									100	0	66.6667	33.3333	100	0	50	50	100	0	100	0
		66.67	33.33			100	0	83.33	16.67	70	30			66.67	33.33									100	0	100	0	100	0	50	50	100	0	80	20
		66.67	33.33			100	0	62.5	37.5	60	40			70	30									100	0	50	50	100	0	100	0	100	0	40	60
		100	0			100	0	40	60	60	40			100	0									100	0	66.6667	33.3333	100	0	66.6667	33.3333	100	0	50	50
		57.14	42.86			100	0	75	25	55.56	44.44			100	0									100	0	75	25	83.3333	16.6667	100	0	100	0	85.7143	14.2857
		80	20			100	0	75	25	62.5	37.5			100	0									100	0	50	50	90	10	100	0	100	0	30	70
		71.43	28.57			92.86	7.14	80	20	57.14	42.86			60	40									100	0	40	60	75	25	50	50	100	0	20	80
		83.33	16.67			66.67	33.33	87.5	12.5	57.14	42.86													100	0	80	20	75	25	100	0	80	20	0	100
		81.82	18.18			100	0	66.67	33.33	44.44	55.56													100	0	75	25	100	0	20	80	100	0	50	50
		40	60			100	0	66.67	33.33	55.56	44.44													100	0	60	40	85.7143	14.2857	80	20	100	0	80	20
		66.67	33.33			100	0	100	0	42.86	57.14													100	0	0	100	100	0	70	30	100	0	40	60
		66.67	33.33			80	20	87.5	12.5	75	25													100	0	100	0	100	0	34	66	100	0	50	50
		100	0			100	0	100	0	61.54	38.46													100	0	83.3333	16.6667	100	0	75	25	100	0	80	20
		60	40			100	0	62.5	37.5	69.23	30.77													100	0	33.3333	66.6667	100	0	34	66	100	0	50	50
		60	40			100	0	80	20	66.67	33.33													100	0	50	50	83.3333	16.6667	80	20	100	0	40	60
		40	60			100	0	71.43	28.57	50	50													100	0	40	60	66.6667	33.3333	80	20	100	0	60	40
		0	100			100	0	71.43	28.57	66.67	33.33													100	0	50	50	90	10	33.3333	66.6667	100	0	67	33
		60	40			100	0	57.14	42.86	75	25													100	0	40	60	100	0	83.3333	16.6667	100	0	20	80
		50	50			100	0	80	20	50	50													100	0	80	20	95	5	60	40	100	0	60	40
		25	75			100	0	71.43	28.57	70	30													100	0	75	25	90	10	70	30	100	0	75	25
		33.33	66.67			75	25	100	0	71.43	28.57													100	0	60	40	100	0	75	25	100	0	100	0
		25	75			100	0	66.67	33.33	60	40													100	0	0	100	100	0	71.4286	28.5714	100	0	66.6667	33.3333
		100	0			100	0	80	20	63.64	36.36													100	0	100	0	100	0	80	20	100	0	50	50
		37.5	62.5			100	0	100	0	37.5	62.5													100	0	25	75	90	10	50	50	100	0	33.3333	66.6667
		20	80			100	0	75	25	63.64	36.36													100	0	80	20	80	20	80	20	100	0	40	60
		33.33	66.67			100	0	66.67	33.33	57.14	42.86													100	0	50	50	100	0	65	35	100	0	75	25
		22.22	77.78			100	0	100	0	63.64	36.36													100	0	60	40	100	0	34	66	100	0	50	50
		66.67	33.33			100	0	57.14	42.86	50	50													100	0	80	20	100	0	20	80	90	10	100	0
		33.33	66.67			100	0	100	0	80	20													100	0	70	30	67	33	50	50	100	0	67	33
		42.86	57.14			100	0	80	20	50	50													90	10	50	50	100	0	80	20	100	0	50	50
		40	60			100	0	85.71	14.29	66.67	33.33													100	0	40	60	100	0	70	30	90	10	40	60
		50	50			100	0	60	40															100	0	0	100	100	0	90	10	95	5	80	20
		50	50			100	0	75	25															90	10	40	60	95	5	100	0	90	10	90	10
