# Supplementary material for: Ubiquitination drives COPI priming and Golgi SNARE localization
Source: eLife journal article supplement (doi:10.7554/elife.80911), 2022-07-29
Supplement: data1 [file Figure 4 Source Data 1.xlsx]

## Sheet: Sheet1
Cell Size (uM)
B'COP-DUB	B'COP-DUB*	ACOP-DUB	ACOP-DUB*	WT
5.888	4.137	7.887	6.288	6.145
6.278	5.644	6.245	3.314	4.686
5.74	3.493	5.138	3.308	4.662
4.937	3.876	8.871	4.162	3.858
5.104	3.616	7.302	3.96	4.831
4.416	3.313	5.997	4.579	3.106
4.875	3.65	6.284	4.897	4.269
4.109	6.288	7.78	4.927	4.63
2.758	3.314	5.837	3.369	5.316
7.228	3.308	5.08	4.122	6.228
5.077	4.162	6.821	6.288	3.705
5.685	3.96	4.183	3.314	5.396
3.585	4.579	5.065	3.308	3.845
4.677	4.897	5.413	4.162	4.423
4.945	4.927	6.288	3.96	5.346
4.134	3.369	6.918	4.579	5.276
6.278	4.122	7.279	4.897	3.875
5.74	4.927	4.548	4.927	4.404
4.937	3.369	3.313	3.369	4.275
5.104	4.122	4.5	4.122	4.907
4.416	4.137	7.887	6.21	4.254
4.875	5.644	6.245	7.492	4.771
4.109	3.493	5.138	5.022	4.565
2.758	3.876	8.871	5.124	3.928
7.228	3.616	7.302	5.923	4.465
5.077	3.313	5.997	5.129	4.524
5.685	4.137	6.284	4.5	3.879
3.585	3.644	7.78	5.327	4.337
4.677	3.493	5.837	4.875	6.145
5.997	4.579	5.08	4.108	4.686
6.284	4.897	6.821	6.294	4.662
7.78	4.927	4.183	4.957	3.858
5.837	3.369	5.065	4.791	4.831
5.08	4.122	5.413	5.787	3.106
6.821	4.927	6.288	5.223	4.269
4.183	3.369	6.918	5.486	4.63
5.065	4.122	7.279	6.563	5.316
5.413	4.137	4.548	6.041	6.228
6.288	5.644	3.313	3.96	3.705
7.78	3.96	6.245	4.579	5.396
5.837	4.579	5.138	4.897	3.845
5.08	6.288	8.871	4.927	4.423
6.821	4.927	7.302	3.369	5.346
7.78	3.369	5.997	4.122	5.276
5.837	4.122	6.284	4.957	3.875
5.08	3.96	7.78	4.791	4.404
6.821	4.579	4.183	5.787	4.275
7.78	4.897	5.065	5.223	4.907
5.837	4.927	5.413	3.314	4.254
5.08	3.369	6.288	3.308	4.771
6.821	4.122		4.162	4.565
				3.928
				4.465
				4.524
				3.879
				4.337
