# Supplementary material for: Ubiquitination drives COPI priming and Golgi SNARE localization
Source: eLife journal article supplement (doi:10.7554/elife.80911), 2022-07-29
Supplement: data1 [file Figure 4 Source Data 2.xlsx]

## Sheet: Sheet1
% punctae	% ring + tubular	% punctae	% ring + tubular	% punctae	% ring + tubular	% punctae	% ring + tubular	% punctae	% ring + tubular	% punctae	% ring + tubular	% punctae	% ring + tubular	% punctae	% ring + tubular	% punctae	% ring + tubular	% punctae	% ring + tubular	% punctae
	WT Bet1		A DUB Bet1		A DUB* Bet1		B' DUB Bet1		B' DUB* Bet1			WT Gos1		A DUB Gos1		A DUB* Gos1		B' DUB Gos1		B' DUB* Gos1
100	0	0	100	75	25	66.6667	33.3333	60	40		66.6667	33.3333	0	100	100	0	33.3333	66.6667	60	40
100	0	33.3333	66.6667	75	25	100	0	33.3333	66.6667		71.4286	28.5714	0	100	66.6667	33.3333	50	50	75	25
83.3333	16.6667	66.6667	33.3333	100	0	66.6667	33.3333	100	0		100	0	0	100	80	20	50	50	100	0
100	0	12.5	87.5	100	0	100	0	100	0		100	0	25	75	100	0	80	20	75	25
100	0	66.6667	33.3333	100	0	50	50	66.6667	33.3333		100	0	25	75	80	20	20	80	100	0
80	20	50	50	100	0	66.6667	33.3333	100	0		100	0	100	0	50	50	60	40	100	0
100	0	28.5714	71.4286	100	0	75	25	100	0		100	0	80	20	75	25	75	25	80	20
100	0	100	0	100	0	50	50	100	0		100	0	25	75	100	0	100	0	100	0
100	0	40	60	83.3333	16.6667	40	60	100	0		100	0	25	75	100	0	66.6667	33.3333	100	0
100	0	42.8571	57.1429	66.6667	33.3333	50	50	100	0		100	0	40	60	100	0	50	50	75	25
100	0	66.6667	33.3333	75	25	75	25	80	20		75	25	66.6667	33.3333	30	70	33.3333	66.6667	100	0
75	25	66.6667	33.3333	75	25	60	40	100	0		83.3333	16.6667	0	100	100	0	40	60	100	0
100	0	100	0	100	0	0	100	100	0		80	20	66.6667	33.3333	100	0	75	25	100	0
66.6667	33.3333	75	25	85.7143	14.2857	100	0	75	25		100	0	0	100	100	0	50	50	83.3333	16.6667
100	0	100	0	100	0	83.3333	16.6667	100	0		100	0	0	100	100	0	100	0	80	20
100	0	100	0	100	0	33.3333	66.6667	80	20		100	0	50	50	100	0	33.3333	66.6667	100	0
100	0	66.6667	33.3333	100	0	50	50	80	20		100	0	66.6667	33.3333	50	50	50	50	100	0
100	0	50	50	100	0	40	60	33.3333	66.6667		100	0	50	50	100	0	50	50	100	0
100	0	100	0	83.3333	16.6667	66.6667	33.3333	83.3333	16.6667		100	0	83.3333	16.6667	100	0	80	20	100	0
100	0	66.6667	33.3333	66.6667	33.3333	100	0	100	0		100	0	20	80	66.6667	33.3333	20	80	100	0
100	0	0	100	75	25	66.6667	33.3333	100	0		100	0	100	0	60	40	60	40	100	0
100	0	33.3333	66.6667	75	25	100	0	100	0		100	0	25	75	100	0	75	25	33.3333	66.6667
100	0	66.6667	33.3333	100	0	50	50	100	0		100	0	80	20	71.4286	28.5714	100	0	60	40
100	0	12.5	87.5	85.7143	14.2857	66.6667	33.3333	66.6667	33.3333		100	0	50	50	100	0	66.6667	33.3333	75	25
100	0	66.6667	33.3333	100	0	75	25	100	0		100	0	100	0	100	0	50	50	100	0
100	0	50	50	100	0	50	50	100	0		100	0	100	0	66.6667	33.3333	33.3333	66.6667	75	25
100	0	28.5714	71.4286	100	0	40	60	100	0		100	0	25	75	80	20	40	60	100	0
100	0	100	0	100	0	50	50	100	0		100	0	25	75	100	0	75	25	100	0
100	0	40	60	83.3333	16.6667	75	25	100	0		100	0	100	0	80	20	50	50	80	20
100	0	42.8571	57.1429	66.6667	33.3333	60	40	80	20		100	0	80	20	50	50	100	0	100	0
100	0	66.6667	33.3333	75	25	0	100	100	0		100	0	25	75	75	25	40	60	100	0
100	0	66.6667	33.3333	75	25	100	0	100	0		100	0	0	100	100	0	75	25	75	25
100	0	100	0	100	0	83.3333	16.6667	75	25		100	0	66.6667	33.3333	100	0	66.6667	33.3333	100	0
100	0	75	25	85.7143	14.2857	33.3333	66.6667	100	0		100	0	0	100	100	0	80	20	100	0
100	0	100	0	100	0	50	50	80	20		100	0	0	100	30	70	33.3333	66.6667	100	0
100	0	100	0	100	0	40	60	80	20		100	0	50	50	100	0	80	20	83.3333	16.6667
100	0	66.6667	33.3333	100	0	50	50	33.3333	66.6667		100	0	100	0	100	0	66.6667	33.3333	80	20
100	0	50	50	100	0	40	60	83.3333	16.6667		100	0	25	75	100	0	100	0	100	0
100	0	100	0	83.3333	16.6667	50	50	100	0		100	0	80	20	100	0	80	20	100	0
100	0	66.6667	33.3333	66.6667	33.3333	75	25	100	0		100	0	50	50	100	0	40	60	100	0
100	0					60	40	75	25		100	0	100	0	50	50	50	50	100	0
100	0					0	100	71.4286	28.5714		100	0			100	0	85.7143	14.2857	100	0
100	0					100	0	80	20		100	0			100	0			100	0
100	0					25	75	50	50		100	0			66.6667	33.3333			33.3333	66.6667
100	0										100	0			60	40
															100	0
															71.4286	28.5714
															100	0
