# Supplementary material for: Ubiquitination drives COPI priming and Golgi SNARE localization
Source: eLife journal article supplement (doi:10.7554/elife.80911), 2022-07-29
Supplement: data1 [file Figure 5 Source Data 1.xlsx]

## Sheet: protein_groups
SILAC mass spectrometric analysis of Gos1-FLAG pulldown samples
Protein IDs	Majority protein IDs	Peptide counts (all)	Peptide counts (razor+unique)	Peptide counts (unique)	Fasta headers	Number of proteins	Peptides	Razor + unique peptides	Unique peptides	Sequence coverage [%]	Unique + razor sequence coverage [%]	Unique sequence coverage [%]	Mol. weight [kDa]	Sequence length	Sequence lengths	Q-value	Score	Ratio H/L	Ratio H/L normalized	Ratio H/L variability [%]	Ratio H/L count	Ratio H/L iso-count	Ratio H/L type	Intensity	Intensity L	Intensity H	Only identified by site	Reverse	Potential contaminant	id	Peptide IDs	Peptide is razor	Mod. peptide IDs	Evidence IDs	MS/MS IDs	Best MS/MS	GlyGly (K) site IDs	Oxidation (M) site IDs	Phospho (ST) site IDs	GlyGly (K) site positions	Oxidation (M) site positions	Phospho (ST) site positions
CON__P00761	CON__P00761	4	4	4		1	4	4	4	25.1	25.1	25.1	24.409	231	231	0	104.16	0.001685	0.002647	NaN	1	1	Median	7430000000	7410000000	11913000			#ERROR!	0	929;1220;1364;2284	True;True;True;True	952;953;1254;1402;2363	1220;1221;1601;1791;3004	1895;1896;2473;2768;4565;4566	1895;2473;2768;4566		0			94
CON__P02533;CON__Q6IFX2;CON__P19012;CON__A2A4G1;CON__Q04695;CON__Q9QWL7;CON__Q9Z2K1;CON__Q3ZAW8;CON__P08727;CON__P19001;CON__Q61782;CON__P35900;CON__Q9D312	CON__P02533;CON__Q6IFX2;CON__P19012;CON__A2A4G1;CON__Q04695;CON__Q9QWL7;CON__Q9Z2K1;CON__Q3ZAW8	8;5;5;5;4;4;4;4;3;3;1;1;1	1;1;0;0;0;0;0;0;0;0;0;0;0	1;1;0;0;0;0;0;0;0;0;0;0;0	;;;;;;;	13	8	1	1	18.4	4.4	4.4	51.621	472	472;452;456;456;432;433;469;474;400;403;93;424;431	0	15.537	NaN	NaN	NaN	0	0	Median	17794000	17794000	0			#ERROR!	1	111;172;748;1138;1171;2211;2364;2456	False;False;True;False;False;False;False;False	118;180;769;1170;1204;2288;2449;2543;2544	148;233;979;1498;1537;2912;3119;3243;3244;3245	240;371;1521;2311;2371;4428;4748;4923;4924;4925	240;371;1521;2311;2371;4428;4748;4925		1;2			119;272
CON__P02768-1	CON__P02768-1	1	1	1		1	1	1	1	1.6	1.6	1.6	69.366	609	609	0.002564	5.7798	0.01463	0.023336	NaN	1	1	Median	237000000	233000000	3774000			#ERROR!	2	1400	TRUE	1442	1836	2831	2831
CON__P02769	CON__P02769	1	1	1		1	1	1	1	2.1	2.1	2.1	69.293	607	607	0	10.787	0.34212	0.55219	NaN	1	1	Median	48879000	37868000	11011000			#ERROR!	3	1223	TRUE	1257	1605	2477	2477
CON__P04264	CON__P04264	21	19	11		1	21	19	11	34.2	31.1	21.4	66.017	644	644	0	284.93	0.02647	0.042262	142.77	18	18	Median	4150000000	4060000000	92869000			#ERROR!	4	354;372;620;706;756;882;1296;1337;1542;1545;1566;1692;1856;1857;1899;1915;1932;1944;2170;2187;2498	True;True;False;True;True;False;True;True;True;True;True;True;True;True;True;True;True;True;True;True;True	366;367;385;637;724;777;904;1332;1375;1597;1600;1622;1751;1920;1921;1964;1980;1997;2010;2246;2263;2587	470;471;472;494;819;927;988;1155;1156;1703;1759;1760;2026;2029;2030;2057;2058;2221;2443;2444;2496;2497;2521;2522;2540;2557;2859;2860;2879;3298	737;738;739;773;1273;1449;1534;1790;1791;2624;2721;2722;3113;3116;3117;3160;3161;3394;3719;3720;3797;3798;3835;3836;3863;3893;4360;4361;4386;5006	738;773;1273;1449;1534;1791;2624;2722;3113;3116;3160;3394;3719;3720;3798;3835;3863;3893;4361;4386;5006		3;4;5;6			259;262;296;469
CON__P08779	CON__P08779	9	6	2		1	9	6	2	20.7	15.9	6.8	51.267	473	473	0	52.75	0.03329	0.052999	59.893	2	2	Median	260000000	251000000	9876700			#ERROR!	5	111;172;554;914;1138;1171;2211;2364;2456	True;True;True;True;False;False;True;True;False	118;180;569;937;1170;1204;2288;2449;2543;2544	148;233;736;1200;1498;1537;2912;3119;3243;3244;3245	240;371;1166;1862;2311;2371;4428;4748;4923;4924;4925	240;371;1166;1862;2311;2371;4428;4748;4925		2			121
CON__P13645;CON__P02535-1;CON__Q7Z3Y7;CON__Q148H6;CON__Q7Z3Z0;CON__Q2M2I5;CON__Q7Z3Y8;CON__P05784;CON__Q14532;CON__A2AB72;CON__Q497I4;CON__O76015;CON__Q9UE12;CON__Q92764;CON__O76013;CON__Q7Z3Y9;CON__O76014;CON__REFSEQ:XP_986630;CON__Q99456;CON__A2A5Y0;CON__Q15323;CON__Q14525	CON__P13645	22;9;3;3;2;2;2;2;1;1;1;1;1;1;1;1;1;1;1;1;1;1	22;9;3;3;2;2;2;2;1;1;1;1;1;1;1;1;1;1;1;1;1;1	17;5;1;1;1;0;1;0;0;0;0;0;0;0;0;0;0;0;0;0;0;0		22	22	22	17	36.6	36.6	30.7	59.51	593	593;570;486;464;450;525;459;423;448;453;455;456;416;425;467;468;471;476;494;416;416;404	0	252.66	0.047197	0.075898	108.97	22	22	Median	5810000000	5590000000	225000000			#ERROR!	6	114;248;494;764;932;990;1138;1171;1200;1262;1622;1741;1742;1743;1858;1904;1926;1990;1991;2015;2365;2456	True;True;True;True;True;True;True;True;True;True;True;True;True;True;True;True;True;True;True;True;True;True	121;256;509;785;956;1018;1170;1204;1233;1297;1679;1801;1802;1803;1922;1969;1991;2059;2060;2086;2450;2543;2544	152;325;660;661;999;1224;1307;1498;1537;1573;1658;1659;2132;2133;2286;2287;2288;2445;2504;2534;2620;2621;2622;2655;3120;3121;3243;3244;3245	246;517;1052;1053;1553;1899;2025;2311;2371;2424;2557;2558;3265;3266;3486;3487;3488;3721;3811;3853;3994;3995;3996;4046;4047;4048;4749;4750;4923;4924;4925	246;517;1053;1553;1899;2025;2311;2371;2424;2557;3266;3486;3487;3488;3721;3811;3853;3994;3995;4047;4750;4925		2;7;8			150;306;321
CON__P13647;CON__Q8VED5;CON__P05787;CON__O95678;CON__Q5XKE5;CON__H-INV:HIT000016045;CON__Q7RTS7;CON__Q6ISB0;CON__Q32MB2;CON__P07744;CON__Q9DCV7;CON__Q3SY84;CON__Q6IME9;CON__Q14CN4-1;CON__Q9H552;CON__P08729;CON__Q3KNV1;CON__Q9NSB2	CON__P13647;CON__Q8VED5	6;3;2;2;2;1;1;1;1;1;1;1;1;1;1;1;1;1	1;0;0;0;0;0;0;0;0;0;0;0;0;0;0;0;0;0	1;0;0;0;0;0;0;0;0;0;0;0;0;0;0;0;0;0	;	18	6	1	1	9.7	1.7	1.7	62.378	590	590;531;483;551;535;99;529;600;540;525;457;523;520;511;499;469;469;600	0	8.6439	0.023306	0.037981	NaN	1	1	Median	63501000	62308000	1193200			#ERROR!	7	584;810;1148;1545;1549;2526	False;False;True;False;False;False	601;831;1180;1600;1604;2616	776;777;1061;1509;2029;2030;2034;3338	1219;1220;1649;2327;3116;3117;3122;5065	1219;1649;2327;3116;3122;5065		9			389
CON__P35527	CON__P35527	17	16	16		1	17	16	16	30.2	29.1	29.1	62.129	623	623	0	188.98	0.10635	0.17202	201.78	12	12	Median	2680000000	1670000000	1010000000			#ERROR!	8	286;443;602;655;709;710;933;986;987;1075;1171;1469;1678;1685;2032;2169;2427	True;True;True;True;True;True;True;True;True;True;False;True;True;True;True;True;True	295;458;619;673;727;728;957;1014;1015;1105;1204;1521;1522;1736;1744;2103;2245;2514	381;596;799;867;930;931;1225;1303;1304;1419;1537;1940;1941;2203;2213;2677;2858;3208;3209	604;948;1251;1353;1452;1453;1900;2021;2022;2191;2371;2979;2980;3366;3382;4090;4359;4874;4875	604;948;1251;1353;1452;1453;1900;2021;2022;2191;2371;2980;3366;3382;4090;4359;4874		10;11;12			157;234;245
CON__P35908v2;CON__P35908;CON__Q9R0H5;CON__Q6NXH9;CON__Q7Z794;CON__P19013;CON__P12035;CON__Q01546	CON__P35908v2;CON__P35908	22;22;2;2;2;2;2;2	22;22;2;2;2;2;2;2	15;15;0;0;0;0;0;0	;	8	22	22	15	38.5	38.5	27.4	65.432	639	639;645;524;539;578;594;629;638	0	210.27	0.063747	0.10301	113.35	16	16	Median	4350000000	4200000000	152000000			#ERROR!	9	8;165;356;584;620;704;708;711;766;882;1136;1297;1543;1549;1619;1903;1943;2060;2061;2225;2300;2554	True;True;True;True;True;True;True;True;True;True;True;True;True;True;True;True;True;True;True;True;True;True	8;173;369;601;637;722;726;729;787;904;1168;1333;1598;1604;1676;1968;2009;2132;2133;2302;2379;2644	10;223;474;776;777;819;924;929;932;1001;1155;1156;1496;1704;2027;2034;2129;2503;2555;2556;2712;2713;2929;3023;3372	18;358;741;1219;1220;1273;1444;1451;1454;1556;1790;1791;2309;2625;3114;3122;3261;3810;3891;3892;4142;4143;4452;4599;5115	18;358;741;1219;1273;1444;1451;1454;1556;1791;2309;2625;3114;3122;3261;3810;3892;4142;4143;4452;4599;5115		13;14			257;294
CON__Q922U2;CON__Q5XQN5;CON__Q8BGZ7;CON__P50446	CON__Q922U2;CON__Q5XQN5	8;8;2;2	2;2;0;0	0;0;0;0	;	4	8	2	0	9.8	3.1	0	61.766	580	580;601;551;553	0	16.812	0.2979	0.48439	NaN	1	1	Median	3774000	2902900	871110			#ERROR!	10	584;810;1337;1545;1856;1857;1915;2526	False;True;False;False;False;False;False;True	601;831;1375;1600;1920;1921;1980;2616	776;777;1061;1759;1760;2029;2030;2443;2444;2521;2522;3338	1219;1220;1649;2721;2722;3116;3117;3719;3720;3835;3836;5065	1219;1649;2722;3116;3719;3720;3835;5065		9			383
REV__CON__Q9Z2K1;REV__CON__Q3ZAW8	REV__CON__Q9Z2K1;REV__CON__Q3ZAW8	1;1	1;1	1;1	;	2	1	1	1	0	0	0	51.606	469	469;474	0.007653	5.7475	0.49669	0.79124	NaN	1	0	Median	124000000	83092000	40606000		#ERROR!	#ERROR!	11	2368	TRUE	2453	3124	4754	4754
REV__sp|P0C155|CBPS2_YEAST	REV__sp|P0C155|CBPS2_YEAST	1	1	1	sp|P0C155|CBPS2_YEAST Putative carboxypeptidase YOL153C OS=Saccharomyces cerevisiae (strain ATCC 204508 / S288c) GN=YOL153C PE=5 SV=1	1	1	1	1	0	0	0	65.092	581	581	0.002618	5.8803	0.5914	0.94106	0	2	0	Median	213000000	132000000	80994000		#ERROR!		12	1668	TRUE	1726	2190;2191	3350;3351;3352	3350
REV__sp|P19659|MED15_YEAST	REV__sp|P19659|MED15_YEAST	1	1	1	sp|P19659|MED15_YEAST Mediator of RNA polymerase II transcription subunit 15 OS=Saccharomyces cerevisiae (strain ATCC 204508 / S288c) GN=GAL11 PE=1 SV=3	1	1	1	1	0	0	0	120.31	1081	1081	1	-2	NaN	NaN	NaN	0	0	Median	0	0	0	#ERROR!	#ERROR!		13	1950	TRUE	2016	2566	3904	3904		15			137
REV__sp|P38333|ENP1_YEAST	REV__sp|P38333|ENP1_YEAST	1	1	1	sp|P38333|ENP1_YEAST Essential nuclear protein 1 OS=Saccharomyces cerevisiae (strain ATCC 204508 / S288c) GN=ENP1 PE=1 SV=1	1	1	1	1	0	0	0	55.136	483	483	0.005128	5.7732	0.73592	1.182	NaN	1	0	Median	34506000	20241000	14265000		#ERROR!		14	1920	TRUE	1985	2528	3846	3846
REV__sp|P53329|YG5Q_YEAST	REV__sp|P53329|YG5Q_YEAST	1	1	1	sp|P53329|YG5Q_YEAST Uncharacterized protein YGR273C OS=Saccharomyces cerevisiae (strain ATCC 204508 / S288c) GN=YGR273C PE=4 SV=1	1	1	1	1	0	0	0	20.014	174	174	1	-2	0.1055	0.17196	NaN	1	0	Median	3613500	3213000	400430	#ERROR!	#ERROR!		15	1527	TRUE	1582	2008	3087	3087		16			100
REV__sp|Q05080|CYK2_YEAST	REV__sp|Q05080|CYK2_YEAST	1	1	1	sp|Q05080|CYK2_YEAST Cytokinesis protein 2 OS=Saccharomyces cerevisiae (strain ATCC 204508 / S288c) GN=HOF1 PE=1 SV=1	1	1	1	1	0	0	0	76.206	669	669	1	-2	0.72335	1.1662	NaN	1	0	Median	23494000	12686000	10807000	#ERROR!	#ERROR!		16	1249	TRUE	1284	1641	2530	2530		17			364
sp|D6VTK4|STE2_YEAST	sp|D6VTK4|STE2_YEAST	2	2	2	sp|D6VTK4|STE2_YEAST Pheromone alpha factor receptor OS=Saccharomyces cerevisiae (strain ATCC 204508 / S288c) GN=STE2 PE=1 SV=2	1	2	2	2	6	6	6	47.848	431	431	0	17.13	0.77746	1.2526	2.4611	2	0	Median	155000000	84419000	70934000				17	2122;2194	True;True	2196;2270	2790;2889	4252;4253;4399	4252;4399
sp|O13516|RS9A_YEAST	sp|O13516|RS9A_YEAST	15	15	1	sp|O13516|RS9A_YEAST 40S ribosomal protein S9-A OS=Saccharomyces cerevisiae (strain ATCC 204508 / S288c) GN=RPS9A PE=1 SV=3	1	15	15	1	55.8	55.8	9.1	22.443	197	197	0	115.97	0.4411	0.70212	9.5117	18	2	Leave out requantified	4390000000	2990000000	1400000000				18	821;822;995;1040;1083;1151;1191;1206;1331;1695;1779;1785;2308;2341;2342	True;True;True;True;True;True;True;True;True;True;True;True;True;True;True	842;843;1023;1070;1113;1183;1224;1239;1369;1754;1755;1839;1845;2387;2424;2425	1075;1076;1312;1313;1372;1428;1512;1562;1582;1750;1751;2225;2226;2333;2340;2341;3032;3033;3084;3085	1686;1687;1688;2033;2034;2122;2207;2208;2331;2407;2438;2439;2710;2711;2712;3398;3399;3400;3401;3556;3557;3566;3567;4612;4613;4614;4696;4697;4698	1686;1688;2034;2122;2208;2331;2407;2438;2712;3400;3556;3566;4612;4696;4697		18			147
sp|O13563|RPN13_YEAST	sp|O13563|RPN13_YEAST	1	1	1	sp|O13563|RPN13_YEAST 26S proteasome regulatory subunit RPN13 OS=Saccharomyces cerevisiae (strain ATCC 204508 / S288c) GN=RPN13 PE=1 SV=1	1	1	1	1	8.3	8.3	8.3	17.902	156	156	0	8.3372	0.77485	1.2453	5.599	2	2	Median	159000000	81579000	77327000				19	1595	TRUE	1651	2094;2095	3213;3214	3214
sp|O14455|RL36B_YEAST	sp|O14455|RL36B_YEAST	6	6	2	sp|O14455|RL36B_YEAST 60S ribosomal protein L36-B OS=Saccharomyces cerevisiae (strain ATCC 204508 / S288c) GN=RPL36B PE=1 SV=3	1	6	6	2	43	43	10	11.135	100	100	0	46.339	0.55348	0.87851	13.886	9	2	Leave out requantified	2110000000	1230000000	875000000				20	103;436;1127;2123;2309;2460	True;True;True;True;True;True	108;451;1159;2197;2388;2548	131;132;587;1487;2791;2792;3034;3249;3250;3251	213;214;215;929;930;2297;2298;4254;4255;4256;4615;4616;4617;4929;4930;4931;4932	215;929;2298;4256;4615;4931		19;20			20;90
sp|P00330|ADH1_YEAST;sp|P00331|ADH2_YEAST;sp|P38113|ADH5_YEAST;sp|P07246|ADH3_YEAST	sp|P00330|ADH1_YEAST	17;7;1;1	17;7;1;1	17;7;1;1	sp|P00330|ADH1_YEAST Alcohol dehydrogenase 1 OS=Saccharomyces cerevisiae (strain ATCC 204508 / S288c) GN=ADH1 PE=1 SV=5	4	17	17	17	51.1	51.1	51.1	36.849	348	348;348;351;375	0	184.17	0.36107	0.57004	7.7601	26	3	Leave out requantified	14300000000	10400000000	3880000000				21	136;137;181;227;292;294;383;459;782;894;1315;1891;1894;2376;2377;2473;2614	True;True;True;True;True;True;True;True;True;True;True;True;True;True;True;True;True	143;144;145;189;235;301;303;397;474;803;916;1352;1353;1956;1959;2462;2463;2562;2710	182;183;184;185;246;247;302;387;389;390;514;614;1024;1025;1173;1730;1731;1732;2488;2491;3134;3135;3136;3266;3458;3459	294;295;296;297;298;299;390;391;474;475;613;614;616;617;618;806;807;984;985;1590;1591;1592;1593;1817;1818;2668;2669;2670;2671;3787;3788;3791;3792;4768;4769;4770;4771;4955;4956;4957;5247;5248;5249;5250	294;299;391;475;613;618;806;985;1592;1818;2670;3787;3792;4768;4771;4956;5247		21;22			76;271
sp|P00358|G3P2_YEAST	sp|P00358|G3P2_YEAST	15	1	0	sp|P00358|G3P2_YEAST Glyceraldehyde-3-phosphate dehydrogenase 2 OS=Saccharomyces cerevisiae (strain ATCC 204508 / S288c) GN=TDH2 PE=1 SV=3	1	15	1	0	48.8	7.2	0	35.846	332	332	0	7.8388	0.17766	0.28327	NaN	1	1	Median	92083000	79148000	12935000				22	472;549;1028;1130;1303;1373;2085;2246;2273;2355;2387;2425;2467;2476;2510	False;False;False;False;False;False;False;False;False;True;False;False;False;False;False	487;564;1058;1162;1339;1411;1412;2157;2324;2352;2440;2473;2512;2556;2565;2599	634;635;730;731;1357;1490;1710;1801;1802;1803;2744;2957;2992;3107;3148;3206;3260;3269;3314	1012;1013;1014;1015;1016;1017;1018;1159;1160;1161;2103;2301;2634;2782;2783;2784;2785;4186;4187;4188;4496;4497;4498;4499;4500;4501;4548;4549;4729;4786;4787;4871;4944;4945;4961;4962;5028	1018;1160;2103;2301;2634;2785;4186;4497;4549;4729;4786;4871;4944;4961;5028		23;24;25;26;27			128;131;173;179;229
sp|P00359|G3P3_YEAST	sp|P00359|G3P3_YEAST	17	17	2	sp|P00359|G3P3_YEAST Glyceraldehyde-3-phosphate dehydrogenase 3 OS=Saccharomyces cerevisiae (strain ATCC 204508 / S288c) GN=TDH3 PE=1 SV=3	1	17	17	2	53	53	9.3	35.746	332	332	0	141.94	0.16176	0.25424	15.899	22	7	Leave out requantified	6760000000	5780000000	982000000				23	472;549;825;854;1028;1130;1303;1373;2085;2246;2273;2354;2387;2425;2467;2476;2510	True;True;True;True;True;True;True;True;True;True;True;True;True;True;True;True;True	487;564;846;875;1058;1162;1339;1411;1412;2157;2324;2352;2438;2439;2473;2512;2556;2565;2599	634;635;730;731;1080;1120;1357;1490;1710;1801;1802;1803;2744;2957;2992;3104;3105;3106;3148;3206;3260;3269;3314	1012;1013;1014;1015;1016;1017;1018;1159;1160;1161;1692;1742;2103;2301;2634;2782;2783;2784;2785;4186;4187;4188;4496;4497;4498;4499;4500;4501;4548;4549;4726;4727;4728;4786;4787;4871;4944;4945;4961;4962;5028	1018;1160;1692;1742;2103;2301;2634;2785;4186;4497;4549;4726;4786;4871;4944;4961;5028		23;24;25;28			128;131;173;229
sp|P00549|KPYK1_YEAST;sp|P52489|KPYK2_YEAST	sp|P00549|KPYK1_YEAST	37;3	37;3	37;3	sp|P00549|KPYK1_YEAST Pyruvate kinase 1 OS=Saccharomyces cerevisiae (strain ATCC 204508 / S288c) GN=CDC19 PE=1 SV=2	2	37	37	37	70.4	70.4	70.4	54.544	500	500;506	0	323.31	0.3615	0.57153	11.287	51	2	Leave out requantified	15000000000	10700000000	4290000000				24	47;55;67;88;99;513;562;563;694;695;697;787;788;883;966;969;1044;1067;1109;1110;1381;1456;1493;1638;1646;1794;1854;1958;1959;2047;2079;2134;2191;2192;2219;2451;2592	True;True;True;True;True;True;True;True;True;True;True;True;True;True;True;True;True;True;True;True;True;True;True;True;True;True;True;True;True;True;True;True;True;True;True;True;True	48;49;57;69;93;104;528;577;578;712;713;715;808;809;905;993;994;997;1074;1097;1141;1142;1421;1506;1546;1695;1703;1854;1918;2024;2025;2119;2151;2208;2209;2267;2268;2296;2538;2686	56;57;58;59;68;85;115;127;686;745;746;747;748;911;912;915;1031;1032;1033;1157;1158;1271;1272;1276;1277;1376;1406;1407;1461;1462;1463;1813;1920;1921;1967;2151;2159;2353;2441;2575;2576;2696;2697;2736;2806;2807;2884;2885;2886;2921;2922;3236;3237;3421;3422	91;92;93;94;95;96;97;98;113;139;186;187;207;208;1086;1087;1179;1180;1181;1182;1183;1184;1424;1425;1426;1427;1432;1602;1603;1604;1605;1792;1793;1794;1795;1964;1965;1966;1972;1973;2127;2169;2170;2171;2257;2258;2259;2260;2797;2798;2952;2953;3019;3020;3293;3294;3303;3304;3586;3717;3917;3918;4121;4122;4173;4174;4277;4278;4279;4280;4391;4392;4393;4394;4441;4442;4443;4912;4913;4914;5188;5189;5190	93;113;139;186;208;1086;1180;1183;1426;1427;1432;1603;1604;1793;1964;1973;2127;2171;2257;2258;2797;2953;3020;3293;3303;3586;3717;3917;3918;4122;4173;4278;4391;4394;4441;4913;5190		29;30;31;32;33;34;35			50;109;126;261;300;304;330
sp|P00830|ATPB_YEAST	sp|P00830|ATPB_YEAST	14	14	14	sp|P00830|ATPB_YEAST ATP synthase subunit beta, mitochondrial OS=Saccharomyces cerevisiae (strain ATCC 204508 / S288c) GN=ATP2 PE=1 SV=2	1	14	14	14	35.4	35.4	35.4	54.793	511	511	0	122.55	0.53805	0.86632	13.746	15	3	Leave out requantified	1640000000	1030000000	615000000				25	428;544;626;660;717;900;925;1264;2138;2249;2274;2367;2429;2466	True;True;True;True;True;True;True;True;True;True;True;True;True;True	443;559;643;678;735;922;948;1299;2213;2327;2353;2452;2516;2555	575;722;826;827;872;939;1180;1216;1661;2813;2962;2993;2994;3123;3211;3259	912;1149;1281;1282;1283;1361;1362;1465;1832;1889;1890;2560;2561;4291;4508;4550;4551;4752;4753;4877;4878;4942;4943	912;1149;1281;1361;1465;1832;1890;2560;4291;4508;4550;4753;4877;4942		36;37			97;255
sp|P00925|ENO2_YEAST;sp|P00924|ENO1_YEAST	sp|P00925|ENO2_YEAST	6;2	6;2	6;2	sp|P00925|ENO2_YEAST Enolase 2 OS=Saccharomyces cerevisiae (strain ATCC 204508 / S288c) GN=ENO2 PE=1 SV=2	2	6	6	6	16.5	16.5	16.5	46.914	437	437;437	0	62.974	0.40215	0.64435	11.213	6	2	Leave out requantified	537000000	370000000	167000000				26	192;878;899;2070;2105;2411	True;True;True;True;True;True	200;900;921;2142;2178;2498	259;1150;1151;1179;2725;2770;3188	404;405;1783;1784;1830;1831;4159;4225;4845	404;1784;1830;4159;4225;4845		38			184
sp|P00950|PMG1_YEAST	sp|P00950|PMG1_YEAST	3	3	3	sp|P00950|PMG1_YEAST Phosphoglycerate mutase 1 OS=Saccharomyces cerevisiae (strain ATCC 204508 / S288c) GN=GPM1 PE=1 SV=3	1	3	3	3	13	13	13	27.608	247	247	0	18.909	0.31084	0.50007	19.395	3	1	Median	57314000	40616000	16697000				27	816;829;1279	True;True;True	837;850;1315	1067;1088;1682	1657;1702;2596	1657;1702;2596
sp|P00958|SYMC_YEAST	sp|P00958|SYMC_YEAST	2	2	2	sp|P00958|SYMC_YEAST Methionine--tRNA ligase, cytoplasmic OS=Saccharomyces cerevisiae (strain ATCC 204508 / S288c) GN=MES1 PE=1 SV=4	1	2	2	2	3.3	3.3	3.3	85.677	751	751	0	12.439	0.46288	0.75601	18.16	2	1	Median	13829000	9055900	4773400				28	231;291	True;True	239;300	306;386	480;612	480;612
sp|P02294|H2B2_YEAST;sp|P02293|H2B1_YEAST	sp|P02294|H2B2_YEAST;sp|P02293|H2B1_YEAST	4;4	4;4	4;4	sp|P02294|H2B2_YEAST Histone H2B.2 OS=Saccharomyces cerevisiae (strain ATCC 204508 / S288c) GN=HTB2 PE=1 SV=2;sp|P02293|H2B1_YEAST Histone H2B.1 OS=Saccharomyces cerevisiae (strain ATCC 204508 / S288c) GN=HTB1 PE=1 SV=2	2	4	4	4	26.7	26.7	26.7	14.237	131	131;131	0	28.08	0.41878	0.66528	17.508	4	2	Median	424000000	295000000	130000000				29	453;804;1248;1749	True;True;True;True	468;825;1283;1809	607;1053;1640;2294	964;1632;1633;1634;1635;1636;2528;2529;3496	964;1634;2528;3496
sp|P02309|H4_YEAST	sp|P02309|H4_YEAST	5	5	5	sp|P02309|H4_YEAST Histone H4 OS=Saccharomyces cerevisiae (strain ATCC 204508 / S288c) GN=HHF1 PE=1 SV=2	1	5	5	5	50.5	50.5	50.5	11.368	103	103	0	35.822	0.52702	0.84793	15.627	6	1	Leave out requantified	745000000	510000000	235000000				30	317;346;996;1867;2259	True;True;True;True;True	327;358;1024;1931;2337	423;424;462;1314;2455;2972	667;668;726;727;2035;3737;4521;4522	667;726;2035;3737;4521
sp|P02400|RLA4_YEAST	sp|P02400|RLA4_YEAST	4	4	4	sp|P02400|RLA4_YEAST 60S acidic ribosomal protein P2-beta OS=Saccharomyces cerevisiae (strain ATCC 204508 / S288c) GN=RPP2B PE=1 SV=2	1	4	4	4	34.5	34.5	34.5	11.05	110	110	0	39.042	0.72861	1.1514	9.7897	8	0	Leave out requantified	3080000000	1750000000	1330000000				31	213;761;762;967	True;True;True;True	221;782;783;995	286;287;994;995;996;997;1273;1274	448;449;450;451;1544;1545;1546;1547;1548;1549;1550;1967;1968;1969	449;1545;1550;1968
sp|P02406|RL28_YEAST	sp|P02406|RL28_YEAST	8	8	8	sp|P02406|RL28_YEAST 60S ribosomal protein L28 OS=Saccharomyces cerevisiae (strain ATCC 204508 / S288c) GN=RPL28 PE=1 SV=3	1	8	8	8	45.6	45.6	45.6	16.721	149	149	0	70.382	0.64569	1.0266	5.7231	11	1	Leave out requantified	12400000000	7410000000	5000000000				32	10;539;750;982;1411;1412;1726;2543	True;True;True;True;True;True;True;True	10;554;771;1010;1453;1454;1786;2633	12;715;716;717;981;982;1296;1297;1851;1852;2268;3359	21;1136;1137;1138;1139;1140;1141;1142;1523;1524;1525;1526;1527;2006;2007;2008;2009;2010;2011;2851;2852;2853;2854;2855;3460;5096;5097	21;1140;1527;2009;2852;2855;3460;5096
sp|P14127|RS17B_YEAST;sp|P02407|RS17A_YEAST	sp|P14127|RS17B_YEAST;sp|P02407|RS17A_YEAST	10;10	10;10	10;10	sp|P14127|RS17B_YEAST 40S ribosomal protein S17-B OS=Saccharomyces cerevisiae (strain ATCC 204508 / S288c) GN=RPS17B PE=1 SV=1;sp|P02407|RS17A_YEAST 40S ribosomal protein S17-A OS=Saccharomyces cerevisiae (strain ATCC 204508 / S288c) GN=RPS17A PE=1 SV=1	2	10	10	10	60.3	60.3	60.3	15.803	136	136;136	0	101.14	0.60572	0.97878	7.0791	14	1	Leave out requantified	13000000000	7960000000	5020000000				33	325;849;1059;1177;1314;1322;1375;1376;1777;1957	True;True;True;True;True;True;True;True;True;True	337;870;1089;1210;1351;1360;1414;1415;1837;2023	437;1114;1115;1395;1396;1544;1545;1728;1729;1739;1805;1806;2330;2574	691;692;1735;1736;1737;2154;2155;2156;2157;2380;2381;2382;2665;2666;2667;2697;2698;2787;2788;2789;3550;3915;3916	692;1737;2155;2380;2665;2697;2788;2789;3550;3916		39			58
sp|P02557|TBB_YEAST	sp|P02557|TBB_YEAST	3	3	3	sp|P02557|TBB_YEAST Tubulin beta chain OS=Saccharomyces cerevisiae (strain ATCC 204508 / S288c) GN=TUB2 PE=1 SV=2	1	3	3	3	7.2	7.2	7.2	50.922	457	457	0	23.637	0.50971	0.82761	29.438	3	0	Leave out requantified	108000000	73971000	34029000				34	557;1176;1890	True;True;True	572;1209;1955	740;1543;2487	1172;2378;2379;3785;3786	1172;2378;3785		40			330
sp|P15108|HSC82_YEAST;sp|P02829|HSP82_YEAST	sp|P15108|HSC82_YEAST;sp|P02829|HSP82_YEAST	9;9	9;9	9;9	sp|P15108|HSC82_YEAST ATP-dependent molecular chaperone HSC82 OS=Saccharomyces cerevisiae (strain ATCC 204508 / S288c) GN=HSC82 PE=1 SV=4;sp|P02829|HSP82_YEAST ATP-dependent molecular chaperone HSP82 OS=Saccharomyces cerevisiae (strain ATCC 204508 / S288c)	2	9	9	9	13.3	13.3	13.3	80.899	705	705;709	0	73.087	0.40058	0.64731	12.861	7	3	Leave out requantified	259000000	178000000	80534000				35	90;342;792;1265;1703;1895;1971;2042;2179	True;True;True;True;True;True;True;True;True	95;354;813;1300;1763;1960;2038;2113;2255	117;458;1038;1662;2237;2492;2593;2688;2871	189;721;1611;2562;3416;3793;3953;4109;4376	189;721;1611;2562;3416;3793;3953;4109;4376		41;42			599;603
sp|P02994|EF1A_YEAST	sp|P02994|EF1A_YEAST	16	16	16	sp|P02994|EF1A_YEAST Elongation factor 1-alpha OS=Saccharomyces cerevisiae (strain ATCC 204508 / S288c) GN=TEF1 PE=1 SV=1	1	16	16	16	34.9	34.9	34.9	50.032	458	458	0	119.52	0.46403	0.73951	7.484	22	0	Leave out requantified	6770000000	4600000000	2170000000				36	233;547;548;591;669;740;896;1085;1706;1751;1772;1872;2044;2318;2517;2589	True;True;True;True;True;True;True;True;True;True;True;True;True;True;True;True	241;562;563;608;687;761;918;1115;1766;1811;1832;1936;2115;2398;2399;2606;2683	309;727;728;729;785;881;970;1175;1430;2240;2296;2297;2322;2461;2462;2690;2691;3047;3048;3324;3325;3417;3418	485;486;487;488;489;490;491;492;493;494;1156;1157;1158;1228;1229;1374;1375;1376;1509;1820;1821;2210;2211;2212;2213;2214;2215;3421;3498;3499;3500;3533;3534;3535;3536;3537;3745;3746;3747;3748;4111;4112;4113;4114;4634;4635;4636;4637;5046;5047;5048;5181;5182;5183;5184	489;1157;1158;1228;1374;1509;1820;2212;3421;3500;3535;3746;4111;4636;5046;5183		43;44;45			274;292;408
sp|P04147|PABP_YEAST	sp|P04147|PABP_YEAST	15	15	15	sp|P04147|PABP_YEAST Polyadenylate-binding protein, cytoplasmic and nuclear OS=Saccharomyces cerevisiae (strain ATCC 204508 / S288c) GN=PAB1 PE=1 SV=4	1	15	15	15	33.4	33.4	33.4	64.343	577	577	0	183.17	0.82716	1.3253	19.575	14	0	Leave out requantified	1660000000	903000000	752000000				37	86;194;338;392;516;606;701;1485;1535;1547;1590;1655;1982;2067;2587	True;True;True;True;True;True;True;True;True;True;True;True;True;True;True	91;202;350;406;531;623;719;1538;1590;1602;1646;1712;2050;2139;2681	113;261;454;523;689;690;803;921;1958;2018;2032;2086;2087;2171;2609;2720;3415	183;184;407;408;715;820;1092;1093;1256;1441;3008;3009;3102;3103;3119;3120;3203;3204;3205;3323;3977;3978;4150;5177;5178	183;407;715;820;1093;1256;1441;3009;3102;3120;3203;3323;3977;4150;5177
sp|P04449|RL24A_YEAST	sp|P04449|RL24A_YEAST	6	1	1	sp|P04449|RL24A_YEAST 60S ribosomal protein L24-A OS=Saccharomyces cerevisiae (strain ATCC 204508 / S288c) GN=RPL24A PE=1 SV=1	1	6	1	1	27.1	7.7	7.7	17.613	155	155	0	8.9629	0.64779	1.0359	14.453	2	0	Median	381000000	218000000	163000000				38	164;720;1070;1442;1636;1924	False;False;False;True;False;False	172;738;1100;1487;1693;1989	221;222;943;1411;1896;1897;2149;2532	355;356;357;1471;1472;2177;2178;2915;2916;2917;2918;3290;3291;3850;3851	356;1471;2177;2917;3291;3850		46			1
sp|P04456|RL25_YEAST	sp|P04456|RL25_YEAST	5	5	5	sp|P04456|RL25_YEAST 60S ribosomal protein L25 OS=Saccharomyces cerevisiae (strain ATCC 204508 / S288c) GN=RPL25 PE=1 SV=4	1	5	5	5	33.1	33.1	33.1	15.757	142	142	0	52.603	0.66559	1.0623	4.2892	10	1	Leave out requantified	4250000000	2520000000	1720000000				39	496;1371;2349;2412;2413	True;True;True;True;True	511;1409;2432;2433;2499;2500	663;664;1798;1799;3097;3098;3099;3189;3190;3191	1055;1056;1057;2778;2779;4716;4717;4718;4719;4720;4846;4847;4848;4849;4850	1056;2778;4716;4846;4850		47			73
sp|P04650|RL39_YEAST	sp|P04650|RL39_YEAST	1	1	1	sp|P04650|RL39_YEAST 60S ribosomal protein L39 OS=Saccharomyces cerevisiae (strain ATCC 204508 / S288c) GN=RPL39 PE=1 SV=3	1	1	1	1	19.6	19.6	19.6	6.3415	51	51	0	7.3295	0.68728	1.0911	6.6291	2	0	Median	412000000	253000000	159000000				40	1718	TRUE	1778	2256;2257	3442;3443;3444	3442
sp|P04840|VDAC1_YEAST	sp|P04840|VDAC1_YEAST	5	5	5	sp|P04840|VDAC1_YEAST Mitochondrial outer membrane protein porin 1 OS=Saccharomyces cerevisiae (strain ATCC 204508 / S288c) GN=POR1 PE=1 SV=4	1	5	5	5	24.7	24.7	24.7	30.428	283	283	0	50.916	0.51326	0.83107	17.913	4	1	Leave out requantified	197000000	126000000	70533000				41	1510;1748;1824;2436;2513	True;True;True;True;True	1564;1808;1885;2523;2602	1987;2293;2398;3220;3317	3048;3495;3653;3654;4890;5032	3048;3495;3653;4890;5032		48			167
sp|P04911|H2A1_YEAST;sp|P04912|H2A2_YEAST;sp|Q12692|H2AZ_YEAST	sp|P04911|H2A1_YEAST;sp|P04912|H2A2_YEAST;sp|Q12692|H2AZ_YEAST	1;1;1	1;1;1	1;1;1	sp|P04911|H2A1_YEAST Histone H2A.1 OS=Saccharomyces cerevisiae (strain ATCC 204508 / S288c) GN=HTA1 PE=1 SV=2;sp|P04912|H2A2_YEAST Histone H2A.2 OS=Saccharomyces cerevisiae (strain ATCC 204508 / S288c) GN=HTA2 PE=1 SV=2;sp|Q12692|H2AZ_YEAST Histone H2A.Z O	3	1	1	1	5.3	5.3	5.3	13.989	132	132;132;134	0	5.9326	0.55196	0.89746	NaN	1	1	Median	54375000	31726000	22648000				42	830	TRUE	851	1089	1703	1703
sp|P05030|PMA1_YEAST;sp|P19657|PMA2_YEAST	sp|P05030|PMA1_YEAST;sp|P19657|PMA2_YEAST	20;12	20;12	20;12	sp|P05030|PMA1_YEAST Plasma membrane ATPase 1 OS=Saccharomyces cerevisiae (strain ATCC 204508 / S288c) GN=PMA1 PE=1 SV=2;sp|P19657|PMA2_YEAST Plasma membrane ATPase 2 OS=Saccharomyces cerevisiae (strain ATCC 204508 / S288c) GN=PMA2 PE=1 SV=3	2	20	20	20	26.4	26.4	26.4	99.618	918	918;947	0	203.81	0.53915	0.86732	9.2336	24	3	Leave out requantified	2230000000	1410000000	823000000				43	3;33;283;686;795;839;1037;1126;1294;1339;1450;1649;2043;2154;2247;2269;2372;2448;2450;2539	True;True;True;True;True;True;True;True;True;True;True;True;True;True;True;True;True;True;True;True	3;34;292;704;816;860;1067;1158;1330;1377;1500;1706;2114;2230;2325;2348;2458;2535;2537;2629	4;41;376;901;1042;1101;1368;1369;1485;1486;1701;1762;1914;2162;2163;2689;2837;2958;2959;2986;3129;3233;3235;3355	5;64;595;596;1407;1617;1719;2117;2118;2293;2294;2295;2296;2622;2724;2944;3307;3308;3309;4110;4326;4327;4502;4503;4504;4540;4761;4906;4907;4910;4911;5089	5;64;595;1407;1617;1719;2118;2295;2622;2724;2944;3309;4110;4327;4504;4540;4761;4907;4910;5089		49;50;51;52;53;54;55			105;556;631;886;891;904;907
sp|P05085|ARGR2_YEAST	sp|P05085|ARGR2_YEAST	16	16	16	sp|P05085|ARGR2_YEAST Arginine metabolism regulation protein II OS=Saccharomyces cerevisiae (strain ATCC 204508 / S288c) GN=ARG81 PE=1 SV=3	1	16	16	16	23.4	23.4	23.4	100.28	880	880	0	135.96	0.73441	1.1689	10.01	16	1	Leave out requantified	1780000000	1020000000	752000000				44	122;384;455;833;1012;1025;1149;1255;1473;1598;1863;1928;1933;1961;2120;2307	True;True;True;True;True;True;True;True;True;True;True;True;True;True;True;True	129;398;470;854;1041;1054;1181;1290;1526;1655;1927;1993;1998;2027;2194;2386	163;515;609;1094;1337;1352;1510;1649;1945;2099;2450;2536;2541;2580;2787;3031	262;263;808;966;967;1711;2074;2093;2328;2329;2546;2985;2986;3220;3727;3728;3856;3857;3864;3865;3923;3924;4248;4249;4610;4611	262;808;966;1711;2074;2093;2328;2546;2985;3220;3727;3857;3865;3923;4248;4610		56;57;58			408;428;814
sp|P05317|RLA0_YEAST	sp|P05317|RLA0_YEAST	10	10	10	sp|P05317|RLA0_YEAST 60S acidic ribosomal protein P0 OS=Saccharomyces cerevisiae (strain ATCC 204508 / S288c) GN=RPP0 PE=1 SV=2	1	10	10	10	28.8	28.8	28.8	33.717	312	312	0	75.643	0.39357	0.62627	6.3281	12	2	Leave out requantified	3020000000	2090000000	937000000				45	58;203;214;577;741;773;1043;1335;1614;2217	True;True;True;True;True;True;True;True;True;True	60;211;222;594;762;794;1073;1373;1671;2294	72;273;274;288;766;971;1012;1375;1756;2122;2123;2919	120;121;426;427;452;1206;1510;1511;1574;1575;2125;2126;2718;3250;3251;3252;4437;4438;4439	120;426;452;1206;1510;1575;2125;2718;3251;4437		59;60			53;128
sp|P05318|RLA1_YEAST	sp|P05318|RLA1_YEAST	1	1	1	sp|P05318|RLA1_YEAST 60S acidic ribosomal protein P1-alpha OS=Saccharomyces cerevisiae (strain ATCC 204508 / S288c) GN=RPP1A PE=1 SV=4	1	1	1	1	7.5	7.5	7.5	10.908	106	106	0	8.1977	0.19618	0.30932	128.93	2	0	Median	1090000000	787000000	304000000				46	107	TRUE	113	139;140	226;227;228	228
sp|P05319|RLA2_YEAST	sp|P05319|RLA2_YEAST	3	3	3	sp|P05319|RLA2_YEAST 60S acidic ribosomal protein P2-alpha OS=Saccharomyces cerevisiae (strain ATCC 204508 / S288c) GN=RPP2A PE=1 SV=1	1	3	3	3	65.1	65.1	65.1	10.746	106	106	0	26.994	0.67356	1.0571	3.841	2	0	Median	1380000000	820000000	560000000				47	1143;2041;2447	True;True;True	1175;2112;2534	1504;2687;3232	2321;4107;4108;4905	2321;4107;4905		61	0		100	96
sp|P05374|CHO2_YEAST	sp|P05374|CHO2_YEAST	2	2	2	sp|P05374|CHO2_YEAST Phosphatidylethanolamine N-methyltransferase OS=Saccharomyces cerevisiae (strain ATCC 204508 / S288c) GN=CHO2 PE=1 SV=1	1	2	2	2	2.3	2.3	2.3	101.2	869	869	0	12.212	0.76444	1.2382	NaN	1	0	Median	39346000	21826000	17519000				48	1757;2235	True;True	1817;2313	2305;2942	3511;4475	3511;4475		62			11
sp|P05453|ERF3_YEAST	sp|P05453|ERF3_YEAST	1	1	1	sp|P05453|ERF3_YEAST Eukaryotic peptide chain release factor GTP-binding subunit OS=Saccharomyces cerevisiae (strain ATCC 204508 / S288c) GN=SUP35 PE=1 SV=1	1	1	1	1	3.1	3.1	3.1	76.55	685	685	0	9.0187	0.65418	1.056	NaN	1	0	Median	48601000	32632000	15969000				49	993	TRUE	1021	1310	2030	2030
sp|P05737|RL7A_YEAST	sp|P05737|RL7A_YEAST	12	12	1	sp|P05737|RL7A_YEAST 60S ribosomal protein L7-A OS=Saccharomyces cerevisiae (strain ATCC 204508 / S288c) GN=RPL7A PE=1 SV=3	1	12	12	1	45.9	45.9	3.7	27.638	244	244	0	111.6	0.64783	1.0243	15.167	17	0	Leave out requantified	6250000000	3760000000	2490000000				50	12;184;574;813;959;960;1244;1355;1656;1735;2068;2421	True;True;True;True;True;True;True;True;True;True;True;True	12;192;591;834;984;985;1279;1393;1713;1795;2140;2508	15;16;250;762;763;1064;1257;1258;1259;1634;1635;1781;2172;2279;2721;2722;3200;3201	26;27;28;29;394;395;1201;1202;1203;1654;1942;1943;1944;1945;1946;2518;2519;2520;2521;2751;2752;2753;3324;3325;3476;4151;4152;4153;4154;4862;4863;4864	28;395;1201;1654;1943;1944;2518;2752;3325;3476;4153;4862
sp|P05738|RL9A_YEAST	sp|P05738|RL9A_YEAST	9	9	3	sp|P05738|RL9A_YEAST 60S ribosomal protein L9-A OS=Saccharomyces cerevisiae (strain ATCC 204508 / S288c) GN=RPL9A PE=1 SV=2	1	9	9	3	53.9	53.9	17.8	21.569	191	191	0	95.415	0.42823	0.68383	10.79	10	2	Leave out requantified	1850000000	1250000000	599000000				51	269;617;702;823;1516;1942;2285;2407;2548	True;True;True;True;True;True;True;True;True	278;634;720;844;1571;2008;2364;2494;2638	353;816;922;1077;1078;1996;2554;3005;3180;3181;3364	565;1270;1442;1689;1690;3062;3063;3889;3890;4567;4568;4569;4833;4834;4835;5104	565;1270;1442;1689;3063;3889;4567;4834;5104
sp|P05739|RL6B_YEAST	sp|P05739|RL6B_YEAST	10	10	5	sp|P05739|RL6B_YEAST 60S ribosomal protein L6-B OS=Saccharomyces cerevisiae (strain ATCC 204508 / S288c) GN=RPL6B PE=1 SV=4	1	10	10	5	56.2	56.2	28.4	19.986	176	176	0	78.067	0.55613	0.8981	17.485	15	3	Leave out requantified	2790000000	1760000000	1040000000				52	120;174;389;636;828;1764;2083;2403;2509;2612	True;True;True;True;True;True;True;True;True;True	127;182;403;653;849;1824;2155;2490;2598;2707	159;160;161;236;237;520;840;841;1086;1087;2314;2741;3175;3313;3453;3454	256;257;258;259;260;376;377;378;379;815;816;1303;1304;1305;1699;1700;1701;3523;4181;4182;4183;4827;5026;5027;5236;5237;5238;5239	259;377;815;1303;1701;3523;4183;4827;5027;5239
sp|P05740|RL17A_YEAST	sp|P05740|RL17A_YEAST	7	1	1	sp|P05740|RL17A_YEAST 60S ribosomal protein L17-A OS=Saccharomyces cerevisiae (strain ATCC 204508 / S288c) GN=RPL17A PE=1 SV=4	1	7	1	1	45.7	5.4	5.4	20.549	184	184	0	6.5058	0.71582	1.1278	NaN	1	0	Median	347000000	207000000	140000000				53	540;635;670;1421;2530;2534;2558	False;False;False;False;False;False;True	555;652;688;1463;2620;2624;2648	718;838;839;882;883;1866;1867;3343;3349;3377	1143;1144;1299;1300;1301;1302;1377;1378;1379;1380;2872;2873;2874;5070;5080;5081;5120;5121	1144;1302;1377;2873;5070;5081;5121
sp|P05744|RL33A_YEAST	sp|P05744|RL33A_YEAST	5	1	1	sp|P05744|RL33A_YEAST 60S ribosomal protein L33-A OS=Saccharomyces cerevisiae (strain ATCC 204508 / S288c) GN=RPL33A PE=1 SV=3	1	5	1	1	39.3	15	15	12.154	107	107	0	14.997	0.50721	0.79604	NaN	1	0	Median	802000000	530000000	273000000				54	879;891;1799;2109;2406	True;False;False;False;False	901;913;1859;2182;2493	1152;1169;2362;2363;2774;3178;3179	1785;1786;1812;3599;3600;4230;4830;4831;4832	1785;1812;3599;4230;4832
sp|P05745|RL36A_YEAST	sp|P05745|RL36A_YEAST	6	2	2	sp|P05745|RL36A_YEAST 60S ribosomal protein L36-A OS=Saccharomyces cerevisiae (strain ATCC 204508 / S288c) GN=RPL36A PE=1 SV=3	1	6	2	2	43	10	10	11.124	100	100	0	12.128	0.55185	0.91002	19.727	2	1	Median	16364000	10245000	6119500				55	103;436;1128;2123;2309;2461	False;False;True;False;False;True	108;451;1160;2197;2388;2549	131;132;587;1488;2791;2792;3034;3252	213;214;215;929;930;2299;4254;4255;4256;4615;4616;4617;4933	215;929;2299;4256;4615;4933		19;63			20;90
sp|P05748|RL15A_YEAST;sp|P54780|RL15B_YEAST	sp|P05748|RL15A_YEAST;sp|P54780|RL15B_YEAST	6;4	6;4	6;4	sp|P05748|RL15A_YEAST 60S ribosomal protein L15-A OS=Saccharomyces cerevisiae (strain ATCC 204508 / S288c) GN=RPL15A PE=1 SV=3;sp|P54780|RL15B_YEAST 60S ribosomal protein L15-B OS=Saccharomyces cerevisiae (strain ATCC 204508 / S288c) GN=RPL15B PE=1 SV=2	2	6	6	6	31.4	31.4	31.4	24.422	204	204;204	0	70.541	0.72176	1.1624	27.283	7	3	Leave out requantified	1350000000	577000000	774000000				56	19;689;1720;2386;2556;2577	True;True;True;True;True;True	19;707;1780;2472;2646;2669	23;905;2259;2260;3147;3375;3401	40;41;1413;1414;3447;3448;4784;4785;5118;5159	41;1413;3447;4784;5118;5159
sp|P05750|RS3_YEAST	sp|P05750|RS3_YEAST	15	15	15	sp|P05750|RS3_YEAST 40S ribosomal protein S3 OS=Saccharomyces cerevisiae (strain ATCC 204508 / S288c) GN=RPS3 PE=1 SV=5	1	15	15	15	54.6	54.6	54.6	26.502	240	240	0	130.82	0.42453	0.67683	14.641	24	8	Leave out requantified	8940000000	6170000000	2770000000				57	23;126;127;373;409;467;692;729;968;1275;1766;2202;2203;2514;2613	True;True;True;True;True;True;True;True;True;True;True;True;True;True;True	23;133;134;386;423;482;710;747;748;996;1311;1826;2279;2280;2603;2708;2709	28;167;168;169;495;548;549;550;627;908;909;952;953;1275;1676;1677;2316;2902;2903;3318;3319;3455;3456;3457	47;268;269;270;271;272;273;274;774;775;866;867;868;869;1004;1005;1419;1420;1421;1483;1484;1485;1486;1970;1971;2586;2587;2588;3525;4416;4417;5033;5034;5035;5240;5241;5242;5243;5244;5245;5246	47;272;273;774;868;1005;1421;1484;1971;2586;3525;4416;4417;5035;5242		64;65			105;127
sp|P05755|RS9B_YEAST	sp|P05755|RS9B_YEAST	15	1	1	sp|P05755|RS9B_YEAST 40S ribosomal protein S9-B OS=Saccharomyces cerevisiae (strain ATCC 204508 / S288c) GN=RPS9B PE=1 SV=4	1	15	1	1	55.4	8.2	8.2	22.298	195	195	0	15.408	0.46239	0.7256	NaN	1	0	Median	549000000	370000000	179000000				58	821;822;995;1041;1083;1151;1191;1206;1331;1695;1779;1785;2308;2341;2342	False;False;False;True;False;False;False;False;False;False;False;False;False;False;False	842;843;1023;1071;1113;1183;1224;1239;1369;1754;1755;1839;1845;2387;2424;2425	1075;1076;1312;1313;1373;1428;1512;1562;1582;1750;1751;2225;2226;2333;2340;2341;3032;3033;3084;3085	1686;1687;1688;2033;2034;2123;2207;2208;2331;2407;2438;2439;2710;2711;2712;3398;3399;3400;3401;3556;3557;3566;3567;4612;4613;4614;4696;4697;4698	1686;1688;2034;2123;2208;2331;2407;2438;2712;3400;3556;3566;4612;4696;4697		18			147
sp|P05756|RS13_YEAST	sp|P05756|RS13_YEAST	10	10	10	sp|P05756|RS13_YEAST 40S ribosomal protein S13 OS=Saccharomyces cerevisiae (strain ATCC 204508 / S288c) GN=RPS13 PE=1 SV=3	1	10	10	10	64.2	64.2	64.2	17.029	151	151	0	79.943	0.48134	0.75811	7.2986	12	1	Leave out requantified	3980000000	2660000000	1330000000				59	253;719;730;1073;1247;1363;1488;1956;2245;2529	True;True;True;True;True;True;True;True;True;True	261;737;749;1103;1282;1401;1541;2022;2323;2619	331;941;942;954;1414;1415;1416;1638;1639;1790;1961;2573;2954;2955;2956;3341;3342	528;529;530;1468;1469;1470;1487;1488;2183;2184;2185;2186;2525;2526;2527;2766;2767;3012;3913;3914;4493;4494;4495;5068;5069	528;1468;1488;2186;2525;2766;3012;3913;4493;5068
sp|P05759|RS27A_YEAST	sp|P05759|RS27A_YEAST	4	4	2	sp|P05759|RS27A_YEAST Ubiquitin-40S ribosomal protein S31 OS=Saccharomyces cerevisiae (strain ATCC 204508 / S288c) GN=RPS31 PE=1 SV=3	1	4	4	2	30.9	30.9	16.4	17.216	152	152	0	26.438	0.68899	1.0974	34.971	4	0	Leave out requantified	1130000000	674000000	454000000				60	397;985;1175;2176	True;True;True;True	411;1013;1208;2252	529;1302;1541;1542;2867	830;2020;2376;2377;4369;4370	830;2020;2377;4370
sp|P06106|CYSD_YEAST	sp|P06106|CYSD_YEAST	14	14	14	sp|P06106|CYSD_YEAST Homocysteine/cysteine synthase OS=Saccharomyces cerevisiae (strain ATCC 204508 / S288c) GN=MET17 PE=1 SV=3	1	14	14	14	36.5	36.5	36.5	48.671	444	444	0	116.17	0.67504	1.0811	9.2786	16	0	Leave out requantified	3830000000	2260000000	1570000000				61	205;217;307;643;663;814;1018;1168;1169;1343;1644;2181;2533;2576	True;True;True;True;True;True;True;True;True;True;True;True;True;True	213;225;317;660;681;835;1047;1201;1202;1381;1701;2257;2623;2668	276;292;405;406;850;875;1065;1345;1534;1535;1766;2157;2873;3347;3348;3400	432;457;458;639;640;641;642;1326;1327;1365;1366;1655;2083;2365;2366;2367;2368;2729;2730;3300;4378;4379;5076;5077;5078;5079;5157;5158	432;457;641;1326;1365;1655;2083;2366;2367;2729;3300;4378;5078;5157
sp|P06168|ILV5_YEAST	sp|P06168|ILV5_YEAST	1	1	1	sp|P06168|ILV5_YEAST Ketol-acid reductoisomerase, mitochondrial OS=Saccharomyces cerevisiae (strain ATCC 204508 / S288c) GN=ILV5 PE=1 SV=1	1	1	1	1	2.5	2.5	2.5	44.368	395	395	0	6.0294	0.65958	1.0868	NaN	1	1	Median	18765000	11189000	7577000				62	567	TRUE	584	754	1193	1193
sp|P06169|PDC1_YEAST;sp|P26263|PDC6_YEAST;sp|P16467|PDC5_YEAST	sp|P06169|PDC1_YEAST	13;2;1	13;2;1	13;2;1	sp|P06169|PDC1_YEAST Pyruvate decarboxylase isozyme 1 OS=Saccharomyces cerevisiae (strain ATCC 204508 / S288c) GN=PDC1 PE=1 SV=7	3	13	13	13	33.7	33.7	33.7	61.495	563	563;563;563	0	132.04	0.4416	0.70135	18.338	15	4	Leave out requantified	934000000	639000000	294000000				63	759;1035;1237;1286;1370;1435;1464;1540;1582;2196;2241;2283;2497	True;True;True;True;True;True;True;True;True;True;True;True;True	780;1065;1271;1322;1408;1480;1515;1516;1595;1638;2273;2319;2362;2586	992;1366;1623;1624;1691;1692;1797;1885;1931;1932;2024;2077;2894;2895;2948;3003;3297	1541;2115;2503;2504;2505;2506;2609;2610;2776;2777;2900;2966;2967;3110;3111;3191;4406;4407;4483;4564;5005	1541;2115;2505;2610;2777;2900;2966;3110;3191;4407;4483;4564;5005		66;67;68;69;70;71;72			43;128;138;247;314;535;539
sp|P06367|RS14A_YEAST;sp|P39516|RS14B_YEAST	sp|P06367|RS14A_YEAST;sp|P39516|RS14B_YEAST	11;10	11;10	11;10	sp|P06367|RS14A_YEAST 40S ribosomal protein S14-A OS=Saccharomyces cerevisiae (strain ATCC 204508 / S288c) GN=RPS14A PE=1 SV=5;sp|P39516|RS14B_YEAST 40S ribosomal protein S14-B OS=Saccharomyces cerevisiae (strain ATCC 204508 / S288c) GN=RPS14B PE=1 SV=2	2	11	11	11	57.7	57.7	57.7	14.536	137	137;138	0	104.52	0.58675	0.9255	6.6402	17	3	Leave out requantified	5720000000	3440000000	2270000000				64	32;239;270;321;560;876;877;1967;2151;2198;2359	True;True;True;True;True;True;True;True;True;True;True	32;33;247;279;332;575;898;899;2034;2227;2275;2444	38;39;40;316;354;429;430;743;1148;1149;2588;2589;2832;2833;2897;2898;3112	58;59;60;61;62;63;504;566;567;674;675;676;1176;1780;1781;1782;3945;3946;3947;4320;4321;4410;4411;4412;4735;4736	60;504;566;675;1176;1780;1782;3945;4321;4412;4736		73			61
sp|P06634|DED1_YEAST;sp|P24784|DBP1_YEAST	sp|P06634|DED1_YEAST	23;5	23;5	22;4	sp|P06634|DED1_YEAST ATP-dependent RNA helicase DED1 OS=Saccharomyces cerevisiae (strain ATCC 204508 / S288c) GN=DED1 PE=1 SV=2	2	23	23	22	49	49	47.2	65.552	604	604;617	0	243.2	0.53386	0.85316	8.4856	29	6	Leave out requantified	5960000000	2420000000	3530000000				65	25;61;72;256;306;361;469;657;691;826;999;1055;1298;1423;1445;1573;1870;2004;2127;2338;2396;2568;2604	True;True;True;True;True;True;True;True;True;True;True;True;True;True;True;True;True;True;True;True;True;True;True	25;63;76;264;265;316;374;484;675;709;847;1027;1085;1334;1466;1491;1492;1629;1934;2074;2201;2421;2482;2659;2699	30;76;94;334;335;404;479;480;630;631;869;907;1081;1082;1083;1317;1391;1705;1870;1871;1902;1903;1904;2065;2458;2459;2639;2796;3080;3160;3161;3389;3441	49;126;127;154;155;534;535;536;537;538;539;637;638;747;748;749;750;751;1008;1009;1355;1356;1417;1418;1693;1694;1695;2041;2149;2626;2879;2880;2881;2926;2927;2928;2929;3175;3176;3741;3742;3743;4026;4262;4263;4688;4689;4803;4804;4805;5139;5140;5219	49;126;154;537;637;749;1009;1355;1418;1694;2041;2149;2626;2881;2928;3175;3742;4026;4262;4688;4803;5139;5219		74;75;76;77;78;79;80;81;82			183;231;311;314;329;411;421;533;534
sp|P06780|RHO1_YEAST	sp|P06780|RHO1_YEAST	4	4	4	sp|P06780|RHO1_YEAST GTP-binding protein RHO1 OS=Saccharomyces cerevisiae (strain ATCC 204508 / S288c) GN=RHO1 PE=1 SV=3	1	4	4	4	18.2	18.2	18.2	23.152	209	209	0	29.138	0.61521	0.99322	2.2598	5	1	Leave out requantified	499000000	315000000	184000000				66	559;1395;1503;1984	True;True;True;True	574;1436;1557;2052	742;1829;1979;2611;2612	1174;1175;2819;2820;3035;3981;3982;3983	1175;2819;3035;3983
sp|P06782|SNF1_YEAST	sp|P06782|SNF1_YEAST	2	2	2	sp|P06782|SNF1_YEAST Carbon catabolite-derepressing protein kinase OS=Saccharomyces cerevisiae (strain ATCC 204508 / S288c) GN=SNF1 PE=1 SV=1	1	2	2	2	3.5	3.5	3.5	72.045	633	633	0	14.18	0.72314	1.1859	NaN	1	0	Median	14868000	7718900	7148700				67	140;1424	True;True	148;1467	188;1872	302;2882	302;2882		83;84			441;482
sp|P06787|CALM_YEAST	sp|P06787|CALM_YEAST	2	2	2	sp|P06787|CALM_YEAST Calmodulin OS=Saccharomyces cerevisiae (strain ATCC 204508 / S288c) GN=CMD1 PE=1 SV=1	1	2	2	2	22.4	22.4	22.4	16.135	147	147	0	20.707	0.48405	0.77275	38.104	2	1	Median	93899000	66815000	27084000				68	572;1953	True;True	589;2019	760;2569	1199;3907	1199;3907
sp|P07143|CY1_YEAST	sp|P07143|CY1_YEAST	3	3	3	sp|P07143|CY1_YEAST Cytochrome c1, heme protein, mitochondrial OS=Saccharomyces cerevisiae (strain ATCC 204508 / S288c) GN=CYT1 PE=1 SV=1	1	3	3	3	15.5	15.5	15.5	34.054	309	309	0	21.585	0.59169	0.95558	20.753	3	0	Leave out requantified	89113000	51640000	37473000				69	17;1563;2180	True;True;True	17;1618;2256	21;2050;2872	37;38;3146;4377	37;3146;4377		85			128
sp|P07149|FAS1_YEAST	sp|P07149|FAS1_YEAST	10	10	10	sp|P07149|FAS1_YEAST Fatty acid synthase subunit beta OS=Saccharomyces cerevisiae (strain ATCC 204508 / S288c) GN=FAS1 PE=1 SV=2	1	10	10	10	8.1	8.1	8.1	228.69	2051	2051	0	89.143	0.66393	1.0762	32.335	10	1	Leave out requantified	361000000	207000000	154000000				70	87;110;293;1021;1280;1403;1436;2177;2260;2405	True;True;True;True;True;True;True;True;True;True	92;117;302;1050;1316;1445;1481;2253;2338;2492	114;147;388;1348;1683;1840;1886;2868;2973;3177	185;238;239;615;2087;2597;2836;2901;4371;4523;4829	185;238;615;2087;2597;2836;2901;4371;4523;4829		86			1359
sp|P07244|PUR2_YEAST	sp|P07244|PUR2_YEAST	1	1	1	sp|P07244|PUR2_YEAST Bifunctional purine biosynthetic protein ADE5,7 OS=Saccharomyces cerevisiae (strain ATCC 204508 / S288c) GN=ADE5,7 PE=1 SV=1	1	1	1	1	1.1	1.1	1.1	86.067	802	802	0	6.1698	0.44679	0.72956	NaN	1	0	Median	14211000	10667000	3544300				71	1166	TRUE	1199	1532	2363	2363
sp|P07249|ARGR1_YEAST	sp|P07249|ARGR1_YEAST	1	1	1	sp|P07249|ARGR1_YEAST Arginine metabolism regulation protein I OS=Saccharomyces cerevisiae (strain ATCC 204508 / S288c) GN=ARG80 PE=1 SV=2	1	1	1	1	5.6	5.6	5.6	19.487	177	177	0	7.4399	0.62028	0.98939	NaN	1	0	Median	5934700	3589000	2345800				72	340	TRUE	352	456	718;719	719
sp|P07251|ATPA_YEAST	sp|P07251|ATPA_YEAST	16	16	16	sp|P07251|ATPA_YEAST ATP synthase subunit alpha, mitochondrial OS=Saccharomyces cerevisiae (strain ATCC 204508 / S288c) GN=ATP1 PE=1 SV=5	1	16	16	16	32.1	32.1	32.1	58.607	545	545	0	126.32	0.53226	0.85731	8.8676	18	4	Leave out requantified	1660000000	1060000000	605000000				73	479;481;551;744;791;801;895;1209;1709;1791;2039;2087;2126;2337;2362;2503	True;True;True;True;True;True;True;True;True;True;True;True;True;True;True;True	494;496;566;765;812;822;917;1242;1769;1851;2110;2159;2200;2420;2447;2592	642;644;733;974;1037;1049;1174;1586;2243;2350;2685;2747;2795;3078;3079;3117;3304;3305	1029;1031;1032;1163;1515;1516;1610;1627;1819;2444;3424;3582;4103;4104;4191;4260;4261;4685;4686;4687;4746;5014;5015;5016	1029;1031;1163;1516;1610;1627;1819;2444;3424;3582;4104;4191;4261;4685;4746;5016		87			263
sp|P07253|CBP6_YEAST	sp|P07253|CBP6_YEAST	5	5	5	sp|P07253|CBP6_YEAST Cytochrome B pre-mRNA-processing protein 6 OS=Saccharomyces cerevisiae (strain ATCC 204508 / S288c) GN=CBP6 PE=1 SV=1	1	5	5	5	29	29	29	18.678	162	162	0	34.103	0.18843	0.3021	46.306	5	3	Median	195000000	150000000	44811000				74	656;1402;1418;2014;2218	True;True;True;True;True	674;1444;1460;2085;2295	868;1839;1860;2654;2920	1354;2835;2865;4045;4440	1354;2835;2865;4045;4440
sp|P07259|PYR1_YEAST;sp|P03965|CARB_YEAST	sp|P07259|PYR1_YEAST	36;2	36;2	36;2	sp|P07259|PYR1_YEAST Protein URA2 OS=Saccharomyces cerevisiae (strain ATCC 204508 / S288c) GN=URA2 PE=1 SV=5	2	36	36	36	18.7	18.7	18.7	245.04	2214	2214;1118	0	274.3	0.56494	0.91431	13.709	36	13	Leave out requantified	1650000000	996000000	652000000				75	91;183;331;413;431;447;477;495;558;576;618;824;944;970;1008;1010;1024;1174;1226;1274;1357;1374;1500;1754;1807;1893;1975;2064;2152;2322;2378;2423;2441;2449;2474;2488	True;True;True;True;True;True;True;True;True;True;True;True;True;True;True;True;True;True;True;True;True;True;True;True;True;True;True;True;True;True;True;True;True;True;True;True	96;191;343;427;446;462;492;510;573;593;635;845;968;998;1037;1039;1053;1207;1260;1310;1395;1413;1554;1814;1867;1958;2043;2136;2228;2405;2464;2510;2528;2536;2563;2577	118;249;445;555;579;601;640;662;741;765;817;1079;1238;1278;1330;1331;1334;1351;1540;1609;1674;1675;1783;1804;1976;2301;2372;2490;2598;2717;2834;3058;3137;3204;3225;3234;3267;3284	190;393;702;703;882;917;955;956;1027;1054;1173;1205;1271;1691;1916;1974;2062;2063;2064;2069;2091;2092;2375;2483;2484;2584;2585;2755;2786;3031;3505;3612;3790;3960;4147;4322;4653;4772;4869;4897;4908;4909;4958;4959;4987	190;393;703;882;917;955;1027;1054;1173;1205;1271;1691;1916;1974;2062;2069;2092;2375;2484;2585;2755;2786;3031;3505;3612;3790;3960;4147;4322;4653;4772;4869;4897;4908;4958;4987		88;89;90;91			1088;1290;1947;2010
sp|P07264|LEUC_YEAST	sp|P07264|LEUC_YEAST	50	50	50	sp|P07264|LEUC_YEAST 3-isopropylmalate dehydratase OS=Saccharomyces cerevisiae (strain ATCC 204508 / S288c) GN=LEU1 PE=1 SV=3	1	50	50	50	59.3	59.3	59.3	85.793	779	779	0	323.31	0.6001	0.94781	9.5532	91	5	Leave out requantified	101000000000	62800000000	37800000000				76	69;105;143;209;210;267;322;377;378;419;432;466;475;476;725;751;805;832;940;1102;1156;1157;1178;1186;1187;1253;1358;1466;1528;1623;1624;1632;1653;1679;1796;1797;1802;1836;1837;1887;1918;2161;2168;2291;2292;2320;2321;2326;2489;2596	True;True;True;True;True;True;True;True;True;True;True;True;True;True;True;True;True;True;True;True;True;True;True;True;True;True;True;True;True;True;True;True;True;True;True;True;True;True;True;True;True;True;True;True;True;True;True;True;True;True	71;72;110;111;151;217;218;276;333;390;391;392;433;434;447;481;490;491;743;772;826;853;964;1133;1188;1189;1190;1211;1219;1220;1288;1396;1518;1583;1680;1681;1689;1710;1737;1738;1856;1857;1862;1897;1898;1899;1952;1983;2237;2244;2370;2371;2401;2402;2403;2404;2409;2578;2690	87;88;89;90;134;135;136;137;191;192;280;281;282;283;350;351;431;502;503;504;505;506;507;562;563;564;580;581;625;626;638;639;948;983;1054;1055;1091;1092;1093;1232;1452;1453;1517;1518;1519;1520;1521;1522;1546;1556;1557;1558;1646;1647;1784;1785;1935;1936;1937;2009;2134;2135;2136;2145;2168;2169;2204;2205;2355;2356;2357;2358;2359;2360;2366;2413;2414;2415;2416;2417;2483;2525;2526;2845;2846;2857;3013;30…	141;142;143;144;145;146;147;148;217;218;219;220;221;222;223;224;305;306;307;308;438;439;440;441;442;443;444;445;561;562;677;787;788;789;790;791;792;793;794;795;796;892;893;894;895;896;918;919;920;921;1000;1001;1002;1003;1023;1024;1025;1026;1477;1478;1528;1637;1638;1639;1640;1706;1707;1708;1709;1710;1908;2245;2246;2247;2338;2339;2340;2341;2342;2343;2344;2345;2346;2347;2348;2349;2383;2384;2396;2397…	144;217;308;442;443;562;677;788;791;894;918;1001;1023;1025;1477;1528;1639;1710;1908;2247;2342;2348;2383;2397;2400;2543;2759;2974;3092;3268;3274;3285;3320;3372;3589;3595;3604;3681;3686;3778;3839;4340;4358;4583;4584;4644;4646;4662;4988;5201		92;93;94;95;96;97;98;99;100	1;2;35		113;230;232;235;245;339;388;427;545	488;494;495
sp|P07281|RS19B_YEAST;sp|P07280|RS19A_YEAST	sp|P07281|RS19B_YEAST;sp|P07280|RS19A_YEAST	13;13	13;13	13;13	sp|P07281|RS19B_YEAST 40S ribosomal protein S19-B OS=Saccharomyces cerevisiae (strain ATCC 204508 / S288c) GN=RPS19B PE=1 SV=2;sp|P07280|RS19A_YEAST 40S ribosomal protein S19-A OS=Saccharomyces cerevisiae (strain ATCC 204508 / S288c) GN=RPS19A PE=1 SV=2	2	13	13	13	70.8	70.8	70.8	15.891	144	144;144	0	137.1	0.60467	0.95997	4.7633	19	2	Leave out requantified	16000000000	9750000000	6230000000				77	352;819;820;841;898;1108;1124;1205;1683;1775;2226;2227;2388	True;True;True;True;True;True;True;True;True;True;True;True;True	364;840;841;862;920;1140;1156;1238;1742;1835;2303;2304;2305;2474	468;1072;1073;1074;1104;1105;1177;1178;1460;1482;1580;1581;2210;2211;2328;2930;2931;2932;2933;3149;3150	734;735;1681;1682;1683;1684;1685;1722;1723;1824;1825;1826;1827;1828;1829;2256;2287;2288;2434;2435;2436;2437;3377;3378;3379;3380;3543;3544;3545;3546;3547;3548;4453;4454;4455;4456;4457;4458;4459;4460;4461;4788;4789;4790;4791	735;1681;1684;1722;1829;2256;2288;2437;3379;3546;4456;4461;4790		101			45
sp|P07283|PMM_YEAST	sp|P07283|PMM_YEAST	12	12	12	sp|P07283|PMM_YEAST Phosphomannomutase OS=Saccharomyces cerevisiae (strain ATCC 204508 / S288c) GN=SEC53 PE=1 SV=1	1	12	12	12	46.9	46.9	46.9	29.063	254	254	0	123.61	0.54655	0.87329	6.9501	14	3	Leave out requantified	1490000000	939000000	552000000				78	226;468;662;957;1383;1384;1490;1882;2140;2186;2264;2566	True;True;True;True;True;True;True;True;True;True;True;True	234;483;680;982;1424;1425;1543;1947;2215;2262;2342;2657	301;628;629;874;1254;1816;1817;1963;1964;2478;2815;2816;2878;2978;2979;3387	472;473;1006;1007;1364;1938;2801;2802;3014;3015;3016;3770;3771;4294;4295;4296;4385;4531;4532;5136;5137	472;1007;1364;1938;2801;2802;3014;3770;4296;4385;4532;5136		102			219
sp|P07342|ILVB_YEAST	sp|P07342|ILVB_YEAST	6	6	6	sp|P07342|ILVB_YEAST Acetolactate synthase catalytic subunit, mitochondrial OS=Saccharomyces cerevisiae (strain ATCC 204508 / S288c) GN=ILV2 PE=1 SV=1	1	6	6	6	12.4	12.4	12.4	74.936	687	687	0	59.909	0.51262	0.82074	17.25	7	2	Leave out requantified	601000000	379000000	222000000				79	6;155;163;1146;1781;2234	True;True;True;True;True;True	6;163;171;1178;1841;2312	7;207;219;220;1507;2335;2941	12;13;336;352;353;354;2325;3559;4473;4474	12;336;352;2325;3559;4473		103;104			286;612
sp|P07560|SEC4_YEAST;sp|Q99260|YPT6_YEAST	sp|P07560|SEC4_YEAST	5;1	5;1	5;1	sp|P07560|SEC4_YEAST Ras-related protein SEC4 OS=Saccharomyces cerevisiae (strain ATCC 204508 / S288c) GN=SEC4 PE=1 SV=1	2	5	5	5	30.7	30.7	30.7	23.505	215	215;215	0	34.701	0.57941	0.93758	19.877	5	1	Leave out requantified	118000000	77669000	40575000				80	478;949;1327;1495;2256	True;True;True;True;True	493;973;1365;1548;2334	641;1243;1744;1745;1969;2969	1028;1922;2704;2705;3022;4518	1028;1922;2704;3022;4518
sp|P07703|RPAC1_YEAST	sp|P07703|RPAC1_YEAST	1	1	1	sp|P07703|RPAC1_YEAST DNA-directed RNA polymerases I and III subunit RPAC1 OS=Saccharomyces cerevisiae (strain ATCC 204508 / S288c) GN=RPC40 PE=1 SV=1	1	1	1	1	4.2	4.2	4.2	37.686	335	335	0	8.2592	0.38981	0.62999	NaN	1	1	Median	45269000	31883000	13386000				81	2458	TRUE	2546	3247	4927	4927
sp|P07991|OAT_YEAST	sp|P07991|OAT_YEAST	1	1	1	sp|P07991|OAT_YEAST Ornithine aminotransferase OS=Saccharomyces cerevisiae (strain ATCC 204508 / S288c) GN=CAR2 PE=1 SV=2	1	1	1	1	5	5	5	46.085	424	424	0	8.7383	0.37768	0.61187	12.644	2	0	Median	18510000	12914000	5595600				82	1159	TRUE	1192	1524;1525	2351;2352	2352
sp|P08456|PSS_YEAST	sp|P08456|PSS_YEAST	1	1	1	sp|P08456|PSS_YEAST CDP-diacylglycerol--serine O-phosphatidyltransferase OS=Saccharomyces cerevisiae (strain ATCC 204508 / S288c) GN=CHO1 PE=1 SV=3	1	1	1	1	3.6	3.6	3.6	30.804	276	276	0	5.9562	0.54972	0.87632	NaN	1	0	Median	126000000	82156000	44027000				83	637	TRUE	654	842	1306;1307	1306
sp|P08518|RPB2_YEAST	sp|P08518|RPB2_YEAST	16	16	16	sp|P08518|RPB2_YEAST DNA-directed RNA polymerase II subunit RPB2 OS=Saccharomyces cerevisiae (strain ATCC 204508 / S288c) GN=RPB2 PE=1 SV=2	1	16	16	16	16.2	16.2	16.2	138.75	1224	1224	0	127.49	0.62573	1.012	14.592	14	4	Leave out requantified	925000000	635000000	290000000				84	18;76;263;538;615;774;1293;1426;1611;1808;2027;2236;2267;2379;2438;2528	True;True;True;True;True;True;True;True;True;True;True;True;True;True;True;True	18;81;272;553;632;795;1329;1469;1668;1868;2098;2314;2345;2465;2525;2618	22;101;344;714;814;1013;1700;1874;2119;2373;2670;2943;2983;3138;3222;3340	39;163;164;551;1134;1135;1268;1576;2621;2884;2885;3247;3613;4071;4476;4536;4773;4892;5067	39;163;551;1135;1268;1576;2621;2884;3247;3613;4071;4476;4536;4773;4892;5067		105;106;107;108;109			773;789;792;1138;1152
sp|P09064|IF2B_YEAST	sp|P09064|IF2B_YEAST	6	6	6	sp|P09064|IF2B_YEAST Eukaryotic translation initiation factor 2 subunit beta OS=Saccharomyces cerevisiae (strain ATCC 204508 / S288c) GN=SUI3 PE=1 SV=2	1	6	6	6	33	33	33	31.574	285	285	0	45.132	0.52888	0.83375	30.511	6	1	Leave out requantified	261000000	146000000	116000000				85	430;1711;1997;2052;2139;2190	True;True;True;True;True;True	445;1771;2066;2124;2214;2266	578;2245;2630;2702;2814;2883	916;3427;4012;4013;4127;4292;4293;4390	916;3427;4013;4127;4292;4390		110			222
sp|P09436|SYIC_YEAST	sp|P09436|SYIC_YEAST	4	4	4	sp|P09436|SYIC_YEAST Isoleucine--tRNA ligase, cytoplasmic OS=Saccharomyces cerevisiae (strain ATCC 204508 / S288c) GN=ILS1 PE=1 SV=1	1	4	4	4	3.7	3.7	3.7	122.98	1072	1072	0	27.477	0.5375	0.88534	14.497	3	2	Median	114000000	71707000	42708000				86	365;753;2050;2418	True;True;True;True	378;774;2122;2505	485;985;2700;3197	759;1531;4125;4859	759;1531;4125;4859
sp|P09733|TBA1_YEAST;sp|P09734|TBA3_YEAST	sp|P09733|TBA1_YEAST;sp|P09734|TBA3_YEAST	5;3	5;3	5;3	sp|P09733|TBA1_YEAST Tubulin alpha-1 chain OS=Saccharomyces cerevisiae (strain ATCC 204508 / S288c) GN=TUB1 PE=1 SV=2;sp|P09734|TBA3_YEAST Tubulin alpha-3 chain OS=Saccharomyces cerevisiae (strain ATCC 204508 / S288c) GN=TUB3 PE=1 SV=1	2	5	5	5	12.8	12.8	12.8	49.799	447	447;445	0	39.268	0.57591	0.91615	24.396	5	2	Leave out requantified	229000000	137000000	91340000				87	98;304;398;402;2257	True;True;True;True;True	103;314;412;416;2335	126;402;530;536;2970	206;635;831;840;841;4519	206;635;831;841;4519
sp|P09798|CDC16_YEAST	sp|P09798|CDC16_YEAST	27	27	27	sp|P09798|CDC16_YEAST Anaphase-promoting complex subunit CDC16 OS=Saccharomyces cerevisiae (strain ATCC 204508 / S288c) GN=CDC16 PE=1 SV=1	1	27	27	27	33.3	33.3	33.3	94.991	840	840	0	298.37	0.70062	1.1265	13.175	38	1	Leave out requantified	6250000000	3670000000	2580000000				88	83;196;268;301;344;345;381;444;588;1092;1145;1300;1317;1430;1513;1596;1910;1947;1954;1960;2007;2069;2193;2206;2295;2547;2560	True;True;True;True;True;True;True;True;True;True;True;True;True;True;True;True;True;True;True;True;True;True;True;True;True;True;True	88;204;277;310;356;357;395;459;605;1122;1177;1336;1355;1473;1474;1567;1568;1652;1653;1975;2013;2020;2026;2077;2141;2269;2283;2374;2637;2650	109;264;352;397;460;461;512;597;598;782;1439;1440;1506;1707;1734;1878;1879;1992;1993;2096;2097;2515;2516;2560;2561;2570;2571;2577;2578;2579;2643;2723;2724;2887;2888;2906;3018;3363;3379	177;411;412;563;564;627;724;725;804;949;950;1225;2227;2228;2229;2323;2324;2628;2629;2674;2675;2890;2891;2892;3055;3056;3057;3215;3216;3217;3825;3826;3827;3828;3897;3898;3899;3908;3909;3910;3911;3919;3920;3921;3922;4030;4031;4155;4156;4157;4158;4395;4396;4397;4398;4420;4592;4593;5102;5103;5124;5125	177;411;563;627;724;725;804;950;1225;2228;2323;2628;2674;2891;3055;3215;3826;3898;3911;3920;4030;4155;4396;4420;4592;5103;5124		111;112;113;114;115;116;117;118;119			114;144;149;242;245;357;398;773;797
sp|Q3E792|RS25A_YEAST;sp|P0C0T4|RS25B_YEAST	sp|Q3E792|RS25A_YEAST;sp|P0C0T4|RS25B_YEAST	5;5	5;5	5;5	sp|Q3E792|RS25A_YEAST 40S ribosomal protein S25-A OS=Saccharomyces cerevisiae (strain ATCC 204508 / S288c) GN=RPS25A PE=1 SV=1;sp|P0C0T4|RS25B_YEAST 40S ribosomal protein S25-B OS=Saccharomyces cerevisiae (strain ATCC 204508 / S288c) GN=RPS25B PE=1 SV=1	2	5	5	5	30.6	30.6	30.6	12.039	108	108;108	0	48.785	0.55467	0.88335	8.4773	9	1	Leave out requantified	1270000000	800000000	471000000				89	0;1;160;161;426	True;True;True;True;True	0;1;168;169;441	0;1;2;213;214;215;216;217;573	0;1;2;3;343;344;345;346;347;348;349;350;909	0;3;345;350;909
sp|Q3E754|RS21B_YEAST;sp|P0C0V8|RS21A_YEAST	sp|Q3E754|RS21B_YEAST;sp|P0C0V8|RS21A_YEAST	5;5	5;5	5;5	sp|Q3E754|RS21B_YEAST 40S ribosomal protein S21-B OS=Saccharomyces cerevisiae (strain ATCC 204508 / S288c) GN=RPS21B PE=1 SV=1;sp|P0C0V8|RS21A_YEAST 40S ribosomal protein S21-A OS=Saccharomyces cerevisiae (strain ATCC 204508 / S288c) GN=RPS21A PE=1 SV=1	2	5	5	5	63.2	63.2	63.2	9.7597	87	87;87	0	50.082	0.53215	0.85138	8.2126	7	0	Leave out requantified	685000000	444000000	242000000				90	27;1165;1429;1626;1992	True;True;True;True;True	27;1198;1472;1683;2061	32;33;1531;1877;2138;2623;2624	51;52;2362;2888;2889;3276;3997;3998	52;2362;2888;3276;3997		120			1
sp|Q3E757|RL11B_YEAST;sp|P0C0W9|RL11A_YEAST	sp|Q3E757|RL11B_YEAST;sp|P0C0W9|RL11A_YEAST	6;6	6;6	6;6	sp|Q3E757|RL11B_YEAST 60S ribosomal protein L11-B OS=Saccharomyces cerevisiae (strain ATCC 204508 / S288c) GN=RPL11B PE=1 SV=3;sp|P0C0W9|RL11A_YEAST 60S ribosomal protein L11-A OS=Saccharomyces cerevisiae (strain ATCC 204508 / S288c) GN=RPL11A PE=1 SV=2	2	6	6	6	24.1	24.1	24.1	19.749	174	174;174	0	52.068	0.61322	0.9692	8.7635	9	0	Leave out requantified	3720000000	2280000000	1440000000				91	38;405;1697;2233;2373;2518	True;True;True;True;True;True	39;419;1757;2311;2459;2607	46;541;542;2229;2230;2940;3130;3131;3326	72;850;851;852;3404;3405;3406;3407;4471;4472;4762;4763;4764;5049;5050	72;852;3405;4472;4763;5050
sp|Q3E7X9|RS28A_YEAST;sp|P0C0X0|RS28B_YEAST	sp|Q3E7X9|RS28A_YEAST;sp|P0C0X0|RS28B_YEAST	1;1	1;1	1;1	sp|Q3E7X9|RS28A_YEAST 40S ribosomal protein S28-A OS=Saccharomyces cerevisiae (strain ATCC 204508 / S288c) GN=RPS28A PE=1 SV=1;sp|P0C0X0|RS28B_YEAST 40S ribosomal protein S28-B OS=Saccharomyces cerevisiae (strain ATCC 204508 / S288c) GN=RPS28B PE=1 SV=1	2	1	1	1	13.4	13.4	13.4	7.5917	67	67;67	0	6.2218	0.33387	0.53885	NaN	1	0	Median	76258000	51100000	25158000				92	2311	TRUE	2390	3037	4621	4621
sp|P0C2H7|RL27B_YEAST;sp|P0C2H6|RL27A_YEAST	sp|P0C2H7|RL27B_YEAST;sp|P0C2H6|RL27A_YEAST	6;6	6;6	6;6	sp|P0C2H7|RL27B_YEAST 60S ribosomal protein L27-B OS=Saccharomyces cerevisiae (strain ATCC 204508 / S288c) GN=RPL27B PE=1 SV=1;sp|P0C2H6|RL27A_YEAST 60S ribosomal protein L27-A OS=Saccharomyces cerevisiae (strain ATCC 204508 / S288c) GN=RPL27A PE=1 SV=1	2	6	6	6	37.5	37.5	37.5	15.505	136	136;136	0	60.257	0.69108	1.0961	14.25	10	0	Leave out requantified	3880000000	2270000000	1620000000				93	1131;2053;2054;2477;2479;2605	True;True;True;True;True;True	1163;2125;2126;2566;2568;2700	1491;2703;2704;2705;3270;3271;3273;3274;3442;3443	2302;4128;4129;4130;4131;4132;4963;4964;4965;4966;4968;4969;4970;4971;5220;5221;5222	2302;4129;4132;4965;4971;5222
sp|P0C2H8|RL31A_YEAST	sp|P0C2H8|RL31A_YEAST	7	7	1	sp|P0C2H8|RL31A_YEAST 60S ribosomal protein L31-A OS=Saccharomyces cerevisiae (strain ATCC 204508 / S288c) GN=RPL31A PE=1 SV=1	1	7	7	1	61.9	61.9	8	12.953	113	113	0	73.298	0.57913	0.94036	6.6328	7	1	Leave out requantified	1330000000	818000000	515000000				94	66;728;1158;1230;1232;1507;1578	True;True;True;True;True;True;True	68;746;1191;1264;1266;1561;1634	84;951;1523;1614;1617;1984;2070;2071	138;1482;2350;2491;2495;2496;3042;3043;3044;3045;3181;3182;3183;3184	138;1482;2350;2491;2496;3044;3182		121			44
sp|P0C2H9|RL31B_YEAST	sp|P0C2H9|RL31B_YEAST	7	1	1	sp|P0C2H9|RL31B_YEAST 60S ribosomal protein L31-B OS=Saccharomyces cerevisiae (strain ATCC 204508 / S288c) GN=RPL31B PE=1 SV=1	1	7	1	1	61.9	8	8	12.967	113	113	0	6.0637	0.54115	0.88011	NaN	1	0	Median	11934000	6315800	5618300				95	66;728;1158;1230;1233;1507;1578	False;False;False;False;True;False;False	68;746;1191;1264;1267;1561;1634	84;951;1523;1614;1618;1984;2070;2071	138;1482;2350;2491;2497;2498;3042;3043;3044;3045;3181;3182;3183;3184	138;1482;2350;2491;2497;3044;3182		122			44
sp|P0CH08|RL401_YEAST;sp|P0CH09|RL402_YEAST;sp|P0CG63|UBI4P_YEAST	sp|P0CH08|RL401_YEAST;sp|P0CH09|RL402_YEAST;sp|P0CG63|UBI4P_YEAST	3;3;2	1;1;0	1;1;0	sp|P0CH08|RL401_YEAST Ubiquitin-60S ribosomal protein L40 OS=Saccharomyces cerevisiae (strain ATCC 204508 / S288c) GN=RPL40A PE=1 SV=1;sp|P0CH09|RL402_YEAST Ubiquitin-60S ribosomal protein L40 OS=Saccharomyces cerevisiae (strain ATCC 204508 / S288c) GN=RPL	3	3	1	1	25	7.8	7.8	14.554	128	128;128;381	0	7.6479	0.6957	1.1457	NaN	1	0	Median	15466000	9439700	6026000				96	234;985;2176	True;False;False	242;1013;2252	310;1302;2867	495;2020;4369;4370	495;2020;4370
sp|P0CS90|HSP77_YEAST;sp|P39987|HSP7E_YEAST	sp|P0CS90|HSP77_YEAST	11;3	11;3	11;3	sp|P0CS90|HSP77_YEAST Heat shock protein SSC1, mitochondrial OS=Saccharomyces cerevisiae (strain ATCC 204508 / S288c) GN=SSC1 PE=1 SV=1	2	11	11	11	20.2	20.2	20.2	70.627	654	654;644	0	88.54	0.36368	0.58561	14.347	11	1	Leave out requantified	614000000	430000000	184000000				97	31;157;251;917;1103;1492;1662;1770;2102;2238;2431	True;True;True;True;True;True;True;True;True;True;True	31;165;259;940;1134;1545;1719;1830;2175;2316;2518	37;209;328;1204;1454;1966;2181;2320;2767;2945;3214	57;338;523;524;1868;1869;2248;3018;3336;3531;4220;4479;4883	57;338;523;1868;2248;3018;3336;3531;4220;4479;4883
sp|P0CX24|RL20B_YEAST;sp|P0CX23|RL20A_YEAST	sp|P0CX24|RL20B_YEAST;sp|P0CX23|RL20A_YEAST	8;8	8;8	8;8	sp|P0CX24|RL20B_YEAST 60S ribosomal protein L20-B OS=Saccharomyces cerevisiae (strain ATCC 204508 / S288c) GN=RPL20B PE=1 SV=1;sp|P0CX23|RL20A_YEAST 60S ribosomal protein L20-A OS=Saccharomyces cerevisiae (strain ATCC 204508 / S288c) GN=RPL20A PE=1 SV=1	2	8	8	8	43.6	43.6	43.6	20.437	172	172;172	0	99.277	0.61542	0.98093	7.84	13	0	Leave out requantified	5480000000	3390000000	2090000000				98	169;578;888;1049;1515;1778;2268;2615	True;True;True;True;True;True;True;True	177;595;910;1079;1570;1838;2346;2347;2711	227;228;767;768;1163;1164;1384;1995;2331;2332;2984;2985;3460	362;363;364;365;1207;1208;1209;1803;1804;1805;2139;3060;3061;3551;3552;3553;3554;3555;4537;4538;4539;5251;5252	364;1209;1805;2139;3060;3551;4537;5251		123			110
sp|P0CX26|RL43B_YEAST;sp|P0CX25|RL43A_YEAST	sp|P0CX26|RL43B_YEAST;sp|P0CX25|RL43A_YEAST	5;5	5;5	5;5	sp|P0CX26|RL43B_YEAST 60S ribosomal protein L43-B OS=Saccharomyces cerevisiae (strain ATCC 204508 / S288c) GN=RPL43B PE=1 SV=1;sp|P0CX25|RL43A_YEAST 60S ribosomal protein L43-A OS=Saccharomyces cerevisiae (strain ATCC 204508 / S288c) GN=RPL43A PE=1 SV=1	2	5	5	5	58.7	58.7	58.7	10.091	92	92;92	0	45.6	0.68117	1.0718	10.521	9	1	Leave out requantified	2510000000	1440000000	1060000000				99	680;1087;1334;2242;2519	True;True;True;True;True	698;1117;1372;2320;2608	894;1432;1433;1754;1755;2949;2950;3327;3328	1396;1397;2217;2218;2219;2716;2717;4484;4485;4486;4487;5051;5052;5053	1397;2218;2717;4485;5051		124			89
sp|P0CX28|RL44B_YEAST;sp|P0CX27|RL44A_YEAST	sp|P0CX28|RL44B_YEAST;sp|P0CX27|RL44A_YEAST	1;1	1;1	1;1	sp|P0CX28|RL44B_YEAST 60S ribosomal protein L42-B OS=Saccharomyces cerevisiae (strain ATCC 204508 / S288c) GN=RPL42B PE=1 SV=1;sp|P0CX27|RL44A_YEAST 60S ribosomal protein L42-A OS=Saccharomyces cerevisiae (strain ATCC 204508 / S288c) GN=RPL42A PE=1 SV=1	2	1	1	1	7.5	7.5	7.5	12.211	106	106;106	0	6.8017	1.0347	1.6461	NaN	1	0	Median	116000000	54933000	61080000				100	811	TRUE	832	1062	1650	1650
sp|P0CX30|RS23B_YEAST;sp|P0CX29|RS23A_YEAST	sp|P0CX30|RS23B_YEAST;sp|P0CX29|RS23A_YEAST	5;5	5;5	5;5	sp|P0CX30|RS23B_YEAST 40S ribosomal protein S23-B OS=Saccharomyces cerevisiae (strain ATCC 204508 / S288c) GN=RPS23B PE=1 SV=1;sp|P0CX29|RS23A_YEAST 40S ribosomal protein S23-A OS=Saccharomyces cerevisiae (strain ATCC 204508 / S288c) GN=RPS23A PE=1 SV=1	2	5	5	5	31	31	31	16.038	145	145;145	0	31.717	0.71504	1.1463	12.962	7	1	Leave out requantified	1530000000	869000000	665000000				101	101;1272;2011;2440;2496	True;True;True;True;True	106;1308;2082;2527;2585	129;1671;1672;2650;3224;3295;3296	211;2578;2579;2580;4041;4895;4896;5002;5003;5004	211;2580;4041;4896;5004
sp|P0CX32|RS24B_YEAST;sp|P0CX31|RS24A_YEAST	sp|P0CX32|RS24B_YEAST;sp|P0CX31|RS24A_YEAST	9;9	9;9	9;9	sp|P0CX32|RS24B_YEAST 40S ribosomal protein S24-B OS=Saccharomyces cerevisiae (strain ATCC 204508 / S288c) GN=RPS24B PE=1 SV=1;sp|P0CX31|RS24A_YEAST 40S ribosomal protein S24-A OS=Saccharomyces cerevisiae (strain ATCC 204508 / S288c) GN=RPS24A PE=1 SV=1	2	9	9	9	57.8	57.8	57.8	15.329	135	135;135	0	68.402	0.6934	1.0923	16.13	10	2	Leave out requantified	2610000000	1420000000	1190000000				102	42;146;262;1064;1121;1682;1832;2046;2204	True;True;True;True;True;True;True;True;True	43;154;271;1094;1153;1741;1893;2118;2281	50;195;343;1403;1477;1478;2209;2407;2408;2695;2904	81;312;549;550;2166;2279;2280;2281;3376;3670;3671;3672;3673;4119;4120;4418	81;312;549;2166;2279;3376;3671;4120;4418
sp|P0CX34|RS30B_YEAST;sp|P0CX33|RS30A_YEAST	sp|P0CX34|RS30B_YEAST;sp|P0CX33|RS30A_YEAST	4;4	4;4	4;4	sp|P0CX34|RS30B_YEAST 40S ribosomal protein S30-B OS=Saccharomyces cerevisiae (strain ATCC 204508 / S288c) GN=RPS30B PE=1 SV=1;sp|P0CX33|RS30A_YEAST 40S ribosomal protein S30-A OS=Saccharomyces cerevisiae (strain ATCC 204508 / S288c) GN=RPS30A PE=1 SV=1	2	4	4	4	41.3	41.3	41.3	7.1184	63	63;63	0	26.516	0.69732	1.1017	13.791	3	1	Median	381000000	215000000	166000000				103	668;1458;1780;2346	True;True;True;True	686;1509;1840;2429	880;1924;1925;2334;3092;3093	1372;1373;2958;2959;3558;4708;4709	1372;2959;3558;4709		125			56
sp|P0CX36|RS4B_YEAST;sp|P0CX35|RS4A_YEAST	sp|P0CX36|RS4B_YEAST;sp|P0CX35|RS4A_YEAST	12;12	12;12	12;12	sp|P0CX36|RS4B_YEAST 40S ribosomal protein S4-B OS=Saccharomyces cerevisiae (strain ATCC 204508 / S288c) GN=RPS4B PE=1 SV=1;sp|P0CX35|RS4A_YEAST 40S ribosomal protein S4-A OS=Saccharomyces cerevisiae (strain ATCC 204508 / S288c) GN=RPS4A PE=1 SV=1	2	12	12	12	49.8	49.8	49.8	29.41	261	261;261	0	92.789	0.45903	0.72612	7.2553	19	4	Leave out requantified	4840000000	3220000000	1610000000				104	329;534;789;806;907;1009;1309;1344;1345;1348;1410;2098	True;True;True;True;True;True;True;True;True;True;True;True	341;549;810;827;929;1038;1346;1382;1383;1386;1452;2170;2171	442;443;710;1034;1035;1056;1187;1188;1332;1333;1722;1767;1768;1772;1773;1849;1850;2761;2762	698;699;700;1126;1127;1606;1607;1608;1641;1642;1841;1842;2065;2066;2067;2068;2655;2656;2731;2732;2733;2739;2740;2741;2849;2850;4213;4214	698;1126;1608;1641;1841;2067;2656;2731;2733;2740;2849;4213		126			87
sp|P0CX38|RS6B_YEAST;sp|P0CX37|RS6A_YEAST	sp|P0CX38|RS6B_YEAST;sp|P0CX37|RS6A_YEAST	12;12	12;12	12;12	sp|P0CX38|RS6B_YEAST 40S ribosomal protein S6-B OS=Saccharomyces cerevisiae (strain ATCC 204508 / S288c) GN=RPS6B PE=1 SV=1;sp|P0CX37|RS6A_YEAST 40S ribosomal protein S6-A OS=Saccharomyces cerevisiae (strain ATCC 204508 / S288c) GN=RPS6A PE=1 SV=1	2	12	12	12	46.6	46.6	46.6	26.996	236	236;236	0	129.45	0.66719	1.0656	12.279	16	0	Leave out requantified	10300000000	6190000000	4150000000				105	374;400;683;699;905;1068;1069;1302;1441;1621;1686;2108	True;True;True;True;True;True;True;True;True;True;True;True	387;414;701;717;927;1098;1099;1338;1486;1678;1745;2181	496;497;532;533;898;918;1185;1408;1409;1410;1709;1894;1895;2131;2214;2773	776;777;778;779;833;834;835;836;1403;1436;1839;2172;2173;2174;2175;2176;2631;2632;2633;2913;2914;3263;3264;3383;3384;4228;4229	779;836;1403;1436;1839;2174;2176;2631;2913;3264;3383;4228		127			1
sp|P0CX40|RS8B_YEAST;sp|P0CX39|RS8A_YEAST	sp|P0CX40|RS8B_YEAST;sp|P0CX39|RS8A_YEAST	10;10	10;10	10;10	sp|P0CX40|RS8B_YEAST 40S ribosomal protein S8-B OS=Saccharomyces cerevisiae (strain ATCC 204508 / S288c) GN=RPS8B PE=1 SV=1;sp|P0CX39|RS8A_YEAST 40S ribosomal protein S8-A OS=Saccharomyces cerevisiae (strain ATCC 204508 / S288c) GN=RPS8A PE=1 SV=1	2	10	10	10	46.5	46.5	46.5	22.489	200	200;200	0	99.156	0.73897	1.184	7.7848	14	3	Leave out requantified	4420000000	2580000000	1840000000				106	14;410;848;884;885;886;1413;1414;1615;1760	True;True;True;True;True;True;True;True;True;True	14;424;869;906;907;908;1455;1456;1672;1820	18;551;552;1112;1113;1159;1160;1161;1853;1854;1855;2124;2125;2309	31;32;870;871;872;873;874;875;876;877;878;879;1731;1732;1733;1734;1796;1797;1798;1799;1800;1801;2856;2857;2858;3253;3254;3255;3515;3516	32;870;1733;1796;1799;1801;2856;2857;3253;3515
sp|P0CX42|RL23B_YEAST;sp|P0CX41|RL23A_YEAST	sp|P0CX42|RL23B_YEAST;sp|P0CX41|RL23A_YEAST	7;7	7;7	7;7	sp|P0CX42|RL23B_YEAST 60S ribosomal protein L23-B OS=Saccharomyces cerevisiae (strain ATCC 204508 / S288c) GN=RPL23B PE=1 SV=1;sp|P0CX41|RL23A_YEAST 60S ribosomal protein L23-A OS=Saccharomyces cerevisiae (strain ATCC 204508 / S288c) GN=RPL23A PE=1 SV=1	2	7	7	7	54.7	54.7	54.7	14.473	137	137;137	0	61.386	0.38618	0.61117	9.5105	13	1	Leave out requantified	3610000000	2580000000	1030000000				107	395;1000;1071;1312;1562;2279;2397	True;True;True;True;True;True;True	409;1028;1029;1101;1349;1617;2358;2483;2484	527;1318;1319;1320;1321;1412;1725;1726;2048;2049;2999;3162;3163;3164	825;826;827;828;2042;2043;2044;2045;2046;2047;2048;2049;2050;2051;2179;2180;2181;2659;2660;2661;2662;3143;3144;3145;4560;4806;4807;4808;4809	827;2042;2181;2659;3145;4560;4808		128;129;130;131			23;57;59;74
sp|P0CX44|RL1B_YEAST;sp|P0CX43|RL1A_YEAST	sp|P0CX44|RL1B_YEAST;sp|P0CX43|RL1A_YEAST	9;9	9;9	9;9	sp|P0CX44|RL1B_YEAST 60S ribosomal protein L1-B OS=Saccharomyces cerevisiae (strain ATCC 204508 / S288c) GN=RPL1B PE=1 SV=1;sp|P0CX43|RL1A_YEAST 60S ribosomal protein L1-A OS=Saccharomyces cerevisiae (strain ATCC 204508 / S288c) GN=RPL1A PE=1 SV=1	2	9	9	9	35.5	35.5	35.5	24.485	217	217;217	0	69.026	0.68102	1.0827	6.0288	14	3	Leave out requantified	5110000000	3440000000	1670000000				108	64;640;1015;1270;1627;1827;1828;2008;2572	True;True;True;True;True;True;True;True;True	66;657;1044;1306;1684;1888;1889;2078;2079;2664	80;81;82;846;847;1341;1342;1669;2139;2402;2403;2644;2645;2646;3395	133;134;135;136;1320;1321;1322;1323;2078;2079;2576;3277;3278;3661;3662;3663;3664;4032;4033;4034;4035;5148	136;1322;2078;2576;3277;3661;3664;4035;5148		132;133			85;210
sp|P0CX46|RL2B_YEAST;sp|P0CX45|RL2A_YEAST	sp|P0CX46|RL2B_YEAST;sp|P0CX45|RL2A_YEAST	16;16	16;16	16;16	sp|P0CX46|RL2B_YEAST 60S ribosomal protein L2-B OS=Saccharomyces cerevisiae (strain ATCC 204508 / S288c) GN=RPL2B PE=1 SV=1;sp|P0CX45|RL2A_YEAST 60S ribosomal protein L2-A OS=Saccharomyces cerevisiae (strain ATCC 204508 / S288c) GN=RPL2A PE=1 SV=1	2	16	16	16	65	65	65	27.408	254	254;254	0	138.6	0.68123	1.0809	11.694	23	4	Leave out requantified	8380000000	4940000000	3440000000				109	65;171;173;412;681;776;783;1050;1066;1122;1694;2158;2298;2358;2435;2471	True;True;True;True;True;True;True;True;True;True;True;True;True;True;True;True	67;179;181;426;699;797;804;1080;1096;1154;1753;2234;2377;2443;2522;2560	83;231;232;234;235;554;895;896;1016;1026;1027;1385;1405;1479;1480;2223;2224;2841;2842;3021;3110;3111;3219;3264	137;368;369;370;372;373;374;375;881;1398;1399;1400;1401;1579;1594;1595;1596;2140;2141;2168;2282;2283;2284;3396;3397;4332;4333;4334;4335;4596;4733;4734;4889;4952;4953	137;370;372;881;1400;1579;1594;2140;2168;2282;3397;4334;4596;4733;4889;4953		134			204
sp|P0CX48|RS11B_YEAST;sp|P0CX47|RS11A_YEAST	sp|P0CX48|RS11B_YEAST;sp|P0CX47|RS11A_YEAST	10;10	10;10	10;10	sp|P0CX48|RS11B_YEAST 40S ribosomal protein S11-B OS=Saccharomyces cerevisiae (strain ATCC 204508 / S288c) GN=RPS11B PE=1 SV=1;sp|P0CX47|RS11A_YEAST 40S ribosomal protein S11-A OS=Saccharomyces cerevisiae (strain ATCC 204508 / S288c) GN=RPS11A PE=1 SV=1	2	10	10	10	59.6	59.6	59.6	17.749	156	156;156	0	85.369	0.66351	1.0413	5.9214	13	1	Leave out requantified	5890000000	3530000000	2360000000				110	222;244;958;1484;1618;1721;2026;2071;2072;2434	True;True;True;True;True;True;True;True;True;True	230;252;983;1537;1675;1781;2097;2143;2144;2521	297;321;1255;1256;1957;2128;2261;2668;2669;2726;2727;3217;3218	465;466;510;511;1939;1940;1941;3007;3259;3260;3449;4067;4068;4069;4070;4160;4161;4886;4887;4888	465;510;1941;3007;3259;3449;4069;4160;4161;4888
sp|P0CX50|RL18B_YEAST;sp|P0CX49|RL18A_YEAST	sp|P0CX50|RL18B_YEAST;sp|P0CX49|RL18A_YEAST	10;10	10;10	10;10	sp|P0CX50|RL18B_YEAST 60S ribosomal protein L18-B OS=Saccharomyces cerevisiae (strain ATCC 204508 / S288c) GN=RPL18B PE=1 SV=1;sp|P0CX49|RL18A_YEAST 60S ribosomal protein L18-A OS=Saccharomyces cerevisiae (strain ATCC 204508 / S288c) GN=RPL18A PE=1 SV=1	2	10	10	10	44.1	44.1	44.1	20.563	186	186;186	0	64.576	0.65587	1.0445	7.5795	12	3	Leave out requantified	3180000000	1950000000	1230000000				111	62;746;812;972;1419;1792;1845;2093;2240;2261	True;True;True;True;True;True;True;True;True;True	64;767;833;1000;1461;1852;1909;2165;2318;2339	77;977;1063;1281;1282;1861;1862;2351;2430;2754;2947;2974	128;1519;1651;1652;1653;1978;1979;1980;1981;1982;2866;2867;2868;3583;3584;3703;4201;4481;4482;4524;4525	128;1519;1653;1981;2866;3584;3703;4201;4481;4524		135			155
sp|P0CX52|RS16B_YEAST;sp|P0CX51|RS16A_YEAST	sp|P0CX52|RS16B_YEAST;sp|P0CX51|RS16A_YEAST	12;12	12;12	12;12	sp|P0CX52|RS16B_YEAST 40S ribosomal protein S16-B OS=Saccharomyces cerevisiae (strain ATCC 204508 / S288c) GN=RPS16B PE=1 SV=1;sp|P0CX51|RS16A_YEAST 40S ribosomal protein S16-A OS=Saccharomyces cerevisiae (strain ATCC 204508 / S288c) GN=RPS16A PE=1 SV=1	2	12	12	12	72	72	72	15.847	143	143;143	0	104.04	0.38393	0.61512	6.8236	21	5	Leave out requantified	5870000000	4110000000	1760000000				112	54;653;731;1817;1825;2171;2402;2454;2487;2608;2609;2610	True;True;True;True;True;True;True;True;True;True;True;True	56;671;750;1878;1886;2247;2489;2541;2576;2703;2704;2705	67;864;865;955;2388;2389;2399;2400;2861;2862;3172;3173;3174;3240;3241;3283;3447;3448;3449;3450;3451	111;112;1349;1350;1489;3637;3638;3639;3640;3655;3656;3657;3658;4362;4363;4821;4822;4823;4824;4825;4826;4918;4919;4920;4984;4985;4986;5227;5228;5229;5230;5231;5232;5233;5234	111;1349;1489;3637;3655;4363;4822;4920;4984;5229;5231;5233
sp|P0CX54|RL12B_YEAST;sp|P0CX53|RL12A_YEAST	sp|P0CX54|RL12B_YEAST;sp|P0CX53|RL12A_YEAST	8;8	8;8	8;8	sp|P0CX54|RL12B_YEAST 60S ribosomal protein L12-B OS=Saccharomyces cerevisiae (strain ATCC 204508 / S288c) GN=RPL12B PE=1 SV=1;sp|P0CX53|RL12A_YEAST 60S ribosomal protein L12-A OS=Saccharomyces cerevisiae (strain ATCC 204508 / S288c) GN=RPL12A PE=1 SV=1	2	8	8	8	57.6	57.6	57.6	17.822	165	165;165	0	72.924	0.2473	0.39167	22.232	10	1	Leave out requantified	2500000000	1980000000	520000000				113	200;449;904;1119;1577;1650;1651;2155	True;True;True;True;True;True;True;True	208;464;926;1151;1633;1707;1708;2231	268;269;603;1184;1474;1475;2069;2164;2165;2166;2838	416;417;418;959;960;1837;1838;2274;2275;2276;3180;3310;3311;3312;3313;3314;3315;4328	418;960;1837;2274;3180;3311;3315;4328
sp|P0CX56|RS18B_YEAST;sp|P0CX55|RS18A_YEAST	sp|P0CX56|RS18B_YEAST;sp|P0CX55|RS18A_YEAST	14;14	14;14	14;14	sp|P0CX56|RS18B_YEAST 40S ribosomal protein S18-B OS=Saccharomyces cerevisiae (strain ATCC 204508 / S288c) GN=RPS18B PE=1 SV=1;sp|P0CX55|RS18A_YEAST 40S ribosomal protein S18-A OS=Saccharomyces cerevisiae (strain ATCC 204508 / S288c) GN=RPS18A PE=1 SV=1	2	14	14	14	75.3	75.3	75.3	17.037	146	146;146	0	225.34	0.583	0.91534	10.928	23	1	Leave out requantified	17900000000	11200000000	6610000000				114	59;369;975;1027;1032;1038;1276;1333;1715;1767;1801;1945;2598;2599	True;True;True;True;True;True;True;True;True;True;True;True;True;True	61;382;1003;1056;1057;1062;1068;1312;1371;1775;1827;1861;2011;2692;2693	73;489;490;1287;1354;1355;1356;1361;1362;1370;1678;1679;1753;2249;2250;2251;2252;2317;2365;2558;3432;3433;3434	122;123;763;764;765;766;1988;1989;2097;2098;2099;2100;2101;2102;2109;2110;2111;2119;2589;2590;2591;2592;2714;2715;3432;3433;3434;3435;3436;3437;3526;3602;3603;3894;3895;5207;5208;5209;5210	122;763;1988;2100;2111;2119;2592;2715;3436;3526;3602;3895;5207;5210		136			73
sp|P0CX83|RL19B_YEAST;sp|P0CX82|RL19A_YEAST	sp|P0CX83|RL19B_YEAST;sp|P0CX82|RL19A_YEAST	9;9	9;9	9;9	sp|P0CX83|RL19B_YEAST 60S ribosomal protein L19-B OS=Saccharomyces cerevisiae (strain ATCC 204508 / S288c) GN=RPL19B PE=1 SV=1;sp|P0CX82|RL19A_YEAST 60S ribosomal protein L19-A OS=Saccharomyces cerevisiae (strain ATCC 204508 / S288c) GN=RPL19A PE=1 SV=1	2	9	9	9	38.1	38.1	38.1	21.704	189	189;189	0	80.214	0.70069	1.1128	3.7723	9	1	Leave out requantified	2930000000	1700000000	1230000000				115	124;132;211;255;1132;1142;1316;1776;2485	True;True;True;True;True;True;True;True;True	131;139;219;263;1164;1174;1354;1836;2574	165;176;284;333;1492;1503;1733;2329;3280;3281	265;266;284;285;446;532;533;2303;2304;2319;2320;2672;2673;3549;4980;4981;4982	265;284;446;533;2303;2319;2672;3549;4981
sp|P0CX85|RL35B_YEAST;sp|P0CX84|RL35A_YEAST	sp|P0CX85|RL35B_YEAST;sp|P0CX84|RL35A_YEAST	7;7	7;7	7;7	sp|P0CX85|RL35B_YEAST 60S ribosomal protein L35-B OS=Saccharomyces cerevisiae (strain ATCC 204508 / S288c) GN=RPL35B PE=1 SV=1;sp|P0CX84|RL35A_YEAST 60S ribosomal protein L35-A OS=Saccharomyces cerevisiae (strain ATCC 204508 / S288c) GN=RPL35A PE=1 SV=1	2	7	7	7	43.3	43.3	43.3	13.909	120	120;120	0	71.212	0.67281	1.0622	5.9498	13	2	Leave out requantified	3830000000	2270000000	1560000000				116	520;596;1361;1688;1880;1905;1906	True;True;True;True;True;True;True	535;613;1399;1747;1945;1970;1971	694;695;792;793;1788;2216;2474;2475;2476;2505;2506;2507;2508	1098;1099;1240;1241;1242;1243;2763;2764;3386;3387;3765;3766;3767;3768;3812;3813;3814;3815;3816	1099;1243;2764;3387;3765;3813;3816
sp|P10080|SSBP1_YEAST	sp|P10080|SSBP1_YEAST	6	6	6	sp|P10080|SSBP1_YEAST Single-stranded nucleic acid-binding protein OS=Saccharomyces cerevisiae (strain ATCC 204508 / S288c) GN=SBP1 PE=1 SV=2	1	6	6	6	28.6	28.6	28.6	32.989	294	294	0	55.58	0.74964	1.1967	11.191	7	1	Leave out requantified	482000000	267000000	215000000				117	461;862;863;1805;1900;2251	True;True;True;True;True;True	476;883;884;1865;1965;2329	617;618;1130;1131;2369;2498;2964	988;989;990;1755;1756;3607;3799;4510;4511	989;1755;1756;3607;3799;4511		137			181
sp|P10363|PRI1_YEAST	sp|P10363|PRI1_YEAST	2	2	2	sp|P10363|PRI1_YEAST DNA primase small subunit OS=Saccharomyces cerevisiae (strain ATCC 204508 / S288c) GN=PRI1 PE=1 SV=2	1	2	2	2	3.9	3.9	3.9	47.69	409	409	0	10.929	0.68528	1.1059	NaN	1	0	Median	76314000	45192000	31122000				118	272;1670	True;True	281;1728	356;357;358;359;360;361;362;2193	571;572;573;574;575;576;577;3354	573;3354
sp|P10591|HSP71_YEAST;sp|P22202|HSP74_YEAST;sp|P09435|HSP73_YEAST	sp|P10591|HSP71_YEAST	31;10;9	4;0;0	4;0;0	sp|P10591|HSP71_YEAST Heat shock protein SSA1 OS=Saccharomyces cerevisiae (strain ATCC 204508 / S288c) GN=SSA1 PE=1 SV=4	3	31	4	4	50.3	9.2	9.2	69.656	642	642;642;649	0	46.45	0.56241	0.89512	8.9671	5	1	Leave out requantified	711000000	442000000	269000000				119	180;252;310;319;489;537;600;616;920;921;1011;1240;1352;1401;1408;1409;1438;1474;1519;1523;1586;1588;1599;1600;1608;1889;1986;2029;2148;2297;2399	False;False;False;False;True;False;False;False;False;False;False;False;False;False;False;False;False;False;True;False;True;False;False;False;True;False;False;False;False;False;False	188;260;320;329;504;552;617;633;943;944;1040;1275;1390;1443;1450;1451;1483;1527;1574;1578;1642;1644;1656;1657;1665;1954;2054;2100;2224;2376;2486	244;245;329;330;409;410;426;654;655;713;797;815;1207;1208;1209;1210;1335;1336;1628;1778;1837;1838;1846;1847;1848;1889;1890;1946;1999;2004;2082;2084;2100;2101;2102;2103;2115;2116;2485;2486;2614;2673;2674;2827;3020;3166;3167	387;388;389;525;526;527;646;647;648;671;1044;1045;1132;1133;1247;1248;1249;1269;1872;1873;1874;1875;1876;1877;1878;2070;2071;2072;2073;2510;2747;2748;2832;2833;2834;2844;2845;2846;2847;2848;2904;2905;2906;2987;2988;2989;2990;2991;3067;3068;3082;3083;3198;3199;3201;3221;3222;3223;3224;3225;3242;3243;3782;3783;3784;3985;4084;4085;4312;4595;4811;4812;4813	389;527;646;671;1045;1132;1247;1269;1872;1878;2070;2510;2748;2834;2845;2846;2904;2989;3068;3082;3199;3201;3221;3223;3242;3784;3985;4085;4312;4595;4811		138;139;140;141;142			59;85;125;515;602
sp|P10592|HSP72_YEAST	sp|P10592|HSP72_YEAST	33	33	6	sp|P10592|HSP72_YEAST Heat shock protein SSA2 OS=Saccharomyces cerevisiae (strain ATCC 204508 / S288c) GN=SSA2 PE=1 SV=3	1	33	33	6	53.4	53.4	12.1	69.469	639	639	0	323.31	0.58338	0.92747	9.1345	46	9	Leave out requantified	9300000000	5800000000	3500000000				120	180;252;310;319;411;490;537;600;616;920;921;1011;1042;1240;1352;1401;1408;1409;1438;1474;1520;1523;1585;1588;1599;1600;1889;1986;2029;2148;2237;2297;2399	True;True;True;True;True;True;True;True;True;True;True;True;True;True;True;True;True;True;True;True;True;True;True;True;True;True;True;True;True;True;True;True;True	188;260;320;329;425;505;552;617;633;943;944;1040;1072;1275;1390;1443;1450;1451;1483;1527;1575;1578;1641;1644;1656;1657;1954;2054;2100;2224;2315;2376;2486	244;245;329;330;409;410;426;553;656;713;797;815;1207;1208;1209;1210;1335;1336;1374;1628;1778;1837;1838;1846;1847;1848;1889;1890;1946;2000;2004;2081;2084;2100;2101;2102;2103;2485;2486;2614;2673;2674;2827;2944;3020;3166;3167	387;388;389;525;526;527;646;647;648;671;880;1046;1047;1132;1133;1247;1248;1249;1269;1872;1873;1874;1875;1876;1877;1878;2070;2071;2072;2073;2124;2510;2747;2748;2832;2833;2834;2844;2845;2846;2847;2848;2904;2905;2906;2987;2988;2989;2990;2991;3069;3070;3082;3083;3196;3197;3201;3221;3222;3223;3224;3225;3782;3783;3784;3985;4084;4085;4312;4477;4478;4595;4811;4812;4813	389;527;646;671;880;1046;1132;1247;1269;1872;1878;2070;2124;2510;2748;2834;2845;2846;2904;2989;3069;3082;3197;3201;3221;3223;3784;3985;4085;4312;4477;4595;4811		139;140;143;144;145			59;85;125;515;602
sp|P10622|RLA3_YEAST	sp|P10622|RLA3_YEAST	1	1	1	sp|P10622|RLA3_YEAST 60S acidic ribosomal protein P1-beta OS=Saccharomyces cerevisiae (strain ATCC 204508 / S288c) GN=RPP1B PE=1 SV=3	1	1	1	1	15.1	15.1	15.1	10.667	106	106	0	18.432	0.82592	1.2961	NaN	1	0	Median	623000000	341000000	282000000				121	9	TRUE	9	11	19;20	19
sp|P10659|METK1_YEAST	sp|P10659|METK1_YEAST	21	8	8	sp|P10659|METK1_YEAST S-adenosylmethionine synthase 1 OS=Saccharomyces cerevisiae (strain ATCC 204508 / S288c) GN=SAM1 PE=1 SV=2	1	21	8	8	59.7	30.9	30.9	41.818	382	382	0	172.01	0.52112	0.82648	15.248	16	4	Leave out requantified	5680000000	3730000000	1950000000				122	75;284;313;666;667;857;869;908;930;1077;1078;1306;1512;1804;1838;1941;2090;2125;2209;2210;2531	True;True;False;False;False;True;True;False;False;False;False;False;False;False;True;False;True;False;True;True;False	79;80;293;323;684;685;878;890;930;954;1107;1108;1342;1343;1566;1864;1900;2007;2162;2199;2286;2287;2621	98;99;100;377;378;413;414;415;416;417;878;879;1123;1124;1139;1140;1189;1190;1222;1421;1422;1423;1713;1714;1715;1716;1717;1990;1991;2368;2418;2419;2552;2553;2750;2751;2794;2909;2910;2911;3344;3345	160;161;162;597;598;599;652;653;654;655;656;657;658;659;1369;1370;1371;1746;1747;1748;1766;1767;1768;1843;1844;1845;1897;2193;2194;2195;2196;2637;2638;2639;2640;2641;2642;2643;2644;2645;3051;3052;3053;3054;3606;3687;3688;3689;3690;3886;3887;3888;4195;4196;4197;4198;4259;4424;4425;4426;4427;5071;5072;5073	162;599;657;1369;1371;1747;1768;1843;1897;2193;2196;2637;3053;3606;3689;3888;4196;4259;4424;4427;5073		146;147;148;149;150			51;53;149;151;222
sp|P10664|RL4A_YEAST	sp|P10664|RL4A_YEAST	16	16	2	sp|P10664|RL4A_YEAST 60S ribosomal protein L4-A OS=Saccharomyces cerevisiae (strain ATCC 204508 / S288c) GN=RPL4A PE=1 SV=4	1	16	16	2	51.7	51.7	4.4	39.092	362	362	0	234.32	0.70196	1.1283	5.2104	26	7	Leave out requantified	11100000000	6170000000	4950000000				123	63;393;745;923;924;976;1188;1617;1663;1773;1874;2130;2131;2315;2344;2516	True;True;True;True;True;True;True;True;True;True;True;True;True;True;True;True	65;407;766;946;947;1004;1221;1674;1720;1833;1938;1939;2204;2205;2395;2427;2605	78;79;524;975;976;1213;1214;1215;1288;1289;1559;2127;2182;2183;2323;2324;2325;2465;2466;2800;2801;2802;3044;3088;3089;3090;3322;3323	129;130;131;132;821;822;1517;1518;1883;1884;1885;1886;1887;1888;1990;1991;1992;1993;1994;1995;1996;1997;1998;2401;2402;2403;3257;3258;3337;3338;3339;3538;3539;3540;3753;3754;3755;4269;4270;4271;4272;4630;4703;4704;4705;4706;5040;5041;5042;5043;5044;5045	131;821;1517;1883;1888;1993;2401;3258;3338;3539;3755;4269;4272;4630;4705;5044		151			93
sp|P10964|RPA1_YEAST	sp|P10964|RPA1_YEAST	4	4	4	sp|P10964|RPA1_YEAST DNA-directed RNA polymerase I subunit RPA190 OS=Saccharomyces cerevisiae (strain ATCC 204508 / S288c) GN=RPA190 PE=1 SV=2	1	4	4	4	3.3	3.3	3.3	186.43	1664	1664	0	30.662	0.57039	0.9182	65.764	4	2	Median	94304000	48630000	45674000				124	1329;1897;2048;2265	True;True;True;True	1367;1962;2120;2343	1747;1748;2494;2698;2980	2707;2708;3795;4123;4533	2708;3795;4123;4533		152			1439
sp|P11076|ARF1_YEAST;sp|P19146|ARF2_YEAST	sp|P11076|ARF1_YEAST;sp|P19146|ARF2_YEAST	5;3	5;3	5;3	sp|P11076|ARF1_YEAST ADP-ribosylation factor 1 OS=Saccharomyces cerevisiae (strain ATCC 204508 / S288c) GN=ARF1 PE=1 SV=3;sp|P19146|ARF2_YEAST ADP-ribosylation factor 2 OS=Saccharomyces cerevisiae (strain ATCC 204508 / S288c) GN=ARF2 PE=1 SV=3	2	5	5	5	32.6	32.6	32.6	20.529	181	181;181	0	45.431	0.54318	0.86734	9.1771	8	4	Leave out requantified	1570000000	860000000	708000000				125	950;1215;1479;1607;1667	True;True;True;True;True	974;975;1249;1532;1664;1724;1725	1244;1245;1246;1595;1952;2114;2188;2189	1923;1924;1925;2465;3000;3001;3241;3346;3347;3348;3349	1923;2465;3000;3241;3349		153;154			22;134
sp|P11746|MCM1_YEAST	sp|P11746|MCM1_YEAST	2	2	2	sp|P11746|MCM1_YEAST Pheromone receptor transcription factor OS=Saccharomyces cerevisiae (strain ATCC 204508 / S288c) GN=MCM1 PE=1 SV=2	1	2	2	2	17.8	17.8	17.8	32.801	286	286	0	32.324	0.50919	0.81469	NaN	1	0	Median	199000000	117000000	81682000				126	1730;1841	True;True	1790;1903	2272;2423	3464;3465;3694	3465;3694			3			2
sp|P12612|TCPA_YEAST	sp|P12612|TCPA_YEAST	9	9	9	sp|P12612|TCPA_YEAST T-complex protein 1 subunit alpha OS=Saccharomyces cerevisiae (strain ATCC 204508 / S288c) GN=TCP1 PE=1 SV=2	1	9	9	9	20.6	20.6	20.6	60.48	559	559	0	70.007	0.54035	0.86571	9.8359	9	3	Leave out requantified	537000000	202000000	335000000				127	446;613;650;685;837;962;1629;1818;2156	True;True;True;True;True;True;True;True;True	461;630;668;703;858;987;1686;1879;2232	600;811;860;900;1098;1262;2141;2390;2839	953;954;1265;1345;1406;1716;1950;3281;3641;4329	954;1265;1345;1406;1716;1950;3281;3641;4329		155;156			233;398
sp|P12686|RT13_YEAST	sp|P12686|RT13_YEAST	1	1	1	sp|P12686|RT13_YEAST 37S ribosomal protein MRP13, mitochondrial OS=Saccharomyces cerevisiae (strain ATCC 204508 / S288c) GN=MRP13 PE=1 SV=2	1	1	1	1	4.4	4.4	4.4	38.988	339	339	0	6.0958	0.34922	0.57771	NaN	1	1	Median	2751800	1992600	759270				128	1574	TRUE	1630	2066	3177	3177
sp|P12695|ODP2_YEAST	sp|P12695|ODP2_YEAST	2	2	2	sp|P12695|ODP2_YEAST Dihydrolipoyllysine-residue acetyltransferase component of pyruvate dehydrogenase complex, mitochondrial OS=Saccharomyces cerevisiae (strain ATCC 204508 / S288c) GN=LAT1 PE=1 SV=1	1	2	2	2	4.4	4.4	4.4	51.817	482	482	0	13.071	0.33066	0.53333	NaN	1	0	Median	1107400	766190	341160				129	1104;2252	True;True	1135;2330	1455;2965	2249;2250;4512;4513	2250;4513		157			480
sp|P14020|DPM1_YEAST	sp|P14020|DPM1_YEAST	6	6	6	sp|P14020|DPM1_YEAST Dolichol-phosphate mannosyltransferase OS=Saccharomyces cerevisiae (strain ATCC 204508 / S288c) GN=DPM1 PE=1 SV=3	1	6	6	6	26.2	26.2	26.2	30.362	267	267	0	53.504	0.50455	0.83323	16.676	7	3	Leave out requantified	276000000	174000000	102000000				130	851;1640;1885;2272;2351;2557	True;True;True;True;True;True	872;1697;1950;2351;2435;2647	1117;2153;2481;2990;2991;3101;3376	1739;3296;3774;4546;4547;4722;5119	1739;3296;3774;4547;4722;5119		158			158
sp|P14120|RL30_YEAST	sp|P14120|RL30_YEAST	6	6	6	sp|P14120|RL30_YEAST 60S ribosomal protein L30 OS=Saccharomyces cerevisiae (strain ATCC 204508 / S288c) GN=RPL30 PE=1 SV=3	1	6	6	6	64.8	64.8	64.8	11.415	105	105	0	62.529	0.41	0.65088	19.872	9	2	Leave out requantified	3130000000	2180000000	944000000				131	1111;1245;1859;1977;2343;2490	True;True;True;True;True;True	1143;1280;1923;2045;2426;2579	1464;1465;1466;1636;2446;2601;2602;3086;3087;3286;3287	2261;2262;2263;2522;2523;3722;3964;3965;3966;3967;3968;3969;3970;4699;4700;4701;4702;4989;4990;4991	2263;2522;3722;3967;4702;4989		159			61
sp|P14126|RL3_YEAST	sp|P14126|RL3_YEAST	20	20	20	sp|P14126|RL3_YEAST 60S ribosomal protein L3 OS=Saccharomyces cerevisiae (strain ATCC 204508 / S288c) GN=RPL3 PE=1 SV=4	1	20	20	20	47.5	47.5	47.5	43.757	387	387	0	198.22	0.71111	1.1309	14.958	32	3	Leave out requantified	7450000000	4310000000	3140000000				132	70;78;115;302;647;693;800;1045;1112;1114;1496;1907;1940;1948;2147;2244;2335;2392;2501;2515	True;True;True;True;True;True;True;True;True;True;True;True;True;True;True;True;True;True;True;True	73;74;83;122;311;664;711;821;1075;1144;1146;1549;1550;1972;2006;2014;2223;2322;2418;2478;2590;2604	91;92;103;104;153;154;398;855;856;910;1048;1377;1467;1469;1970;1971;1972;2509;2510;2511;2551;2562;2563;2564;2825;2826;2952;2953;3075;3076;3154;3301;3302;3320;3321	149;150;151;167;168;169;170;247;248;249;250;628;629;1336;1337;1338;1339;1422;1423;1626;2128;2129;2264;2265;2267;2268;3023;3024;3025;3026;3817;3818;3819;3820;3884;3885;3900;3901;3902;4309;4310;4311;4490;4491;4492;4680;4681;4682;4683;4795;4796;5010;5011;5012;5036;5037;5038;5039	149;169;250;629;1337;1423;1626;2128;2264;2267;3023;3820;3884;3900;4311;4490;4682;4795;5012;5038		160;161;162;163;164			53;214;308;323;380
sp|P14540|ALF_YEAST	sp|P14540|ALF_YEAST	7	7	7	sp|P14540|ALF_YEAST Fructose-bisphosphate aldolase OS=Saccharomyces cerevisiae (strain ATCC 204508 / S288c) GN=FBA1 PE=1 SV=3	1	7	7	7	28.1	28.1	28.1	39.62	359	359	0	96.298	0.37048	0.59291	9.6486	8	2	Leave out requantified	1150000000	678000000	476000000				133	370;682;718;780;1883;1972;2404	True;True;True;True;True;True;True	383;700;736;801;1948;2039;2491	491;492;897;940;1020;1021;2479;2594;3176	767;768;1402;1466;1467;1584;1585;3772;3954;3955;4828	767;1402;1466;1585;3772;3954;4828		165			312
sp|P14742|GFA1_YEAST	sp|P14742|GFA1_YEAST	3	3	3	sp|P14742|GFA1_YEAST Glutamine--fructose-6-phosphate aminotransferase [isomerizing] OS=Saccharomyces cerevisiae (strain ATCC 204508 / S288c) GN=GFA1 PE=1 SV=4	1	3	3	3	4.3	4.3	4.3	80.046	717	717	0	18.567	0.53187	0.87632	6.6806	3	0	Leave out requantified	96258000	60372000	35886000				134	881;1830;2482	True;True;True	903;1891;2571	1154;2405;3277	1789;3666;4976	1789;3666;4976
sp|P15180|SYKC_YEAST	sp|P15180|SYKC_YEAST	1	1	1	sp|P15180|SYKC_YEAST Lysine--tRNA ligase, cytoplasmic OS=Saccharomyces cerevisiae (strain ATCC 204508 / S288c) GN=KRS1 PE=1 SV=2	1	1	1	1	1.4	1.4	1.4	67.958	591	591	0	5.904	0.34977	0.57216	NaN	1	0	Median	14485000	10666000	3819300				135	852	TRUE	873	1118	1740	1740
sp|P15646|FBRL_YEAST	sp|P15646|FBRL_YEAST	4	4	4	sp|P15646|FBRL_YEAST rRNA 2-O-methyltransferase fibrillarin OS=Saccharomyces cerevisiae (strain ATCC 204508 / S288c) GN=NOP1 PE=1 SV=1	1	4	4	4	15.9	15.9	15.9	34.465	327	327	0	25.816	0.58431	0.94219	7.9267	4	0	Leave out requantified	147000000	86036000	60766000				136	323;934;1006;1564	True;True;True;True	334;958;1035;1619	432;1226;1328;2051	678;1901;2060;3147;3148	678;1901;2060;3148		166			111
sp|P16140|VATB_YEAST	sp|P16140|VATB_YEAST	9	9	9	sp|P16140|VATB_YEAST V-type proton ATPase subunit B OS=Saccharomyces cerevisiae (strain ATCC 204508 / S288c) GN=VMA2 PE=1 SV=2	1	9	9	9	19.7	19.7	19.7	57.749	517	517	0	99.063	0.51715	0.82693	8.7412	9	2	Leave out requantified	661000000	427000000	234000000				137	97;197;938;1353;1666;1684;2111;2221;2573	True;True;True;True;True;True;True;True;True	102;205;962;1391;1723;1743;2184;2298;2665	125;265;1230;1779;2187;2212;2776;2924;3396	204;205;413;1906;2749;3344;3345;3381;4233;4234;4446;4447;5149;5150	204;413;1906;2749;3344;3381;4233;4446;5149
sp|P16387|ODPA_YEAST	sp|P16387|ODPA_YEAST	1	1	1	sp|P16387|ODPA_YEAST Pyruvate dehydrogenase E1 component subunit alpha, mitochondrial OS=Saccharomyces cerevisiae (strain ATCC 204508 / S288c) GN=PDA1 PE=1 SV=2	1	1	1	1	2.1	2.1	2.1	46.343	420	420	0	6.2679	0.52416	0.84905	NaN	1	0	Median	39428000	27371000	12057000				138	1189	TRUE	1222	1560	2404;2405	2404
sp|P16474|GRP78_YEAST	sp|P16474|GRP78_YEAST	10	8	8	sp|P16474|GRP78_YEAST 78 kDa glucose-regulated protein homolog OS=Saccharomyces cerevisiae (strain ATCC 204508 / S288c) GN=KAR2 PE=1 SV=1	1	10	8	8	16.4	13.6	13.6	74.467	682	682	0	63.124	0.58456	0.93387	6.5666	7	3	Leave out requantified	423000000	277000000	146000000				139	252;319;601;1014;1023;1591;1604;1687;2100;2389	False;False;True;True;True;True;True;True;True;True	260;329;618;1043;1052;1647;1661;1746;2173;2475	329;330;426;798;1340;1350;2088;2089;2110;2215;2765;3151	525;526;527;671;1250;2077;2089;2090;3206;3207;3236;3237;3385;4218;4792	527;671;1250;2077;2090;3207;3236;3385;4218;4792
sp|P16521|EF3A_YEAST;sp|P53978|EF3B_YEAST	sp|P16521|EF3A_YEAST	24;5	24;5	24;5	sp|P16521|EF3A_YEAST Elongation factor 3A OS=Saccharomyces cerevisiae (strain ATCC 204508 / S288c) GN=YEF3 PE=1 SV=4	2	24	24	24	24.6	24.6	24.6	115.94	1044	1044;1044	0	204.99	0.51661	0.83477	13.939	26	2	Leave out requantified	2170000000	1320000000	848000000				140	5;80;121;182;289;382;638;646;736;846;855;1060;1097;1390;1459;1460;1470;1475;1561;1691;1823;1849;2200;2370	True;True;True;True;True;True;True;True;True;True;True;True;True;True;True;True;True;True;True;True;True;True;True;True	5;85;128;190;298;396;655;663;757;867;876;1090;1128;1431;1510;1511;1523;1528;1616;1750;1884;1913;2277;2456	6;106;162;248;384;513;843;853;854;965;1110;1121;1397;1447;1823;1926;1927;1942;1947;2047;2220;2397;2435;2436;2900;3127	8;9;10;11;172;261;392;607;608;805;1308;1309;1332;1333;1334;1335;1502;1503;1729;1743;1744;2158;2239;2810;2960;2961;2981;2982;2992;2993;3141;3142;3392;3393;3651;3652;3708;3709;3710;3711;4414;4758;4759	8;172;261;392;607;805;1309;1334;1502;1729;1743;2158;2239;2810;2960;2961;2981;2992;3142;3392;3651;3708;4414;4759		167;168;169;170;171;172;173;174;175;176			168;179;194;273;769;784;852;858;971;1001
sp|P16622|HEMH_YEAST	sp|P16622|HEMH_YEAST	3	3	3	sp|P16622|HEMH_YEAST Ferrochelatase, mitochondrial OS=Saccharomyces cerevisiae (strain ATCC 204508 / S288c) GN=HEM15 PE=1 SV=1	1	3	3	3	12	12	12	44.596	393	393	0	25.272	0.66293	1.0683	25.659	3	1	Plateau	106000000	60880000	44731000				141	1876;1974;2512	True;True;True	1941;2042;2601	2468;2597;3316	3757;3959;5031	3757;3959;5031		177;178			44;46
sp|P16861|PFKA1_YEAST	sp|P16861|PFKA1_YEAST	4	4	4	sp|P16861|PFKA1_YEAST ATP-dependent 6-phosphofructokinase subunit alpha OS=Saccharomyces cerevisiae (strain ATCC 204508 / S288c) GN=PFK1 PE=1 SV=1	1	4	4	4	6.3	6.3	6.3	107.97	987	987	0	36.957	0.53549	0.88355	7.215	5	1	Leave out requantified	78023000	53691000	24333000				142	856;1505;1511;2502	True;True;True;True	877;1559;1565;2591	1122;1982;1988;1989;3303	1745;3040;3049;3050;5013	1745;3040;3050;5013		179;180			211;220
sp|P16862|PFKA2_YEAST	sp|P16862|PFKA2_YEAST	1	1	1	sp|P16862|PFKA2_YEAST ATP-dependent 6-phosphofructokinase subunit beta OS=Saccharomyces cerevisiae (strain ATCC 204508 / S288c) GN=PFK2 PE=1 SV=4	1	1	1	1	0.9	0.9	0.9	104.62	959	959	0.002591	5.8222	0.59702	0.94229	NaN	1	1	Median	30192000	15083000	15109000				143	189	TRUE	197	256	401	401
sp|P17076|RL8A_YEAST	sp|P17076|RL8A_YEAST	17	3	3	sp|P17076|RL8A_YEAST 60S ribosomal protein L8-A OS=Saccharomyces cerevisiae (strain ATCC 204508 / S288c) GN=RPL8A PE=1 SV=4	1	17	3	3	51.2	11.3	11.3	28.124	256	256	0	18.971	0.6498	1.0548	59.698	4	1	Median	527000000	134000000	393000000				144	37;376;1228;1261;1406;1407;1432;1579;1603;1664;1908;2212;2213;2275;2422;2590;2591	False;True;False;False;False;False;True;False;False;False;False;True;False;False;False;False;False	38;389;1262;1296;1448;1449;1477;1635;1660;1721;1973;2289;2290;2354;2509;2684;2685	45;500;501;1611;1612;1657;1843;1844;1845;1882;2072;2073;2108;2109;2184;2185;2512;2513;2913;2914;2915;2995;3202;3203;3419;3420	70;71;784;785;786;2486;2487;2488;2489;2556;2840;2841;2842;2843;2896;3185;3186;3232;3233;3234;3235;3340;3341;3342;3821;3822;3823;4429;4430;4431;4432;4552;4553;4865;4866;4867;4868;5185;5186;5187	70;785;2488;2556;2840;2843;2896;3186;3234;3340;3823;4429;4432;4552;4865;5186;5187		181			173
sp|P17255|VATA_YEAST	sp|P17255|VATA_YEAST	4	4	4	sp|P17255|VATA_YEAST V-type proton ATPase catalytic subunit A OS=Saccharomyces cerevisiae (strain ATCC 204508 / S288c) GN=VMA1 PE=1 SV=3	1	4	4	4	5.3	5.3	5.3	118.64	1071	1071	0	33.7	0.48743	0.7879	15.387	4	1	Leave out requantified	186000000	72701000	113000000				145	56;1222;1284;2363	True;True;True;True	58;1256;1320;2448	69;1604;1688;3118	114;115;2476;2605;4747	114;2476;2605;4747		182;183			829;1062
sp|P18239|ADT2_YEAST;sp|P18238|ADT3_YEAST;sp|P04710|ADT1_YEAST	sp|P18239|ADT2_YEAST	8;3;1	8;3;1	8;3;1	sp|P18239|ADT2_YEAST ADP,ATP carrier protein 2 OS=Saccharomyces cerevisiae (strain ATCC 204508 / S288c) GN=PET9 PE=1 SV=2	3	8	8	8	23.9	23.9	23.9	34.426	318	318;307;309	0	57.754	0.59881	0.97803	2.4623	9	2	Leave out requantified	587000000	355000000	233000000				146	1017;1451;1840;2009;2062;2511;2520;2532	True;True;True;True;True;True;True;True	1046;1501;1902;2080;2134;2600;2609;2622	1344;1915;2421;2422;2647;2648;2714;2715;3315;3329;3346	2082;2945;2946;3692;3693;4036;4037;4038;4144;4145;5029;5030;5054;5074;5075	2082;2945;3693;4036;4145;5030;5054;5074		184;185;186			255;256;257
sp|P18759|SEC18_YEAST	sp|P18759|SEC18_YEAST	1	1	1	sp|P18759|SEC18_YEAST Vesicular-fusion protein SEC18 OS=Saccharomyces cerevisiae (strain ATCC 204508 / S288c) GN=SEC18 PE=1 SV=2	1	1	1	1	1.6	1.6	1.6	84.055	758	758	0	5.9265	0.47514	0.76971	NaN	1	1	Median	40042000	26081000	13961000				147	727	TRUE	745	950	1481	1481
sp|P18962|DAP2_YEAST	sp|P18962|DAP2_YEAST	1	1	1	sp|P18962|DAP2_YEAST Dipeptidyl aminopeptidase B OS=Saccharomyces cerevisiae (strain ATCC 204508 / S288c) GN=DAP2 PE=1 SV=2	1	1	1	1	1	1	1	93.403	818	818	1	-2	NaN	NaN	NaN	0	0	Median	0	0	0	#ERROR!			148	1417	TRUE	1459	1859	2864	2864			4;36			453;454
sp|P19097|FAS2_YEAST	sp|P19097|FAS2_YEAST	4	4	4	sp|P19097|FAS2_YEAST Fatty acid synthase subunit alpha OS=Saccharomyces cerevisiae (strain ATCC 204508 / S288c) GN=FAS2 PE=1 SV=2	1	4	4	4	2.7	2.7	2.7	206.94	1887	1887	0	31.202	0.60552	0.9581	4.5298	4	1	Leave out requantified	110000000	65913000	43950000				149	207;208;448;760	True;True;True;True	215;216;463;781	278;279;602;993	435;436;437;957;958;1542;1543	435;437;957;1542
sp|P19358|METK2_YEAST	sp|P19358|METK2_YEAST	22	22	9	sp|P19358|METK2_YEAST S-adenosylmethionine synthase 2 OS=Saccharomyces cerevisiae (strain ATCC 204508 / S288c) GN=SAM2 PE=1 SV=3	1	22	22	9	56.2	56.2	27.6	42.255	384	384	0	216.88	0.52233	0.83532	10.379	36	3	Leave out requantified	9800000000	6370000000	3430000000				150	167;285;313;666;667;858;908;930;1077;1078;1190;1306;1512;1804;1833;1834;1941;2089;2113;2125;2208;2531	True;True;True;True;True;True;True;True;True;True;True;True;True;True;True;True;True;True;True;True;True;True	175;294;323;684;685;879;930;954;1107;1108;1223;1342;1343;1566;1864;1894;1895;2007;2161;2186;2199;2285;2621	225;379;380;413;414;415;416;417;878;879;1125;1126;1189;1190;1222;1421;1422;1423;1561;1713;1714;1715;1716;1717;1990;1991;2368;2409;2410;2411;2552;2553;2749;2778;2794;2908;3344;3345	360;600;601;602;603;652;653;654;655;656;657;658;659;1369;1370;1371;1749;1750;1751;1843;1844;1845;1897;2193;2194;2195;2196;2406;2637;2638;2639;2640;2641;2642;2643;2644;2645;3051;3052;3053;3054;3606;3674;3675;3676;3677;3678;3886;3887;3888;4193;4194;4236;4237;4259;4422;4423;5071;5072;5073	360;603;657;1369;1371;1750;1843;1897;2193;2196;2406;2637;3053;3606;3674;3677;3888;4194;4236;4259;4423;5073		146;147;148;149;150			53;55;151;153;224
sp|P19659|MED15_YEAST	sp|P19659|MED15_YEAST	1	1	1	sp|P19659|MED15_YEAST Mediator of RNA polymerase II transcription subunit 15 OS=Saccharomyces cerevisiae (strain ATCC 204508 / S288c) GN=GAL11 PE=1 SV=3	1	1	1	1	0.6	0.6	0.6	120.31	1081	1081	0.007634	5.7454	NaN	NaN	NaN	0	0	Median	0	0	0				151	1246	TRUE	1281	1637	2524	2524	0;1			609;612
sp|P19882|HSP60_YEAST	sp|P19882|HSP60_YEAST	6	6	6	sp|P19882|HSP60_YEAST Heat shock protein 60, mitochondrial OS=Saccharomyces cerevisiae (strain ATCC 204508 / S288c) GN=HSP60 PE=1 SV=1	1	6	6	6	15.2	15.2	15.2	60.751	572	572	0	56.12	0.35653	0.57749	11.876	7	1	Leave out requantified	182000000	121000000	61731000				152	22;781;1612;1616;2188;2366	True;True;True;True;True;True	22;802;1669;1673;2264;2451	27;1022;1023;2120;2126;2880;3122	46;1586;1587;1588;1589;3248;3256;4387;4751	46;1586;3248;3256;4387;4751		187			135
sp|P20436|RPAB3_YEAST	sp|P20436|RPAB3_YEAST	2	2	2	sp|P20436|RPAB3_YEAST DNA-directed RNA polymerases I, II, and III subunit RPABC3 OS=Saccharomyces cerevisiae (strain ATCC 204508 / S288c) GN=RPB8 PE=1 SV=1	1	2	2	2	20.5	20.5	20.5	16.511	146	146	0	21.05	1.114	1.8212	40.116	2	1	Median	13534000	6138000	7396200				153	872;1966	True;True	893;2033	1143;2587	1772;3943;3944	1772;3944
sp|P20606|SAR1_YEAST	sp|P20606|SAR1_YEAST	2	2	2	sp|P20606|SAR1_YEAST Small COPII coat GTPase SAR1 OS=Saccharomyces cerevisiae (strain ATCC 204508 / S288c) GN=SAR1 PE=1 SV=1	1	2	2	2	17.9	17.9	17.9	21.45	190	190	0	21.331	0.48477	0.78033	27.749	2	0	Median	124000000	83522000	40085000				154	1173;1809	True;True	1206;1869	1539;2374	2374;3614;3615	2374;3614
sp|P21524|RIR1_YEAST;sp|P21672|RIR3_YEAST	sp|P21524|RIR1_YEAST	3;1	3;1	3;1	sp|P21524|RIR1_YEAST Ribonucleoside-diphosphate reductase large chain 1 OS=Saccharomyces cerevisiae (strain ATCC 204508 / S288c) GN=RNR1 PE=1 SV=2	2	3	3	3	4.1	4.1	4.1	99.56	888	888;869	0	34.547	1.0022	1.6239	205.46	2	1	Median	81337000	29889000	51447000				155	732;845;2143	True;True;True	751;866;2218	956;1109;2819	1490;1728;4300	1490;1728;4300		188;189			698;829
sp|P21560|CBP3_YEAST	sp|P21560|CBP3_YEAST	3	3	3	sp|P21560|CBP3_YEAST Protein CBP3, mitochondrial OS=Saccharomyces cerevisiae (strain ATCC 204508 / S288c) GN=CBP3 PE=1 SV=1	1	3	3	3	8.7	8.7	8.7	39.083	335	335	0	18.956	0.60168	0.95767	32.813	2	0	Median	222000000	139000000	83461000				156	541;2116;2524	True;True;True	556;2189;2614	719;2782;3335	1145;4242;4243;5062	1145;4243;5062
sp|P22137|CLH_YEAST	sp|P22137|CLH_YEAST	5	5	5	sp|P22137|CLH_YEAST Clathrin heavy chain OS=Saccharomyces cerevisiae (strain ATCC 204508 / S288c) GN=CHC1 PE=1 SV=1	1	5	5	5	3.1	3.1	3.1	187.23	1653	1653	0	35.247	0.68861	1.1126	24.796	4	1	Leave out requantified	96857000	55814000	41043000				157	254;651;1036;1198;1589	True;True;True;True;True	262;669;1066;1231;1645	332;861;862;1367;1571;2085	531;1346;1347;2116;2422;3202	531;1346;2116;2422;3202
sp|P22213|SLY1_YEAST	sp|P22213|SLY1_YEAST	16	16	16	sp|P22213|SLY1_YEAST Protein SLY1 OS=Saccharomyces cerevisiae (strain ATCC 204508 / S288c) GN=SLY1 PE=1 SV=1	1	16	16	16	31.5	31.5	31.5	74.678	666	666	0	183.73	0.093907	0.15267	132.01	12	12	Median	1040000000	959000000	85028000				158	195;500;504;505;1094;1219;1326;1552;1554;1917;2022;2135;2145;2189;2381;2398	True;True;True;True;True;True;True;True;True;True;True;True;True;True;True;True	203;515;519;520;1125;1253;1364;1607;1609;1982;2093;2210;2220;2221;2265;2467;2485	262;263;669;674;675;676;1443;1599;1600;1743;2037;2039;2524;2664;2808;2821;2822;2881;2882;3141;3165	409;410;1064;1071;1072;1073;2232;2471;2472;2703;3125;3127;3838;4062;4281;4302;4303;4304;4388;4389;4777;4810	410;1064;1072;1073;2232;2472;2703;3125;3127;3838;4062;4281;4302;4388;4777;4810		190;191			566;637
sp|P22336|RFA1_YEAST	sp|P22336|RFA1_YEAST	8	8	8	sp|P22336|RFA1_YEAST Replication factor A protein 1 OS=Saccharomyces cerevisiae (strain ATCC 204508 / S288c) GN=RFA1 PE=1 SV=1	1	8	8	8	14.3	14.3	14.3	70.347	621	621	0	54.434	0.56564	0.91406	29.389	6	3	Leave out requantified	304000000	186000000	118000000				159	13;630;644;1486;1707;2021;2301;2374	True;True;True;True;True;True;True;True	13;647;661;1539;1767;2092;2380;2460	17;832;851;1959;2241;2663;3024;3132	30;1291;1328;1329;3010;3422;4061;4600;4765	30;1291;1328;3010;3422;4061;4600;4765		192;193			72;553
sp|P22353|RM08_YEAST	sp|P22353|RM08_YEAST	1	1	1	sp|P22353|RM08_YEAST 54S ribosomal protein L8, mitochondrial OS=Saccharomyces cerevisiae (strain ATCC 204508 / S288c) GN=MRPL8 PE=1 SV=4	1	1	1	1	5.9	5.9	5.9	26.945	238	238	0	8.5864	0.21649	0.34115	NaN	1	0	Median	27310000	21194000	6116300				160	96	TRUE	101	124	203	203
sp|P22354|RM20_YEAST	sp|P22354|RM20_YEAST	2	2	2	sp|P22354|RM20_YEAST 54S ribosomal protein L20, mitochondrial OS=Saccharomyces cerevisiae (strain ATCC 204508 / S288c) GN=MRPL20 PE=1 SV=2	1	2	2	2	8.2	8.2	8.2	22.392	195	195	0	11	0.20925	0.33485	NaN	1	1	Median	141000000	122000000	18654000				161	1323;2207	True;True	1361;2284	1740;2907	2699;4421	2699;4421
sp|P23248|RS3A2_YEAST	sp|P23248|RS3A2_YEAST	15	15	4	sp|P23248|RS3A2_YEAST 40S ribosomal protein S1-B OS=Saccharomyces cerevisiae (strain ATCC 204508 / S288c) GN=RPS1B PE=1 SV=3	1	15	15	4	58.4	58.4	15.7	28.812	255	255	0	132.92	0.6754	1.0647	7.7381	19	3	Leave out requantified	5180000000	3100000000	2090000000				162	153;287;441;571;594;1252;1338;1489;1555;2214;2294;2357;2439;2468;2469	True;True;True;True;True;True;True;True;True;True;True;True;True;True;True	161;296;456;588;611;1287;1376;1542;1610;2291;2373;2442;2526;2557;2558	203;204;382;592;593;759;789;790;1644;1645;1761;1962;2040;2916;3017;3109;3223;3261;3262	331;332;605;937;938;939;940;941;942;943;1198;1235;1236;1237;2535;2536;2537;2538;2723;3013;3128;3129;4433;4434;4586;4587;4588;4589;4590;4591;4731;4732;4893;4894;4946;4947;4948;4949	332;605;942;1198;1237;2537;2723;3013;3128;4434;4589;4731;4893;4946;4948		194;195			103;229
sp|P23615|SPT6_YEAST	sp|P23615|SPT6_YEAST	2	2	2	sp|P23615|SPT6_YEAST Transcription elongation factor SPT6 OS=Saccharomyces cerevisiae (strain ATCC 204508 / S288c) GN=SPT6 PE=1 SV=1	1	2	2	2	1.9	1.9	1.9	168.29	1451	1451	0	18.032	0.86611	1.4023	32.004	2	1	Median	41051000	22388000	18663000				163	1152;2331	True;True	1184;2414	1513;3070	2332;4673	2332;4673
sp|P23641|MPCP_YEAST	sp|P23641|MPCP_YEAST	5	5	5	sp|P23641|MPCP_YEAST Mitochondrial phosphate carrier protein OS=Saccharomyces cerevisiae (strain ATCC 204508 / S288c) GN=MIR1 PE=1 SV=1	1	5	5	5	22.8	22.8	22.8	32.812	311	311	0	40.614	0.61522	1.0027	1.39	5	2	Leave out requantified	385000000	173000000	212000000				164	582;603;605;989;1405	True;True;True;True;True	599;620;622;1017;1447	774;800;802;1306;1842	1217;1252;1255;2024;2838;2839	1217;1252;1255;2024;2838		196			35
sp|P23900|FPS1_YEAST	sp|P23900|FPS1_YEAST	4	4	4	sp|P23900|FPS1_YEAST Glycerol uptake/efflux facilitator protein OS=Saccharomyces cerevisiae (strain ATCC 204508 / S288c) GN=FPS1 PE=1 SV=2	1	4	4	4	9.9	9.9	9.9	73.877	669	669	0	49.687	0.66653	1.0626	4.4265	6	2	Leave out requantified	205000000	120000000	84902000				165	186;2006;2183;2230	True;True;True;True	194;2076;2259;2308	252;253;2641;2642;2875;2937	397;398;4028;4029;4382;4466;4467	398;4028;4382;4466		197			207
sp|P24000|RL24B_YEAST	sp|P24000|RL24B_YEAST	7	7	2	sp|P24000|RL24B_YEAST 60S ribosomal protein L24-B OS=Saccharomyces cerevisiae (strain ATCC 204508 / S288c) GN=RPL24B PE=1 SV=1	1	7	7	2	27.1	27.1	7.7	17.547	155	155	0	53.761	0.75653	1.1981	5.2517	9	0	Leave out requantified	2510000000	1430000000	1070000000				166	164;720;1070;1443;1636;1924;2319	True;True;True;True;True;True;True	172;738;1100;1488;1693;1989;2400	221;222;943;1411;1898;1899;2149;2532;3049	355;356;357;1471;1472;2177;2178;2919;2920;2921;2922;3290;3291;3850;3851;4638;4639	356;1471;2177;2919;3291;3850;4639		198			1
sp|P24783|DBP2_YEAST	sp|P24783|DBP2_YEAST	23	22	22	sp|P24783|DBP2_YEAST ATP-dependent RNA helicase DBP2 OS=Saccharomyces cerevisiae (strain ATCC 204508 / S288c) GN=DBP2 PE=1 SV=1	1	23	22	22	46.9	44.9	44.9	60.999	546	546	0	196.73	0.58414	0.93189	17.805	26	6	Leave out requantified	3120000000	1940000000	1190000000				167	41;57;281;314;326;368;390;470;755;1081;1238;1445;1524;1602;1606;1750;1848;1968;1973;2058;2163;2462;2559	True;True;True;True;True;True;True;True;True;True;True;False;True;True;True;True;True;True;True;True;True;True;True	42;59;290;324;338;381;404;485;776;1111;1272;1273;1491;1492;1579;1659;1663;1810;1912;2035;2040;2041;2130;2239;2550;2649	49;70;71;374;418;419;438;488;521;632;987;1426;1625;1626;1902;1903;1904;2005;2106;2107;2113;2295;2434;2590;2595;2596;2710;2849;2850;3253;3378	80;116;117;118;119;593;660;661;693;762;817;1010;1533;2199;2507;2508;2926;2927;2928;2929;3084;3230;3231;3240;3497;3707;3948;3949;3956;3957;3958;4138;4139;4347;4348;4934;4935;5122;5123	80;117;593;660;693;762;817;1010;1533;2199;2507;2928;3084;3231;3240;3497;3707;3948;3958;4138;4347;4934;5123		81;82;199;200;201;202;203			146;153;250;272;275;296;414
sp|P25294|SIS1_YEAST	sp|P25294|SIS1_YEAST	1	1	1	sp|P25294|SIS1_YEAST Protein SIS1 OS=Saccharomyces cerevisiae (strain ATCC 204508 / S288c) GN=SIS1 PE=1 SV=1	1	1	1	1	4	4	4	37.59	352	352	0	8.4079	0.7763	1.2438	NaN	1	0	Median	5048500	3181200	1867400				168	278	TRUE	287	370	588	588
sp|P25367|RNQ1_YEAST	sp|P25367|RNQ1_YEAST	2	2	2	sp|P25367|RNQ1_YEAST [PIN+] prion protein RNQ1 OS=Saccharomyces cerevisiae (strain ATCC 204508 / S288c) GN=RNQ1 PE=1 SV=2	1	2	2	2	7.9	7.9	7.9	42.579	405	405	0	24.314	0.46609	0.75525	3.2757	2	0	Median	107000000	70511000	36923000				169	850;1379	True;True	871;1419	1116;1811	1738;2795	1738;2795		204;205			39;54
sp|P25443|RS2_YEAST	sp|P25443|RS2_YEAST	15	15	15	sp|P25443|RS2_YEAST 40S ribosomal protein S2 OS=Saccharomyces cerevisiae (strain ATCC 204508 / S288c) GN=RPS2 PE=1 SV=3	1	15	15	15	48.4	48.4	48.4	27.449	254	254	0	155.22	0.49821	0.78803	5.9975	23	1	Leave out requantified	6460000000	4200000000	2260000000				170	216;235;552;757;758;794;799;1016;1090;1282;1368;1369;1812;1813;2162	True;True;True;True;True;True;True;True;True;True;True;True;True;True;True	224;243;567;778;779;815;820;1045;1120;1318;1406;1407;1873;1874;2238	290;291;311;312;734;989;990;991;1040;1041;1046;1047;1343;1437;1685;1686;1795;1796;2381;2382;2383;2847;2848	454;455;456;496;497;498;1164;1535;1536;1537;1538;1539;1540;1613;1614;1615;1616;1622;1623;1624;1625;2080;2081;2224;2225;2600;2601;2602;2603;2773;2774;2775;3626;3627;3628;3629;3630;4343;4344;4345;4346	454;496;1164;1536;1540;1616;1622;2081;2224;2600;2773;2775;3626;3629;4346
sp|P25491|MAS5_YEAST	sp|P25491|MAS5_YEAST	10	10	10	sp|P25491|MAS5_YEAST Mitochondrial protein import protein MAS5 OS=Saccharomyces cerevisiae (strain ATCC 204508 / S288c) GN=YDJ1 PE=1 SV=1	1	10	10	10	29.1	29.1	29.1	44.67	409	409	0	63.496	0.57111	0.92615	14.698	10	2	Leave out requantified	538000000	330000000	208000000				171	246;645;674;675;942;1053;1712;2334;2535;2542	True;True;True;True;True;True;True;True;True;True	254;662;692;693;966;1083;1772;2417;2625;2632	323;852;887;888;1235;1236;1389;2246;3074;3350;3358	514;515;1330;1331;1385;1386;1913;1914;2146;3428;4678;4679;5082;5094;5095	514;1331;1385;1386;1913;2146;3428;4679;5082;5094		206;207;208;209			174;177;224;307
sp|P25567|SRO9_YEAST	sp|P25567|SRO9_YEAST	2	2	2	sp|P25567|SRO9_YEAST RNA-binding protein SRO9 OS=Saccharomyces cerevisiae (strain ATCC 204508 / S288c) GN=SRO9 PE=1 SV=2	1	2	2	2	7.1	7.1	7.1	48.059	434	434	0	11.417	0.93558	1.5101	56.89	3	3	Median	114000000	53759000	60260000				172	280;1160	True;True	289;1193	372;373;1526	591;592;2353	592;2353
sp|P25605|ILV6_YEAST	sp|P25605|ILV6_YEAST	1	1	1	sp|P25605|ILV6_YEAST Acetolactate synthase small subunit, mitochondrial OS=Saccharomyces cerevisiae (strain ATCC 204508 / S288c) GN=ILV6 PE=1 SV=2	1	1	1	1	3.9	3.9	3.9	33.986	309	309	0	6.3722	0.39686	0.64213	NaN	1	0	Median	42508000	31559000	10949000				173	1394	TRUE	1435	1828	2817;2818	2818
sp|P25694|CDC48_YEAST	sp|P25694|CDC48_YEAST	2	2	2	sp|P25694|CDC48_YEAST Cell division control protein 48 OS=Saccharomyces cerevisiae (strain ATCC 204508 / S288c) GN=CDC48 PE=1 SV=3	1	2	2	2	4.1	4.1	4.1	91.995	835	835	0	14.546	0.38291	0.62154	0.67647	2	0	Median	7906100	5622500	2283600				174	4;1487	True;True	4;1540	5;1960	6;7;3011	6;3011
sp|P26321|RL5_YEAST	sp|P26321|RL5_YEAST	9	9	9	sp|P26321|RL5_YEAST 60S ribosomal protein L5 OS=Saccharomyces cerevisiae (strain ATCC 204508 / S288c) GN=RPL5 PE=1 SV=4	1	9	9	9	26.9	26.9	26.9	33.714	297	297	0	77.041	0.57176	0.91137	29.588	9	0	Leave out requantified	1880000000	1200000000	679000000				175	30;524;525;687;778;779;840;1224;1994	True;True;True;True;True;True;True;True;True	30;539;540;705;799;800;861;1258;2063	36;699;700;902;903;1018;1019;1102;1103;1606;2626	55;56;1109;1110;1111;1112;1113;1408;1409;1410;1411;1581;1582;1583;1720;1721;2478;2479;4001;4002;4003;4004;4005;4006;4007;4008	55;1110;1112;1410;1581;1582;1720;2479;4003
sp|P26755|RFA3_YEAST	sp|P26755|RFA3_YEAST	1	1	1	sp|P26755|RFA3_YEAST Replication factor A protein 3 OS=Saccharomyces cerevisiae (strain ATCC 204508 / S288c) GN=RFA3 PE=1 SV=1	1	1	1	1	12.3	12.3	12.3	13.816	122	122	0	19.105	0.846	1.3482	NaN	1	0	Median	93845000	50442000	43404000				176	2303	TRUE	2382	3026	4602;4603	4603
sp|P26783|RS5_YEAST	sp|P26783|RS5_YEAST	14	14	14	sp|P26783|RS5_YEAST 40S ribosomal protein S5 OS=Saccharomyces cerevisiae (strain ATCC 204508 / S288c) GN=RPS5 PE=1 SV=3	1	14	14	14	46.7	46.7	46.7	25.038	225	225	0	137.18	0.39094	0.62634	9.0156	27	3	Leave out requantified	12100000000	8510000000	3550000000				177	154;258;768;1048;1082;1377;1660;1661;1722;1786;1787;2137;2409;2505	True;True;True;True;True;True;True;True;True;True;True;True;True;True	162;267;789;1078;1112;1416;1417;1717;1718;1782;1846;1847;2212;2496;2594	205;206;337;338;339;1004;1005;1382;1383;1427;1807;1808;1809;2177;2178;2179;2180;2262;2263;2342;2343;2344;2811;2812;3183;3184;3185;3307;3308	333;334;335;541;542;543;544;1561;1562;1563;2136;2137;2138;2200;2201;2202;2203;2204;2205;2206;2790;2791;2792;2793;3331;3332;3333;3334;3335;3450;3451;3452;3453;3568;3569;3570;4285;4286;4287;4288;4289;4290;4837;4838;4839;4840;4841;5018;5019;5020	335;543;1562;2136;2203;2790;3333;3335;3453;3568;3570;4286;4837;5020		210;211			98;99
sp|P26784|RL16A_YEAST	sp|P26784|RL16A_YEAST	9	5	5	sp|P26784|RL16A_YEAST 60S ribosomal protein L16-A OS=Saccharomyces cerevisiae (strain ATCC 204508 / S288c) GN=RPL16A PE=1 SV=3	1	9	5	5	38.2	23.1	23.1	22.201	199	199	0	63.808	0.56154	0.90884	3.8873	7	2	Leave out requantified	844000000	512000000	332000000				178	1051;1115;1170;1366;2045;2278;2324;2484;2525	False;True;True;False;True;True;True;False;False	1081;1147;1203;1404;2116;2117;2357;2407;2573;2615	1386;1387;1470;1536;1793;2692;2693;2694;2998;3060;3279;3336;3337	2142;2143;2144;2269;2369;2370;2770;2771;4115;4116;4117;4118;4558;4559;4656;4978;4979;5063;5064	2144;2269;2369;2771;4116;4558;4656;4978;5064
sp|P26785|RL16B_YEAST	sp|P26785|RL16B_YEAST	13	13	9	sp|P26785|RL16B_YEAST 60S ribosomal protein L16-B OS=Saccharomyces cerevisiae (strain ATCC 204508 / S288c) GN=RPL16B PE=1 SV=3	1	13	13	9	51	51	35.9	22.249	198	198	0	99.174	0.54104	0.85798	12.569	18	0	Leave out requantified	3580000000	2300000000	1280000000				179	36;889;890;1051;1125;1366;1698;1756;1806;1983;2446;2484;2525	True;True;True;True;True;True;True;True;True;True;True;True;True	37;911;912;1081;1157;1404;1758;1816;1866;2051;2533;2573;2615	44;1165;1166;1167;1168;1386;1387;1483;1484;1793;2231;2303;2304;2370;2371;2610;3231;3279;3336;3337	67;68;69;1806;1807;1808;1809;1810;1811;2142;2143;2144;2289;2290;2291;2292;2770;2771;3408;3508;3509;3510;3608;3609;3610;3611;3979;3980;4903;4904;4978;4979;5063;5064	69;1807;1809;2144;2291;2771;3408;3510;3608;3979;4904;4978;5064
sp|P26786|RS7A_YEAST	sp|P26786|RS7A_YEAST	11	5	5	sp|P26786|RS7A_YEAST 40S ribosomal protein S7-A OS=Saccharomyces cerevisiae (strain ATCC 204508 / S288c) GN=RPS7A PE=1 SV=4	1	11	5	5	50.5	25.3	25.3	21.622	190	190	0	37.065	0.54767	0.87562	9.9077	5	0	Leave out requantified	835000000	532000000	302000000				180	43;104;363;438;439;838;941;952;1202;2178;2567	True;True;False;True;True;False;True;False;False;False;False	44;109;376;453;454;859;965;977;1235;2254;2658	51;133;482;483;589;590;1099;1100;1233;1234;1249;1575;1576;2869;2870;3388	82;216;753;754;755;756;932;933;934;1717;1718;1909;1910;1911;1912;1930;2426;2427;2428;2429;4372;4373;4374;4375;5138	82;216;755;932;933;1718;1909;1930;2428;4374;5138
sp|P27476|NSR1_YEAST	sp|P27476|NSR1_YEAST	6	6	6	sp|P27476|NSR1_YEAST Nuclear localization sequence-binding protein OS=Saccharomyces cerevisiae (strain ATCC 204508 / S288c) GN=NSR1 PE=1 SV=1	1	6	6	6	16.4	16.4	16.4	44.535	414	414	0	50.336	0.70808	1.1445	15.678	8	2	Leave out requantified	343000000	202000000	141000000				181	92;106;815;983;1605;1853	True;True;True;True;True;True	97;112;836;1011;1662;1917	119;120;138;1066;1298;1299;2111;2112;2440	191;192;193;194;195;196;197;198;225;1656;2012;2013;2014;3238;3239;3716	192;225;1656;2014;3238;3716		212			229
sp|P28241|IDH2_YEAST	sp|P28241|IDH2_YEAST	3	3	3	sp|P28241|IDH2_YEAST Isocitrate dehydrogenase [NAD] subunit 2, mitochondrial OS=Saccharomyces cerevisiae (strain ATCC 204508 / S288c) GN=IDH2 PE=1 SV=1	1	3	3	3	11.1	11.1	11.1	39.739	369	369	0	18.747	0.2612	0.42363	32.037	3	2	Median	116000000	90462000	25968000				182	509;1144;1931	True;True;True	524;1176;1996	681;1505;2539	1080;2322;3862	1080;2322;3862
sp|P29311|BMH1_YEAST;sp|P34730|BMH2_YEAST	sp|P29311|BMH1_YEAST;sp|P34730|BMH2_YEAST	3;2	3;2	3;2	sp|P29311|BMH1_YEAST Protein BMH1 OS=Saccharomyces cerevisiae (strain ATCC 204508 / S288c) GN=BMH1 PE=1 SV=4;sp|P34730|BMH2_YEAST Protein BMH2 OS=Saccharomyces cerevisiae (strain ATCC 204508 / S288c) GN=BMH2 PE=1 SV=3	2	3	3	3	16.9	16.9	16.9	30.091	267	267;273	0	29.93	0.65173	1.0614	11.848	3	0	Leave out requantified	100000000	62771000	37655000				183	991;1030;2243	True;True;True	1019;1060;2321	1308;1359;2951	2026;2027;2106;4488;4489	2026;2106;4488
sp|P29453|RL8B_YEAST	sp|P29453|RL8B_YEAST	18	18	4	sp|P29453|RL8B_YEAST 60S ribosomal protein L8-B OS=Saccharomyces cerevisiae (strain ATCC 204508 / S288c) GN=RPL8B PE=1 SV=3	1	18	18	4	56.2	56.2	16.4	28.111	256	256	0	144.96	0.57189	0.90448	12.465	28	5	Leave out requantified	6110000000	3820000000	2280000000				184	37;102;375;1228;1261;1406;1407;1431;1579;1603;1664;1908;2213;2275;2422;2537;2590;2591	True;True;True;True;True;True;True;True;True;True;True;True;True;True;True;True;True;True	38;107;388;1262;1296;1448;1449;1475;1476;1635;1660;1721;1973;2290;2354;2509;2627;2684;2685	45;130;498;499;1611;1612;1657;1843;1844;1845;1880;1881;2072;2073;2108;2109;2184;2185;2512;2513;2914;2915;2995;3202;3203;3352;3419;3420	70;71;212;780;781;782;783;2486;2487;2488;2489;2556;2840;2841;2842;2843;2893;2894;2895;3185;3186;3232;3233;3234;3235;3340;3341;3342;3821;3822;3823;4430;4431;4432;4552;4553;4865;4866;4867;4868;5085;5185;5186;5187	70;212;780;2488;2556;2840;2843;2894;3186;3234;3340;3823;4432;4552;4865;5085;5186;5187		213			173
sp|P30624|LCF1_YEAST;sp|P39002|LCF3_YEAST	sp|P30624|LCF1_YEAST	7;1	7;1	7;1	sp|P30624|LCF1_YEAST Long-chain-fatty-acid--CoA ligase 1 OS=Saccharomyces cerevisiae (strain ATCC 204508 / S288c) GN=FAA1 PE=1 SV=1	2	7	7	7	10.7	10.7	10.7	77.865	700	700;694	0	53.907	0.59554	0.97402	12.846	7	2	Leave out requantified	173000000	99334000	73931000				185	16;218;341;665;1508;2117;2185	True;True;True;True;True;True;True	16;226;353;683;1562;2190;2261	20;293;457;877;1985;2783;2877	35;36;459;720;1368;3046;4244;4384	36;459;720;1368;3046;4244;4384		214			561
sp|P31334|RM09_YEAST	sp|P31334|RM09_YEAST	1	1	1	sp|P31334|RM09_YEAST 54S ribosomal protein L9, mitochondrial OS=Saccharomyces cerevisiae (strain ATCC 204508 / S288c) GN=MRPL9 PE=1 SV=3	1	1	1	1	4.1	4.1	4.1	29.79	269	269	0	9.0696	0.90963	1.4808	NaN	1	0	Median	65721000	34316000	31405000				186	2293	TRUE	2372	3016	4585	4585
sp|P31377|STX8_YEAST	sp|P31377|STX8_YEAST	2	2	2	sp|P31377|STX8_YEAST Syntaxin-8 OS=Saccharomyces cerevisiae (strain ATCC 204508 / S288c) GN=SYN8 PE=1 SV=2	1	2	2	2	5.1	5.1	5.1	29.048	255	255	0	12.861	0.62786	1.0007	2.2718	2	0	Median	53153000	33421000	19731000				187	1161;1162	True;True	1194;1195	1527;1528	2354;2355	2354;2355
sp|P32048|SYKM_YEAST	sp|P32048|SYKM_YEAST	1	1	1	sp|P32048|SYKM_YEAST Lysine--tRNA ligase, mitochondrial OS=Saccharomyces cerevisiae (strain ATCC 204508 / S288c) GN=MSK1 PE=1 SV=3	1	1	1	1	1.2	1.2	1.2	66.127	576	576	1	-2	NaN	NaN	NaN	0	0	Median	0	0	0	#ERROR!			188	1771	TRUE	1831	2321	3532	3532	2			484
sp|P32316|ACH1_YEAST	sp|P32316|ACH1_YEAST	22	22	22	sp|P32316|ACH1_YEAST Acetyl-CoA hydrolase OS=Saccharomyces cerevisiae (strain ATCC 204508 / S288c) GN=ACH1 PE=1 SV=2	1	22	22	22	45.2	45.2	45.2	58.711	526	526	0	216.7	0.32527	0.51141	9.7179	34	2	Leave out requantified	10900000000	8140000000	2790000000				189	49;150;204;236;237;324;380;401;609;632;1101;1229;1350;1351;1446;1529;1988;1989;2146;2305;2464;2495	True;True;True;True;True;True;True;True;True;True;True;True;True;True;True;True;True;True;True;True;True;True	51;158;212;244;245;335;336;394;415;626;649;1132;1263;1388;1389;1493;1494;1584;2056;2057;2058;2222;2384;2552;2553;2584	61;200;275;313;314;433;434;435;436;510;511;534;535;806;807;834;1451;1613;1775;1776;1777;1905;1906;2010;2616;2617;2618;2619;2823;2824;3028;3029;3255;3256;3257;3294	101;320;428;429;430;431;499;500;501;679;680;681;682;683;684;685;686;687;688;689;690;801;802;803;837;838;839;1260;1261;1293;2243;2244;2490;2743;2744;2745;2746;2930;2931;2932;3093;3094;3987;3988;3989;3990;3991;3992;3993;4305;4306;4307;4308;4606;4607;4937;4938;4939;4940;5000;5001	101;320;430;500;501;680;803;838;1261;1293;2243;2490;2743;2746;2932;3094;3990;3993;4308;4607;4940;5000		215;216;217;218;219;220;221			89;233;246;359;368;390;409
sp|P32324|EF2_YEAST	sp|P32324|EF2_YEAST	5	5	5	sp|P32324|EF2_YEAST Elongation factor 2 OS=Saccharomyces cerevisiae (strain ATCC 204508 / S288c) GN=EFT1 PE=1 SV=1	1	5	5	5	8.2	8.2	8.2	93.288	842	842	0	38.038	0.5742	0.93557	14.304	4	2	Median	184000000	112000000	72061000				190	188;350;550;749;2133	True;True;True;True;True	196;362;565;770;2207	255;466;732;980;2804;2805	400;732;1162;1522;4275;4276	400;732;1162;1522;4275		222			478
sp|P32347|DCUP_YEAST	sp|P32347|DCUP_YEAST	4	4	4	sp|P32347|DCUP_YEAST Uroporphyrinogen decarboxylase OS=Saccharomyces cerevisiae (strain ATCC 204508 / S288c) GN=HEM12 PE=1 SV=1	1	4	4	4	10.8	10.8	10.8	41.349	362	362	0	29.243	0.75466	1.2214	15.913	4	1	Leave out requantified	244000000	135000000	109000000				191	473;2316;2455;2562	True;True;True;True	488;2396;2542;2652	636;3045;3242;3381	1019;1020;4631;4921;4922;5127	1019;4631;4921;5127		223;224			95;307
sp|P32473|ODPB_YEAST	sp|P32473|ODPB_YEAST	2	2	2	sp|P32473|ODPB_YEAST Pyruvate dehydrogenase E1 component subunit beta, mitochondrial OS=Saccharomyces cerevisiae (strain ATCC 204508 / S288c) GN=PDB1 PE=1 SV=2	1	2	2	2	7.4	7.4	7.4	40.053	366	366	0	21.045	0.55861	0.90434	2.8173	2	0	Median	82838000	54734000	28103000				192	474;1892	True;True	489;1957	637;2489	1021;1022;3789	1021;3789
sp|P32476|ERG1_YEAST	sp|P32476|ERG1_YEAST	2	2	2	sp|P32476|ERG1_YEAST Squalene monooxygenase OS=Saccharomyces cerevisiae (strain ATCC 204508 / S288c) GN=ERG1 PE=1 SV=2	1	2	2	2	4.6	4.6	4.6	55.125	496	496	0	12.861	0.52209	0.84643	4.3668	2	0	Median	94777000	64432000	30345000				193	1022;1538	True;True	1051;1593	1349;2021	2088;3106	2088;3106		225			62
sp|P32481|IF2G_YEAST	sp|P32481|IF2G_YEAST	1	1	1	sp|P32481|IF2G_YEAST Eukaryotic translation initiation factor 2 subunit gamma OS=Saccharomyces cerevisiae (strain ATCC 204508 / S288c) GN=GCD11 PE=1 SV=1	1	1	1	1	2.1	2.1	2.1	57.865	527	527	0	7.4741	0.42573	0.68108	NaN	1	1	Median	33449000	20696000	12752000				194	1310	TRUE	1347	1723	2657	2657
sp|P32486|KRE6_YEAST	sp|P32486|KRE6_YEAST	2	2	2	sp|P32486|KRE6_YEAST Beta-glucan synthesis-associated protein KRE6 OS=Saccharomyces cerevisiae (strain ATCC 204508 / S288c) GN=KRE6 PE=1 SV=2	1	2	2	2	4.3	4.3	4.3	80.122	720	720	0	17.231	0.64067	1.0296	9.5607	2	0	Median	199000000	120000000	78353000				195	1349;2223	True;True	1387;2300	1774;2927	2742;4450	2742;4450
sp|P32565|RPN2_YEAST	sp|P32565|RPN2_YEAST	11	11	11	sp|P32565|RPN2_YEAST 26S proteasome regulatory subunit RPN2 OS=Saccharomyces cerevisiae (strain ATCC 204508 / S288c) GN=RPN2 PE=1 SV=4	1	11	11	11	10.8	10.8	10.8	104.23	945	945	0	71.131	0.59854	0.97131	50.551	10	2	Leave out requantified	383000000	222000000	160000000				196	139;360;399;754;955;1181;1185;1380;1518;1939;2280	True;True;True;True;True;True;True;True;True;True;True	147;373;413;775;980;1214;1218;1420;1573;2005;2359	187;478;531;986;1252;1550;1555;1812;1998;2550;3000	301;746;832;1532;1935;2389;2390;2395;2796;3066;3880;3881;3882;3883;4561	301;746;832;1532;1935;2389;2395;2796;3066;3881;4561
sp|P32573|SPS19_YEAST	sp|P32573|SPS19_YEAST	3	3	3	sp|P32573|SPS19_YEAST Peroxisomal 2,4-dienoyl-CoA reductase SPS19 OS=Saccharomyces cerevisiae (strain ATCC 204508 / S288c) GN=SPS19 PE=1 SV=4	1	3	3	3	13.4	13.4	13.4	31.109	292	292	0	20.267	0.61305	0.99287	28.902	3	0	Leave out requantified	203000000	108000000	94589000				197	1514;1952;2433	True;True;True	1569;2018;2520	1994;2568;3216	3058;3059;3906;4885	3059;3906;4885
sp|P32582|CBS_YEAST	sp|P32582|CBS_YEAST	2	2	2	sp|P32582|CBS_YEAST Cystathionine beta-synthase OS=Saccharomyces cerevisiae (strain ATCC 204508 / S288c) GN=CYS4 PE=1 SV=1	1	2	2	2	7.5	7.5	7.5	56.021	507	507	0	12.41	0.19835	0.31833	27.956	2	1	Median	29368000	23920000	5447800				198	212;988	True;True	220;1016	285;1305	447;2023	447;2023
sp|P32589|HSP7F_YEAST	sp|P32589|HSP7F_YEAST	9	9	7	sp|P32589|HSP7F_YEAST Heat shock protein homolog SSE1 OS=Saccharomyces cerevisiae (strain ATCC 204508 / S288c) GN=SSE1 PE=1 SV=4	1	9	9	7	15.4	15.4	11.5	77.365	693	693	0	73.379	0.59583	0.94785	12.967	8	2	Leave out requantified	381000000	243000000	138000000				199	40;502;847;1091;1393;1738;2033;2034;2452	True;True;True;True;True;True;True;True;True	41;517;868;1121;1434;1798;2104;2105;2539	48;671;1111;1438;1827;2283;2678;2679;3238	79;1066;1730;2226;2816;3482;4091;4092;4093;4915	79;1066;1730;2226;2816;3482;4091;4093;4915		226			557
sp|P32590|HSP79_YEAST	sp|P32590|HSP79_YEAST	3	1	1	sp|P32590|HSP79_YEAST Heat shock protein homolog SSE2 OS=Saccharomyces cerevisiae (strain ATCC 204508 / S288c) GN=SSE2 PE=1 SV=3	1	3	1	1	4.9	1	1	77.62	693	693	1	-2	0.55257	0.89307	NaN	1	1	Median	8031100	4999600	3031500	#ERROR!			200	847;1454;2033	False;True;False	868;1504;2104	1111;1918;2678	1730;2950;4091;4092	1730;2950;4091		227			662
sp|P32602|SEC17_YEAST	sp|P32602|SEC17_YEAST	10	10	10	sp|P32602|SEC17_YEAST Alpha-soluble NSF attachment protein OS=Saccharomyces cerevisiae (strain ATCC 204508 / S288c) GN=SEC17 PE=1 SV=4	1	10	10	10	36.6	36.6	36.6	32.802	292	292	0	102.44	0.061611	0.098932	96.661	8	8	Median	1540000000	1420000000	120000000				201	108;485;532;722;931;1072;1214;1847;1923;2175	True;True;True;True;True;True;True;True;True;True	114;500;547;740;955;1102;1248;1911;1988;2251	141;649;708;945;1223;1413;1594;2432;2433;2531;2866	229;1039;1124;1474;1898;2182;2464;3705;3706;3849;4368	229;1039;1124;1474;1898;2182;2464;3705;3849;4368
sp|P32828|SLX5_YEAST	sp|P32828|SLX5_YEAST	1	1	1	sp|P32828|SLX5_YEAST E3 ubiquitin-protein ligase complex SLX5-SLX8 subunit SLX5 OS=Saccharomyces cerevisiae (strain ATCC 204508 / S288c) GN=SLX5 PE=1 SV=1	1	1	1	1	3.4	3.4	3.4	71.07	619	619	0	12.591	0.9041	1.4622	NaN	1	0	Median	43443000	23770000	19673000				202	1839	TRUE	1901	2420	3691	3691
sp|P32835|GSP1_YEAST;sp|P32836|GSP2_YEAST	sp|P32835|GSP1_YEAST;sp|P32836|GSP2_YEAST	6;5	6;5	6;5	sp|P32835|GSP1_YEAST GTP-binding nuclear protein GSP1/CNR1 OS=Saccharomyces cerevisiae (strain ATCC 204508 / S288c) GN=GSP1 PE=1 SV=1;sp|P32836|GSP2_YEAST GTP-binding nuclear protein GSP2/CNR2 OS=Saccharomyces cerevisiae (strain ATCC 204508 / S288c) GN=GSP	2	6	6	6	30.1	30.1	30.1	24.81	219	219;220	0	58.444	0.45621	0.72673	5.4726	9	3	Leave out requantified	2030000000	1380000000	645000000				203	595;831;1399;1559;1811;2287	True;True;True;True;True;True	612;852;1441;1614;1872;2366	791;1090;1834;1835;2044;2045;2379;2380;3007	1238;1239;1704;1705;2828;2829;2830;3137;3138;3623;3624;3625;4571;4572	1238;1705;2830;3137;3625;4571
sp|P32867|SSO1_YEAST;sp|P39926|SSO2_YEAST	sp|P32867|SSO1_YEAST;sp|P39926|SSO2_YEAST	1;1	1;1	1;1	sp|P32867|SSO1_YEAST Protein SSO1 OS=Saccharomyces cerevisiae (strain ATCC 204508 / S288c) GN=SSO1 PE=1 SV=2;sp|P39926|SSO2_YEAST Protein SSO2 OS=Saccharomyces cerevisiae (strain ATCC 204508 / S288c) GN=SSO2 PE=1 SV=2	2	1	1	1	3.1	3.1	3.1	33.106	290	290;295	0	6.0551	1.2142	1.9339	NaN	1	0	Median	32306000	14765000	17541000				204	2075	TRUE	2147	2731	4165;4166	4165
sp|P32905|RSSA1_YEAST	sp|P32905|RSSA1_YEAST	7	7	1	sp|P32905|RSSA1_YEAST 40S ribosomal protein S0-A OS=Saccharomyces cerevisiae (strain ATCC 204508 / S288c) GN=RPS0A PE=1 SV=3	1	7	7	1	42.9	42.9	2.8	28.024	252	252	0	72.136	0.53082	0.83463	9.758	8	1	Leave out requantified	5530000000	3590000000	1930000000				205	580;658;913;1397;1620;1831;1934	True;True;True;True;True;True;True	597;676;936;1439;1677;1892;1999	771;772;870;1199;1832;2130;2406;2542	1212;1213;1214;1215;1357;1358;1858;1859;1860;1861;2825;2826;3262;3667;3668;3669;3866;3867	1212;1357;1860;2825;3262;3668;3866
sp|P32939|YPT7_YEAST	sp|P32939|YPT7_YEAST	1	1	1	sp|P32939|YPT7_YEAST GTP-binding protein YPT7 OS=Saccharomyces cerevisiae (strain ATCC 204508 / S288c) GN=YPT7 PE=1 SV=1	1	1	1	1	6.2	6.2	6.2	23.042	208	208	0	8.1656	0.48339	0.7869	NaN	1	0	Median	13562000	9405300	4157100				206	1919	TRUE	1984	2527	3844;3845	3844
sp|P33201|MRT4_YEAST	sp|P33201|MRT4_YEAST	1	1	1	sp|P33201|MRT4_YEAST Ribosome assembly factor MRT4 OS=Saccharomyces cerevisiae (strain ATCC 204508 / S288c) GN=MRT4 PE=1 SV=1	1	1	1	1	3.4	3.4	3.4	27.058	236	236	0	5.9219	0.50562	0.81828	NaN	1	0	Median	42046000	29239000	12807000				207	2201	TRUE	2278	2901	4415	4415
sp|P33297|PRS6A_YEAST	sp|P33297|PRS6A_YEAST	7	7	7	sp|P33297|PRS6A_YEAST 26S protease regulatory subunit 6A OS=Saccharomyces cerevisiae (strain ATCC 204508 / S288c) GN=RPT5 PE=1 SV=3	1	7	7	7	22.1	22.1	22.1	48.255	434	434	0	64.221	0.48099	0.77974	14.761	7	3	Leave out requantified	315000000	208000000	107000000				208	133;347;808;1347;1472;2024;2306	True;True;True;True;True;True;True	140;359;829;1385;1525;2095;2385	177;463;1058;1771;1944;2666;3030	286;728;1645;2738;2984;4065;4608;4609	286;728;1645;2738;2984;4065;4608		228;229;230			58;170;368
sp|P33298|PRS6B_YEAST	sp|P33298|PRS6B_YEAST	4	4	3	sp|P33298|PRS6B_YEAST 26S protease regulatory subunit 6B homolog OS=Saccharomyces cerevisiae (strain ATCC 204508 / S288c) GN=RPT3 PE=1 SV=2	1	4	4	3	13.3	13.3	10.5	47.893	428	428	0	35.733	0.42962	0.68642	9.1481	6	2	Leave out requantified	231000000	154000000	77589000				209	498;784;1427;1465	True;True;True;True	513;805;1470;1517	666;667;1028;1875;1933;1934	1059;1060;1061;1062;1597;2886;2968;2969;2970	1060;1597;2886;2969		231;232			1;360
sp|P33299|PRS7_YEAST	sp|P33299|PRS7_YEAST	7	7	7	sp|P33299|PRS7_YEAST 26S protease regulatory subunit 7 homolog OS=Saccharomyces cerevisiae (strain ATCC 204508 / S288c) GN=RPT1 PE=1 SV=1	1	7	7	7	16.3	16.3	16.3	51.982	467	467	0	52.223	0.38527	0.62296	11.687	6	1	Leave out requantified	294000000	191000000	103000000				210	585;590;1745;2057;2312;2350;2444	True;True;True;True;True;True;True	602;607;1805;2129;2391;2434;2531	778;784;2290;2709;3038;3100;3229	1221;1227;3490;4137;4622;4721;4901	1221;1227;3490;4137;4622;4721;4901		233			172
sp|P33333|PLSC_YEAST	sp|P33333|PLSC_YEAST	1	1	1	sp|P33333|PLSC_YEAST Probable 1-acyl-sn-glycerol-3-phosphate acyltransferase OS=Saccharomyces cerevisiae (strain ATCC 204508 / S288c) GN=SLC1 PE=1 SV=1	1	1	1	1	5.9	5.9	5.9	33.887	303	303	0	8.86	0.63833	1.0432	14.815	2	0	Median	38704000	24060000	14644000				211	979	TRUE	1007	1292;1293	2001;2002	2001
sp|P33336|SKN1_YEAST	sp|P33336|SKN1_YEAST	1	1	1	sp|P33336|SKN1_YEAST Beta-glucan synthesis-associated protein SKN1 OS=Saccharomyces cerevisiae (strain ATCC 204508 / S288c) GN=SKN1 PE=1 SV=1	1	1	1	1	2.3	2.3	2.3	86.24	771	771	0	9.2724	0.56061	0.90625	NaN	1	0	Median	37442000	23294000	14148000				212	1367	TRUE	1405	1794	2772	2772
sp|P33401|PGM1_YEAST	sp|P33401|PGM1_YEAST	3	3	3	sp|P33401|PGM1_YEAST Phosphoglucomutase 1 OS=Saccharomyces cerevisiae (strain ATCC 204508 / S288c) GN=PGM1 PE=1 SV=1	1	3	3	3	7.2	7.2	7.2	63.111	570	570	0	31.365	0.56527	0.9124	6.5425	3	0	Leave out requantified	64876000	41653000	23223000				213	1269;1927;2541	True;True;True	1305;1992;2631	1668;2535;3357	2575;3854;3855;5092;5093	2575;3854;5093
sp|P33442|RS3A1_YEAST	sp|P33442|RS3A1_YEAST	15	4	4	sp|P33442|RS3A1_YEAST 40S ribosomal protein S1-A OS=Saccharomyces cerevisiae (strain ATCC 204508 / S288c) GN=RPS1A PE=1 SV=2	1	15	4	4	58.8	16.1	16.1	28.743	255	255	0	30.357	0.65671	1.0449	24.056	5	3	Median	698000000	401000000	297000000				214	153;287;441;569;594;1120;1252;1338;1555;1816;2214;2294;2453;2468;2469	False;False;False;True;False;True;False;False;False;True;False;False;True;False;False	161;296;456;586;611;1152;1287;1376;1610;1877;2291;2373;2540;2557;2558	203;204;382;592;593;756;757;789;790;1476;1644;1645;1761;2040;2387;2916;3017;3239;3261;3262	331;332;605;937;938;939;940;941;942;943;1195;1196;1235;1236;1237;2277;2278;2535;2536;2537;2538;2723;3128;3129;3636;4433;4434;4586;4587;4588;4589;4590;4591;4916;4917;4946;4947;4948;4949	332;605;942;1195;1237;2277;2537;2723;3128;3636;4434;4589;4916;4946;4948		194;195			103;229
sp|P33892|GCN1_YEAST	sp|P33892|GCN1_YEAST	5	5	5	sp|P33892|GCN1_YEAST eIF-2-alpha kinase activator GCN1 OS=Saccharomyces cerevisiae (strain ATCC 204508 / S288c) GN=GCN1 PE=1 SV=1	1	5	5	5	2.4	2.4	2.4	296.69	2672	2672	0	36.125	0.48542	0.78236	42.251	6	3	Leave out requantified	153000000	90121000	62582000				215	117;893;1404;2074;2302	True;True;True;True;True	124;915;1446;2146;2381	156;1172;1841;2729;2730;3025	252;253;1816;2837;4163;4164;4601	252;1816;2837;4164;4601
sp|P34216|EDE1_YEAST	sp|P34216|EDE1_YEAST	27	27	27	sp|P34216|EDE1_YEAST EH domain-containing and endocytosis protein 1 OS=Saccharomyces cerevisiae (strain ATCC 204508 / S288c) GN=EDE1 PE=1 SV=2	1	27	27	27	25.3	25.3	25.3	150.78	1381	1381	0	300.16	0.66977	1.0586	16.53	29	8	Leave out requantified	2210000000	1430000000	783000000				216	351;437;519;654;659;664;742;1201;1299;1325;1534;1659;1696;1701;1713;1727;1746;1912;1985;2199;2248;2281;2282;2360;2578;2581;2582	True;True;True;True;True;True;True;True;True;True;True;True;True;True;True;True;True;True;True;True;True;True;True;True;True;True;True	363;452;534;672;677;682;763;1234;1335;1363;1589;1716;1756;1761;1773;1787;1806;1977;2053;2276;2326;2360;2361;2445;2670;2674;2675	467;588;693;866;871;876;972;1574;1706;1742;2016;2017;2176;2227;2228;2235;2247;2269;2291;2518;2613;2899;2960;2961;3001;3002;3113;3114;3402;3406;3407	733;931;1097;1351;1352;1359;1360;1367;1512;1513;2425;2627;2701;2702;3100;3101;3329;3330;3402;3403;3412;3413;3429;3430;3461;3491;3492;3830;3831;3984;4413;4505;4506;4507;4562;4563;4737;4738;4739;4740;4741;5160;5166;5167	733;931;1097;1351;1360;1367;1512;2425;2627;2701;3101;3330;3403;3413;3429;3461;3491;3830;3984;4413;4507;4562;4563;4741;5160;5166;5167		234;235;236;237;238			724;843;880;884;1352
sp|P34225|YEL1_YEAST	sp|P34225|YEL1_YEAST	1	1	1	sp|P34225|YEL1_YEAST Guanine-nucleotide exchange factor YEL1 OS=Saccharomyces cerevisiae (strain ATCC 204508 / S288c) GN=YEL1 PE=1 SV=1	1	1	1	1	3.6	3.6	3.6	78.767	687	687	1	-2	NaN	NaN	NaN	0	0	Median	0	0	0	#ERROR!			217	1829	TRUE	1890	2404	3665	3665			5;6;7			191;198;204
sp|P34233|ASH1_YEAST	sp|P34233|ASH1_YEAST	1	1	1	sp|P34233|ASH1_YEAST Transcriptional regulatory protein ASH1 OS=Saccharomyces cerevisiae (strain ATCC 204508 / S288c) GN=ASH1 PE=1 SV=1	1	1	1	1	1.5	1.5	1.5	65.684	588	588	1	-2	NaN	NaN	NaN	0	0	Median	0	0	0	#ERROR!			218	1100	TRUE	1131	1450	2242	2242			8			388
sp|P34241|URB1_YEAST	sp|P34241|URB1_YEAST	3	3	3	sp|P34241|URB1_YEAST Nucleolar pre-ribosomal-associated protein 1 OS=Saccharomyces cerevisiae (strain ATCC 204508 / S288c) GN=URB1 PE=1 SV=2	1	3	3	3	2.7	2.7	2.7	203.28	1764	1764	0	16.24	0.63427	0.96079	3.9802	3	0	Leave out requantified	49531000	31351000	18180000				219	316;1020;2304	True;True;True	326;1049;2383	422;1347;3027	666;2086;4604;4605	666;2086;4605
sp|P34252|SLD2_YEAST	sp|P34252|SLD2_YEAST	1	1	1	sp|P34252|SLD2_YEAST DNA replication regulator SLD2 OS=Saccharomyces cerevisiae (strain ATCC 204508 / S288c) GN=SLD2 PE=1 SV=1	1	1	1	1	2.4	2.4	2.4	52.271	453	453	1	-2	NaN	NaN	NaN	0	0	Median	0	0	0	#ERROR!			220	1641	TRUE	1698	2154	3297	3297	3		9;37	265		264;266
sp|P34760|TSA1_YEAST;sp|Q04120|TSA2_YEAST	sp|P34760|TSA1_YEAST	7;1	7;1	7;1	sp|P34760|TSA1_YEAST Peroxiredoxin TSA1 OS=Saccharomyces cerevisiae (strain ATCC 204508 / S288c) GN=TSA1 PE=1 SV=3	2	7	7	7	47.4	47.4	47.4	21.589	196	196;196	0	45.013	0.5708	0.89944	8.686	7	2	Leave out requantified	512000000	334000000	178000000				221	425;575;723;1386;1530;1613;2088	True;True;True;True;True;True;True	440;592;741;1427;1585;1670;2160	572;764;946;1819;2011;2121;2748	908;1204;1475;2804;2805;3095;3249;4192	908;1204;1475;2805;3095;3249;4192
sp|P35194|UTP20_YEAST	sp|P35194|UTP20_YEAST	1	1	1	sp|P35194|UTP20_YEAST U3 small nucleolar RNA-associated protein 20 OS=Saccharomyces cerevisiae (strain ATCC 204508 / S288c) GN=UTP20 PE=1 SV=3	1	1	1	1	0.5	0.5	0.5	287.56	2493	2493	0	6.1439	0.4496	0.73241	NaN	1	0	Median	3649600	2365600	1284000				222	1328	TRUE	1366	1746	2706	2706
sp|P38711|RS27B_YEAST;sp|P35997|RS27_YEAST	sp|P38711|RS27B_YEAST;sp|P35997|RS27_YEAST	4;4	4;4	4;4	sp|P38711|RS27B_YEAST 40S ribosomal protein S27-B OS=Saccharomyces cerevisiae (strain ATCC 204508 / S288c) GN=RPS27B PE=1 SV=1;sp|P35997|RS27_YEAST 40S ribosomal protein S27-A OS=Saccharomyces cerevisiae (strain ATCC 204508 / S288c) GN=RPS27A PE=1 SV=1	2	4	4	4	46.3	46.3	46.3	8.8653	82	82;82	0	28.378	0.48849	0.77622	5.5422	6	0	Leave out requantified	1450000000	957000000	496000000				223	1341;2056;2182;2395	True;True;True;True	1379;2128;2258;2481	1764;2707;2708;2874;3158;3159	2726;2727;4135;4136;4380;4381;4800;4801;4802	2726;4136;4381;4802
sp|P36008|EF1G2_YEAST	sp|P36008|EF1G2_YEAST	3	3	3	sp|P36008|EF1G2_YEAST Elongation factor 1-gamma 2 OS=Saccharomyces cerevisiae (strain ATCC 204508 / S288c) GN=TEF4 PE=1 SV=1	1	3	3	3	7.3	7.3	7.3	46.52	412	412	0	20.546	0.51654	0.83071	18.823	3	1	Median	186000000	117000000	69008000				224	1271;1657;2499	True;True;True	1307;1714;2588	1670;2173;2174;3299	2577;3326;3327;5007;5008	2577;3327;5007
sp|P36015|YKT6_YEAST	sp|P36015|YKT6_YEAST	7	7	7	sp|P36015|YKT6_YEAST Synaptobrevin homolog YKT6 OS=Saccharomyces cerevisiae (strain ATCC 204508 / S288c) GN=YKT6 PE=1 SV=1	1	7	7	7	40.5	40.5	40.5	22.707	200	200	0	74.675	0.28546	0.46108	182.58	6	6	Median	1030000000	823000000	211000000				225	309;939;1183;1737;1862;2017;2583	True;True;True;True;True;True;True	319;963;1216;1797;1926;2088;2676;2677	408;1231;1552;1553;2281;2282;2449;2657;3408;3409	645;1907;2392;2393;3480;3481;3726;4050;5168;5169	645;1907;2393;3481;3726;4050;5168		239;240			40;142
sp|P36017|VPS21_YEAST	sp|P36017|VPS21_YEAST	1	1	1	sp|P36017|VPS21_YEAST Vacuolar protein sorting-associated protein 21 OS=Saccharomyces cerevisiae (strain ATCC 204508 / S288c) GN=VPS21 PE=1 SV=1	1	1	1	1	5.7	5.7	5.7	23.081	210	210	0	6.134	0.55565	0.89612	NaN	1	0	Median	1105600	707550	398100				226	2065	TRUE	2137	2718	4148	4148
sp|P36049|EBP2_YEAST	sp|P36049|EBP2_YEAST	1	1	1	sp|P36049|EBP2_YEAST rRNA-processing protein EBP2 OS=Saccharomyces cerevisiae (strain ATCC 204508 / S288c) GN=EBP2 PE=1 SV=1	1	1	1	1	2.6	2.6	2.6	49.734	427	427	0	7.8295	0.6486	1.0777	NaN	1	0	Median	2412500	1305500	1107000				227	1461	TRUE	1512	1928	2962	2962		241			91
sp|P36105|RL14A_YEAST;sp|P38754|RL14B_YEAST	sp|P36105|RL14A_YEAST;sp|P38754|RL14B_YEAST	11;9	11;9	11;9	sp|P36105|RL14A_YEAST 60S ribosomal protein L14-A OS=Saccharomyces cerevisiae (strain ATCC 204508 / S288c) GN=RPL14A PE=1 SV=1;sp|P38754|RL14B_YEAST 60S ribosomal protein L14-B OS=Saccharomyces cerevisiae (strain ATCC 204508 / S288c) GN=RPL14B PE=1 SV=1	2	11	11	11	57.2	57.2	57.2	15.167	138	138;138	0	72.593	0.50036	0.80853	15.75	13	4	Leave out requantified	2910000000	1640000000	1270000000				228	15;648;1123;1133;1140;1654;1765;2025;2380;2493;2494	True;True;True;True;True;True;True;True;True;True;True	15;665;666;1155;1165;1172;1711;1825;2096;2466;2582;2583	19;857;858;1481;1493;1500;2170;2315;2667;3139;3140;3291;3292;3293	33;34;1340;1341;1342;2285;2286;2305;2313;2314;3321;3322;3524;4066;4774;4775;4776;4996;4997;4998;4999	33;1340;2285;2305;2313;3321;3524;4066;4774;4996;4997		242			121
sp|P36150|SUMT_YEAST	sp|P36150|SUMT_YEAST	1	1	1	sp|P36150|SUMT_YEAST Uroporphyrinogen-III C-methyltransferase OS=Saccharomyces cerevisiae (strain ATCC 204508 / S288c) GN=MET1 PE=1 SV=1	1	1	1	1	1.7	1.7	1.7	66.124	593	593	0.002597	5.8688	0.49286	0.80583	NaN	1	0	Median	10870000	7080200	3790300				229	144	TRUE	152	193	309	309
sp|P36156|GTO2_YEAST	sp|P36156|GTO2_YEAST	15	15	15	sp|P36156|GTO2_YEAST Glutathione S-transferase omega-like 2 OS=Saccharomyces cerevisiae (strain ATCC 204508 / S288c) GN=ECM4 PE=1 SV=1	1	15	15	15	46.8	46.8	46.8	43.273	370	370	0	118.57	0.61722	0.98188	14.526	22	8	Leave out requantified	3620000000	2190000000	1430000000				230	48;242;593;629;943;951;971;992;1420;1758;1759;1846;2096;2205;2607	True;True;True;True;True;True;True;True;True;True;True;True;True;True;True	50;250;610;646;967;976;999;1020;1462;1818;1819;1910;2168;2282;2702	60;319;787;788;830;831;1237;1247;1248;1279;1280;1309;1863;1864;1865;2306;2307;2308;2431;2758;2759;2905;3445;3446	99;100;507;508;1232;1233;1234;1288;1289;1290;1915;1926;1927;1928;1929;1975;1976;1977;2028;2029;2869;2870;2871;3512;3513;3514;3704;4208;4209;4210;4419;5225;5226	100;507;1233;1290;1915;1928;1976;2028;2870;3512;3514;3704;4208;4419;5225		243			127
sp|P38011|GBLP_YEAST	sp|P38011|GBLP_YEAST	3	3	3	sp|P38011|GBLP_YEAST Guanine nucleotide-binding protein subunit beta-like protein OS=Saccharomyces cerevisiae (strain ATCC 204508 / S288c) GN=ASC1 PE=1 SV=4	1	3	3	3	11	11	11	34.805	319	319	0	20.672	0.42553	0.68828	28.013	3	1	Median	104000000	72639000	31583000				231	26;175;1850	True;True;True	26;183;1914	31;238;2437	50;380;3712	50;380;3712		244			111
sp|P38013|AHP1_YEAST	sp|P38013|AHP1_YEAST	3	3	3	sp|P38013|AHP1_YEAST Peroxiredoxin type-2 OS=Saccharomyces cerevisiae (strain ATCC 204508 / S288c) GN=AHP1 PE=1 SV=4	1	3	3	3	19.9	19.9	19.9	19.114	176	176	0	26.28	0.66335	1.058	12.639	3	1	Plateau	360000000	213000000	148000000				232	583;649;1844	True;True;True	600;667;1908	775;859;2429	1218;1343;1344;3702	1218;1343;3702
sp|P38061|RL32_YEAST	sp|P38061|RL32_YEAST	6	6	6	sp|P38061|RL32_YEAST 60S ribosomal protein L32 OS=Saccharomyces cerevisiae (strain ATCC 204508 / S288c) GN=RPL32 PE=1 SV=1	1	6	6	6	40.8	40.8	40.8	14.771	130	130	0	49.72	0.71814	1.1397	12.044	11	0	Leave out requantified	3270000000	1780000000	1490000000				233	303;715;737;909;2115;2263	True;True;True;True;True;True	312;313;733;758;931;2188;2341	399;400;401;936;937;966;967;1191;1192;2780;2781;2976;2977	630;631;632;633;634;1462;1463;1504;1505;1506;1846;1847;1848;4239;4240;4241;4527;4528;4529;4530	633;1462;1505;1847;4241;4528		245			87
sp|P38077|ATPG_YEAST	sp|P38077|ATPG_YEAST	3	3	3	sp|P38077|ATPG_YEAST ATP synthase subunit gamma, mitochondrial OS=Saccharomyces cerevisiae (strain ATCC 204508 / S288c) GN=ATP3 PE=1 SV=1	1	3	3	3	12.2	12.2	12.2	34.35	311	311	0	25.858	0.51386	0.83432	14.4	3	2	Median	120000000	76587000	43727000				234	257;599;1551	True;True;True	266;616;1606	336;796;2036	540;1246;3124	540;1246;3124
sp|P38111|ATR_YEAST	sp|P38111|ATR_YEAST	4	4	4	sp|P38111|ATR_YEAST Serine/threonine-protein kinase MEC1 OS=Saccharomyces cerevisiae (strain ATCC 204508 / S288c) GN=MEC1 PE=1 SV=1	1	4	4	4	2	2	2	273.34	2368	2368	0	29.49	0.65558	1.0476	28.84	4	2	Median	97411000	58502000	38910000				235	1548;2037;2106;2584	True;True;True;True	1603;2108;2179;2678	2033;2682;2771;3410	3121;4098;4099;4226;5170	3121;4099;4226;5170		246			2034
sp|P38116|ARL1_YEAST	sp|P38116|ARL1_YEAST	2	2	2	sp|P38116|ARL1_YEAST ADP-ribosylation factor-like protein 1 OS=Saccharomyces cerevisiae (strain ATCC 204508 / S288c) GN=ARL1 PE=1 SV=4	1	2	2	2	13.7	13.7	13.7	20.434	183	183	0	12.516	0.59588	0.98068	11.489	2	1	Median	39151000	23718000	15433000				236	948;1669	True;True	972;1727	1242;2192	1921;3353	1921;3353
sp|P38130|KTR3_YEAST	sp|P38130|KTR3_YEAST	1	1	1	sp|P38130|KTR3_YEAST Probable mannosyltransferase KTR3 OS=Saccharomyces cerevisiae (strain ATCC 204508 / S288c) GN=KTR3 PE=1 SV=1	1	1	1	1	2.2	2.2	2.2	47.482	404	404	0.002577	5.7974	0.57338	0.93699	NaN	1	0	Median	9740000	7170200	2569700				237	1594	TRUE	1650	2093	3212	3212
sp|P38132|MCM7_YEAST	sp|P38132|MCM7_YEAST	1	1	1	sp|P38132|MCM7_YEAST DNA replication licensing factor MCM7 OS=Saccharomyces cerevisiae (strain ATCC 204508 / S288c) GN=MCM7 PE=1 SV=4	1	1	1	1	1.9	1.9	1.9	94.942	845	845	0	6.5065	0.6132	0.99353	NaN	1	0	Median	4025700	2383800	1641900				238	1359	TRUE	1397	1786	2760;2761	2760
sp|P38175|RT21_YEAST	sp|P38175|RT21_YEAST	4	4	4	sp|P38175|RT21_YEAST 37S ribosomal protein MRP21, mitochondrial OS=Saccharomyces cerevisiae (strain ATCC 204508 / S288c) GN=MRP21 PE=1 SV=1	1	4	4	4	19.8	19.8	19.8	20.394	177	177	0	25.797	0.65281	1.0638	6.2997	4	0	Leave out requantified	302000000	176000000	126000000				239	482;918;1163;2016	True;True;True;True	497;941;1196;2087	645;1205;1529;2656	1033;1870;2356;2357;2358;2359;4049	1033;1870;2357;4049		247			98
sp|P38230|QOR_YEAST	sp|P38230|QOR_YEAST	1	1	1	sp|P38230|QOR_YEAST Probable quinone oxidoreductase OS=Saccharomyces cerevisiae (strain ATCC 204508 / S288c) GN=ZTA1 PE=1 SV=1	1	1	1	1	2.7	2.7	2.7	37.018	334	334	0	6.143	0.4894	0.8135	NaN	1	1	Median	16438000	10385000	6053300				240	1005	TRUE	1034	1327	2059	2059		248			112
sp|P38249|EIF3A_YEAST	sp|P38249|EIF3A_YEAST	1	1	1	sp|P38249|EIF3A_YEAST Eukaryotic translation initiation factor 3 subunit A OS=Saccharomyces cerevisiae (strain ATCC 204508 / S288c) GN=RPG1 PE=1 SV=1	1	1	1	1	1.8	1.8	1.8	110.34	964	964	0	8.7631	0.69865	1.1161	NaN	1	0	Median	6460700	3673600	2787100				241	1172	TRUE	1205	1538	2372;2373	2373
sp|P38264|PHO88_YEAST	sp|P38264|PHO88_YEAST	2	2	2	sp|P38264|PHO88_YEAST Inorganic phosphate transport protein PHO88 OS=Saccharomyces cerevisiae (strain ATCC 204508 / S288c) GN=PHO88 PE=1 SV=1	1	2	2	2	11.2	11.2	11.2	21.137	188	188	0	13.543	0.61308	0.97436	NaN	1	1	Median	31796000	18451000	13345000				242	1332;2611	True;True	1370;2706	1752;3452	2713;5235	2713;5235		249			72
sp|P38333|ENP1_YEAST	sp|P38333|ENP1_YEAST	15	15	15	sp|P38333|ENP1_YEAST Essential nuclear protein 1 OS=Saccharomyces cerevisiae (strain ATCC 204508 / S288c) GN=ENP1 PE=1 SV=1	1	15	15	15	32.5	32.5	32.5	55.136	483	483	0	166.35	0.63418	1.0144	6.875	16	1	Leave out requantified	2200000000	1320000000	878000000				243	52;274;288;298;521;738;936;1079;1164;1217;1313;1499;1835;1946;2552	True;True;True;True;True;True;True;True;True;True;True;True;True;True;True	54;283;297;307;536;759;960;1109;1197;1251;1350;1553;1896;2012;2642	65;365;383;394;696;968;1228;1424;1530;1597;1727;1975;2412;2559;3369;3370	107;108;582;583;606;622;1100;1101;1507;1903;1904;2197;2360;2361;2467;2468;2663;2664;3030;3679;3680;3896;5110;5111;5112;5113	107;582;606;622;1101;1507;1903;2197;2361;2467;2663;3030;3679;3896;5113
sp|P38351|PAF1_YEAST	sp|P38351|PAF1_YEAST	21	21	21	sp|P38351|PAF1_YEAST RNA polymerase II-associated protein 1 OS=Saccharomyces cerevisiae (strain ATCC 204508 / S288c) GN=PAF1 PE=1 SV=1	1	21	21	21	61.8	61.8	61.8	51.8	445	445	0	315.62	0.57594	0.91888	11.234	33	6	Leave out requantified	5320000000	3260000000	2070000000				244	7;433;503;528;592;628;1105;1180;1291;1292;1295;1439;1752;1793;2099;2103;2104;2195;2313;2400;2588	True;True;True;True;True;True;True;True;True;True;True;True;True;True;True;True;True;True;True;True;True	7;448;518;543;609;645;1136;1213;1327;1328;1331;1484;1812;1853;2172;2176;2177;2271;2272;2392;2487;2682	8;9;582;583;672;673;703;704;786;829;1456;1549;1697;1698;1699;1702;1891;1892;2298;2299;2352;2763;2764;2768;2769;2890;2891;2892;2893;3039;3040;3168;3169;3416	14;15;16;17;922;923;924;1067;1068;1069;1070;1118;1119;1230;1231;1286;1287;2251;2252;2388;2616;2617;2618;2619;2620;2623;2907;2908;3501;3502;3503;3585;4215;4216;4217;4221;4222;4223;4224;4400;4401;4402;4403;4404;4405;4623;4624;4625;4814;4815;4816;4817;5179;5180	16;924;1068;1119;1231;1287;2251;2388;2618;2620;2623;2908;3503;3585;4215;4221;4224;4403;4624;4817;5180		250;251;252;253;254	10		64;69;204;285;351	147
sp|P38353|SSH1_YEAST	sp|P38353|SSH1_YEAST	1	1	1	sp|P38353|SSH1_YEAST Sec sixty-one protein homolog OS=Saccharomyces cerevisiae (strain ATCC 204508 / S288c) GN=SSH1 PE=1 SV=1	1	1	1	1	2.9	2.9	2.9	53.311	490	490	0	6.1326	0.6521	1.0742	NaN	1	0	Median	20309000	11939000	8370000				245	187	TRUE	195	254	399	399
sp|P38431|IF5_YEAST	sp|P38431|IF5_YEAST	2	2	2	sp|P38431|IF5_YEAST Eukaryotic translation initiation factor 5 OS=Saccharomyces cerevisiae (strain ATCC 204508 / S288c) GN=TIF5 PE=1 SV=1	1	2	2	2	5.9	5.9	5.9	45.261	405	405	0	15.089	0.52795	0.8524	34.676	2	0	Median	123000000	77014000	46345000				246	707;1319	True;True	725;1357	928;1736	1450;2684;2685	1450;2684
sp|P38439|LEO1_YEAST	sp|P38439|LEO1_YEAST	21	21	21	sp|P38439|LEO1_YEAST RNA polymerase-associated protein LEO1 OS=Saccharomyces cerevisiae (strain ATCC 204508 / S288c) GN=LEO1 PE=1 SV=1	1	21	21	21	44.2	44.2	44.2	53.919	464	464	0	250.53	0.81606	1.2948	6.929	25	2	Leave out requantified	2870000000	1570000000	1300000000				247	145;403;406;407;414;423;424;463;518;533;535;836;981;1106;1107;1235;1676;1719;1999;2173;2286	True;True;True;True;True;True;True;True;True;True;True;True;True;True;True;True;True;True;True;True;True	153;417;420;421;428;438;439;478;533;548;550;857;1009;1137;1138;1139;1269;1734;1779;2068;2249;2365	194;537;538;543;544;545;546;556;569;570;571;620;621;692;709;711;1097;1295;1457;1458;1459;1620;1621;2200;2201;2258;2632;2864;3006	310;311;842;843;844;845;853;854;855;856;857;858;859;860;861;862;863;864;883;905;906;907;992;993;994;1095;1096;1125;1128;1129;1715;2004;2005;2253;2254;2255;2500;2501;3363;3364;3445;3446;4015;4016;4365;4366;4570	310;844;856;864;883;905;906;994;1095;1125;1129;1715;2005;2253;2255;2501;3363;3445;4015;4366;4570		255;256;257	11;12		118;289;435	105;372
sp|P51996|YPT32_YEAST;sp|P38555|YPT31_YEAST	sp|P51996|YPT32_YEAST;sp|P38555|YPT31_YEAST	1;1	1;1	1;1	sp|P51996|YPT32_YEAST GTP-binding protein YPT32/YPT11 OS=Saccharomyces cerevisiae (strain ATCC 204508 / S288c) GN=YPT32 PE=1 SV=3;sp|P38555|YPT31_YEAST GTP-binding protein YPT31/YPT8 OS=Saccharomyces cerevisiae (strain ATCC 204508 / S288c) GN=YPT31 PE=1 SV	2	1	1	1	6.8	6.8	6.8	24.52	222	222;223	0	14.741	NaN	NaN	NaN	0	0	Median	0	0	0				248	497	TRUE	512	665	1058	1058
sp|P38631|FKS1_YEAST	sp|P38631|FKS1_YEAST	1	1	1	sp|P38631|FKS1_YEAST 1,3-beta-glucan synthase component FKS1 OS=Saccharomyces cerevisiae (strain ATCC 204508 / S288c) GN=FKS1 PE=1 SV=2	1	1	1	1	0.5	0.5	0.5	214.85	1876	1876	0	6.9886	0.63739	1.0312	10.258	2	2	Median	85643000	53391000	32252000				249	1241	TRUE	1276	1629;1630	2511;2512	2511
sp|P38691|KSP1_YEAST	sp|P38691|KSP1_YEAST	20	20	20	sp|P38691|KSP1_YEAST Serine/threonine-protein kinase KSP1 OS=Saccharomyces cerevisiae (strain ATCC 204508 / S288c) GN=KSP1 PE=1 SV=1	1	20	20	20	23.3	23.3	23.3	117.08	1029	1029	0	164.71	0.66674	1.0724	21.318	18	2	Leave out requantified	2100000000	1060000000	1040000000				250	271;277;769;873;1057;1365;1372;1428;1531;1575;1783;1851;1865;1969;2001;2097;2159;2569;2570;2597	True;True;True;True;True;True;True;True;True;True;True;True;True;True;True;True;True;True;True;True	280;286;790;894;1087;1403;1410;1471;1586;1631;1843;1915;1929;2036;2071;2169;2235;2660;2661;2691	355;369;1006;1144;1393;1792;1800;1876;2012;2067;2338;2438;2453;2591;2636;2760;2843;3390;3391;3431	568;569;570;587;1564;1773;2151;2769;2780;2781;2887;3096;3178;3563;3564;3713;3734;3735;3950;3951;4022;4211;4212;4336;4337;5141;5142;5205;5206	569;587;1564;1773;2151;2769;2780;2887;3096;3178;3564;3713;3734;3951;4022;4211;4337;5141;5142;5205		258;259;260	13		247;535;962	903
sp|P39567|IMDH1_YEAST;sp|P50095|IMDH3_YEAST;sp|P38697|IMDH2_YEAST;sp|P50094|IMDH4_YEAST	sp|P39567|IMDH1_YEAST;sp|P50095|IMDH3_YEAST;sp|P38697|IMDH2_YEAST;sp|P50094|IMDH4_YEAST	2;2;2;1	2;2;2;1	2;2;2;1	sp|P39567|IMDH1_YEAST Putative inosine-5-monophosphate dehydrogenase 1 OS=Saccharomyces cerevisiae (strain ATCC 204508 / S288c) GN=IMD1 PE=5 SV=1;sp|P50095|IMDH3_YEAST Inosine-5-monophosphate dehydrogenase 3 OS=Saccharomyces cerevisiae (strain ATCC 20450	4	2	2	2	8.7	8.7	8.7	44.386	403	403;523;523;524	0	21.775	0.43019	0.69871	24.824	2	0	Median	136000000	83875000	51891000				251	514;1583	True;True	529;1639	687;2078	1088;1089;3192;3193	1088;3192
sp|P38701|RS20_YEAST	sp|P38701|RS20_YEAST	7	7	7	sp|P38701|RS20_YEAST 40S ribosomal protein S20 OS=Saccharomyces cerevisiae (strain ATCC 204508 / S288c) GN=RPS20 PE=1 SV=3	1	7	7	7	51.2	51.2	51.2	13.907	121	121	0	121.23	0.23803	0.3811	24.04	10	1	Leave out requantified	2780000000	2230000000	544000000				252	464;1013;1481;1702;2262;2310;2544	True;True;True;True;True;True;True	479;1042;1534;1762;2340;2389;2634	622;623;1338;1339;1954;2236;2975;3035;3036;3360	995;996;997;998;2075;2076;3003;3414;3415;4526;4618;4619;4620;5098;5099	997;2075;3003;3414;4526;4618;5098		261			84
sp|P38708|YHI0_YEAST	sp|P38708|YHI0_YEAST	5	5	5	sp|P38708|YHI0_YEAST Putative proline--tRNA ligase YHR020W OS=Saccharomyces cerevisiae (strain ATCC 204508 / S288c) GN=YHR020W PE=1 SV=1	1	5	5	5	13.8	13.8	13.8	77.385	688	688	0	53.095	0.42122	0.6813	10.013	5	2	Leave out requantified	170000000	112000000	58524000				253	74;1056;1822;1913;2445	True;True;True;True;True	78;1086;1883;1978;2532	96;97;1392;2396;2519;3230	158;159;2150;3649;3650;3832;4902	158;2150;3649;3832;4902		262			651
sp|P38736|GOSR1_YEAST	sp|P38736|GOSR1_YEAST	16	16	16	sp|P38736|GOSR1_YEAST Golgi SNAP receptor complex member 1 OS=Saccharomyces cerevisiae (strain ATCC 204508 / S288c) GN=GOS1 PE=1 SV=1	1	16	16	16	74.9	74.9	74.9	25.394	223	223	0	323.31	0.020861	0.033354	150.29	12	11	Median	8470000000	8320000000	150000000				254	95;450;868;978;1257;1305;1497;1498;1673;1700;1774;1979;2012;2391;2601;2602	True;True;True;True;True;True;True;True;True;True;True;True;True;True;True;True	100;465;889;1006;1292;1341;1551;1552;1731;1760;1834;2047;2083;2477;2695;2696	123;604;1137;1138;1291;1651;1652;1712;1973;1974;2196;2233;2234;2326;2327;2604;2605;2651;2652;3153;3436;3437;3438	202;961;1764;1765;2000;2549;2550;2636;3027;3028;3029;3357;3410;3411;3541;3542;3972;3973;4042;4043;4794;5213;5214;5215	202;961;1764;2000;2550;2636;3027;3029;3357;3411;3541;3973;4043;4794;5213;5215
sp|P38742|NPR3_YEAST	sp|P38742|NPR3_YEAST	3	3	3	sp|P38742|NPR3_YEAST Nitrogen permease regulator 3 OS=Saccharomyces cerevisiae (strain ATCC 204508 / S288c) GN=NPR3 PE=1 SV=1	1	3	3	3	2.9	2.9	2.9	129.97	1146	1146	0	30.033	0.64037	1.0308	16.175	3	1	Median	155000000	87423000	67078000				255	973;1536;2086	True;True;True	1001;1591;2158	1283;1284;2019;2745;2746	1983;1984;3104;4189;4190	1983;3104;4190
sp|P38764|RPN1_YEAST	sp|P38764|RPN1_YEAST	6	6	6	sp|P38764|RPN1_YEAST 26S proteasome regulatory subunit RPN1 OS=Saccharomyces cerevisiae (strain ATCC 204508 / S288c) GN=RPN1 PE=1 SV=3	1	6	6	6	7.7	7.7	7.7	109.49	993	993	0	55.993	0.78088	1.2615	26.227	6	4	Median	317000000	189000000	128000000				256	408;486;515;1259;1732;2216	True;True;True;True;True;True	422;501;530;1294;1792;2293	547;650;688;1654;2275;2918	865;1040;1090;1091;2552;3471;4436	865;1040;1090;2552;3471;4436
sp|P38820|UBA4_YEAST	sp|P38820|UBA4_YEAST	4	4	4	sp|P38820|UBA4_YEAST Adenylyltransferase and sulfurtransferase UBA4 OS=Saccharomyces cerevisiae (strain ATCC 204508 / S288c) GN=UBA4 PE=1 SV=1	1	4	4	4	8.6	8.6	8.6	49.361	440	440	0	29.737	0.81275	1.3017	14.394	4	1	Leave out requantified	130000000	69991000	59922000				257	1199;1311;1631;2540	True;True;True;True	1232;1348;1688;2630	1572;1724;2144;3356	2423;2658;3284;5090;5091	2423;2658;3284;5090
sp|P38861|NMD3_YEAST	sp|P38861|NMD3_YEAST	1	1	1	sp|P38861|NMD3_YEAST 60S ribosomal export protein NMD3 OS=Saccharomyces cerevisiae (strain ATCC 204508 / S288c) GN=NMD3 PE=1 SV=3	1	1	1	1	2.3	2.3	2.3	59.095	518	518	0	8.2628	0.63111	1.0264	NaN	1	0	Median	12998000	7968500	5029600				258	1433	TRUE	1478	1883	2897;2898	2897		263			210
sp|P38886|RPN10_YEAST	sp|P38886|RPN10_YEAST	1	1	1	sp|P38886|RPN10_YEAST 26S proteasome regulatory subunit RPN10 OS=Saccharomyces cerevisiae (strain ATCC 204508 / S288c) GN=RPN10 PE=1 SV=3	1	1	1	1	4.9	4.9	4.9	29.747	268	268	0	6.3771	0.62172	1.0033	NaN	1	0	Median	49496000	31964000	17532000				259	935	TRUE	959	1227	1902	1902
sp|P38929|ATC2_YEAST	sp|P38929|ATC2_YEAST	33	33	33	sp|P38929|ATC2_YEAST Calcium-transporting ATPase 2 OS=Saccharomyces cerevisiae (strain ATCC 204508 / S288c) GN=PMC1 PE=1 SV=1	1	33	33	33	29.8	29.8	29.8	130.86	1173	1173	0	323.31	0.65948	1.0542	9.395	35	2	Leave out requantified	5460000000	3240000000	2220000000				260	228;229;295;337;536;542;608;641;679;733;739;842;859;1134;1208;1289;1354;1478;1482;1483;1501;1546;1560;1592;1593;1628;1665;1826;2036;2101;2132;2323;2481	True;True;True;True;True;True;True;True;True;True;True;True;True;True;True;True;True;True;True;True;True;True;True;True;True;True;True;True;True;True;True;True;True	236;237;304;349;551;557;625;658;697;752;753;760;863;880;1166;1241;1325;1392;1531;1535;1536;1555;1601;1615;1648;1649;1685;1722;1887;2107;2174;2206;2406;2570	303;304;391;453;712;720;805;848;892;893;957;958;969;1106;1127;1494;1585;1695;1780;1951;1955;1956;1977;2031;2046;2090;2091;2092;2140;2186;2401;2681;2766;2803;3059;3276	476;477;478;619;714;1130;1131;1146;1147;1258;1259;1324;1392;1393;1394;1395;1491;1492;1493;1508;1724;1752;2306;2443;2613;2614;2750;2998;2999;3004;3005;3006;3032;3033;3118;3139;3140;3208;3209;3210;3211;3279;3280;3343;3659;3660;4096;4097;4219;4273;4274;4654;4655;4974;4975	476;478;619;714;1130;1147;1259;1324;1394;1491;1508;1724;1752;2306;2443;2614;2750;2998;3005;3006;3032;3118;3140;3208;3211;3279;3343;3659;4096;4219;4274;4655;4974		264;265;266;267;268			292;436;455;760;832
sp|P39015|STM1_YEAST	sp|P39015|STM1_YEAST	17	17	17	sp|P39015|STM1_YEAST Suppressor protein STM1 OS=Saccharomyces cerevisiae (strain ATCC 204508 / S288c) GN=STM1 PE=1 SV=3	1	17	17	17	62.3	62.3	62.3	29.995	273	273	0	240	0.72104	1.1441	8.422	22	1	Leave out requantified	2550000000	1420000000	1120000000				261	34;364;391;394;1039;1074;1118;1532;1569;1642;1901;1902;1962;1963;2081;2082;2410	True;True;True;True;True;True;True;True;True;True;True;True;True;True;True;True;True	35;377;405;408;1069;1104;1150;1587;1625;1699;1966;1967;2028;2029;2153;2154;2497	42;484;522;525;526;1371;1417;1418;1473;2013;2014;2061;2155;2499;2500;2501;2502;2581;2582;2583;2738;2739;2740;3186;3187	65;757;758;818;819;823;824;2120;2121;2187;2188;2189;2190;2272;2273;3097;3098;3168;3298;3800;3801;3802;3803;3804;3805;3806;3807;3808;3809;3925;3926;3927;3928;3929;3930;3931;3932;3933;3934;3935;3936;3937;4177;4178;4179;4180;4842;4843;4844	65;757;819;824;2120;2188;2272;3098;3168;3298;3801;3804;3932;3936;4178;4179;4842
sp|P39076|TCPB_YEAST	sp|P39076|TCPB_YEAST	13	13	13	sp|P39076|TCPB_YEAST T-complex protein 1 subunit beta OS=Saccharomyces cerevisiae (strain ATCC 204508 / S288c) GN=CCT2 PE=1 SV=1	1	13	13	13	35.7	35.7	35.7	57.203	527	527	0	139.33	0.44258	0.71759	11.638	13	4	Leave out requantified	613000000	413000000	201000000				262	193;215;688;946;1155;1167;1340;1708;1922;2051;2254;2394;2428	True;True;True;True;True;True;True;True;True;True;True;True;True	201;223;706;970;1187;1200;1378;1768;1987;2123;2332;2480;2515	260;289;904;1240;1516;1533;1763;2242;2530;2701;2967;3157;3210	406;453;1412;1919;2337;2364;2725;3423;3848;4126;4515;4799;4876	406;453;1412;1919;2337;2364;2725;3423;3848;4126;4515;4799;4876		269;270			409;411
sp|P39077|TCPG_YEAST	sp|P39077|TCPG_YEAST	9	9	9	sp|P39077|TCPG_YEAST T-complex protein 1 subunit gamma OS=Saccharomyces cerevisiae (strain ATCC 204508 / S288c) GN=CCT3 PE=1 SV=2	1	9	9	9	18.7	18.7	18.7	58.814	534	534	0	59.863	0.49192	0.79683	12.064	8	2	Leave out requantified	483000000	318000000	166000000				263	131;803;977;1254;1558;1658;2073;2167;2478	True;True;True;True;True;True;True;True;True	138;824;1005;1289;1613;1715;2145;2243;2567	175;1052;1290;1648;2043;2175;2728;2855;2856;3272	283;1631;1999;2545;3136;3328;4162;4354;4355;4967	283;1631;1999;2545;3136;3328;4162;4354;4967		271			400
sp|P39078|TCPD_YEAST	sp|P39078|TCPD_YEAST	6	6	6	sp|P39078|TCPD_YEAST T-complex protein 1 subunit delta OS=Saccharomyces cerevisiae (strain ATCC 204508 / S288c) GN=CCT4 PE=1 SV=2	1	6	6	6	13.8	13.8	13.8	57.603	528	528	0	43.782	0.4491	0.73281	13.118	6	2	Leave out requantified	219000000	147000000	72135000				264	21;243;261;716;861;1029	True;True;True;True;True;True	21;251;270;734;882;1059	26;320;342;938;1129;1358	45;509;548;1464;1754;2104;2105	45;509;548;1464;1754;2104
sp|P39079|TCPZ_YEAST	sp|P39079|TCPZ_YEAST	4	4	4	sp|P39079|TCPZ_YEAST T-complex protein 1 subunit zeta OS=Saccharomyces cerevisiae (strain ATCC 204508 / S288c) GN=CCT6 PE=1 SV=1	1	4	4	4	9.7	9.7	9.7	59.923	546	546	0	44.838	0.52636	0.85426	27.973	4	2	Median	195000000	116000000	79477000				265	661;714;928;2416	True;True;True;True	679;732;951;2503	873;935;1219;3195	1363;1461;1894;4857	1363;1461;1894;4857		272			304
sp|P39676|FHP_YEAST	sp|P39676|FHP_YEAST	1	1	1	sp|P39676|FHP_YEAST Flavohemoprotein OS=Saccharomyces cerevisiae (strain ATCC 204508 / S288c) GN=YHB1 PE=1 SV=2	1	1	1	1	4.3	4.3	4.3	44.646	399	399	0	6.1293	0.47646	0.77115	NaN	1	1	Median	38604000	26842000	11762000				266	2330	TRUE	2413	3069	4672	4672
sp|P39692|MET10_YEAST	sp|P39692|MET10_YEAST	12	12	12	sp|P39692|MET10_YEAST Sulfite reductase [NADPH] flavoprotein component OS=Saccharomyces cerevisiae (strain ATCC 204508 / S288c) GN=MET10 PE=1 SV=2	1	12	12	12	13.4	13.4	13.4	114.83	1035	1035	0	80.618	0.54186	0.88636	13.046	12	3	Leave out requantified	574000000	354000000	220000000				267	130;300;517;652;901;1517;1648;1724;1871;2078;2255;2299	True;True;True;True;True;True;True;True;True;True;True;True	137;309;532;670;923;1572;1705;1784;1935;2150;2333;2378	174;396;691;863;1181;1997;2161;2265;2460;2735;2968;3022	282;625;626;1094;1348;1833;3064;3065;3306;3456;3744;4172;4516;4517;4597;4598	282;625;1094;1348;1833;3065;3306;3456;3744;4172;4516;4598		273;274			887;977
sp|P39705|NUP60_YEAST	sp|P39705|NUP60_YEAST	2	2	2	sp|P39705|NUP60_YEAST Nucleoporin NUP60 OS=Saccharomyces cerevisiae (strain ATCC 204508 / S288c) GN=NUP60 PE=1 SV=1	1	2	2	2	7.1	7.1	7.1	59.039	539	539	0	10.946	0.59486	0.98018	75.608	2	0	Median	31148000	18727000	12422000				268	1004;1080	True;True	1033;1110	1326;1425	2058;2198	2058;2198
sp|P39923|NPR2_YEAST	sp|P39923|NPR2_YEAST	2	2	2	sp|P39923|NPR2_YEAST Nitrogen permease regulator 2 OS=Saccharomyces cerevisiae (strain ATCC 204508 / S288c) GN=NPR2 PE=1 SV=2	1	2	2	2	3.1	3.1	3.1	69.858	615	615	0	13.453	0.83911	1.3653	29.106	2	1	Median	71734000	30465000	41270000				269	1003;2371	True;True	1032;2457	1325;3128	2056;2057;4760	2056;4760
sp|P39935|IF4F1_YEAST	sp|P39935|IF4F1_YEAST	1	1	1	sp|P39935|IF4F1_YEAST Eukaryotic initiation factor 4F subunit p150 OS=Saccharomyces cerevisiae (strain ATCC 204508 / S288c) GN=TIF4631 PE=1 SV=2	1	1	1	1	1.4	1.4	1.4	107.1	952	952	0	6.2819	0.63574	0.97138	NaN	1	0	Median	721420	428320	293100				270	1747	TRUE	1807	2292	3493;3494	3493
sp|P39938|RS26A_YEAST;sp|P39939|RS26B_YEAST	sp|P39938|RS26A_YEAST;sp|P39939|RS26B_YEAST	5;4	5;4	5;4	sp|P39938|RS26A_YEAST 40S ribosomal protein S26-A OS=Saccharomyces cerevisiae (strain ATCC 204508 / S288c) GN=RPS26A PE=1 SV=1;sp|P39939|RS26B_YEAST 40S ribosomal protein S26-B OS=Saccharomyces cerevisiae (strain ATCC 204508 / S288c) GN=RPS26B PE=1 SV=1	2	5	5	5	38.7	38.7	38.7	13.505	119	119;119	0	37.599	0.70826	1.1369	8.5275	5	0	Leave out requantified	1330000000	761000000	567000000				271	151;308;713;1539;2443	True;True;True;True;True	159;318;731;1594;2530	201;407;934;2022;2023;3227;3228	321;322;323;324;325;326;327;328;329;643;644;1456;1457;1458;1459;1460;3107;3108;3109;4899;4900	326;644;1460;3109;4900
sp|P39954|SAHH_YEAST	sp|P39954|SAHH_YEAST	2	2	2	sp|P39954|SAHH_YEAST Adenosylhomocysteinase OS=Saccharomyces cerevisiae (strain ATCC 204508 / S288c) GN=SAH1 PE=1 SV=1	1	2	2	2	5.1	5.1	5.1	49.125	449	449	0	15.678	0.37944	0.62358	10.246	2	0	Median	58774000	42303000	16471000				272	843;2417	True;True	864;2504	1107;3196	1725;4858	1725;4858
sp|P39985|DPO5_YEAST	sp|P39985|DPO5_YEAST	2	2	2	sp|P39985|DPO5_YEAST DNA polymerase V OS=Saccharomyces cerevisiae (strain ATCC 204508 / S288c) GN=POL5 PE=1 SV=1	1	2	2	2	2.5	2.5	2.5	115.89	1022	1022	0	11.026	0.55297	0.88947	3.1571	2	1	Median	27799000	18446000	9352400				273	2166;2527	True;True	2242;2617	2854;3339	4353;5066	4353;5066
sp|P39990|SNU13_YEAST	sp|P39990|SNU13_YEAST	1	1	1	sp|P39990|SNU13_YEAST 13 kDa ribonucleoprotein-associated protein OS=Saccharomyces cerevisiae (strain ATCC 204508 / S288c) GN=SNU13 PE=1 SV=1	1	1	1	1	6.3	6.3	6.3	13.569	126	126	0	6.3411	0.29953	0.49503	NaN	1	0	Median	15828000	12100000	3727600				274	296	TRUE	305	392	620	620
sp|P40008|FMP52_YEAST	sp|P40008|FMP52_YEAST	15	15	15	sp|P40008|FMP52_YEAST Protein FMP52, mitochondrial OS=Saccharomyces cerevisiae (strain ATCC 204508 / S288c) GN=FMP52 PE=1 SV=1	1	15	15	15	70.6	70.6	70.6	25.086	231	231	0	150.14	0.21009	0.33127	9.5282	20	3	Leave out requantified	5330000000	4390000000	935000000				275	2;290;297;358;488;802;864;1273;1440;1457;1736;2340;2430;2463;2506	True;True;True;True;True;True;True;True;True;True;True;True;True;True;True	2;299;306;371;503;823;885;1309;1485;1507;1508;1796;2423;2517;2551;2595	3;385;393;476;652;653;1050;1051;1132;1133;1673;1893;1922;1923;2280;3082;3083;3212;3213;3254;3309	4;609;610;611;621;744;1042;1043;1628;1629;1630;1757;1758;1759;1760;2581;2582;2583;2909;2910;2911;2912;2954;2955;2956;2957;3477;3478;3479;4694;4695;4879;4880;4881;4882;4936;5021	4;610;621;744;1043;1628;1759;2581;2909;2955;3477;4695;4881;4936;5021		275;276;277			1;64;128
sp|P40010|NUG1_YEAST	sp|P40010|NUG1_YEAST	4	4	4	sp|P40010|NUG1_YEAST Nuclear GTP-binding protein NUG1 OS=Saccharomyces cerevisiae (strain ATCC 204508 / S288c) GN=NUG1 PE=1 SV=1	1	4	4	4	10.4	10.4	10.4	57.708	520	520	0	22.024	0.63251	1.0142	12.613	4	2	Median	87253000	53349000	33904000				276	24;418;1117;1898	True;True;True;True	24;432;1149;1963	29;561;1472;2495	48;891;2271;3796	48;891;2271;3796
sp|P40016|RPN3_YEAST	sp|P40016|RPN3_YEAST	4	4	4	sp|P40016|RPN3_YEAST 26S proteasome regulatory subunit RPN3 OS=Saccharomyces cerevisiae (strain ATCC 204508 / S288c) GN=RPN3 PE=1 SV=5	1	4	4	4	11.7	11.7	11.7	60.392	523	523	0	59.397	0.71078	1.1488	7.7661	5	3	Median	225000000	125000000	101000000				277	178;276;1998;2384	True;True;True;True	186;285;2067;2470	241;367;368;2631;3145	383;585;586;4014;4782	383;585;4014;4782		278;279			7;8
sp|P40069|IMB4_YEAST	sp|P40069|IMB4_YEAST	3	3	3	sp|P40069|IMB4_YEAST Importin subunit beta-4 OS=Saccharomyces cerevisiae (strain ATCC 204508 / S288c) GN=KAP123 PE=1 SV=1	1	3	3	3	4	4	4	122.6	1113	1113	0	27.096	1.872	3.0267	157.07	2	2	Median	88319000	28504000	59815000				278	553;2144;2561	True;True;True	568;2219;2651	735;2820;3380	1165;4301;5126	1165;4301;5126
sp|P40075|SCS2_YEAST	sp|P40075|SCS2_YEAST	1	1	1	sp|P40075|SCS2_YEAST Vesicle-associated membrane protein-associated protein SCS2 OS=Saccharomyces cerevisiae (strain ATCC 204508 / S288c) GN=SCS2 PE=1 SV=3	1	1	1	1	6.1	6.1	6.1	26.925	244	244	0	11.692	0.6032	0.99386	NaN	1	0	Median	18949000	10891000	8058500				279	568	TRUE	585	755	1194	1194
sp|P40089|LSM5_YEAST	sp|P40089|LSM5_YEAST	1	1	1	sp|P40089|LSM5_YEAST U6 snRNA-associated Sm-like protein LSm5 OS=Saccharomyces cerevisiae (strain ATCC 204508 / S288c) GN=LSM5 PE=1 SV=1	1	1	1	1	14	14	14	10.423	93	93	0	8.0008	0.79579	1.2694	0.47051	2	2	Median	11217000	6809000	4407700				280	1935	TRUE	2000	2543;2544	3868;3869	3869
sp|P40150|HSP76_YEAST;sp|P11484|HSP75_YEAST	sp|P40150|HSP76_YEAST;sp|P11484|HSP75_YEAST	28;26	28;26	28;26	sp|P40150|HSP76_YEAST Heat shock protein SSB2 OS=Saccharomyces cerevisiae (strain ATCC 204508 / S288c) GN=SSB2 PE=1 SV=2;sp|P11484|HSP75_YEAST Heat shock protein SSB1 OS=Saccharomyces cerevisiae (strain ATCC 204508 / S288c) GN=SSB1 PE=1 SV=3	2	28	28	28	52.2	52.2	52.2	66.594	613	613;613	0	296.87	0.50497	0.79957	8.9204	37	5	Leave out requantified	7170000000	4710000000	2460000000				281	45;166;202;249;510;589;597;870;871;922;1204;1283;1362;1437;1477;1584;1609;1610;1769;1980;2010;2030;2035;2118;2121;2124;2348;2459	True;True;True;True;True;True;True;True;True;True;True;True;True;True;True;True;True;True;True;True;True;True;True;True;True;True;True;True	46;174;210;257;525;606;614;891;892;945;1237;1319;1400;1482;1530;1640;1666;1667;1829;2048;2081;2101;2106;2191;2192;2195;2198;2431;2547	54;224;271;272;326;682;783;794;1141;1142;1211;1212;1578;1579;1687;1789;1887;1888;1949;1950;2079;2080;2117;2118;2319;2606;2649;2675;2680;2784;2785;2788;2789;2793;3095;3096;3248	88;359;423;424;425;518;519;1081;1082;1226;1244;1769;1770;1771;1879;1880;1881;1882;2431;2432;2433;2604;2765;2902;2903;2996;2997;3194;3195;3244;3245;3246;3529;3530;3974;4039;4040;4086;4087;4094;4095;4245;4246;4250;4251;4257;4258;4712;4713;4714;4715;4928	88;359;423;518;1082;1226;1244;1769;1771;1880;2431;2604;2765;2903;2996;3195;3244;3246;3530;3974;4040;4087;4095;4246;4250;4258;4713;4928		280;281;282			124;129;522
sp|P40157|VID27_YEAST	sp|P40157|VID27_YEAST	1	1	1	sp|P40157|VID27_YEAST Vacuolar import and degradation protein 27 OS=Saccharomyces cerevisiae (strain ATCC 204508 / S288c) GN=VID27 PE=1 SV=1	1	1	1	1	1.2	1.2	1.2	88.845	782	782	0.002571	5.7878	0.64146	1.039	NaN	1	0	Median	40385000	23217000	17168000				282	612	TRUE	629	810	1264	1264
sp|P40212|RL13B_YEAST;sp|Q12690|RL13A_YEAST	sp|P40212|RL13B_YEAST;sp|Q12690|RL13A_YEAST	12;11	12;11	12;11	sp|P40212|RL13B_YEAST 60S ribosomal protein L13-B OS=Saccharomyces cerevisiae (strain ATCC 204508 / S288c) GN=RPL13B PE=1 SV=1;sp|Q12690|RL13A_YEAST 60S ribosomal protein L13-A OS=Saccharomyces cerevisiae (strain ATCC 204508 / S288c) GN=RPL13A PE=1 SV=1	2	12	12	12	58.3	58.3	58.3	22.525	199	199;199	0	128.17	0.69293	1.0926	18.084	16	2	Leave out requantified	5980000000	3460000000	2520000000				283	11;148;206;282;456;705;853;1260;1587;1639;2141;2345	True;True;True;True;True;True;True;True;True;True;True;True	11;156;214;291;471;723;874;1295;1643;1696;2216;2428	13;14;197;198;277;375;610;925;926;1119;1655;1656;2083;2152;2817;3091	22;23;24;25;314;315;316;317;433;434;594;968;969;970;971;972;973;974;975;976;977;1445;1446;1447;1448;1741;2553;2554;2555;3200;3295;4297;4707	22;314;434;594;974;1447;1741;2553;3200;3295;4297;4707
sp|P40215|NDH1_YEAST	sp|P40215|NDH1_YEAST	8	8	8	sp|P40215|NDH1_YEAST External NADH-ubiquinone oxidoreductase 1, mitochondrial OS=Saccharomyces cerevisiae (strain ATCC 204508 / S288c) GN=NDE1 PE=1 SV=1	1	8	8	8	13.6	13.6	13.6	62.773	560	560	0	54.393	0.6135	0.98653	11.27	8	3	Leave out requantified	457000000	260000000	197000000				284	79;454;726;867;1116;1196;1550;2277	True;True;True;True;True;True;True;True	84;469;744;888;1148;1229;1605;2356	105;608;949;1136;1471;1568;2035;2997	171;965;1479;1480;1763;2270;2417;3123;4556;4557	171;965;1479;1763;2270;2417;3123;4556
sp|P40319|ELO3_YEAST	sp|P40319|ELO3_YEAST	2	2	2	sp|P40319|ELO3_YEAST Elongation of fatty acids protein 3 OS=Saccharomyces cerevisiae (strain ATCC 204508 / S288c) GN=ELO3 PE=1 SV=1	1	2	2	2	5.2	5.2	5.2	39.465	345	345	0	24.215	0.46876	0.76714	7.4105	2	0	Median	54210000	35830000	18379000				285	530;1063	True;True	545;1093	706;1402	1121;2165	1121;2165
sp|P40327|PRS4_YEAST	sp|P40327|PRS4_YEAST	4	4	4	sp|P40327|PRS4_YEAST 26S protease regulatory subunit 4 homolog OS=Saccharomyces cerevisiae (strain ATCC 204508 / S288c) GN=RPT2 PE=1 SV=3	1	4	4	4	11.9	11.9	11.9	48.828	437	437	0	38.188	0.66513	1.0481	3.3037	3	0	Plateau	42063000	27309000	14754000				286	190;1544;2271;2353	True;True;True;True	198;1599;2350;2437	257;2028;2988;2989;3103	402;3115;4543;4544;4545;4725	402;3115;4543;4725		283			326
sp|P40341|YTA12_YEAST	sp|P40341|YTA12_YEAST	2	2	2	sp|P40341|YTA12_YEAST Mitochondrial respiratory chain complexes assembly protein YTA12 OS=Saccharomyces cerevisiae (strain ATCC 204508 / S288c) GN=YTA12 PE=1 SV=2	1	2	2	2	3.5	3.5	3.5	93.275	825	825	0	12.083	0.49945	0.8074	45.949	2	0	Median	42735000	24988000	17747000				287	156;499	True;True	164;514	208;668	337;1063	337;1063
sp|P40354|NTA1_YEAST	sp|P40354|NTA1_YEAST	1	1	1	sp|P40354|NTA1_YEAST Protein N-terminal amidase OS=Saccharomyces cerevisiae (strain ATCC 204508 / S288c) GN=NTA1 PE=1 SV=1	1	1	1	1	2.4	2.4	2.4	51.896	457	457	0	6.1908	0.60903	0.98964	NaN	1	0	Median	12505000	7899900	4605300				288	1597	TRUE	1654	2098	3218;3219	3218
sp|P40357|SEC9_YEAST	sp|P40357|SEC9_YEAST	1	1	1	sp|P40357|SEC9_YEAST Protein transport protein SEC9 OS=Saccharomyces cerevisiae (strain ATCC 204508 / S288c) GN=SEC9 PE=1 SV=1	1	1	1	1	2	2	2	73.623	651	651	0	13.652	1.1025	1.7921	NaN	1	1	Median	12679000	5834500	6844100				289	523	TRUE	538	698	1108	1108
sp|P40413|TCPE_YEAST	sp|P40413|TCPE_YEAST	7	7	7	sp|P40413|TCPE_YEAST T-complex protein 1 subunit epsilon OS=Saccharomyces cerevisiae (strain ATCC 204508 / S288c) GN=CCT5 PE=1 SV=3	1	7	7	7	13.3	13.3	13.3	61.913	562	562	0	44.975	0.48153	0.78116	11.162	6	2	Leave out requantified	340000000	234000000	107000000				290	353;865;1001;1034;1153;1290;2258	True;True;True;True;True;True;True	365;886;1030;1064;1185;1326;2336	469;1134;1322;1365;1514;1696;2971	736;1761;2052;2114;2333;2334;2615;4520	736;1761;2052;2114;2333;2615;4520		284			522
sp|P40433|6P21_YEAST	sp|P40433|6P21_YEAST	41	41	41	sp|P40433|6P21_YEAST 6-phosphofructo-2-kinase 1 OS=Saccharomyces cerevisiae (strain ATCC 204508 / S288c) GN=PFK26 PE=1 SV=1	1	41	41	41	58	58	58	93.416	827	827	0	323.31	0.69737	1.1107	9.6434	52	4	Leave out requantified	11500000000	6630000000	4860000000				291	20;220;371;435;445;561;622;743;874;897;980;984;1207;1231;1336;1396;1434;1444;1570;1601;1689;1733;1782;1784;1790;1868;1873;1964;1995;1996;2000;2142;2224;2328;2361;2375;2424;2480;2579;2593;2603	True;True;True;True;True;True;True;True;True;True;True;True;True;True;True;True;True;True;True;True;True;True;True;True;True;True;True;True;True;True;True;True;True;True;True;True;True;True;True;True;True	20;228;384;450;460;576;639;764;895;919;1008;1012;1240;1265;1374;1437;1438;1479;1489;1490;1626;1658;1748;1793;1842;1844;1850;1932;1937;2030;2031;2064;2065;2069;2070;2217;2301;2411;2446;2461;2511;2569;2671;2672;2687;2697;2698	24;25;295;493;585;586;599;744;822;973;1145;1176;1294;1300;1301;1583;1584;1615;1616;1757;1758;1830;1831;1884;1900;1901;2062;2104;2105;2217;2218;2276;2336;2337;2339;2349;2456;2463;2464;2584;2585;2627;2628;2629;2633;2634;2635;2818;2928;3066;3115;3116;3133;3205;3275;3403;3404;3423;3439;3440	42;43;44;461;462;769;770;771;772;927;928;951;952;1177;1178;1276;1277;1514;1774;1775;1822;1823;2003;2015;2016;2017;2018;2019;2440;2441;2442;2492;2493;2494;2719;2720;2821;2822;2823;2824;2899;2923;2924;2925;3169;3170;3171;3226;3227;3228;3229;3388;3389;3390;3472;3560;3561;3562;3565;3581;3738;3749;3750;3751;3752;3938;3939;3940;3941;4009;4010;4011;4017;4018;4019;4020;4021;4298;4299;4451;4667;4742;4743;…	44;461;770;927;951;1177;1276;1514;1775;1822;2003;2015;2442;2493;2720;2821;2899;2925;3169;3226;3390;3472;3560;3565;3581;3738;3750;3939;4009;4010;4019;4299;4451;4667;4744;4767;4870;4973;5161;5191;5216		285;286;287;288;289;290;291;292	14;15;16		128;188;365;448;494;506;540;721	652;656;667
sp|P40509|COPE_YEAST	sp|P40509|COPE_YEAST	1	1	1	sp|P40509|COPE_YEAST Coatomer subunit epsilon OS=Saccharomyces cerevisiae (strain ATCC 204508 / S288c) GN=SEC28 PE=1 SV=2	1	1	1	1	3.4	3.4	3.4	33.829	296	296	0	7.6836	0.054471	0.088778	NaN	1	1	Median	57371000	53513000	3857400				292	1533	TRUE	1588	2015	3099	3099
sp|P87262|RL34A_YEAST;sp|P40525|RL34B_YEAST	sp|P87262|RL34A_YEAST;sp|P40525|RL34B_YEAST	3;3	3;3	3;3	sp|P87262|RL34A_YEAST 60S ribosomal protein L34-A OS=Saccharomyces cerevisiae (strain ATCC 204508 / S288c) GN=RPL34A PE=1 SV=1;sp|P40525|RL34B_YEAST 60S ribosomal protein L34-B OS=Saccharomyces cerevisiae (strain ATCC 204508 / S288c) GN=RPL34B PE=1 SV=1	2	3	3	3	26.4	26.4	26.4	13.639	121	121;121	0	30.803	0.70409	1.1142	6.1965	6	0	Leave out requantified	3240000000	1840000000	1400000000				293	50;232;1761	True;True;True	52;240;1821	62;63;307;308;2310;2311	102;103;104;105;481;482;483;484;3517;3518;3519	103;483;3518
sp|P40850|MKT1_YEAST	sp|P40850|MKT1_YEAST	1	1	1	sp|P40850|MKT1_YEAST Protein MKT1 OS=Saccharomyces cerevisiae (strain ATCC 204508 / S288c) GN=MKT1 PE=1 SV=2	1	1	1	1	1.1	1.1	1.1	94.493	830	830	1	-2	NaN	NaN	NaN	0	0	Median	0	0	0	#ERROR!			294	1385	TRUE	1426	1818	2803	2803			17;18;38			389;390;391
sp|P40988|FET4_YEAST	sp|P40988|FET4_YEAST	9	9	9	sp|P40988|FET4_YEAST Low-affinity Fe(2+) transport protein OS=Saccharomyces cerevisiae (strain ATCC 204508 / S288c) GN=FET4 PE=1 SV=2	1	9	9	9	18.1	18.1	18.1	62.791	552	552	0	77.58	0.56588	0.91236	6.0307	8	1	Leave out requantified	884000000	562000000	323000000				295	149;250;627;807;1026;1356;1729;1762;2157	True;True;True;True;True;True;True;True;True	157;258;644;828;1055;1394;1789;1822;2233	199;327;828;1057;1353;1782;2271;2312;2840	318;319;520;521;522;1284;1285;1643;1644;2094;2095;2096;2754;3463;3520;4330;4331	318;520;1284;1643;2094;2754;3463;3520;4330		293;294			148;313
sp|P41056|RL33B_YEAST	sp|P41056|RL33B_YEAST	5	5	1	sp|P41056|RL33B_YEAST 60S ribosomal protein L33-B OS=Saccharomyces cerevisiae (strain ATCC 204508 / S288c) GN=RPL33B PE=1 SV=2	1	5	5	1	39.3	39.3	15	12.168	107	107	0	43.306	0.51262	0.8082	11.074	6	1	Leave out requantified	1360000000	898000000	463000000				296	880;891;1799;2109;2406	True;True;True;True;True	902;913;1859;2182;2493	1153;1169;2362;2363;2774;3178;3179	1787;1788;1812;3599;3600;4230;4830;4831;4832	1787;1812;3599;4230;4832
sp|P41057|RS29A_YEAST	sp|P41057|RS29A_YEAST	6	5	5	sp|P41057|RS29A_YEAST 40S ribosomal protein S29-A OS=Saccharomyces cerevisiae (strain ATCC 204508 / S288c) GN=RPS29A PE=1 SV=3	1	6	5	5	69.6	50	50	6.6606	56	56	0	38.457	0.70091	1.1099	15.684	8	2	Leave out requantified	4950000000	2880000000	2070000000				297	77;135;458;1137;2289;2538	False;True;True;True;True;True	82;142;473;1169;2368;2628	102;180;181;613;1497;3009;3010;3353;3354	165;166;290;291;292;293;982;983;2310;4574;4575;4576;5086;5087;5088	165;292;982;2310;4576;5086
sp|P41058|RS29B_YEAST	sp|P41058|RS29B_YEAST	6	6	5	sp|P41058|RS29B_YEAST 40S ribosomal protein S29-B OS=Saccharomyces cerevisiae (strain ATCC 204508 / S288c) GN=RPS29B PE=1 SV=3	1	6	6	5	69.6	69.6	50	6.7276	56	56	0	50.274	0.68518	1.0882	4.4847	8	0	Leave out requantified	2600000000	1160000000	1440000000				298	77;134;457;1135;2290;2521	True;True;True;True;True;True	82;141;472;1167;2369;2610	102;178;179;611;612;1495;3011;3012;3330	165;166;287;288;289;978;979;980;981;2307;2308;4577;4578;4579;5055;5056	165;287;980;2307;4578;5056
sp|P41805|RL10_YEAST	sp|P41805|RL10_YEAST	15	15	15	sp|P41805|RL10_YEAST 60S ribosomal protein L10 OS=Saccharomyces cerevisiae (strain ATCC 204508 / S288c) GN=RPL10 PE=1 SV=1	1	15	15	15	48.9	48.9	48.9	25.361	221	221	0	125.89	0.65393	1.0308	5.604	21	2	Leave out requantified	6330000000	3680000000	2650000000				299	333;334;366;367;379;421;690;763;1076;1447;2149;2296;2500;2551;2571	True;True;True;True;True;True;True;True;True;True;True;True;True;True;True	345;346;379;380;393;436;708;784;1106;1495;1496;2225;2375;2589;2641;2662;2663	447;448;449;450;486;487;508;509;566;567;906;998;1420;1907;1908;1909;2828;2829;3019;3300;3368;3392;3393;3394	706;707;708;709;710;760;761;797;798;799;800;899;900;901;902;1415;1416;1551;1552;2192;2933;2934;2935;2936;2937;2938;4313;4314;4315;4594;5009;5108;5109;5143;5144;5145;5146;5147	709;710;760;761;799;900;1415;1551;2192;2936;4313;4594;5009;5109;5145		295;296			76;102
sp|P41810|COPB_YEAST	sp|P41810|COPB_YEAST	7	7	7	sp|P41810|COPB_YEAST Coatomer subunit beta OS=Saccharomyces cerevisiae (strain ATCC 204508 / S288c) GN=SEC26 PE=1 SV=2	1	7	7	7	10.2	10.2	10.2	109.02	973	973	0	49.739	0.22309	0.36423	43.82	5	5	Median	166000000	134000000	32754000				300	138;491;1236;1378;1480;2253;2383	True;True;True;True;True;True;True	146;506;1270;1418;1533;2331;2469	186;657;1622;1810;1953;2966;3144	300;1048;2502;2794;3002;4514;4781	300;1048;2502;2794;3002;4514;4781
sp|P41811|COPB2_YEAST	sp|P41811|COPB2_YEAST	2	2	2	sp|P41811|COPB2_YEAST Coatomer subunit beta OS=Saccharomyces cerevisiae (strain ATCC 204508 / S288c) GN=SEC27 PE=1 SV=1	1	2	2	2	2.4	2.4	2.4	99.444	889	889	0	12.08	0.22398	0.36545	3.7338	2	1	Median	75855000	56567000	19289000				301	118;2465	True;True	125;2554	157;3258	254;4941	254;4941
sp|P41940|MPG1_YEAST	sp|P41940|MPG1_YEAST	3	3	3	sp|P41940|MPG1_YEAST Mannose-1-phosphate guanyltransferase OS=Saccharomyces cerevisiae (strain ATCC 204508 / S288c) GN=PSA1 PE=1 SV=2	1	3	3	3	9.7	9.7	9.7	39.565	361	361	0	20.917	0.24668	0.39991	2.8576	2	0	Median	114000000	92071000	21856000				302	543;903;1147	True;True;True	558;925;1179	721;1183;1508	1148;1836;2326	1148;1836;2326
sp|P42935|ELP2_YEAST	sp|P42935|ELP2_YEAST	1	1	1	sp|P42935|ELP2_YEAST Elongator complex protein 2 OS=Saccharomyces cerevisiae (strain ATCC 204508 / S288c) GN=ELP2 PE=1 SV=1	1	1	1	1	0.9	0.9	0.9	89.409	788	788	1	-2	NaN	NaN	NaN	0	0	Median	0	0	0	#ERROR!			303	793	TRUE	814	1039	1612	1612	4			56
sp|P42943|TCPH_YEAST	sp|P42943|TCPH_YEAST	7	7	7	sp|P42943|TCPH_YEAST T-complex protein 1 subunit eta OS=Saccharomyces cerevisiae (strain ATCC 204508 / S288c) GN=CCT7 PE=1 SV=1	1	7	7	7	15.5	15.5	15.5	59.735	550	550	0	54.378	0.5072	0.82599	12.924	7	4	Leave out requantified	291000000	184000000	106000000				304	672;1258;1455;1753;1921;2119;2232	True;True;True;True;True;True;True	690;1293;1505;1813;1986;2193;2310	885;1653;1919;2300;2529;2786;2939	1382;2551;2951;3504;3847;4247;4470	1382;2551;2951;3504;3847;4247;4470		297;298;299			1;398;418
sp|P43588|RPN11_YEAST	sp|P43588|RPN11_YEAST	3	3	3	sp|P43588|RPN11_YEAST Ubiquitin carboxyl-terminal hydrolase RPN11 OS=Saccharomyces cerevisiae (strain ATCC 204508 / S288c) GN=RPN11 PE=1 SV=1	1	3	3	3	11.1	11.1	11.1	34.398	306	306	0	22.959	0.34223	0.56317	42.074	3	1	Median	99301000	74948000	24353000				305	191;1239;2475	True;True;True	199;1274;2564	258;1627;3268	403;2509;4960	403;2509;4960
sp|P43616|DUG1_YEAST	sp|P43616|DUG1_YEAST	2	2	2	sp|P43616|DUG1_YEAST Cys-Gly metallodipeptidase DUG1 OS=Saccharomyces cerevisiae (strain ATCC 204508 / S288c) GN=DUG1 PE=1 SV=1	1	2	2	2	5.4	5.4	5.4	52.871	481	481	0	26.528	0.44727	0.72163	53.513	2	2	Median	86118000	54935000	31183000				306	947;1878	True;True	971;1943	1241;2470	1920;3759	1920;3759		300			270
sp|P43621|COPD_YEAST	sp|P43621|COPD_YEAST	1	1	1	sp|P43621|COPD_YEAST Coatomer subunit delta OS=Saccharomyces cerevisiae (strain ATCC 204508 / S288c) GN=RET2 PE=1 SV=3	1	1	1	1	1.8	1.8	1.8	60.627	546	546	0.002604	5.8718	NaN	NaN	NaN	0	0	Median	2499300	2499300	0				307	1541	TRUE	1596	2025	3112	3112
sp|P43682|SFT1_YEAST	sp|P43682|SFT1_YEAST	2	2	2	sp|P43682|SFT1_YEAST Protein transport protein SFT1 OS=Saccharomyces cerevisiae (strain ATCC 204508 / S288c) GN=SFT1 PE=1 SV=1	1	2	2	2	18.6	18.6	18.6	10.96	97	97	0	15.035	0.039585	0.063783	123.8	2	2	Median	76721000	74030000	2690200				308	1086;2600	True;True	1116;2694	1431;3435	2216;5211;5212	2216;5211
sp|P46654|RSSA2_YEAST	sp|P46654|RSSA2_YEAST	7	1	1	sp|P46654|RSSA2_YEAST 40S ribosomal protein S0-B OS=Saccharomyces cerevisiae (strain ATCC 204508 / S288c) GN=RPS0B PE=1 SV=2	1	7	1	1	42.9	2.8	2.8	27.962	252	252	0	5.9013	0.55525	0.87877	5.5186	2	0	Median	872000000	556000000	316000000				309	580;658;913;1179;1397;1620;1934	False;False;False;True;False;False;False	597;676;936;1212;1439;1677;1999	771;772;870;1199;1547;1548;1832;2130;2542	1212;1213;1214;1215;1357;1358;1858;1859;1860;1861;2385;2386;2387;2825;2826;3262;3866;3867	1212;1357;1860;2385;2825;3262;3866
sp|P46784|RS10B_YEAST;sp|Q08745|RS10A_YEAST	sp|P46784|RS10B_YEAST;sp|Q08745|RS10A_YEAST	4;3	4;3	4;3	sp|P46784|RS10B_YEAST 40S ribosomal protein S10-B OS=Saccharomyces cerevisiae (strain ATCC 204508 / S288c) GN=RPS10B PE=1 SV=1;sp|Q08745|RS10A_YEAST 40S ribosomal protein S10-A OS=Saccharomyces cerevisiae (strain ATCC 204508 / S288c) GN=RPS10A PE=1 SV=1	2	4	4	4	35.2	35.2	35.2	12.738	105	105;105	0	27.024	0.56117	0.89767	13.104	6	1	Leave out requantified	465000000	293000000	172000000				310	129;809;912;1581	True;True;True;True	136;830;935;1637	172;173;1059;1060;1198;2076	278;279;280;281;1646;1647;1648;1856;1857;3190	279;1648;1856;3190
sp|P46990|RL17B_YEAST	sp|P46990|RL17B_YEAST	7	7	1	sp|P46990|RL17B_YEAST 60S ribosomal protein L17-B OS=Saccharomyces cerevisiae (strain ATCC 204508 / S288c) GN=RPL17B PE=1 SV=2	1	7	7	1	45.7	45.7	5.4	20.551	184	184	0	72.766	0.71091	1.1308	4.7779	11	2	Leave out requantified	8030000000	4690000000	3340000000				311	540;635;670;1421;2530;2534;2555	True;True;True;True;True;True;True	555;652;688;1463;2620;2624;2645	718;838;839;882;883;1866;1867;3343;3349;3373;3374	1143;1144;1299;1300;1301;1302;1377;1378;1379;1380;2872;2873;2874;5070;5080;5081;5116;5117	1144;1302;1377;2873;5070;5081;5117
sp|P47006|RPA34_YEAST	sp|P47006|RPA34_YEAST	13	13	13	sp|P47006|RPA34_YEAST DNA-directed RNA polymerase I subunit RPA34 OS=Saccharomyces cerevisiae (strain ATCC 204508 / S288c) GN=RPA34 PE=1 SV=1	1	13	13	13	60.9	60.9	60.9	26.875	233	233	0	169.94	0.75787	1.2091	19.718	27	0	Leave out requantified	19900000000	11100000000	8790000000				312	315;362;639;963;974;1197;1521;1522;1731;1875;1937;1938;2329	True;True;True;True;True;True;True;True;True;True;True;True;True	325;375;656;988;989;990;1002;1230;1576;1577;1791;1940;2002;2003;2004;2412	420;421;481;844;845;1263;1264;1265;1266;1267;1268;1285;1286;1569;1570;2001;2002;2003;2273;2274;2467;2546;2547;2548;2549;3067;3068	662;663;664;665;752;1310;1311;1312;1313;1314;1315;1316;1317;1318;1319;1951;1952;1953;1954;1955;1956;1957;1958;1959;1960;1961;1985;1986;1987;2418;2419;2420;2421;3071;3072;3073;3074;3075;3076;3077;3078;3079;3080;3081;3466;3467;3468;3469;3470;3756;3872;3873;3874;3875;3876;3877;3878;3879;4668;4669;4670;4671	665;752;1318;1959;1987;2420;3075;3080;3470;3756;3874;3878;4670		301;302;303			80;90;107
sp|P47079|TCPQ_YEAST	sp|P47079|TCPQ_YEAST	11	11	11	sp|P47079|TCPQ_YEAST T-complex protein 1 subunit theta OS=Saccharomyces cerevisiae (strain ATCC 204508 / S288c) GN=CCT8 PE=1 SV=1	1	11	11	11	22.5	22.5	22.5	61.662	568	568	0	82.673	0.44635	0.71711	6.6133	11	3	Leave out requantified	709000000	490000000	219000000				313	82;152;777;964;1218;1277;1675;2197;2288;2393;2536	True;True;True;True;True;True;True;True;True;True;True	87;160;798;991;1252;1313;1733;2274;2367;2479;2626	108;202;1017;1269;1598;1680;2199;2896;3008;3155;3156;3351	175;176;330;1580;1962;2469;2470;2593;3362;4408;4409;4573;4797;4798;5083;5084	175;330;1580;1962;2470;2593;3362;4408;4573;4798;5083		304;305			87;213
sp|P47083|MPP10_YEAST	sp|P47083|MPP10_YEAST	1	1	1	sp|P47083|MPP10_YEAST U3 small nucleolar RNA-associated protein MPP10 OS=Saccharomyces cerevisiae (strain ATCC 204508 / S288c) GN=MPP10 PE=1 SV=1	1	1	1	1	1.3	1.3	1.3	66.952	593	593	0	6.5254	0.75512	1.2193	NaN	1	0	Median	7922700	4575700	3346900				314	1860	TRUE	1924	2447	3723;3724	3723
sp|P47120|DOHH_YEAST	sp|P47120|DOHH_YEAST	1	1	1	sp|P47120|DOHH_YEAST Deoxyhypusine hydroxylase OS=Saccharomyces cerevisiae (strain ATCC 204508 / S288c) GN=LIA1 PE=1 SV=1	1	1	1	1	4.6	4.6	4.6	36.164	325	325	0	7.7484	0.69898	1.151	NaN	1	0	Median	15453000	8935000	6518400				315	260	TRUE	269	341	546;547	547
sp|P47169|MET5_YEAST	sp|P47169|MET5_YEAST	2	2	2	sp|P47169|MET5_YEAST Sulfite reductase [NADPH] subunit beta OS=Saccharomyces cerevisiae (strain ATCC 204508 / S288c) GN=MET5 PE=1 SV=1	1	2	2	2	2.4	2.4	2.4	161.22	1442	1442	0	12.558	0.44474	0.70072	6.2906	3	2	Median	41250000	28220000	13029000				316	619;2084	True;True	636;2156	818;2742;2743	1272;4184;4185	1272;4185
sp|P48164|RS7B_YEAST	sp|P48164|RS7B_YEAST	11	11	5	sp|P48164|RS7B_YEAST 40S ribosomal protein S7-B OS=Saccharomyces cerevisiae (strain ATCC 204508 / S288c) GN=RPS7B PE=1 SV=1	1	11	11	5	57.9	57.9	32.6	21.634	190	190	0	91.228	0.60071	0.94936	8.6495	14	4	Leave out requantified	3320000000	1790000000	1520000000				317	29;363;838;952;956;1202;1693;2110;2178;2369;2567	True;True;True;True;True;True;True;True;True;True;True	29;376;859;977;981;1235;1752;2183;2254;2454;2455;2658	35;482;483;1099;1100;1249;1253;1575;1576;2222;2775;2869;2870;3125;3126;3388	54;753;754;755;756;1717;1718;1930;1936;1937;2426;2427;2428;2429;3395;4231;4232;4372;4373;4374;4375;4755;4756;4757;5138	54;755;1718;1930;1936;2428;3395;4232;4374;4756;5138		306			129
sp|P48589|RS12_YEAST	sp|P48589|RS12_YEAST	6	6	6	sp|P48589|RS12_YEAST 40S ribosomal protein S12 OS=Saccharomyces cerevisiae (strain ATCC 204508 / S288c) GN=RPS12 PE=1 SV=1	1	6	6	6	33.6	33.6	33.6	15.471	143	143	0	53.495	0.54812	0.87878	5.0686	6	0	Leave out requantified	1220000000	785000000	438000000				318	1129;1391;1392;1705;2077;2472	True;True;True;True;True;True	1161;1432;1433;1765;2149;2561	1489;1824;1825;1826;2239;2734;3265	2300;2811;2812;2813;2814;2815;3419;3420;4170;4171;4954	2300;2811;2815;3420;4171;4954
sp|P48813|GNP1_YEAST	sp|P48813|GNP1_YEAST	1	1	1	sp|P48813|GNP1_YEAST High-affinity glutamine permease OS=Saccharomyces cerevisiae (strain ATCC 204508 / S288c) GN=GNP1 PE=1 SV=2	1	1	1	1	2.4	2.4	2.4	73.597	663	663	0	20.582	0.5785	0.92433	NaN	1	1	Median	25300000	15683000	9617300				319	1690	TRUE	1749	2219	3391	3391
sp|P49166|RL37A_YEAST	sp|P49166|RL37A_YEAST	3	3	3	sp|P49166|RL37A_YEAST 60S ribosomal protein L37-A OS=Saccharomyces cerevisiae (strain ATCC 204508 / S288c) GN=RPL37A PE=1 SV=2	1	3	3	3	31.8	31.8	31.8	9.8502	88	88	0	19.453	0.75631	1.2313	9.9866	3	0	Leave out requantified	204000000	114000000	90169000				320	1526;2059;2091	True;True;True	1581;2131;2163	2007;2711;2752	3086;4140;4141;4199	3086;4140;4199
sp|P49167|RL38_YEAST	sp|P49167|RL38_YEAST	4	4	4	sp|P49167|RL38_YEAST 60S ribosomal protein L38 OS=Saccharomyces cerevisiae (strain ATCC 204508 / S288c) GN=RPL38 PE=1 SV=1	1	4	4	4	42.3	42.3	42.3	8.8264	78	78	0	32.875	0.68585	1.0982	28.773	6	0	Leave out requantified	1340000000	714000000	625000000				321	767;1089;1256;1680	True;True;True;True	788;1119;1291;1739	1002;1003;1435;1436;1650;2206	1557;1558;1559;1560;2222;2223;2547;2548;3373	1558;2222;2547;3373
sp|P49626|RL4B_YEAST	sp|P49626|RL4B_YEAST	16	2	2	sp|P49626|RL4B_YEAST 60S ribosomal protein L4-B OS=Saccharomyces cerevisiae (strain ATCC 204508 / S288c) GN=RPL4B PE=1 SV=2	1	16	2	2	51.7	4.4	4.4	39.062	362	362	0	17.904	0.68019	1.0691	12.737	3	0	Median	845000000	502000000	343000000				322	63;393;745;923;924;976;1188;1617;1663;1773;1874;2128;2129;2315;2344;2516	False;False;False;False;False;False;False;False;False;False;False;True;True;False;False;False	65;407;766;946;947;1004;1221;1674;1720;1833;1938;1939;2202;2203;2395;2427;2605	78;79;524;975;976;1213;1214;1215;1288;1289;1559;2127;2182;2183;2323;2324;2325;2465;2466;2797;2798;2799;3044;3088;3089;3090;3322;3323	129;130;131;132;821;822;1517;1518;1883;1884;1885;1886;1887;1888;1990;1991;1992;1993;1994;1995;1996;1997;1998;2401;2402;2403;3257;3258;3337;3338;3339;3538;3539;3540;3753;3754;3755;4264;4265;4266;4267;4268;4630;4703;4704;4705;4706;5040;5041;5042;5043;5044;5045	131;821;1517;1883;1888;1993;2401;3258;3338;3539;3755;4264;4267;4630;4705;5044		151			93
sp|P50109|PSP2_YEAST	sp|P50109|PSP2_YEAST	1	1	1	sp|P50109|PSP2_YEAST Protein PSP2 OS=Saccharomyces cerevisiae (strain ATCC 204508 / S288c) GN=PSP2 PE=1 SV=2	1	1	1	1	3.4	3.4	3.4	65.583	593	593	0	17.443	0.63259	0.99664	NaN	1	0	Median	29065000	17001000	12064000				323	1717	TRUE	1777	2255	3441	3441
sp|P50276|MUP1_YEAST	sp|P50276|MUP1_YEAST	1	1	1	sp|P50276|MUP1_YEAST High-affinity methionine permease OS=Saccharomyces cerevisiae (strain ATCC 204508 / S288c) GN=MUP1 PE=1 SV=1	1	1	1	1	1.9	1.9	1.9	63.221	574	574	0	8.207	0.67692	1.0823	NaN	1	0	Median	6748200	4159100	2589000				324	2114	TRUE	2187	2779	4238	4238
sp|P51401|RL9B_YEAST	sp|P51401|RL9B_YEAST	7	1	1	sp|P51401|RL9B_YEAST 60S ribosomal protein L9-B OS=Saccharomyces cerevisiae (strain ATCC 204508 / S288c) GN=RPL9B PE=1 SV=1	1	7	1	1	39.8	3.7	3.7	21.657	191	191	0	6.0853	NaN	NaN	NaN	0	0	Median	0	0	0				325	269;617;703;823;1516;1942;2407	False;False;True;False;False;False;False	278;634;721;844;1571;2008;2494	353;816;923;1077;1078;1996;2554;3180;3181	565;1270;1443;1689;1690;3062;3063;3889;3890;4833;4834;4835	565;1270;1443;1689;3063;3889;4834		307			191
sp|P51402|RL37B_YEAST	sp|P51402|RL37B_YEAST	2	2	2	sp|P51402|RL37B_YEAST 60S ribosomal protein L37-B OS=Saccharomyces cerevisiae (strain ATCC 204508 / S288c) GN=RPL37B PE=1 SV=2	1	2	2	2	22.7	22.7	22.7	9.8682	88	88	0	12.178	0.95352	1.5226	14.279	2	1	Median	71288000	34823000	36464000				326	1525;2092	True;True	1580;2164	2006;2753	3085;4200	3085;4200
sp|P53032|SUT1_YEAST	sp|P53032|SUT1_YEAST	2	2	2	sp|P53032|SUT1_YEAST Sterol uptake protein 1 OS=Saccharomyces cerevisiae (strain ATCC 204508 / S288c) GN=SUT1 PE=1 SV=1	1	2	2	2	9	9	9	33.191	299	299	0	15.906	0.40852	0.66006	9.5513	2	0	Median	16090000	11553000	4536700				327	1398;1936	True;True	1440;2001	1833;2545	2827;3870;3871	2827;3870
sp|P53064|RTF1_YEAST	sp|P53064|RTF1_YEAST	35	35	35	sp|P53064|RTF1_YEAST RNA polymerase-associated protein RTF1 OS=Saccharomyces cerevisiae (strain ATCC 204508 / S288c) GN=RTF1 PE=1 SV=2	1	35	35	35	52.3	52.3	52.3	65.868	558	558	0	323.31	0.65901	1.0549	7.694	61	3	Leave out requantified	13900000000	7990000000	5960000000				328	100;109;404;416;460;462;483;545;546;565;566;587;677;817;818;1061;1088;1093;1096;1221;1307;1321;1346;1476;1567;1842;2028;2150;2228;2327;2414;2415;2491;2492;2550	True;True;True;True;True;True;True;True;True;True;True;True;True;True;True;True;True;True;True;True;True;True;True;True;True;True;True;True;True;True;True;True;True;True;True	105;115;116;418;430;475;477;498;560;561;580;581;582;583;604;695;838;839;1091;1118;1123;1124;1127;1255;1344;1359;1384;1529;1623;1904;1905;2099;2226;2306;2410;2501;2502;2580;2581;2640	128;142;143;144;145;146;539;540;558;559;615;616;619;646;723;724;725;726;750;751;752;753;781;890;1068;1069;1070;1071;1398;1399;1400;1434;1441;1442;1445;1446;1602;1603;1718;1719;1738;1769;1770;1948;2059;2424;2425;2671;2672;2830;2831;2934;2935;3064;3065;3192;3193;3194;3288;3289;3290;3366;3367	209;210;230;231;232;233;234;235;236;237;846;847;848;849;885;886;887;986;987;991;1034;1035;1150;1151;1152;1153;1154;1155;1187;1188;1189;1190;1191;1192;1224;1389;1390;1658;1659;1660;1661;1662;1663;1664;1665;1666;1667;1668;1669;1670;1671;1672;1673;1674;1675;1676;1677;1678;1679;1680;2159;2160;2161;2162;2163;2220;2221;2230;2231;2235;2236;2237;2238;2474;2475;2646;2647;2648;2687;2688;2689;2690;2691;2692…	210;234;848;887;987;991;1034;1150;1154;1187;1191;1224;1389;1668;1674;2159;2221;2230;2235;2475;2647;2692;2734;2994;3164;3696;4073;4318;4463;4666;4851;4853;4992;4993;5107		308;309;310;311;312;313	19		101;303;350;366;463;546	17
sp|P53090|ARO8_YEAST	sp|P53090|ARO8_YEAST	1	1	1	sp|P53090|ARO8_YEAST Aromatic/aminoadipate aminotransferase 1 OS=Saccharomyces cerevisiae (strain ATCC 204508 / S288c) GN=ARO8 PE=1 SV=1	1	1	1	1	2.8	2.8	2.8	56.177	500	500	0	8.8879	0.42778	0.69827	NaN	1	0	Median	9318900	6263300	3055700				329	1855	TRUE	1919	2442	3718	3718
sp|P53128|MTHR2_YEAST	sp|P53128|MTHR2_YEAST	6	6	6	sp|P53128|MTHR2_YEAST Methylenetetrahydrofolate reductase 2 OS=Saccharomyces cerevisiae (strain ATCC 204508 / S288c) GN=MET13 PE=1 SV=2	1	6	6	6	11.5	11.5	11.5	68.559	600	600	0	44.78	0.49259	0.78976	20.013	6	1	Leave out requantified	281000000	183000000	97779000				330	240;451;1182;1184;1951;2239	True;True;True;True;True;True	248;466;1215;1217;2017;2317	317;605;1551;1554;2567;2946	505;962;2391;2394;3905;4480	505;962;2391;2394;3905;4480
sp|P53163|MNP1_YEAST	sp|P53163|MNP1_YEAST	2	2	2	sp|P53163|MNP1_YEAST 54S ribosomal protein L12, mitochondrial OS=Saccharomyces cerevisiae (strain ATCC 204508 / S288c) GN=MNP1 PE=1 SV=1	1	2	2	2	8.2	8.2	8.2	20.65	194	194	0	11.371	0.80823	1.3277	81.426	2	0	Median	61016000	29763000	31254000				331	1065;2160	True;True	1095;2236	1404;2844	2167;4338	2167;4338
sp|P53212|YG1D_YEAST	sp|P53212|YG1D_YEAST	1	1	1	sp|P53212|YG1D_YEAST Probable transcriptional regulatory protein HAH1 OS=Saccharomyces cerevisiae (strain ATCC 204508 / S288c) GN=YGR021W PE=1 SV=1	1	1	1	1	5.5	5.5	5.5	31.699	290	290	0	5.9991	0.67086	1.0723	NaN	1	0	Median	210000000	120000000	90425000				332	798	TRUE	819	1045	1621	1621
sp|P53221|RL26B_YEAST;sp|P05743|RL26A_YEAST	sp|P53221|RL26B_YEAST;sp|P05743|RL26A_YEAST	11;9	11;9	11;9	sp|P53221|RL26B_YEAST 60S ribosomal protein L26-B OS=Saccharomyces cerevisiae (strain ATCC 204508 / S288c) GN=RPL26B PE=1 SV=2;sp|P05743|RL26A_YEAST 60S ribosomal protein L26-A OS=Saccharomyces cerevisiae (strain ATCC 204508 / S288c) GN=RPL26A PE=1 SV=3	2	11	11	11	49.6	49.6	49.6	14.235	127	127;127	0	84.792	0.62117	0.97852	12.894	15	2	Leave out requantified	3080000000	1910000000	1160000000				333	221;264;465;586;1054;1739;1740;1768;1798;2382;2401	True;True;True;True;True;True;True;True;True;True;True	229;273;480;603;1084;1799;1800;1828;1858;2468;2488	296;345;346;624;779;780;1390;2284;2285;2318;2361;3142;3143;3170;3171	463;464;552;553;554;999;1222;1223;2147;2148;3483;3484;3485;3527;3528;3597;3598;4778;4779;4780;4818;4819;4820	464;554;999;1222;2148;3484;3485;3527;3597;4780;4820
sp|P53252|PIL1_YEAST;sp|Q12230|LSP1_YEAST	sp|P53252|PIL1_YEAST	3;1	3;1	3;1	sp|P53252|PIL1_YEAST Sphingolipid long chain base-responsive protein PIL1 OS=Saccharomyces cerevisiae (strain ATCC 204508 / S288c) GN=PIL1 PE=1 SV=1	2	3	3	3	10.6	10.6	10.6	38.349	339	339;341	0	18.785	0.5208	0.84537	8.2601	3	0	Leave out requantified	105000000	71428000	33351000				334	35;887;1949	True;True;True	36;909;2015	43;1162;2565	66;1802;3903	66;1802;3903		314			72
sp|P53549|PRS10_YEAST	sp|P53549|PRS10_YEAST	3	1	1	sp|P53549|PRS10_YEAST 26S protease subunit RPT4 OS=Saccharomyces cerevisiae (strain ATCC 204508 / S288c) GN=RPT4 PE=1 SV=4	1	3	1	1	5.9	1.6	1.6	49.408	437	437	1	-2	0.47746	0.75865	NaN	1	1	Median	26014000	16522000	9492500	#ERROR!			335	784;919;1800	False;False;True	805;942;1860	1028;1206;2364	1597;1871;3601	1597;1871;3601		315			325
sp|P53622|COPA_YEAST	sp|P53622|COPA_YEAST	7	7	7	sp|P53622|COPA_YEAST Coatomer subunit alpha OS=Saccharomyces cerevisiae (strain ATCC 204508 / S288c) GN=COP1 PE=1 SV=2	1	7	7	7	9.7	9.7	9.7	135.61	1201	1201	0	53.581	0.19858	0.31871	74.048	6	6	Median	128000000	112000000	16794000				336	219;335;1342;1803;1896;2005;2486	True;True;True;True;True;True;True	227;347;1380;1863;1961;2075;2575	294;451;1765;2367;2493;2640;3282	460;711;2728;3605;3794;4027;4983	460;711;2728;3605;3794;4027;4983
sp|P53727|BUD17_YEAST	sp|P53727|BUD17_YEAST	1	1	1	sp|P53727|BUD17_YEAST Putative pyridoxal kinase BUD17 OS=Saccharomyces cerevisiae (strain ATCC 204508 / S288c) GN=BUD17 PE=1 SV=1	1	1	1	1	2.8	2.8	2.8	35.366	317	317	1	-2	0.5932	0.94628	NaN	1	0	Median	90622000	58585000	32037000	#ERROR!			337	1471	TRUE	1524	1943	2983	2983		316			1
sp|P53736|YN8O_YEAST	sp|P53736|YN8O_YEAST	1	1	1	sp|P53736|YN8O_YEAST Uncharacterized protein YNR040W OS=Saccharomyces cerevisiae (strain ATCC 204508 / S288c) GN=YNR040W PE=1 SV=1	1	1	1	1	4.3	4.3	4.3	28.636	256	256	0	6.2961	0.64976	1.0393	NaN	1	0	Median	6916200	3980900	2935300				338	573	TRUE	590	761	1200	1200
sp|P53742|NOG2_YEAST	sp|P53742|NOG2_YEAST	1	1	1	sp|P53742|NOG2_YEAST Nucleolar GTP-binding protein 2 OS=Saccharomyces cerevisiae (strain ATCC 204508 / S288c) GN=NOG2 PE=1 SV=1	1	1	1	1	2.3	2.3	2.3	55.488	486	486	0	8.7894	0.63566	1.0183	NaN	1	0	Median	5064200	3092100	1972100				339	259	TRUE	268	340	545	545
sp|P53849|GIS2_YEAST	sp|P53849|GIS2_YEAST	2	2	2	sp|P53849|GIS2_YEAST Zinc finger protein GIS2 OS=Saccharomyces cerevisiae (strain ATCC 204508 / S288c) GN=GIS2 PE=1 SV=1	1	2	2	2	12.4	12.4	12.4	17.103	153	153	0	14.109	0.86714	1.394	22.547	2	0	Median	41588000	24523000	17065000				340	230;1852	True;True	238;1916	305;2439	479;3714;3715	479;3714
sp|P53933|APP1_YEAST	sp|P53933|APP1_YEAST	1	1	1	sp|P53933|APP1_YEAST Phosphatidate phosphatase APP1 OS=Saccharomyces cerevisiae (strain ATCC 204508 / S288c) GN=APP1 PE=1 SV=1	1	1	1	1	2	2	2	66.134	587	587	0.005102	5.7626	1.022	1.6838	NaN	1	0	Median	19375000	8532100	10843000				341	225	TRUE	233	300	471	471
sp|P53958|BOP3_YEAST	sp|P53958|BOP3_YEAST	1	1	1	sp|P53958|BOP3_YEAST Protein BOP3 OS=Saccharomyces cerevisiae (strain ATCC 204508 / S288c) GN=BOP3 PE=1 SV=1	1	1	1	1	1.8	1.8	1.8	43.748	396	396	1	-2	NaN	NaN	NaN	0	0	Median	0	0	0	#ERROR!			342	1634	TRUE	1691	2147	3288	3288		317			288
sp|P53981|YNB0_YEAST	sp|P53981|YNB0_YEAST	1	1	1	sp|P53981|YNB0_YEAST Uncharacterized phosphatase YNL010W OS=Saccharomyces cerevisiae (strain ATCC 204508 / S288c) GN=YNL010W PE=1 SV=1	1	1	1	1	3.3	3.3	3.3	27.48	241	241	0.002584	5.8026	0.51349	0.84691	NaN	1	0	Median	18488000	13067000	5420700				343	396	TRUE	410	528	829	829
sp|P54115|ALDH6_YEAST	sp|P54115|ALDH6_YEAST	3	3	3	sp|P54115|ALDH6_YEAST Magnesium-activated aldehyde dehydrogenase, cytosolic OS=Saccharomyces cerevisiae (strain ATCC 204508 / S288c) GN=ALD6 PE=1 SV=4	1	3	3	3	7.6	7.6	7.6	54.414	500	500	0	20.6	0.34593	0.55797	18.577	3	1	Median	57901000	40757000	17143000				344	2174;2250;2333	True;True;True	2250;2328;2416	2865;2963;3073	4367;4509;4677	4367;4509;4677
sp|P54785|MOT3_YEAST	sp|P54785|MOT3_YEAST	6	6	6	sp|P54785|MOT3_YEAST Transcriptional activator/repressor MOT3 OS=Saccharomyces cerevisiae (strain ATCC 204508 / S288c) GN=MOT3 PE=1 SV=1	1	6	6	6	18.2	18.2	18.2	54.381	490	490	0	59.401	0.63428	1.0092	6.3994	6	1	Leave out requantified	531000000	321000000	210000000				345	318;1453;1647;2165;2385;2546	True;True;True;True;True;True	328;1503;1704;2241;2471;2636	425;1917;2160;2853;3146;3362	669;670;2948;2949;3305;4351;4352;4783;5101	670;2948;3305;4351;4783;5101		318;319			1;393
sp|P60010|ACT_YEAST	sp|P60010|ACT_YEAST	13	13	13	sp|P60010|ACT_YEAST Actin OS=Saccharomyces cerevisiae (strain ATCC 204508 / S288c) GN=ACT1 PE=1 SV=1	1	13	13	13	35.5	35.5	35.5	41.689	375	375	0	96.84	0.51231	0.8208	12.275	13	2	Leave out requantified	1470000000	946000000	522000000				346	60;198;199;311;348;349;797;834;915;1677;2055;2276;2580	True;True;True;True;True;True;True;True;True;True;True;True;True	62;206;207;321;360;361;818;855;938;1735;2127;2355;2673	74;75;266;267;411;464;465;1044;1095;1201;2202;2706;2996;3405	124;125;414;415;649;650;729;730;731;1620;1712;1713;1863;3365;4133;4134;4554;4555;5164;5165	125;414;415;649;729;731;1620;1712;1863;3365;4133;4555;5164		320;321;322;323;324			44;47;82;110;190
sp|P61830|H3_YEAST	sp|P61830|H3_YEAST	1	1	1	sp|P61830|H3_YEAST Histone H3 OS=Saccharomyces cerevisiae (strain ATCC 204508 / S288c) GN=HHT1 PE=1 SV=2	1	1	1	1	6.6	6.6	6.6	15.356	136	136	0	6.0395	0.59804	0.97462	NaN	1	0	Median	63173000	36624000	26549000				347	2553	TRUE	2643	3371	5114	5114
sp|P89105|CTR9_YEAST	sp|P89105|CTR9_YEAST	36	36	36	sp|P89105|CTR9_YEAST RNA polymerase-associated protein CTR9 OS=Saccharomyces cerevisiae (strain ATCC 204508 / S288c) GN=CTR9 PE=1 SV=3	1	36	36	36	32.4	32.4	32.4	124.71	1077	1077	0	323.31	0.72628	1.1497	10.169	45	8	Leave out requantified	6580000000	3770000000	2810000000				348	85;93;112;113;116;128;168;328;330;386;387;420;427;434;484;522;531;747;875;892;1095;1098;1225;1243;1318;1467;1506;1630;1861;1866;1929;1930;2049;2076;2220;2314	True;True;True;True;True;True;True;True;True;True;True;True;True;True;True;True;True;True;True;True;True;True;True;True;True;True;True;True;True;True;True;True;True;True;True;True	90;98;119;120;123;135;176;340;342;400;401;435;442;449;499;537;546;768;896;897;914;1126;1129;1259;1278;1356;1519;1560;1687;1925;1930;1994;1995;2121;2148;2297;2393;2394	112;121;149;150;151;155;170;171;226;441;444;517;518;565;574;584;647;648;697;707;978;1146;1147;1170;1171;1444;1448;1607;1608;1632;1633;1735;1938;1983;2142;2143;2448;2454;2537;2538;2699;2732;2733;2923;3041;3042;3043	182;199;200;241;242;243;244;245;251;275;276;277;361;696;697;701;810;811;897;898;910;911;925;926;1036;1037;1038;1102;1103;1104;1105;1106;1107;1122;1123;1520;1776;1777;1778;1779;1813;1814;1815;2233;2234;2240;2480;2481;2482;2514;2515;2516;2517;2676;2677;2678;2679;2680;2681;2682;2683;2976;2977;3041;3282;3283;3725;3736;3858;3859;3860;3861;4124;4167;4168;4169;4444;4445;4626;4627;4628;4629	182;199;241;244;251;276;361;696;701;810;811;897;910;926;1038;1105;1123;1520;1777;1814;2233;2240;2481;2515;2679;2977;3041;3283;3725;3736;3858;3860;4124;4169;4444;4626		325;326;327;328;329;330;331;332;333;334;335;336	20;21		13;81;200;328;331;360;492;594;598;744;871;963	974;977
sp|P89886|TMA20_YEAST	sp|P89886|TMA20_YEAST	1	1	1	sp|P89886|TMA20_YEAST Translation machinery-associated protein 20 OS=Saccharomyces cerevisiae (strain ATCC 204508 / S288c) GN=TMA20 PE=1 SV=1	1	1	1	1	3.9	3.9	3.9	20.277	181	181	0	6.0072	0.67904	1.0959	0.9433	2	0	Median	148000000	87235000	60976000				349	1981	TRUE	2049	2607;2608	3975;3976	3976
sp|Q00055|GPD1_YEAST	sp|Q00055|GPD1_YEAST	2	2	2	sp|Q00055|GPD1_YEAST Glycerol-3-phosphate dehydrogenase [NAD(+)] 1 OS=Saccharomyces cerevisiae (strain ATCC 204508 / S288c) GN=GPD1 PE=1 SV=4	1	2	2	2	7.7	7.7	7.7	42.868	391	391	0	11.93	0.48197	0.77744	3.2317	2	1	Median	37941000	26014000	11927000				350	2336;2563	True;True	2419;2653	3077;3382	4684;5128	4684;5128
sp|Q00684|CDC14_YEAST	sp|Q00684|CDC14_YEAST	1	1	1	sp|Q00684|CDC14_YEAST Tyrosine-protein phosphatase CDC14 OS=Saccharomyces cerevisiae (strain ATCC 204508 / S288c) GN=CDC14 PE=1 SV=2	1	1	1	1	1.3	1.3	1.3	61.906	551	551	1	-2	NaN	NaN	NaN	0	0	Median	0	0	0	#ERROR!			351	997	TRUE	1025	1315	2036;2037;2038;2039	2036			22			548
sp|Q00955|ACAC_YEAST	sp|Q00955|ACAC_YEAST	5	5	5	sp|Q00955|ACAC_YEAST Acetyl-CoA carboxylase OS=Saccharomyces cerevisiae (strain ATCC 204508 / S288c) GN=ACC1 PE=1 SV=2	1	5	5	5	2.6	2.6	2.6	250.35	2233	2233	0	33.931	0.56731	0.92379	50.182	5	4	Median	120000000	51484000	68114000				352	94;906;1212;1448;1571	True;True;True;True;True	99;928;1245;1497;1627	122;1186;1590;1910;2063	201;1840;2451;2939;3172	201;1840;2451;2939;3172		337			2219
sp|Q01448|HPC2_YEAST	sp|Q01448|HPC2_YEAST	1	1	1	sp|Q01448|HPC2_YEAST Histone promoter control protein 2 OS=Saccharomyces cerevisiae (strain ATCC 204508 / S288c) GN=HPC2 PE=1 SV=2	1	1	1	1	1.4	1.4	1.4	67.775	625	625	1	-2	NaN	NaN	NaN	0	0	Median	0	0	0	#ERROR!			353	1062	TRUE	1092	1401	2164	2164	5		23;39	418		421;424
sp|Q01560|NOP3_YEAST	sp|Q01560|NOP3_YEAST	15	15	15	sp|Q01560|NOP3_YEAST Nucleolar protein 3 OS=Saccharomyces cerevisiae (strain ATCC 204508 / S288c) GN=NPL3 PE=1 SV=1	1	15	15	15	31.4	31.4	31.4	45.407	414	414	0	124.97	0.73323	1.1512	8.9469	25	3	Leave out requantified	24800000000	14200000000	10600000000				354	84;265;266;508;698;712;770;771;772;1308;1504;1556;1633;1674;1864	True;True;True;True;True;True;True;True;True;True;True;True;True;True;True	89;274;275;523;716;730;791;792;793;1345;1558;1611;1690;1732;1928	110;111;347;348;349;679;680;916;917;933;1007;1008;1009;1010;1011;1720;1721;1980;1981;2041;2146;2197;2198;2451;2452	178;179;180;181;555;556;557;558;559;560;1076;1077;1078;1079;1433;1434;1435;1455;1565;1566;1567;1568;1569;1570;1571;1572;1573;2649;2650;2651;2652;2653;2654;3036;3037;3038;3039;3130;3131;3132;3133;3287;3358;3359;3360;3361;3729;3730;3731;3732;3733	181;556;560;1076;1433;1455;1567;1570;1571;2649;3037;3130;3287;3360;3733		338			151
sp|Q01590|SED5_YEAST	sp|Q01590|SED5_YEAST	11	11	11	sp|Q01590|SED5_YEAST Integral membrane protein SED5 OS=Saccharomyces cerevisiae (strain ATCC 204508 / S288c) GN=SED5 PE=1 SV=1	1	11	11	11	48.8	48.8	48.8	38.807	340	340	0	152.63	0.088357	0.14112	177.76	9	9	Median	1220000000	1160000000	63736000				355	170;529;860;1033;1113;1382;1537;1625;1723;1734;2215	True;True;True;True;True;True;True;True;True;True;True	178;544;881;1063;1145;1422;1423;1592;1682;1783;1794;2292	229;230;705;1128;1363;1364;1468;1814;1815;2020;2137;2264;2277;2278;2917	366;367;1120;1753;2112;2113;2266;2799;2800;3105;3275;3454;3455;3473;3474;3475;4435	367;1120;1753;2112;2266;2799;3105;3275;3455;3474;4435		339;340			169;209
sp|Q01662|MAP1_YEAST	sp|Q01662|MAP1_YEAST	2	2	2	sp|Q01662|MAP1_YEAST Methionine aminopeptidase 1 OS=Saccharomyces cerevisiae (strain ATCC 204508 / S288c) GN=MAP1 PE=1 SV=2	1	2	2	2	7.2	7.2	7.2	43.373	387	387	0	30.57	0.68495	1.1088	5.6531	2	1	Median	48654000	27824000	20829000				356	385;2023	True;True	399;2094	516;2665	809;4063;4064	809;4063
sp|Q01855|RS15_YEAST	sp|Q01855|RS15_YEAST	5	5	5	sp|Q01855|RS15_YEAST 40S ribosomal protein S15 OS=Saccharomyces cerevisiae (strain ATCC 204508 / S288c) GN=RPS15 PE=1 SV=1	1	5	5	5	43	43	43	16.002	142	142	0	55.716	0.58708	0.93002	6.2838	17	2	Leave out requantified	17700000000	11000000000	6720000000				357	734;1141;1268;1565;1976	True;True;True;True;True	754;755;1173;1303;1304;1620;1621;2044	959;960;961;962;963;1501;1502;1665;1666;1667;2052;2053;2054;2055;2056;2599;2600	1494;1495;1496;1497;1498;1499;1500;2315;2316;2317;2318;2567;2568;2569;2570;2571;2572;2573;2574;3149;3150;3151;3152;3153;3154;3155;3156;3157;3158;3159;3961;3962;3963	1499;2318;2571;3151;3963		341;342;343;344;345			28;49;57;83;89
sp|Q01939|PRS8_YEAST	sp|Q01939|PRS8_YEAST	7	7	6	sp|Q01939|PRS8_YEAST 26S protease regulatory subunit 8 homolog OS=Saccharomyces cerevisiae (strain ATCC 204508 / S288c) GN=RPT6 PE=1 SV=4	1	7	7	6	22.7	22.7	21	45.271	405	405	0	61.011	0.45258	0.73754	17.098	6	3	Leave out requantified	312000000	160000000	151000000				358	919;1281;2063;2184;2419;2437;2545	True;True;True;True;True;True;True	942;1317;2135;2260;2506;2524;2635	1206;1684;2716;2876;3198;3221;3361	1871;2598;2599;4146;4383;4860;4891;5100	1871;2598;4146;4383;4860;4891;5100		315;346;347			149;272;292
sp|Q02326|RL6A_YEAST	sp|Q02326|RL6A_YEAST	8	3	3	sp|Q02326|RL6A_YEAST 60S ribosomal protein L6-A OS=Saccharomyces cerevisiae (strain ATCC 204508 / S288c) GN=RPL6A PE=1 SV=2	1	8	3	3	48.9	21	21	19.961	176	176	0	33.961	0.55327	0.88375	5.6487	5	1	Leave out requantified	847000000	475000000	372000000				359	174;388;636;827;1764;2403;2508;2612	False;True;False;True;False;False;True;False	182;402;653;848;1824;2490;2597;2707	236;237;519;840;841;1084;1085;2314;3175;3311;3312;3453;3454	376;377;378;379;812;813;814;1303;1304;1305;1696;1697;1698;3523;4827;5023;5024;5025;5236;5237;5238;5239	377;813;1303;1698;3523;4827;5023;5239
sp|Q02486|ABF2_YEAST	sp|Q02486|ABF2_YEAST	4	4	4	sp|Q02486|ABF2_YEAST ARS-binding factor 2, mitochondrial OS=Saccharomyces cerevisiae (strain ATCC 204508 / S288c) GN=ABF2 PE=1 SV=1	1	4	4	4	21.3	21.3	21.3	21.561	183	183	0	28.406	0.70871	1.1381	26.326	4	0	Leave out requantified	175000000	90676000	84462000				360	507;1099;1987;2504	True;True;True;True	522;1130;2055;2593	678;1449;2615;3306	1075;2241;3986;5017	1075;2241;3986;5017
sp|Q12672|RL21B_YEAST;sp|Q02753|RL21A_YEAST	sp|Q12672|RL21B_YEAST;sp|Q02753|RL21A_YEAST	6;6	6;6	6;6	sp|Q12672|RL21B_YEAST 60S ribosomal protein L21-B OS=Saccharomyces cerevisiae (strain ATCC 204508 / S288c) GN=RPL21B PE=1 SV=1;sp|Q02753|RL21A_YEAST 60S ribosomal protein L21-A OS=Saccharomyces cerevisiae (strain ATCC 204508 / S288c) GN=RPL21A PE=1 SV=1	2	6	6	6	31.2	31.2	31.2	18.274	160	160;160	0	43.29	0.63622	1.0073	4.8527	10	0	Leave out requantified	5570000000	3370000000	2190000000				361	159;245;1788;2018;2136;2332	True;True;True;True;True;True	167;253;1848;2089;2211;2415	211;212;322;2345;2658;2659;2809;2810;3071;3072	340;341;342;512;513;3571;3572;3573;3574;3575;3576;3577;4051;4052;4053;4054;4282;4283;4284;4674;4675;4676	341;513;3573;4053;4283;4676
sp|Q02796|LGE1_YEAST	sp|Q02796|LGE1_YEAST	2	2	2	sp|Q02796|LGE1_YEAST Transcriptional regulatory protein LGE1 OS=Saccharomyces cerevisiae (strain ATCC 204508 / S288c) GN=LGE1 PE=1 SV=1	1	2	2	2	8.1	8.1	8.1	37.309	332	332	0	25.309	0.68154	1.1012	9.0576	2	0	Median	67508000	39349000	28159000				362	336;527	True;True	348;542	452;702	712;713;1116;1117	713;1116
sp|Q02892|NOG1_YEAST	sp|Q02892|NOG1_YEAST	3	3	3	sp|Q02892|NOG1_YEAST Nucleolar GTP-binding protein 1 OS=Saccharomyces cerevisiae (strain ATCC 204508 / S288c) GN=NOG1 PE=1 SV=1	1	3	3	3	4.5	4.5	4.5	74.409	647	647	0	16.579	0.60873	1.2245	13.935	3	1	Plateau	117000000	74493000	42722000				363	607;998;2172	True;True;True	624;1026;2248	804;1316;2863	1257;2040;4364	1257;2040;4364
sp|Q02895|AAD16_YEAST	sp|Q02895|AAD16_YEAST	3	3	3	sp|Q02895|AAD16_YEAST Putative aryl-alcohol dehydrogenase AAD16 OS=Saccharomyces cerevisiae (strain ATCC 204508 / S288c) GN=AAD16 PE=1 SV=1	1	3	3	3	9.9	9.9	9.9	39.682	342	342	0	30.477	0.59118	0.95419	7.6844	3	0	Leave out requantified	202000000	124000000	78251000				364	123;480;2107	True;True;True	130;495;2180	164;643;2772	264;1030;4227	264;1030;4227
sp|Q02948|BECN1_YEAST	sp|Q02948|BECN1_YEAST	1	1	1	sp|Q02948|BECN1_YEAST Vacuolar protein sorting-associated protein 30 OS=Saccharomyces cerevisiae (strain ATCC 204508 / S288c) GN=VPS30 PE=1 SV=1	1	1	1	1	1.3	1.3	1.3	63.26	557	557	0.005115	5.7703	0.45786	0.73356	NaN	1	0	Median	162000000	110000000	51405000				365	1267	TRUE	1302	1664	2565;2566	2565
sp|Q02979|GDE1_YEAST	sp|Q02979|GDE1_YEAST	16	16	16	sp|Q02979|GDE1_YEAST Glycerophosphodiester phosphodiesterase GDE1 OS=Saccharomyces cerevisiae (strain ATCC 204508 / S288c) GN=GDE1 PE=1 SV=1	1	16	16	16	17	17	17	138.01	1223	1223	0	164.84	0.74313	1.1894	10.111	16	2	Leave out requantified	995000000	577000000	418000000				366	176;343;493;954;965;1320;1572;1725;2019;2031;2040;2229;2339;2356;2470;2606	True;True;True;True;True;True;True;True;True;True;True;True;True;True;True;True	184;355;508;979;992;1358;1628;1785;2090;2102;2111;2307;2422;2441;2559;2701	239;459;659;1251;1270;1737;2064;2266;2267;2660;2676;2686;2936;3081;3108;3263;3444	381;722;723;1050;1051;1934;1963;2686;3173;3174;3457;3458;3459;4055;4056;4088;4089;4105;4106;4464;4465;4690;4691;4692;4693;4730;4950;4951;5223;5224	381;723;1051;1934;1963;2686;3174;3458;4056;4088;4106;4464;4690;4730;4951;5223		348;349;350;351;352			209;212;302;801;1134
sp|Q03102|YMN1_YEAST	sp|Q03102|YMN1_YEAST	10	10	10	sp|Q03102|YMN1_YEAST Uncharacterized membrane protein YML131W OS=Saccharomyces cerevisiae (strain ATCC 204508 / S288c) GN=YML131W PE=1 SV=1	1	10	10	10	26.6	26.6	26.6	39.976	365	365	0	87.967	0.721	1.1417	6.9245	11	1	Leave out requantified	2170000000	1250000000	919000000				367	279;492;673;724;785;790;796;1819;1820;2347	True;True;True;True;True;True;True;True;True;True	288;507;691;742;806;811;817;1880;1881;2430	371;658;886;947;1029;1036;1043;2391;2392;2393;3094	589;590;1049;1383;1384;1476;1598;1599;1600;1609;1618;1619;3642;3643;3644;3645;4710;4711	590;1049;1383;1476;1598;1609;1619;3642;3644;4711		353			67
sp|Q03497|STE20_YEAST	sp|Q03497|STE20_YEAST	9	9	9	sp|Q03497|STE20_YEAST Serine/threonine-protein kinase STE20 OS=Saccharomyces cerevisiae (strain ATCC 204508 / S288c) GN=STE20 PE=1 SV=1	1	9	9	9	15.8	15.8	15.8	102.36	939	939	0	117.71	0.72563	1.1719	21.117	11	1	Leave out requantified	492000000	285000000	207000000				368	147;177;185;357;614;775;835;2231;2270	True;True;True;True;True;True;True;True;True	155;185;193;370;631;796;856;2309;2349	196;240;251;475;812;813;1014;1015;1096;2938;2987	313;382;396;742;743;1266;1267;1577;1578;1714;4468;4469;4541;4542	313;382;396;742;1267;1577;1714;4469;4541		354;355			215;897
sp|Q03529|SCS7_YEAST	sp|Q03529|SCS7_YEAST	1	1	1	sp|Q03529|SCS7_YEAST Ceramide very long chain fatty acid hydroxylase SCS7 OS=Saccharomyces cerevisiae (strain ATCC 204508 / S288c) GN=SCS7 PE=1 SV=1	1	1	1	1	3.9	3.9	3.9	44.881	384	384	0	6.5396	0.53866	0.85856	NaN	1	0	Median	5695000	3705400	1989600				369	752	TRUE	773	984	1529;1530	1529
sp|Q03532|HAS1_YEAST	sp|Q03532|HAS1_YEAST	2	2	2	sp|Q03532|HAS1_YEAST ATP-dependent RNA helicase HAS1 OS=Saccharomyces cerevisiae (strain ATCC 204508 / S288c) GN=HAS1 PE=1 SV=1	1	2	2	2	3.8	3.8	3.8	56.717	505	505	0	11.858	0.10007	0.16161	181.99	2	1	Median	83677000	70902000	12775000				370	359;2420	True;True	372;2507	477;3199	745;4861	745;4861
sp|Q03558|OYE2_YEAST;sp|P41816|OYE3_YEAST	sp|Q03558|OYE2_YEAST	19;2	19;2	19;2	sp|Q03558|OYE2_YEAST NADPH dehydrogenase 2 OS=Saccharomyces cerevisiae (strain ATCC 204508 / S288c) GN=OYE2 PE=1 SV=3	2	19	19	19	46.2	46.2	46.2	45.01	400	400;400	0	230.84	0.46648	0.74385	7.2122	24	3	Leave out requantified	5160000000	3500000000	1670000000				371	71;141;142;162;201;273;417;579;604;902;1046;1047;1150;1463;2094;2164;2457;2522;2523	True;True;True;True;True;True;True;True;True;True;True;True;True;True;True;True;True;True;True	75;149;150;170;209;282;431;596;621;924;1076;1077;1182;1514;2166;2240;2545;2611;2612;2613	93;189;190;218;270;363;364;560;769;770;801;1182;1378;1379;1380;1381;1511;1930;2755;2851;2852;3246;3331;3332;3333;3334	152;153;303;304;351;419;420;421;422;578;579;580;581;888;889;890;1210;1211;1253;1254;1834;1835;2130;2131;2132;2133;2134;2135;2330;2964;2965;4202;4203;4349;4350;4926;5057;5058;5059;5060;5061	152;303;304;351;419;581;888;1211;1254;1834;2131;2134;2330;2965;4202;4350;4926;5058;5059		356;357			144;378
sp|Q03691|ROT1_YEAST	sp|Q03691|ROT1_YEAST	1	1	1	sp|Q03691|ROT1_YEAST Protein ROT1 OS=Saccharomyces cerevisiae (strain ATCC 204508 / S288c) GN=ROT1 PE=1 SV=1	1	1	1	1	6.6	6.6	6.6	28.908	256	256	0	19.738	0.81925	1.3272	NaN	1	0	Median	73517000	41760000	31758000				372	1704	TRUE	1764	2238	3417;3418	3418
sp|Q03818|ATG16_YEAST	sp|Q03818|ATG16_YEAST	1	1	1	sp|Q03818|ATG16_YEAST Autophagy protein 16 OS=Saccharomyces cerevisiae (strain ATCC 204508 / S288c) GN=ATG16 PE=1 SV=1	1	1	1	1	5.3	5.3	5.3	17.222	150	150	0	5.9587	0.60278	0.98244	NaN	1	1	Median	56563000	35142000	21421000				373	735	TRUE	756	964	1501	1501
sp|Q03940|RUVB1_YEAST	sp|Q03940|RUVB1_YEAST	1	1	1	sp|Q03940|RUVB1_YEAST RuvB-like protein 1 OS=Saccharomyces cerevisiae (strain ATCC 204508 / S288c) GN=RVB1 PE=1 SV=1	1	1	1	1	3.2	3.2	3.2	50.452	463	463	0	11.838	0.38289	0.62744	NaN	1	0	Median	14751000	11265000	3485300				374	506	TRUE	521	677	1074	1074
sp|Q03973|HMO1_YEAST	sp|Q03973|HMO1_YEAST	2	2	2	sp|Q03973|HMO1_YEAST High mobility group protein 1 OS=Saccharomyces cerevisiae (strain ATCC 204508 / S288c) GN=HMO1 PE=1 SV=1	1	2	2	2	12.2	12.2	12.2	27.544	246	246	0	13.506	0.61553	0.99917	11.831	2	0	Median	52567000	33685000	18883000				375	68;332	True;True	70;344	86;446	140;704;705	140;705
sp|Q04013|YHM2_YEAST	sp|Q04013|YHM2_YEAST	7	7	7	sp|Q04013|YHM2_YEAST Citrate/oxoglutarate carrier protein OS=Saccharomyces cerevisiae (strain ATCC 204508 / S288c) GN=YHM2 PE=1 SV=1	1	7	7	7	22.6	22.6	22.6	34.184	314	314	0	58.317	0.59794	0.96753	20.726	7	2	Leave out requantified	367000000	226000000	141000000				376	786;1389;1468;1645;1714;1814;2549	True;True;True;True;True;True;True	807;1430;1520;1702;1774;1875;2639	1030;1822;1939;2158;2248;2384;3365	1601;2809;2978;3301;3302;3431;3631;3632;5105	1601;2809;2978;3302;3431;3632;5105		358;359			183;305
sp|Q04062|RPN9_YEAST	sp|Q04062|RPN9_YEAST	2	2	2	sp|Q04062|RPN9_YEAST 26S proteasome regulatory subunit RPN9 OS=Saccharomyces cerevisiae (strain ATCC 204508 / S288c) GN=RPN9 PE=1 SV=1	1	2	2	2	4.3	4.3	4.3	45.782	393	393	0	11.82	0.48819	0.78495	38.185	2	1	Median	73017000	45260000	27757000				377	305;927	True;True	315;950	403;1218	636;1893	636;1893
sp|Q04116|YHP1_YEAST	sp|Q04116|YHP1_YEAST	1	1	1	sp|Q04116|YHP1_YEAST Homeobox protein YHP1 OS=Saccharomyces cerevisiae (strain ATCC 204508 / S288c) GN=YHP1 PE=1 SV=1	1	1	1	1	4.2	4.2	4.2	39.598	353	353	1	-2	NaN	NaN	NaN	0	0	Median	0	0	0	#ERROR!			378	1637	TRUE	1694	2150	3292	3292			24;25;26			98;99;101
sp|Q04264|PDS5_YEAST	sp|Q04264|PDS5_YEAST	42	42	42	sp|Q04264|PDS5_YEAST Sister chromatid cohesion protein PDS5 OS=Saccharomyces cerevisiae (strain ATCC 204508 / S288c) GN=PDS5 PE=1 SV=1	1	42	42	42	37.2	37.2	37.2	147.04	1277	1277	0	323.31	0.62168	0.98333	10.526	46	7	Leave out requantified	5950000000	3440000000	2500000000				379	39;53;81;119;247;299;422;440;471;487;556;564;621;634;676;844;937;945;953;994;1002;1234;1250;1251;1263;1288;1330;1387;1388;1415;1416;1494;1795;1884;2112;2266;2408;2426;2574;2575;2594;2616	True;True;True;True;True;True;True;True;True;True;True;True;True;True;True;True;True;True;True;True;True;True;True;True;True;True;True;True;True;True;True;True;True;True;True;True;True;True;True;True;True;True	40;55;86;126;255;308;437;455;486;502;571;579;638;651;694;865;961;969;978;1022;1031;1268;1285;1286;1298;1324;1368;1428;1429;1457;1458;1547;1855;1949;2185;2344;2495;2513;2666;2667;2688;2712	47;66;107;158;324;395;568;591;633;651;739;749;820;821;836;837;889;1108;1229;1239;1250;1311;1323;1324;1619;1642;1643;1660;1694;1749;1820;1821;1856;1857;1858;1968;2354;2480;2777;2981;2982;3182;3207;3397;3398;3399;3424;3425;3426;3461	73;74;75;76;77;78;109;110;173;174;255;516;623;624;903;904;935;936;1011;1041;1170;1171;1185;1186;1274;1275;1295;1296;1297;1298;1387;1388;1726;1727;1905;1917;1918;1931;1932;1933;2031;2032;2053;2054;2055;2499;2531;2532;2533;2534;2559;2612;2709;2806;2807;2808;2859;2860;2861;2862;2863;3021;3587;3773;4235;4534;4535;4836;4872;4873;5151;5152;5153;5154;5155;5156;5193;5194;5195;5253	76;109;174;255;516;623;904;936;1011;1041;1170;1185;1275;1295;1387;1726;1905;1917;1932;2031;2055;2499;2531;2534;2559;2612;2709;2807;2808;2860;2862;3021;3587;3773;4235;4534;4836;4873;5151;5153;5193;5253		360;361;362;363;364;365	27;40		380;422;535;544;625;1276	1162;1167
sp|Q04372|TAP42_YEAST	sp|Q04372|TAP42_YEAST	8	8	8	sp|Q04372|TAP42_YEAST Type 2A phosphatase-associated protein 42 OS=Saccharomyces cerevisiae (strain ATCC 204508 / S288c) GN=TAP42 PE=1 SV=1	1	8	8	8	28.7	28.7	28.7	42.567	366	366	0	95.809	0.60929	0.99505	3.9334	10	3	Leave out requantified	380000000	234000000	146000000				380	179;1154;1266;1671;1672;1789;2003;2390	True;True;True;True;True;True;True;True	187;1186;1301;1729;1730;1849;2073;2476	242;243;1515;1663;2194;2195;2346;2347;2348;2638;3152	384;385;386;2335;2336;2563;2564;3355;3356;3578;3579;3580;4024;4025;4793	384;2335;2564;3355;3356;3578;4025;4793		366			335
sp|Q04373|PUF6_YEAST	sp|Q04373|PUF6_YEAST	1	1	1	sp|Q04373|PUF6_YEAST Pumilio homology domain family member 6 OS=Saccharomyces cerevisiae (strain ATCC 204508 / S288c) GN=PUF6 PE=1 SV=1	1	1	1	1	1.8	1.8	1.8	75.105	656	656	0	6.305	0.52034	0.84668	NaN	1	0	Median	13293000	9148300	4145000				381	1553	TRUE	1608	2038	3126	3126
sp|Q04377|LCD1_YEAST	sp|Q04377|LCD1_YEAST	2	2	2	sp|Q04377|LCD1_YEAST DNA damage checkpoint protein LCD1 OS=Saccharomyces cerevisiae (strain ATCC 204508 / S288c) GN=LCD1 PE=1 SV=1	1	2	2	2	2.7	2.7	2.7	86.424	747	747	0	12.375	0.72813	1.1762	NaN	1	0	Median	36794000	19490000	17304000				382	158;1502	True;True	166;1556	210;1978	339;3034	339;3034		367			77
sp|Q04781|LTN1_YEAST	sp|Q04781|LTN1_YEAST	8	8	8	sp|Q04781|LTN1_YEAST E3 ubiquitin-protein ligase listerin OS=Saccharomyces cerevisiae (strain ATCC 204508 / S288c) GN=RKR1 PE=1 SV=1	1	8	8	8	5.8	5.8	5.8	180.18	1562	1562	0	53.161	0.66213	1.0901	9.8141	8	0	Leave out requantified	103000000	59569000	43861000				383	312;581;671;1287;1509;1911;1965;2002	True;True;True;True;True;True;True;True	322;598;689;1323;1563;1976;2032;2072	412;773;884;1693;1986;2517;2586;2637	651;1216;1381;2611;3047;3829;3942;4023	651;1216;1381;2611;3047;3829;3942;4023		368			1068
sp|Q04947|RTN1_YEAST	sp|Q04947|RTN1_YEAST	5	5	5	sp|Q04947|RTN1_YEAST Reticulon-like protein 1 OS=Saccharomyces cerevisiae (strain ATCC 204508 / S288c) GN=RTN1 PE=1 SV=1	1	5	5	5	21.7	21.7	21.7	32.916	295	295	0	55	0.57326	0.91666	15.164	6	0	Leave out requantified	201000000	122000000	79670000				384	1139;1210;1227;1815;2080	True;True;True;True;True	1171;1243;1261;1876;2152	1499;1587;1610;2385;2386;2737	2312;2445;2446;2485;3633;3634;3635;4175;4176	2312;2446;2485;3633;4176
sp|Q05022|RRP5_YEAST	sp|Q05022|RRP5_YEAST	2	2	2	sp|Q05022|RRP5_YEAST rRNA biogenesis protein RRP5 OS=Saccharomyces cerevisiae (strain ATCC 204508 / S288c) GN=RRP5 PE=1 SV=1	1	2	2	2	1.3	1.3	1.3	193.13	1729	1729	0	10.993	0.66089	1.0675	17.77	2	0	Median	8727200	5693900	3033300				385	1278;2483	True;True	1314;2572	1681;3278	2594;2595;4977	2594;4977
sp|Q06103|RPN7_YEAST	sp|Q06103|RPN7_YEAST	2	2	2	sp|Q06103|RPN7_YEAST 26S proteasome regulatory subunit RPN7 OS=Saccharomyces cerevisiae (strain ATCC 204508 / S288c) GN=RPN7 PE=1 SV=3	1	2	2	2	4.9	4.9	4.9	48.958	429	429	0	15.779	0.59399	0.94743	NaN	1	0	Median	32667000	20519000	12149000				386	51;1978	True;True	53;2046	64;2603	106;3971	106;3971
sp|Q06409|YL422_YEAST	sp|Q06409|YL422_YEAST	1	1	1	sp|Q06409|YL422_YEAST DOCK-like protein YLR422W OS=Saccharomyces cerevisiae (strain ATCC 204508 / S288c) GN=YLR422W PE=1 SV=1	1	1	1	1	0.4	0.4	0.4	221.56	1932	1932	1	-2	NaN	NaN	NaN	0	0	Median	0	0	0	#ERROR!			387	1643	TRUE	1700	2156	3299	3299			28			1800
sp|Q06485|ATG33_YEAST	sp|Q06485|ATG33_YEAST	1	1	1	sp|Q06485|ATG33_YEAST Autophagy-related protein 33 OS=Saccharomyces cerevisiae (strain ATCC 204508 / S288c) GN=ATG33 PE=1 SV=1	1	1	1	1	6.6	6.6	6.6	20.4	197	197	1	-2	NaN	NaN	NaN	0	0	Median	0	0	0	#ERROR!			388	2442	TRUE	2529	3226	4898	4898			29;30;31			109;112;113
sp|Q06630|MHR1_YEAST	sp|Q06630|MHR1_YEAST	6	6	6	sp|Q06630|MHR1_YEAST Mitochondrial homologous recombination protein 1 OS=Saccharomyces cerevisiae (strain ATCC 204508 / S288c) GN=MHR1 PE=1 SV=1	1	6	6	6	27.9	27.9	27.9	26.894	226	226	0	52.147	0.66855	1.0648	14.456	5	0	Leave out requantified	529000000	326000000	203000000				389	241;415;926;1203;1744;2325	True;True;True;True;True;True	249;429;949;1236;1804;2408	318;557;1217;1577;2289;3061	506;884;1891;1892;2430;3489;4657;4658	506;884;1891;2430;3489;4658		369			74
sp|Q06668|OMS1_YEAST	sp|Q06668|OMS1_YEAST	4	4	4	sp|Q06668|OMS1_YEAST Methyltransferase OMS1, mitochondrial OS=Saccharomyces cerevisiae (strain ATCC 204508 / S288c) GN=OMS1 PE=1 SV=1	1	4	4	4	8.1	8.1	8.1	55.588	471	471	0	25.38	0.49271	0.81496	19.972	3	0	Leave out requantified	84128000	54193000	29935000				390	125;721;1301;2432	True;True;True;True	132;739;1337;2519	166;944;1708;3215	267;1473;2630;4884	267;1473;2630;4884
sp|Q06697|CDC73_YEAST	sp|Q06697|CDC73_YEAST	14	14	14	sp|Q06697|CDC73_YEAST Cell division control protein 73 OS=Saccharomyces cerevisiae (strain ATCC 204508 / S288c) GN=CDC73 PE=1 SV=1	1	14	14	14	43.5	43.5	43.5	44.456	393	393	0	187.73	0.51393	0.82574	11.123	19	2	Leave out requantified	3560000000	2310000000	1250000000				391	339;611;684;700;961;1058;1557;1568;1635;1681;1710;2038;2095;2153	True;True;True;True;True;True;True;True;True;True;True;True;True;True	351;628;702;718;986;1088;1612;1624;1692;1740;1770;2109;2167;2229	455;809;899;919;920;1260;1261;1394;2042;2060;2148;2207;2208;2244;2683;2684;2756;2757;2835;2836	716;717;1263;1404;1405;1437;1438;1439;1440;1947;1948;1949;2152;2153;3134;3135;3166;3167;3289;3374;3375;3425;3426;4100;4101;4102;4204;4205;4206;4207;4323;4324;4325	717;1263;1404;1439;1947;2152;3135;3166;3289;3375;3425;4101;4205;4325		370			168
sp|Q06704|IMH1_YEAST	sp|Q06704|IMH1_YEAST	1	1	1	sp|Q06704|IMH1_YEAST Golgin IMH1 OS=Saccharomyces cerevisiae (strain ATCC 204508 / S288c) GN=IMH1 PE=1 SV=1	1	1	1	1	2.2	2.2	2.2	105.22	911	911	1	-2	NaN	NaN	NaN	0	0	Median	0	0	0	#ERROR!			392	1192	TRUE	1225	1563	2408;2409	2408	6;7			698;706
sp|Q07457|BRE1_YEAST	sp|Q07457|BRE1_YEAST	8	8	8	sp|Q07457|BRE1_YEAST E3 ubiquitin-protein ligase BRE1 OS=Saccharomyces cerevisiae (strain ATCC 204508 / S288c) GN=BRE1 PE=1 SV=1	1	8	8	8	12.1	12.1	12.1	80.691	700	700	0	61.827	0.60282	0.97794	7.6633	8	4	Leave out requantified	367000000	230000000	137000000				393	452;501;610;765;1699;1728;1881;1955	True;True;True;True;True;True;True;True	467;516;627;786;1759;1788;1946;2021	606;670;808;1000;2232;2270;2477;2572	963;1065;1262;1554;1555;3409;3462;3769;3912	963;1065;1262;1554;3409;3462;3769;3912		371			585
sp|Q07478|SUB2_YEAST	sp|Q07478|SUB2_YEAST	2	2	2	sp|Q07478|SUB2_YEAST ATP-dependent RNA helicase SUB2 OS=Saccharomyces cerevisiae (strain ATCC 204508 / S288c) GN=SUB2 PE=1 SV=1	1	2	2	2	5.6	5.6	5.6	50.308	446	446	0	11.695	0.68807	1.1416	9.3537	2	0	Median	18035000	10873000	7162600				394	275;624	True;True	284;641	366;824	584;1279	584;1279
sp|Q07528|ATG20_YEAST	sp|Q07528|ATG20_YEAST	36	36	36	sp|Q07528|ATG20_YEAST Autophagy-related protein 20 OS=Saccharomyces cerevisiae (strain ATCC 204508 / S288c) GN=ATG20 PE=1 SV=1	1	36	36	36	57.3	57.3	57.3	72.545	640	640	0	323.31	0.61463	0.97333	8.326	66	11	Leave out requantified	20600000000	12200000000	8400000000				395	44;320;355;442;526;555;696;910;911;916;1193;1194;1195;1211;1213;1285;1422;1449;1580;1716;1763;1810;1843;1869;1877;1879;1888;1909;2222;2317;2352;2564;2565;2585;2586;2595	True;True;True;True;True;True;True;True;True;True;True;True;True;True;True;True;True;True;True;True;True;True;True;True;True;True;True;True;True;True;True;True;True;True;True;True	45;330;331;368;457;541;570;714;932;933;934;939;1226;1227;1228;1244;1246;1247;1321;1464;1465;1498;1499;1636;1776;1823;1870;1871;1906;1907;1933;1942;1944;1953;1974;2299;2397;2436;2654;2655;2656;2679;2680;2689	52;53;427;428;473;594;595;701;737;738;913;914;1193;1194;1195;1196;1197;1202;1203;1564;1565;1566;1567;1588;1589;1591;1592;1593;1689;1690;1868;1869;1911;1912;1913;2074;2075;2253;2254;2313;2375;2376;2377;2378;2426;2427;2428;2457;2469;2471;2472;2473;2484;2514;2925;2926;3046;3102;3383;3384;3385;3386;3411;3412;3413;3414;3427;3428	83;84;85;86;87;672;673;740;944;945;946;947;1114;1115;1167;1168;1169;1428;1429;1430;1431;1849;1850;1851;1852;1853;1854;1855;1864;1865;1866;1867;2410;2411;2412;2413;2414;2415;2416;2447;2448;2449;2450;2452;2453;2454;2455;2456;2457;2458;2459;2460;2461;2462;2463;2606;2607;2608;2875;2876;2877;2878;2940;2941;2942;2943;3187;3188;3189;3438;3439;3440;3521;3522;3616;3617;3618;3619;3620;3621;3622;3697;3698;3…	86;673;740;947;1115;1168;1428;1851;1853;1865;2410;2411;2415;2450;2454;2606;2877;2941;3189;3440;3522;3616;3699;3740;3758;3764;3779;3824;4449;4632;4724;5129;5134;5173;5175;5198		372;373;374;375;376;377;378;379;380	32		80;98;140;209;270;335;459;479;512	363
sp|Q08208|NOP12_YEAST	sp|Q08208|NOP12_YEAST	1	1	1	sp|Q08208|NOP12_YEAST Nucleolar protein 12 OS=Saccharomyces cerevisiae (strain ATCC 204508 / S288c) GN=NOP12 PE=1 SV=1	1	1	1	1	3.1	3.1	3.1	51.941	459	459	0	8.8262	0.63794	1.0386	NaN	1	0	Median	13647000	8123700	5523800				396	1993	TRUE	2062	2625	3999;4000	3999
sp|Q08235|BRX1_YEAST	sp|Q08235|BRX1_YEAST	1	1	1	sp|Q08235|BRX1_YEAST Ribosome biogenesis protein BRX1 OS=Saccharomyces cerevisiae (strain ATCC 204508 / S288c) GN=BRX1 PE=1 SV=2	1	1	1	1	5.5	5.5	5.5	33.531	291	291	0	10.661	0.63479	1.0043	8.2399	2	2	Median	53684000	31996000	21688000				397	511	TRUE	526	683;684	1083;1084	1083
sp|Q08421|ETT1_YEAST	sp|Q08421|ETT1_YEAST	1	1	1	sp|Q08421|ETT1_YEAST Enhancer of translation termination 1 OS=Saccharomyces cerevisiae (strain ATCC 204508 / S288c) GN=ETT1 PE=1 SV=1	1	1	1	1	2.7	2.7	2.7	47.351	412	412	0	5.9333	NaN	NaN	NaN	0	0	Median	0	0	0				398	642	TRUE	659	849	1325	1325
sp|Q08723|RPN8_YEAST	sp|Q08723|RPN8_YEAST	1	1	1	sp|Q08723|RPN8_YEAST 26S proteasome regulatory subunit RPN8 OS=Saccharomyces cerevisiae (strain ATCC 204508 / S288c) GN=RPN8 PE=1 SV=3	1	1	1	1	3.6	3.6	3.6	38.312	338	338	0	7.6591	1.653	2.6726	NaN	1	1	Median	50774000	21025000	29749000				399	1886	TRUE	1951	2482	3775	3775
sp|Q08972|NEW1_YEAST	sp|Q08972|NEW1_YEAST	2	2	2	sp|Q08972|NEW1_YEAST [NU+] prion formation protein 1 OS=Saccharomyces cerevisiae (strain ATCC 204508 / S288c) GN=NEW1 PE=1 SV=1	1	2	2	2	2.7	2.7	2.7	134.33	1196	1196	0	10.847	0.57843	0.94839	23.549	2	0	Median	15382000	10627000	4754800				400	28;1576	True;True	28;1632	34;2068	53;3179	53;3179
sp|Q12035|FCF2_YEAST	sp|Q12035|FCF2_YEAST	1	1	1	sp|Q12035|FCF2_YEAST rRNA-processing protein FCF2 OS=Saccharomyces cerevisiae (strain ATCC 204508 / S288c) GN=FCF2 PE=1 SV=1	1	1	1	1	6	6	6	25.636	217	217	0	6.83	0.81423	1.3208	NaN	1	0	Median	3939500	2008900	1930700				401	1425	TRUE	1468	1873	2883	2883		381			1
sp|Q12118|SGT2_YEAST	sp|Q12118|SGT2_YEAST	1	1	1	sp|Q12118|SGT2_YEAST Small glutamine-rich tetratricopeptide repeat-containing protein 2 OS=Saccharomyces cerevisiae (strain ATCC 204508 / S288c) GN=SGT2 PE=1 SV=1	1	1	1	1	3.8	3.8	3.8	37.218	346	346	1	-2	0.41421	0.68853	NaN	1	1	Median	2278500	1642200	636300	#ERROR!			402	1452	TRUE	1502	1916	2947	2947		382;383;384			276;277;283
sp|Q12136|SAS10_YEAST	sp|Q12136|SAS10_YEAST	1	1	1	sp|Q12136|SAS10_YEAST Something about silencing protein 10 OS=Saccharomyces cerevisiae (strain ATCC 204508 / S288c) GN=SAS10 PE=1 SV=1	1	1	1	1	1.1	1.1	1.1	70.259	610	610	0.002611	5.877	0.64704	1.0356	NaN	1	0	Median	195000000	118000000	77594000				403	1491	TRUE	1544	1965	3017	3017
sp|Q12154|GET3_YEAST	sp|Q12154|GET3_YEAST	1	1	1	sp|Q12154|GET3_YEAST ATPase GET3 OS=Saccharomyces cerevisiae (strain ATCC 204508 / S288c) GN=GET3 PE=1 SV=1	1	1	1	1	2.8	2.8	2.8	39.353	354	354	0	6.2401	0.43685	0.70594	NaN	1	1	Median	22770000	15404000	7365600				404	623	TRUE	640	823	1278	1278
sp|Q12159|YRA1_YEAST	sp|Q12159|YRA1_YEAST	3	3	3	sp|Q12159|YRA1_YEAST RNA annealing protein YRA1 OS=Saccharomyces cerevisiae (strain ATCC 204508 / S288c) GN=YRA1 PE=1 SV=2	1	3	3	3	14.6	14.6	14.6	24.955	226	226	0	20.555	0.63177	1.0207	14.792	3	0	Leave out requantified	217000000	135000000	82540000				405	631;1304;1914	True;True;True	648;1340;1979	833;1711;2520	1292;2635;3833;3834	1292;2635;3833
sp|Q12213|RL7B_YEAST	sp|Q12213|RL7B_YEAST	12	1	1	sp|Q12213|RL7B_YEAST 60S ribosomal protein L7-B OS=Saccharomyces cerevisiae (strain ATCC 204508 / S288c) GN=RPL7B PE=1 SV=3	1	12	1	1	45.9	3.7	3.7	27.696	244	244	0	6.3578	0.55079	0.87862	NaN	1	0	Median	90654000	54981000	35673000				406	12;184;574;813;959;960;1244;1355;1656;1735;2066;2421	False;False;False;False;False;False;False;False;False;False;True;False	12;192;591;834;984;985;1279;1393;1713;1795;2138;2508	15;16;250;762;763;1064;1257;1258;1259;1634;1635;1781;2172;2279;2719;3200;3201	26;27;28;29;394;395;1201;1202;1203;1654;1942;1943;1944;1945;1946;2518;2519;2520;2521;2751;2752;2753;3324;3325;3476;4149;4862;4863;4864	28;395;1201;1654;1943;1944;2518;2752;3325;3476;4149;4862
sp|Q12219|YORA4_YEAST	sp|Q12219|YORA4_YEAST	1	1	1	sp|Q12219|YORA4_YEAST Uncharacterized protein YOR114W OS=Saccharomyces cerevisiae (strain ATCC 204508 / S288c) GN=YOR114W PE=4 SV=1	1	1	1	1	2.4	2.4	2.4	34.975	294	294	1	-2	NaN	NaN	NaN	0	0	Median	0	0	0	#ERROR!			407	1052	TRUE	1082	1388	2145	2145			41			4
sp|Q12250|RPN5_YEAST	sp|Q12250|RPN5_YEAST	4	4	4	sp|Q12250|RPN5_YEAST 26S proteasome regulatory subunit RPN5 OS=Saccharomyces cerevisiae (strain ATCC 204508 / S288c) GN=RPN5 PE=1 SV=3	1	4	4	4	7.2	7.2	7.2	51.768	445	445	0	24.25	0.63309	1.0265	11.963	4	1	Leave out requantified	206000000	120000000	86313000				408	1007;1019;1216;1916	True;True;True;True	1036;1048;1250;1981	1329;1346;1596;2523	2061;2084;2085;2466;3837	2061;2085;2466;3837		385			309
sp|Q12251|YP011_YEAST	sp|Q12251|YP011_YEAST	1	1	1	sp|Q12251|YP011_YEAST Uncharacterized mitochondrial carrier YPR011C OS=Saccharomyces cerevisiae (strain ATCC 204508 / S288c) GN=YPR011C PE=1 SV=1	1	1	1	1	4.3	4.3	4.3	35.913	326	326	0	11.638	0.44797	0.71819	NaN	1	0	Median	4976800	3068400	1908400				409	46	TRUE	47	55	89;90	89
sp|Q12338|RNH2C_YEAST	sp|Q12338|RNH2C_YEAST	4	4	4	sp|Q12338|RNH2C_YEAST Ribonuclease H2 subunit C OS=Saccharomyces cerevisiae (strain ATCC 204508 / S288c) GN=RNH203 PE=1 SV=1	1	4	4	4	54.5	54.5	54.5	12.482	110	110	0	125.69	0.69672	1.1087	8.0447	5	1	Leave out requantified	618000000	419000000	199000000				410	429;598;1324;1821	True;True;True;True	444;615;1362;1882	576;577;795;1741;2394;2395	913;914;915;1245;2700;3646;3647;3648	914;1245;2700;3646
sp|Q12349|ATP14_YEAST	sp|Q12349|ATP14_YEAST	1	1	1	sp|Q12349|ATP14_YEAST ATP synthase subunit H, mitochondrial OS=Saccharomyces cerevisiae (strain ATCC 204508 / S288c) GN=ATP14 PE=1 SV=1	1	1	1	1	11.3	11.3	11.3	14.128	124	124	0	6.3889	0.69379	1.129	NaN	1	0	Median	54892000	28812000	26079000				411	223	TRUE	231	298	467;468	467
sp|Q12377|RPN6_YEAST	sp|Q12377|RPN6_YEAST	2	2	2	sp|Q12377|RPN6_YEAST 26S proteasome regulatory subunit RPN6 OS=Saccharomyces cerevisiae (strain ATCC 204508 / S288c) GN=RPN6 PE=1 SV=3	1	2	2	2	4.8	4.8	4.8	49.773	434	434	0	13.646	0.70703	1.1335	5.595	3	3	Median	50132000	29799000	20332000				412	327;1925	True;True	339;1990	439;440;2533	694;695;3852	694;3852
sp|Q12460|NOP56_YEAST	sp|Q12460|NOP56_YEAST	6	6	6	sp|Q12460|NOP56_YEAST Nucleolar protein 56 OS=Saccharomyces cerevisiae (strain ATCC 204508 / S288c) GN=NOP56 PE=1 SV=1	1	6	6	6	16.7	16.7	16.7	56.863	504	504	0	65.266	0.6416	1.0273	11.24	6	3	Leave out requantified	171000000	100000000	70581000				413	89;678;866;1084;1242;1652	True;True;True;True;True;True	94;696;887;1114;1277;1709	116;891;1135;1429;1631;2167	188;1391;1762;2209;2513;3316	188;1391;1762;2209;2513;3316
sp|Q12499|NOP58_YEAST	sp|Q12499|NOP58_YEAST	5	5	5	sp|Q12499|NOP58_YEAST Nucleolar protein 58 OS=Saccharomyces cerevisiae (strain ATCC 204508 / S288c) GN=NOP58 PE=1 SV=1	1	5	5	5	12.9	12.9	12.9	56.956	511	511	0	51.938	0.64744	1.0388	6.972	5	2	Leave out requantified	148000000	88186000	59636000				414	224;633;1360;1970;2013	True;True;True;True;True	232;650;1398;2037;2084	299;835;1787;2592;2653	469;470;1294;2762;3952;4044	470;1294;2762;3952;4044
sp|Q12506|YO314_YEAST	sp|Q12506|YO314_YEAST	1	1	1	sp|Q12506|YO314_YEAST Putative uncharacterized protein YOR314W OS=Saccharomyces cerevisiae (strain ATCC 204508 / S288c) GN=YOR314W PE=5 SV=1	1	1	1	1	7.3	7.3	7.3	12.523	109	109	1	-2	NaN	NaN	NaN	0	0	Median	0	0	0	#ERROR!			415	570	TRUE	587	758	1197	1197			33;34			54;55
sp|Q12680|GLT1_YEAST	sp|Q12680|GLT1_YEAST	1	1	1	sp|Q12680|GLT1_YEAST Glutamate synthase [NADH] OS=Saccharomyces cerevisiae (strain ATCC 204508 / S288c) GN=GLT1 PE=1 SV=2	1	1	1	1	0.7	0.7	0.7	238.1	2145	2145	0	8.6735	0.54691	0.90158	NaN	1	0	Median	2934700	1735000	1199700				416	512	TRUE	527	685	1085	1085
sp|Q3E7Y3|RS22B_YEAST;sp|P0C0W1|RS22A_YEAST	sp|Q3E7Y3|RS22B_YEAST;sp|P0C0W1|RS22A_YEAST	6;5	6;5	6;5	sp|Q3E7Y3|RS22B_YEAST 40S ribosomal protein S22-B OS=Saccharomyces cerevisiae (strain ATCC 204508 / S288c) GN=RPS22B PE=1 SV=3;sp|P0C0W1|RS22A_YEAST 40S ribosomal protein S22-A OS=Saccharomyces cerevisiae (strain ATCC 204508 / S288c) GN=RPS22A PE=1 SV=2	2	6	6	6	43.1	43.1	43.1	14.626	130	130;130	0	58.095	0.35282	0.56693	4.7539	7	1	Leave out requantified	1140000000	838000000	301000000				417	238;625;1031;1755;2020;2507	True;True;True;True;True;True	246;642;1061;1815;2091;2596	315;825;1360;2302;2661;2662;3310	502;503;1280;2107;2108;3506;3507;4057;4058;4059;4060;5022	502;1280;2107;3506;4057;5022
sp|Q99383|HRP1_YEAST	sp|Q99383|HRP1_YEAST	2	2	2	sp|Q99383|HRP1_YEAST Nuclear polyadenylated RNA-binding protein 4 OS=Saccharomyces cerevisiae (strain ATCC 204508 / S288c) GN=HRP1 PE=1 SV=1	1	2	2	2	6.2	6.2	6.2	59.649	534	534	0	12.628	0.82525	1.3514	0.61915	2	1	Median	24497000	11959000	12538000				418	73;1462	True;True	77;1513	95;1929	156;157;2963	156;2963		386;387			380;387

## Sheet: phosphopeptides
Proteins	Positions within proteins	Leading proteins	Protein	Fasta headers	Localization prob	Score diff	PEP	Score	Delta score	Score for localization	Diagnostic peak	Number of Phospho (ST)	Amino acid	Sequence window	Modification window	Peptide window coverage	Phospho (ST) Probabilities	Phospho (ST) Score diffs	Position in peptide	Charge	Mass error [ppm]	Ratio H/L	Ratio H/L___1	Ratio H/L___2	Ratio H/L___3	Ratio H/L normalized	Ratio H/L normalized___1	Ratio H/L normalized___2	Ratio H/L normalized___3	Ratio H/L unmod. pep.	Ratio H/L localized	Ratio H/L nmods	Ratio H/L variability [%]	Ratio H/L count	Ratio H/L iso-count	Ratio H/L type	Occupancy L	Occupancy H	Intensity	Intensity L	Intensity H	Ratio mod/base L	Ratio mod/base H	Reverse	Potential contaminant	id	Protein group IDs	Positions	Position
sp|P05319|RLA2_YEAST	96	sp|P05319|RLA2_YEAST	sp|P05319|RLA2_YEAST	sp|P05319|RLA2_YEAST 60S acidic ribosomal protein P2-alpha OS=Saccharomyces cerevisiae (strain ATCC 204508 / S288c) GN=RPP2A PE=1 SV=1	0.984557	18.1695	3.99e-05	59.733	59.733	59.733		1	S	DAAAEEEKEEEAAEESDDDMGFGLFD_____	X;X;X;X;X;X;X;X;X;X;X;X;X;X;X;Phospho (ST);X;X;X;Oxidation (M);X;X;X;X;X;X;X;X;X;X;X	PPPPPPPPPPPPPPPPPPPPPPPPPPXXXXX	LAAVPAAGPASAGGAAAAS(0.015)GDAAAEEEKEEEAAEES(0.985)DDDMGFGLFD	LAAVPAAGPAS(-33.53)AGGAAAAS(-18.17)GDAAAEEEKEEEAAEES(18.17)DDDMGFGLFD	36	3	-0.48149	0.67541	0.67541	NaN	NaN	1.098	1.098	NaN	NaN	NaN	#ERROR!	1	NaN	1	0	Median	NaN	NaN	68517000	40676000	27842000	NaN	NaN			0	47	96	96
sp|P07264|LEUC_YEAST	488	sp|P07264|LEUC_YEAST	sp|P07264|LEUC_YEAST	sp|P07264|LEUC_YEAST 3-isopropylmalate dehydratase OS=Saccharomyces cerevisiae (strain ATCC 204508 / S288c) GN=LEU1 PE=1 SV=3	0.992484	21.2075	4.35e-17	309.08	296.81	309.08		1	S	FVDIREFEYKDQDQSSPKVEVTSEDEKELES	X;X;X;X;X;X;X;X;X;X;X;X;X;X;X;Phospho (ST);X;X;X;X;X;Phospho (ST);Phospho (ST);X;X;X;X;X;X;X;X	XXXXXPPPPPPPPPPPPPXXXXXXXXXXXXX	EFEYKDQDQS(0.008)S(0.992)PK	EFEYKDQDQS(-21.21)S(21.21)PK	11	2	0.029616	0.52845	0.52845	NaN	NaN	0.85408	0.85408	NaN	NaN	0.92113	#ERROR!	1	NaN	1	0	Median	0	0	45191000	29319000	15872000	0.015748	0.013659			1	76	488	488
sp|P07264|LEUC_YEAST	495	sp|P07264|LEUC_YEAST	sp|P07264|LEUC_YEAST	sp|P07264|LEUC_YEAST 3-isopropylmalate dehydratase OS=Saccharomyces cerevisiae (strain ATCC 204508 / S288c) GN=LEU1 PE=1 SV=3	0.998702	28.8617	2.43e-31	285.77	285.77	193.83		1	S	EYKDQDQSSPKVEVTSEDEKELESAAYDHAE	X;X;X;X;X;X;X;X;Phospho (ST);X;X;X;X;X;X;Phospho (ST);X;X;X;X;X;X;X;X;X;X;X;X;X;X;X	XXXXXXXXXXXPPPPPPPPPPPPPPPPPPPP	VEVT(0.001)S(0.999)EDEK	VEVT(-28.86)S(28.86)EDEK	5	1	-0.04733	0.60638	0.60638	NaN	NaN	0.96903	0.96903	NaN	NaN	0.88164	#ERROR!	1	12.632	3	0	Median	0.75723	0.77418	1550000000	942000000	611000000	0.51613	0.54068			2	76	495	495
sp|P11746|MCM1_YEAST	2	sp|P11746|MCM1_YEAST	sp|P11746|MCM1_YEAST	sp|P11746|MCM1_YEAST Pheromone receptor transcription factor OS=Saccharomyces cerevisiae (strain ATCC 204508 / S288c) GN=MCM1 PE=1 SV=2	1	99.6004	2.2e-08	166.62	152.45	166.62		1	S	______________MSDIEEGTPTNNGQQKE	X;X;X;X;X;X;X;X;X;X;X;X;X;X;X;Phospho (ST);X;X;X;X;X;X;X;X;X;X;X;X;X;X;X	XXXXXXXXXXXXXXXPPPPPPPPPPPPPPPX	S(1)DIEEGTPTNNGQQK	S(99.6)DIEEGT(-99.6)PT(-132.29)NNGQQK	1	2	-0.27617	0.58021	0.58021	NaN	NaN	0.95117	0.95117	NaN	NaN	NaN	#ERROR!	1	NaN	1	0	Median	NaN	NaN	20878000	13075000	7803000	NaN	NaN			3	126	2	2
sp|P18962|DAP2_YEAST	453	sp|P18962|DAP2_YEAST	sp|P18962|DAP2_YEAST	sp|P18962|DAP2_YEAST Dipeptidyl aminopeptidase B OS=Saccharomyces cerevisiae (strain ATCC 204508 / S288c) GN=DAP2 PE=1 SV=2	0.5	0	0.037668	50.12	10.901	50.12		1	S	GPLAFDSMENRLYFISTRKSSTERHVYYIDL	X;X;X;X;X;X;X;X;X;X;X;X;X;X;X;Phospho (ST);X;X;X;X;X;X;X;X;X;X;X;X;X;X;X	XXXXXXXXXXXPPPPPPPPXXXXXXXXXXXX	LYFIS(0.5)T(0.5)RK	LYFIS(0)T(0)RK	5	2	2.2874	0.045241	0.045241	NaN	NaN	0.07278	0.07278	NaN	NaN	NaN		1	NaN	1	1	Median	NaN	NaN	34954000	31475000	3479100	NaN	NaN			4	148	453	453
sp|P34225|YEL1_YEAST	191	sp|P34225|YEL1_YEAST	sp|P34225|YEL1_YEAST	sp|P34225|YEL1_YEAST Guanine-nucleotide exchange factor YEL1 OS=Saccharomyces cerevisiae (strain ATCC 204508 / S288c) GN=YEL1 PE=1 SV=1	0.638296	0	0.041252	41.967	13.386	41.967		2	S	WIACHPNTHWKSGYKSCHIVLFSLLILNSDL	X;X;X;X;X;X;X;X;X;X;X;X;X;X;X;Phospho (ST);X;X;X;X;X;X;X;X;X;X;X;X;Phospho (ST);X;X	XXXXXXXXXXXXXXXPPPPPPPPPPPPPPPP	S(0.638)CHIVLFS(0.638)LLILNS(0.723)DLHNNFQVDHK	S(0)CHIVLFS(0)LLILNS(1.17)DLHNNFQVDHK	1	2	-1.7285	0.23059	NaN	0.23059	NaN	0.37536	NaN	0.37536	NaN	NaN		2	NaN	1	1	Median	NaN	NaN	65775000	58943000	6831600	NaN	NaN			5	217	191	191
sp|P34225|YEL1_YEAST	198	sp|P34225|YEL1_YEAST	sp|P34225|YEL1_YEAST	sp|P34225|YEL1_YEAST Guanine-nucleotide exchange factor YEL1 OS=Saccharomyces cerevisiae (strain ATCC 204508 / S288c) GN=YEL1 PE=1 SV=1	0.638296	0	0.041252	41.967	13.386	41.967		2	S	THWKSGYKSCHIVLFSLLILNSDLHNNFQVD	X;X;X;X;X;X;X;X;X;X;X;X;X;X;X;X;X;X;X;X;X;X;X;X;X;X;X;X;X;X;X	XXXXXXXXXXXXXXXXXXXXXXXXXXXXXXX	S(0.638)CHIVLFS(0.638)LLILNS(0.723)DLHNNFQVDHK	S(0)CHIVLFS(0)LLILNS(1.17)DLHNNFQVDHK	8	2	-1.7285	0.23059	NaN	0.23059	NaN	0.37536	NaN	0.37536	NaN	NaN		2	NaN	1	1	Median	NaN	NaN	65775000	58943000	6831600	NaN	NaN			6	217	198	198
sp|P34225|YEL1_YEAST	204	sp|P34225|YEL1_YEAST	sp|P34225|YEL1_YEAST	sp|P34225|YEL1_YEAST Guanine-nucleotide exchange factor YEL1 OS=Saccharomyces cerevisiae (strain ATCC 204508 / S288c) GN=YEL1 PE=1 SV=1	0.723407	1.16512	0.041252	41.967	13.386	41.967		2	S	YKSCHIVLFSLLILNSDLHNNFQVDHKKIKF	X;X;Phospho (ST);X;X;X;X;X;X;X;X;X;X;X;X;Phospho (ST);X;X;X;X;X;X;X;X;X;X;X;X;X;X;X	XXPPPPPPPPPPPPPPPPPPPPPPPPPXXXX	S(0.638)CHIVLFS(0.638)LLILNS(0.723)DLHNNFQVDHK	S(0)CHIVLFS(0)LLILNS(1.17)DLHNNFQVDHK	14	2	-1.7285	0.23059	NaN	0.23059	NaN	0.37536	NaN	0.37536	NaN	NaN		2	NaN	1	1	Median	NaN	NaN	65775000	58943000	6831600	NaN	NaN			7	217	204	204
sp|P34233|ASH1_YEAST	388	sp|P34233|ASH1_YEAST	sp|P34233|ASH1_YEAST	sp|P34233|ASH1_YEAST Transcriptional regulatory protein ASH1 OS=Saccharomyces cerevisiae (strain ATCC 204508 / S288c) GN=ASH1 PE=1 SV=1	0.999839	37.6638	0.045205	69.598	22.516	69.598		1	S	RDILSNNSKSNVRKPSKNKISKQASNVFGNT	X;X;X;X;X;X;X;X;X;X;X;X;X;X;X;Phospho (ST);GlyGly (K);X;GlyGly (K);X;X;X;X;X;X;X;X;X;X;X;X	XXXXXXXXXXXXXPPPPPPPPPXXXXXXXXX	KPS(1)KNKISK	KPS(37.66)KNKIS(-37.66)K	3	2	-2.5816																		21370000	21370000	0	NaN	NaN			8	218	388	388
sp|P34252|SLD2_YEAST	266	sp|P34252|SLD2_YEAST	sp|P34252|SLD2_YEAST	sp|P34252|SLD2_YEAST DNA replication regulator SLD2 OS=Saccharomyces cerevisiae (strain ATCC 204508 / S288c) GN=SLD2 PE=1 SV=1	0.5	0	0.03969	42.599	6.1741	42.599		1	S	TSFSPSPLIRRPLTKSLIELAREHTEIVKEF	X;X;X;X;X;X;X;X;X;X;X;X;X;X;X;X;X;X;X;X;X;X;X;X;X;X;X;X;X;X;X	XXXXXXXXXXXXXXXXXXXXXXXXXXXXXXX	PLT(0.5)KS(0.5)LIELAR	PLT(0)KS(0)LIELAR	5	2	-0.41528	0.53843	0.53843	NaN	NaN	0.86921	0.86921	NaN	NaN	NaN		1	NaN	1	0	Median	NaN	NaN	76079000	48484000	27595000	NaN	NaN			9	220	266	266
sp|P38351|PAF1_YEAST	147	sp|P38351|PAF1_YEAST	sp|P38351|PAF1_YEAST	sp|P38351|PAF1_YEAST RNA polymerase II-associated protein 1 OS=Saccharomyces cerevisiae (strain ATCC 204508 / S288c) GN=PAF1 PE=1 SV=1	1	104.177	1.84e-09	183.15	170.85	183.15		1	S	DNTSLKRKRRLDDGDSDDENLDVNHIISRVE	X;X;X;X;X;X;X;X;X;X;X;X;X;X;X;Phospho (ST);X;X;X;X;X;X;X;X;X;X;X;X;X;X;X	XXXXXXXXXXPPPPPPPPPPPPPPPPPPPXX	LDDGDS(1)DDENLDVNHIISR	LDDGDS(104.18)DDENLDVNHIIS(-104.18)R	6	3	0.01462	0.63442	0.63442	NaN	NaN	1.0096	1.0096	NaN	NaN	NaN	#ERROR!	1	NaN	1	0	Median	NaN	NaN	105000000	60405000	44451000	NaN	NaN			10	244	147	147
sp|P38439|LEO1_YEAST	105	sp|P38439|LEO1_YEAST	sp|P38439|LEO1_YEAST	sp|P38439|LEO1_YEAST RNA polymerase-associated protein LEO1 OS=Saccharomyces cerevisiae (strain ATCC 204508 / S288c) GN=LEO1 PE=1 SV=1	1	172.065	3.27e-09	176.09	176.09	176.09		1	S	DDEGENINHRSRHRESLGLDDDEAEEQAMYT	X;X;X;X;X;X;X;X;X;X;X;X;X;X;X;Phospho (ST);X;X;X;X;X;X;X;X;X;X;X;X;Oxidation (M);X;X	XXXXXXXXXXXXPPPPPPPPPPPPPPPPPPP	HRES(1)LGLDDDEAEEQAMYTR	HRES(172.06)LGLDDDEAEEQAMYT(-172.06)R	4	3	0.04586	0.70724	0.70724	NaN	NaN	1.1268	1.1268	NaN	NaN	NaN	#ERROR!	1	NaN	1	0	Median	NaN	NaN	94406000	53545000	40860000	NaN	NaN			11	247	105	105
sp|P38439|LEO1_YEAST	372	sp|P38439|LEO1_YEAST	sp|P38439|LEO1_YEAST	sp|P38439|LEO1_YEAST RNA polymerase-associated protein LEO1 OS=Saccharomyces cerevisiae (strain ATCC 204508 / S288c) GN=LEO1 PE=1 SV=1	0.985203	21.44	0.017173	64.224	48.61	64.224		1	S	ESPDAAFETGFRKQNSPTTYGASRRNEYEED	X;X;X;X;X;X;X;X;X;X;X;X;X;X;X;Phospho (ST);X;X;X;X;X;X;X;X;X;X;X;X;X;X;X	XXXXXXXXXXXXPPPPPPPPPPPPXXXXXXX	KQNS(0.985)PT(0.007)T(0.007)YGAS(0.001)R	KQNS(21.44)PT(-21.44)T(-21.44)YGAS(-31.79)R	4	2	0.7935	1.0364	1.0364	NaN	NaN	1.7054	1.7054	NaN	NaN	1.4003	#ERROR!	1	NaN	1	0	Median	0	0	20430000	10285000	10145000	1.3843	1.4124			12	247	372	372
sp|P38691|KSP1_YEAST	903	sp|P38691|KSP1_YEAST	sp|P38691|KSP1_YEAST	sp|P38691|KSP1_YEAST Serine/threonine-protein kinase KSP1 OS=Saccharomyces cerevisiae (strain ATCC 204508 / S288c) GN=KSP1 PE=1 SV=1	0.78714	5.6877	0.01636	64.841	9.7289	64.841		1	S	SNPLHMNKALEKLSSSPGAKSSFVGFPKPLL	X;X;X;X;X;X;X;X;X;X;X;X;X;X;X;Phospho (ST);X;X;X;X;X;X;X;X;X;X;X;X;X;X;X	XXXXXXXXXXXXPPPPPPPPXXXXXXXXXXX	LSS(0.212)S(0.787)PGAK	LS(-32.97)S(-5.69)S(5.69)PGAK	4	2	-0.1908	0.55802	0.55802	NaN	NaN	0.92159	0.92159	NaN	NaN	NaN	#ERROR!	1	NaN	1	0	Median	NaN	NaN	2837200	1771800	1065500	NaN	NaN			13	250	903	903
sp|P40433|6P21_YEAST	667	sp|P40433|6P21_YEAST	sp|P40433|6P21_YEAST	sp|P40433|6P21_YEAST 6-phosphofructo-2-kinase 1 OS=Saccharomyces cerevisiae (strain ATCC 204508 / S288c) GN=PFK26 PE=1 SV=1	0.999834	37.8208	2.73e-19	240.42	230.58	240.42		1	S	SARSSFASDFLSRKRSNPTSASSSQSELSEQ	Phospho (ST);X;X;X;Phospho (ST);X;X;X;X;X;X;X;X;X;X;Phospho (ST);X;X;X;X;X;X;X;X;X;X;X;X;X;X;X	XXXXXXXXXXXXXXXPPPPPPPPPPPPPPPP	S(1)NPTSASSSQSELSEQPK	S(37.82)NPT(-37.82)S(-61.32)AS(-93.62)S(-124.29)S(-138.92)QS(-160.75)ELS(-193.88)EQPK	1	2	-0.32667	0.65171	0.65171	NaN	NaN	1.0391	1.0391	NaN	NaN	0.9915	#ERROR!	1	NaN	1	0	Median	0	0	32573000	21284000	11289000	0.10586	0.077757			14	291	667	667
sp|P40433|6P21_YEAST	656	sp|P40433|6P21_YEAST	sp|P40433|6P21_YEAST	sp|P40433|6P21_YEAST 6-phosphofructo-2-kinase 1 OS=Saccharomyces cerevisiae (strain ATCC 204508 / S288c) GN=PFK26 PE=1 SV=1	0.708559	3.85837	0.004633	88.338	68.134	88.338		1	S	RRYSVIPTAPPSARSSFASDFLSRKRSNPTS	X;X;X;X;X;X;X;X;X;X;X;Phospho (ST);X;X;X;Phospho (ST);X;X;X;X;X;X;X;X;X;X;Phospho (ST);X;X;X;X	XXXXXXXXXXXXXXPPPPPPPPPPXXXXXXX	S(0.291)S(0.709)FASDFLSR	S(-3.86)S(3.86)FAS(-49.76)DFLS(-77.43)R	2	2	-0.07787	0.71259	0.71259	NaN	NaN	1.1341	1.1341	NaN	NaN	1.2165		1	NaN	1	0	Median	0	0	100000000	56365000	43707000	0.15343	0.1524			15	291	656	656
sp|P40433|6P21_YEAST	652	sp|P40433|6P21_YEAST	sp|P40433|6P21_YEAST	sp|P40433|6P21_YEAST 6-phosphofructo-2-kinase 1 OS=Saccharomyces cerevisiae (strain ATCC 204508 / S288c) GN=PFK26 PE=1 SV=1	0.999323	31.6898	0.002095	94.781	94.781	94.781		1	S	VYNERRYSVIPTAPPSARSSFASDFLSRKRS	X;X;X;X;X;X;X;X;X;X;X;X;X;X;X;Phospho (ST);X;X;X;Phospho (ST);X;X;X;X;X;X;X;X;X;X;Phospho (ST)	XXXXXXPPPPPPPPPPPPXXXXXXXXXXXXX	YSVIPT(0.001)APPS(0.999)AR	YS(-79.39)VIPT(-31.69)APPS(31.69)AR	10	2	-0.07164	0.89404	0.89404	NaN	NaN	1.4529	1.4529	NaN	NaN	1.0168	#ERROR!	1	NaN	1	0	Median	0.21537	0.28172	69258000	36389000	32869000	0.16938	0.22039			16	291	652	652
sp|P40850|MKT1_YEAST	389	sp|P40850|MKT1_YEAST	sp|P40850|MKT1_YEAST	sp|P40850|MKT1_YEAST Protein MKT1 OS=Saccharomyces cerevisiae (strain ATCC 204508 / S288c) GN=MKT1 PE=1 SV=2	0.33332	0	0.031115	49.358	49.358	49.358			S	TTVTKNASEKLTYEKSSTKEVRKPRDIPNDV	X;X;X;X;X;X;X;X;X;X;X;X;X;X;X;Phospho (ST);X;X;X;X;X;X;X;X;X;X;X;X;X;X;X	XXXXXXXXXXPPPPPPPPPXXXXXXXXXXXX	LTYEKS(0.333)S(0.333)T(0.333)K	LT(-39.35)YEKS(0)S(0)T(0)K	6	2	-1.3041																		0	0	0	NaN	NaN			17	294	389	389
sp|P40850|MKT1_YEAST	390	sp|P40850|MKT1_YEAST	sp|P40850|MKT1_YEAST	sp|P40850|MKT1_YEAST Protein MKT1 OS=Saccharomyces cerevisiae (strain ATCC 204508 / S288c) GN=MKT1 PE=1 SV=2	0.33332	0	0.031115	49.358	49.358	49.358			S	TVTKNASEKLTYEKSSTKEVRKPRDIPNDVH	X;X;X;X;X;X;X;X;X;X;X;X;X;X;X;X;X;X;X;X;X;X;X;X;X;X;X;X;X;X;X	XXXXXXXXXXXXXXXXXXXXXXXXXXXXXXX	LTYEKS(0.333)S(0.333)T(0.333)K	LT(-39.35)YEKS(0)S(0)T(0)K	7	2	-1.3041																		0	0	0	NaN	NaN			18	294	390	390
sp|P53064|RTF1_YEAST	17	sp|P53064|RTF1_YEAST	sp|P53064|RTF1_YEAST	sp|P53064|RTF1_YEAST RNA polymerase-associated protein RTF1 OS=Saccharomyces cerevisiae (strain ATCC 204508 / S288c) GN=RTF1 PE=1 SV=2	0.999289	32.8724	0.002809	81.566	81.566	81.566		1	S	SDLDEDLLALAGADESEEEDQVLTTTSAKRA	X;X;X;X;X;X;X;X;X;X;X;X;X;X;X;Phospho (ST);X;X;X;X;X;X;X;X;X;X;X;X;X;X;X	PPPPPPPPPPPPPPPPPPPPPPPPPPPPPXX	SDLDEDLLALAGADES(0.999)EEEDQVLT(0.001)TTSAK	S(-56)DLDEDLLALAGADES(32.87)EEEDQVLT(-32.87)T(-38.66)T(-43.68)S(-48.49)AK	16	3	-0.05863	0.57677	0.57677	NaN	NaN	0.92393	0.92393	NaN	NaN	1.1565	#ERROR!	1	NaN	1	0	Median	0.43672	0.38249	5069800	3118600	1951200	1.8439	1.5234			19	328	17	17
sp|P89105|CTR9_YEAST	974	sp|P89105|CTR9_YEAST	sp|P89105|CTR9_YEAST	sp|P89105|CTR9_YEAST RNA polymerase-associated protein CTR9 OS=Saccharomyces cerevisiae (strain ATCC 204508 / S288c) GN=CTR9 PE=1 SV=3	1	64.9017	4.93e-09	193.44	187.93	193.44		2	S	EREAMAISEHNVKDDSDLSDKDNEYDEEKPR	X;X;X;X;Oxidation (M);X;X;X;X;X;X;X;X;X;X;Phospho (ST);X;X;Phospho (ST);X;X;X;X;X;X;X;X;X;X;X;X	XXPPPPPPPPPPPPPPPPPPPPPPPPPPPPP	EAMAISEHNVKDDS(1)DLS(1)DKDNEYDEEKPR	EAMAIS(-64.9)EHNVKDDS(64.9)DLS(77.73)DKDNEYDEEKPR	14	4	0.10368	0.61007	NaN	0.61007	NaN	0.97744	NaN	0.97744	NaN	NaN	#ERROR!	2	NaN	1	1	Median	NaN	NaN	154000000	109000000	45044000	NaN	NaN			20	348	974	974
sp|P89105|CTR9_YEAST	977	sp|P89105|CTR9_YEAST	sp|P89105|CTR9_YEAST	sp|P89105|CTR9_YEAST RNA polymerase-associated protein CTR9 OS=Saccharomyces cerevisiae (strain ATCC 204508 / S288c) GN=CTR9 PE=1 SV=3	1	77.7338	4.93e-09	193.44	187.93	193.44		2	S	AMAISEHNVKDDSDLSDKDNEYDEEKPRQKR	X;Oxidation (M);X;X;X;X;X;X;X;X;X;X;Phospho (ST);X;X;Phospho (ST);X;X;X;X;X;X;X;X;X;X;X;X;X;X;X	PPPPPPPPPPPPPPPPPPPPPPPPPPPPXXX	EAMAISEHNVKDDS(1)DLS(1)DKDNEYDEEKPR	EAMAIS(-64.9)EHNVKDDS(64.9)DLS(77.73)DKDNEYDEEKPR	17	4	0.10368	0.61007	NaN	0.61007	NaN	0.97744	NaN	0.97744	NaN	NaN	#ERROR!	2	NaN	1	1	Median	NaN	NaN	154000000	109000000	45044000	NaN	NaN			21	348	977	977
sp|Q00684|CDC14_YEAST	548	sp|Q00684|CDC14_YEAST	sp|Q00684|CDC14_YEAST	sp|Q00684|CDC14_YEAST Tyrosine-protein phosphatase CDC14 OS=Saccharomyces cerevisiae (strain ATCC 204508 / S288c) GN=CDC14 PE=1 SV=2	0.999918	40.8847	0.023677	66.994	31.888	66.994		1	S	RRTTSAAGGIRKISGSIKK____________	X;X;X;X;X;X;X;X;X;X;X;X;X;X;X;Phospho (ST);X;X;X;X;X;X;X;X;X;X;X;X;X;X;X	XXXXXXXXXXXXPPPPPPPXXXXXXXXXXXX	ISGS(1)IKK	IS(-40.88)GS(40.88)IKK	4	2	-0.62199	0.028608	0.028608	NaN	NaN	0.046551	0.046551	NaN	NaN	NaN	#ERROR!	1	NaN	1	1	Median	NaN	NaN	8887300	8598800	288520	NaN	NaN			22	351	548	548
sp|Q01448|HPC2_YEAST	424	sp|Q01448|HPC2_YEAST	sp|Q01448|HPC2_YEAST	sp|Q01448|HPC2_YEAST Histone promoter control protein 2 OS=Saccharomyces cerevisiae (strain ATCC 204508 / S288c) GN=HPC2 PE=1 SV=2	1	61.2126	0.033086	61.213	45.069	61.213		2	S	AKNSTSNVRKEPTAKSPKRLVAAPTVSPPKI	X;X;X;X;X;X;X;X;X;GlyGly (K);X;X;Phospho (ST);X;X;Phospho (ST);X;X;X;X;X;X;X;X;X;X;X;X;X;X;X	XXXXXXXXXPPPPPPPPPXXXXXXXXXXXXX	KEPT(1)AKS(1)PK	KEPT(61.21)AKS(61.21)PK	7	2	-0.38873	0.54483	NaN	0.54483	NaN	0.87309	NaN	0.87309	NaN	NaN	#ERROR!	2	NaN	1	0	Median	NaN	NaN	7118200	4258400	2859800	NaN	NaN			23	353	424	424
sp|Q04116|YHP1_YEAST	98	sp|Q04116|YHP1_YEAST	sp|Q04116|YHP1_YEAST	sp|Q04116|YHP1_YEAST Homeobox protein YHP1 OS=Saccharomyces cerevisiae (strain ATCC 204508 / S288c) GN=YHP1 PE=1 SV=1	0.333331	0	0.044865	52.79	30.451	52.79			S	RVTTSMTPLSKPKKLSSHSPFTPTVRVCSKE	X;X;X;X;X;X;X;X;X;X;X;X;GlyGly (K);X;X;Phospho (ST);X;X;X;X;X;X;X;X;X;X;X;X;X;X;X	XXXXXXXXXXXPPPPPPPPPPPPPPPXXXXX	PKKLS(0.333)S(0.333)HS(0.333)PFTPTVR	PKKLS(0)S(0)HS(0)PFT(-49.26)PT(-49.26)VR	5	2	-2.0759																		0	0	0	NaN	NaN			24	378	98	98
sp|Q04116|YHP1_YEAST	99	sp|Q04116|YHP1_YEAST	sp|Q04116|YHP1_YEAST	sp|Q04116|YHP1_YEAST Homeobox protein YHP1 OS=Saccharomyces cerevisiae (strain ATCC 204508 / S288c) GN=YHP1 PE=1 SV=1	0.333331	0	0.044865	52.79	30.451	52.79			S	VTTSMTPLSKPKKLSSHSPFTPTVRVCSKEQ	X;X;X;X;X;X;X;X;X;X;X;X;X;X;X;X;X;X;X;X;X;X;X;X;X;X;X;X;X;X;X	XXXXXXXXXXXXXXXXXXXXXXXXXXXXXXX	PKKLS(0.333)S(0.333)HS(0.333)PFTPTVR	PKKLS(0)S(0)HS(0)PFT(-49.26)PT(-49.26)VR	6	2	-2.0759																		0	0	0	NaN	NaN			25	378	99	99
sp|Q04116|YHP1_YEAST	101	sp|Q04116|YHP1_YEAST	sp|Q04116|YHP1_YEAST	sp|Q04116|YHP1_YEAST Homeobox protein YHP1 OS=Saccharomyces cerevisiae (strain ATCC 204508 / S288c) GN=YHP1 PE=1 SV=1	0.333331	0	0.044865	52.79	30.451	52.79			S	TSMTPLSKPKKLSSHSPFTPTVRVCSKEQPP	X;X;X;X;X;X;X;X;X;X;X;X;X;X;X;X;X;X;X;X;X;X;X;X;X;X;X;X;X;X;X	XXXXXXXXXXXXXXXXXXXXXXXXXXXXXXX	PKKLS(0.333)S(0.333)HS(0.333)PFTPTVR	PKKLS(0)S(0)HS(0)PFT(-49.26)PT(-49.26)VR	8	2	-2.0759																		0	0	0	NaN	NaN			26	378	101	101
sp|Q04264|PDS5_YEAST	1167	sp|Q04264|PDS5_YEAST	sp|Q04264|PDS5_YEAST	sp|Q04264|PDS5_YEAST Sister chromatid cohesion protein PDS5 OS=Saccharomyces cerevisiae (strain ATCC 204508 / S288c) GN=PDS5 PE=1 SV=1	0.998426	28.0077	0.03548	57.348	18.326	57.348		2	S	TVQEAQLSFKTYIPESLTEKIQNNIKAKIGR	X;X;X;X;X;X;X;X;X;X;Phospho (ST);X;X;X;X;Phospho (ST);X;X;X;X;X;X;X;X;X;X;X;X;X;X;X	XXXXXXXXXXPPPPPPPPPPXXXXXXXXXXX	T(0.997)YIPES(0.998)LT(0.005)EK	T(24.83)YIPES(28.01)LT(-24.83)EK	6	2	1.8051																		15305000	0	15305000	NaN	NaN			27	379	1167	1167
sp|Q06409|YL422_YEAST	1800	sp|Q06409|YL422_YEAST	sp|Q06409|YL422_YEAST	sp|Q06409|YL422_YEAST DOCK-like protein YLR422W OS=Saccharomyces cerevisiae (strain ATCC 204508 / S288c) GN=YLR422W PE=1 SV=1	1	55.6035	0.045184	55.604	20.887	55.604		1	S	LTLHAELLPSKDLKPSHDLLVRLFEENFAEE	X;X;X;X;X;X;X;X;X;X;X;X;X;X;X;Phospho (ST);X;X;X;X;X;X;X;X;X;X;X;X;X;X;X	XXXXXXXXXXXXXXPPPPPPPPXXXXXXXXX	PS(1)HDLLVR	PS(55.6)HDLLVR	2	2	2.313																		0	0	0	NaN	NaN			28	387	1800	1800
sp|Q06485|ATG33_YEAST	109	sp|Q06485|ATG33_YEAST	sp|Q06485|ATG33_YEAST	sp|Q06485|ATG33_YEAST Autophagy-related protein 33 OS=Saccharomyces cerevisiae (strain ATCC 204508 / S288c) GN=ATG33 PE=1 SV=1	0.727742	1.26106	0.028518	61.78	16.619	61.78		2	S	LGCASNYQSRKYSKVSKESSLFPEDSKLAAS	X;X;X;X;X;X;X;X;X;X;X;X;X;X;X;Phospho (ST);X;X;Phospho (ST);X;X;X;X;X;X;X;X;X;X;X;X	XXXXXXXXXXXXXXPPPPPPPPPPPPPXXXX	VS(0.728)KES(0.636)S(0.636)LFPEDSK	VS(1.26)KES(0)S(0)LFPEDS(-38.36)K	2	2	1.2695	0.039108	NaN	0.039108	NaN	0.063221	NaN	0.063221	NaN	NaN		2	NaN	1	1	Median	NaN	NaN	44553000	41695000	2858200	NaN	NaN			29	388	109	109
sp|Q06485|ATG33_YEAST	112	sp|Q06485|ATG33_YEAST	sp|Q06485|ATG33_YEAST	sp|Q06485|ATG33_YEAST Autophagy-related protein 33 OS=Saccharomyces cerevisiae (strain ATCC 204508 / S288c) GN=ATG33 PE=1 SV=1	0.636058	0	0.028518	61.78	16.619	61.78		2	S	ASNYQSRKYSKVSKESSLFPEDSKLAASELS	X;X;X;X;X;X;X;X;X;X;X;X;Phospho (ST);X;X;Phospho (ST);X;X;X;X;X;X;X;X;X;X;X;X;X;X;X	XXXXXXXXXXXPPPPPPPPPPPPPXXXXXXX	VS(0.728)KES(0.636)S(0.636)LFPEDSK	VS(1.26)KES(0)S(0)LFPEDS(-38.36)K	5	2	1.2695	0.039108	NaN	0.039108	NaN	0.063221	NaN	0.063221	NaN	NaN		2	NaN	1	1	Median	NaN	NaN	44553000	41695000	2858200	NaN	NaN			30	388	112	112
sp|Q06485|ATG33_YEAST	113	sp|Q06485|ATG33_YEAST	sp|Q06485|ATG33_YEAST	sp|Q06485|ATG33_YEAST Autophagy-related protein 33 OS=Saccharomyces cerevisiae (strain ATCC 204508 / S288c) GN=ATG33 PE=1 SV=1	0.636062	0	0.028518	61.78	16.619	61.78		2	S	SNYQSRKYSKVSKESSLFPEDSKLAASELSD	X;X;X;X;X;X;X;X;X;X;X;X;X;X;X;X;X;X;X;X;X;X;X;X;X;X;X;X;X;X;X	XXXXXXXXXXXXXXXXXXXXXXXXXXXXXXX	VS(0.728)KES(0.636)S(0.636)LFPEDSK	VS(1.26)KES(0)S(0)LFPEDS(-38.36)K	6	2	1.2695	0.039108	NaN	0.039108	NaN	0.063221	NaN	0.063221	NaN	NaN		2	NaN	1	1	Median	NaN	NaN	44553000	41695000	2858200	NaN	NaN			31	388	113	113
sp|Q07528|ATG20_YEAST	363	sp|Q07528|ATG20_YEAST	sp|Q07528|ATG20_YEAST	sp|Q07528|ATG20_YEAST Autophagy-related protein 20 OS=Saccharomyces cerevisiae (strain ATCC 204508 / S288c) GN=ATG20 PE=1 SV=1	0.999541	35.0612	8.39e-07	170.95	137.68	170.95		1	S	NKESNDKKMDKERSKSFTNIEQDYKQYENLL	X;X;X;X;X;X;X;X;X;X;X;X;X;X;X;Phospho (ST);X;X;X;X;X;X;X;X;X;X;X;X;X;X;X	XXXXXXXXXXXXXPPPPPPPPPPPPXXXXXX	SKS(1)FTNIEQDYK	S(-35.06)KS(35.06)FT(-38.3)NIEQDYK	3	2	-0.35434	0.548	0.548	NaN	NaN	0.88505	0.88505	NaN	NaN	NaN	#ERROR!	1	NaN	1	0	Median	NaN	NaN	75744000	46810000	28934000	NaN	NaN			32	395	363	363
sp|Q12506|YO314_YEAST	54	sp|Q12506|YO314_YEAST	sp|Q12506|YO314_YEAST	sp|Q12506|YO314_YEAST Putative uncharacterized protein YOR314W OS=Saccharomyces cerevisiae (strain ATCC 204508 / S288c) GN=YOR314W PE=5 SV=1	0.5	0	0.04003	41.302	16.483	41.302		1	S	LNDRIDEHRCKEVQLSSLRSLLYAMILNRTI	X;X;X;X;X;X;X;X;X;X;X;X;X;X;X;Phospho (ST);X;X;X;X;X;X;X;X;X;X;X;X;X;X;X	XXXXXXXXXXXPPPPPPPPXXXXXXXXXXXX	EVQLS(0.5)S(0.5)LR	EVQLS(0)S(0)LR	5	1	1.634	0.34941	0.34941	NaN	NaN	0.58327	0.58327	NaN	NaN	NaN		1	NaN	1	0	Median	NaN	NaN	16990000	12338000	4651800	NaN	NaN			33	415	54	54
sp|Q12506|YO314_YEAST	55	sp|Q12506|YO314_YEAST	sp|Q12506|YO314_YEAST	sp|Q12506|YO314_YEAST Putative uncharacterized protein YOR314W OS=Saccharomyces cerevisiae (strain ATCC 204508 / S288c) GN=YOR314W PE=5 SV=1	0.5	0	0.04003	41.302	16.483	41.302		1	S	NDRIDEHRCKEVQLSSLRSLLYAMILNRTIG	X;X;X;X;X;X;X;X;X;X;X;X;X;X;X;X;X;X;X;X;X;X;X;X;X;X;X;X;X;X;X	XXXXXXXXXXXXXXXXXXXXXXXXXXXXXXX	EVQLS(0.5)S(0.5)LR	EVQLS(0)S(0)LR	6	1	1.634	0.34941	0.34941	NaN	NaN	0.58327	0.58327	NaN	NaN	NaN		1	NaN	1	0	Median	NaN	NaN	16990000	12338000	4651800	NaN	NaN			34	415	55	55
sp|P07264|LEUC_YEAST	494	sp|P07264|LEUC_YEAST	sp|P07264|LEUC_YEAST	sp|P07264|LEUC_YEAST 3-isopropylmalate dehydratase OS=Saccharomyces cerevisiae (strain ATCC 204508 / S288c) GN=LEU1 PE=1 SV=3	0.542506	0.831613	1.86e-11	150.51	150.51	150.51		1	T	FEYKDQDQSSPKVEVTSEDEKELESAAYDHA	X;X;X;X;X;X;X;X;X;Phospho (ST);X;X;X;X;X;Phospho (ST);X;X;X;X;X;X;X;X;X;X;X;X;X;X;X	XXXXXXXXXXXXPPPPPPPPPPPPPPPPPPP	VEVT(0.543)S(0.448)EDEKELES(0.01)AAYDHAEPVQPEDAPQDIANDELK	VEVT(0.83)S(-0.83)EDEKELES(-17.55)AAYDHAEPVQPEDAPQDIANDELK	4	4	0.22664	0.54358	0.54358	NaN	NaN	0.85343	0.85343	NaN	NaN	0.88164		1	NaN	1	0	Median	0	0	2190000000	1370000000	817000000	0.74984	0.72356			35	76	494	494
sp|P18962|DAP2_YEAST	454	sp|P18962|DAP2_YEAST	sp|P18962|DAP2_YEAST	sp|P18962|DAP2_YEAST Dipeptidyl aminopeptidase B OS=Saccharomyces cerevisiae (strain ATCC 204508 / S288c) GN=DAP2 PE=1 SV=2	0.5	0	0.037668	50.12	10.901	50.12		1	T	PLAFDSMENRLYFISTRKSSTERHVYYIDLR	X;X;X;X;X;X;X;X;X;X;X;X;X;X;X;X;X;X;X;X;X;X;X;X;X;X;X;X;X;X;X	XXXXXXXXXXXXXXXXXXXXXXXXXXXXXXX	LYFIS(0.5)T(0.5)RK	LYFIS(0)T(0)RK	6	2	2.2874	0.045241	0.045241	NaN	NaN	0.07278	0.07278	NaN	NaN	NaN		1	NaN	1	1	Median	NaN	NaN	34954000	31475000	3479100	NaN	NaN			36	148	454	454
sp|P34252|SLD2_YEAST	264	sp|P34252|SLD2_YEAST	sp|P34252|SLD2_YEAST	sp|P34252|SLD2_YEAST DNA replication regulator SLD2 OS=Saccharomyces cerevisiae (strain ATCC 204508 / S288c) GN=SLD2 PE=1 SV=1	0.5	0	0.03969	42.599	6.1741	42.599		1	T	ISTSFSPSPLIRRPLTKSLIELAREHTEIVK	X;X;X;X;X;X;X;X;X;X;X;X;X;X;X;Phospho (ST);GlyGly (K);X;X;X;X;X;X;X;X;X;X;X;X;X;X	XXXXXXXXXXXXXPPPPPPPPPPPXXXXXXX	PLT(0.5)KS(0.5)LIELAR	PLT(0)KS(0)LIELAR	3	2	-0.41528	0.53843	0.53843	NaN	NaN	0.86921	0.86921	NaN	NaN	NaN		1	NaN	1	0	Median	NaN	NaN	76079000	48484000	27595000	NaN	NaN			37	220	264	264
sp|P40850|MKT1_YEAST	391	sp|P40850|MKT1_YEAST	sp|P40850|MKT1_YEAST	sp|P40850|MKT1_YEAST Protein MKT1 OS=Saccharomyces cerevisiae (strain ATCC 204508 / S288c) GN=MKT1 PE=1 SV=2	0.33332	0	0.031115	49.358	49.358	49.358			T	VTKNASEKLTYEKSSTKEVRKPRDIPNDVHD	X;X;X;X;X;X;X;X;X;X;X;X;X;X;X;X;X;X;X;X;X;X;X;X;X;X;X;X;X;X;X	XXXXXXXXXXXXXXXXXXXXXXXXXXXXXXX	LTYEKS(0.333)S(0.333)T(0.333)K	LT(-39.35)YEKS(0)S(0)T(0)K	8	2	-1.3041																		0	0	0	NaN	NaN			38	294	391	391
sp|Q01448|HPC2_YEAST	421	sp|Q01448|HPC2_YEAST	sp|Q01448|HPC2_YEAST	sp|Q01448|HPC2_YEAST Histone promoter control protein 2 OS=Saccharomyces cerevisiae (strain ATCC 204508 / S288c) GN=HPC2 PE=1 SV=2	1	61.2126	0.033086	61.213	45.069	61.213		2	T	STEAKNSTSNVRKEPTAKSPKRLVAAPTVSP	X;X;X;X;X;X;X;X;X;X;X;X;GlyGly (K);X;X;Phospho (ST);X;X;Phospho (ST);X;X;X;X;X;X;X;X;X;X;X;X	XXXXXXXXXXXXPPPPPPPPPXXXXXXXXXX	KEPT(1)AKS(1)PK	KEPT(61.21)AKS(61.21)PK	4	2	-0.38873	0.54483	NaN	0.54483	NaN	0.87309	NaN	0.87309	NaN	NaN	#ERROR!	2	NaN	1	0	Median	NaN	NaN	7118200	4258400	2859800	NaN	NaN			39	353	421	421
sp|Q04264|PDS5_YEAST	1162	sp|Q04264|PDS5_YEAST	sp|Q04264|PDS5_YEAST	sp|Q04264|PDS5_YEAST Sister chromatid cohesion protein PDS5 OS=Saccharomyces cerevisiae (strain ATCC 204508 / S288c) GN=PDS5 PE=1 SV=1	0.996724	24.825	0.03548	57.348	18.326	57.348		2	T	FKPFATVQEAQLSFKTYIPESLTEKIQNNIK	X;X;X;X;X;X;X;X;X;X;X;X;X;X;X;Phospho (ST);X;X;X;X;Phospho (ST);X;X;X;X;X;X;X;X;X;X	XXXXXXXXXXXXXXXPPPPPPPPPPXXXXXX	T(0.997)YIPES(0.998)LT(0.005)EK	T(24.83)YIPES(28.01)LT(-24.83)EK	1	2	1.8051																		15305000	0	15305000	NaN	NaN			40	379	1162	1162
sp|Q12219|YORA4_YEAST	4	sp|Q12219|YORA4_YEAST	sp|Q12219|YORA4_YEAST	sp|Q12219|YORA4_YEAST Uncharacterized protein YOR114W OS=Saccharomyces cerevisiae (strain ATCC 204508 / S288c) GN=YOR114W PE=4 SV=1	1	58.6868	0.047652	58.687	28.52	58.687		1	T	____________MKATLLLKAQLSPVSYTTK	X;X;X;X;X;X;X;X;X;X;X;X;X;GlyGly (K);X;Phospho (ST);X;X;X;X;X;X;X;X;X;X;X;X;X;X;X	XXXXXXXXXXXXXPPPPPPPXXXXXXXXXXX	KAT(1)LLLK	KAT(58.69)LLLK	3	2	-0.94005	0.51568	0.51568	NaN	NaN	0.82655	0.82655	NaN	NaN	NaN	#ERROR!	1	NaN	1	0	Median	NaN	NaN	24905000	15817000	9088200	NaN	NaN			41	407	4	4
[truncated: 16 more columns]

## Sheet: digly_peptides
Proteins	Positions within proteins	Leading proteins	Protein	Fasta headers	Localization prob	Score diff	PEP	Score	Delta score	Score for localization	Diagnostic peak	Number of GlyGly (K)	Amino acid	Sequence window	Modification window	Peptide window coverage	GlyGly (K) Probabilities	GlyGly (K) Score diffs	Position in peptide	Charge	Mass error [ppm]	Ratio H/L	Ratio H/L___1	Ratio H/L___2	Ratio H/L___3	Ratio H/L normalized	Ratio H/L normalized___1	Ratio H/L normalized___2	Ratio H/L normalized___3	Ratio H/L unmod. pep.	Ratio H/L localized	Ratio H/L nmods	Ratio H/L variability [%]	Ratio H/L count	Ratio H/L iso-count	Ratio H/L type	Occupancy L	Occupancy H	Intensity	Intensity L	Intensity H	Ratio mod/base L	Ratio mod/base H	Reverse	Potential contaminant	id	Protein group IDs	Positions	Position
sp|P19659|MED15_YEAST	609	sp|P19659|MED15_YEAST	sp|P19659|MED15_YEAST	sp|P19659|MED15_YEAST Mediator of RNA polymerase II transcription subunit 15 OS=Saccharomyces cerevisiae (strain ATCC 204508 / S288c) GN=GAL11 PE=1 SV=3	1	74.8487	0.017973	74.849	30.733	74.849		2	K	GIFVVKLDTVDRLIIKYQKYWESMRIQILRR	X;X;X;X;X;X;X;X;X;X;X;X;X;X;X;GlyGly (K);X;X;GlyGly (K);X;X;X;X;X;X;X;X;X;X;X;X	XXXXXXXXXXXXPPPPPPPXXXXXXXXXXXX	LIIK(1)YQK(1)	LIIK(74.85)YQK(74.85)	4	2	0.40135	0.017932	NaN	0.017932	NaN	0.028981	NaN	0.028981	NaN	NaN	#ERROR!	2	NaN	1	1	Median	NaN	NaN	37222000	36475000	746830	NaN	NaN			0	151	609	609
sp|P19659|MED15_YEAST	612	sp|P19659|MED15_YEAST	sp|P19659|MED15_YEAST	sp|P19659|MED15_YEAST Mediator of RNA polymerase II transcription subunit 15 OS=Saccharomyces cerevisiae (strain ATCC 204508 / S288c) GN=GAL11 PE=1 SV=3	1	74.8487	0.017973	74.849	30.733	74.849		2	K	VVKLDTVDRLIIKYQKYWESMRIQILRRQAI	X;X;X;X;X;X;X;X;X;X;X;X;GlyGly (K);X;X;GlyGly (K);X;X;X;X;X;X;X;X;X;X;X;X;X;X;X	XXXXXXXXXPPPPPPPXXXXXXXXXXXXXXX	LIIK(1)YQK(1)	LIIK(74.85)YQK(74.85)	7	2	0.40135	0.017932	NaN	0.017932	NaN	0.028981	NaN	0.028981	NaN	NaN	#ERROR!	2	NaN	1	1	Median	NaN	NaN	37222000	36475000	746830	NaN	NaN			1	151	612	612
sp|P32048|SYKM_YEAST	484	sp|P32048|SYKM_YEAST	sp|P32048|SYKM_YEAST	sp|P32048|SYKM_YEAST Lysine--tRNA ligase, mitochondrial OS=Saccharomyces cerevisiae (strain ATCC 204508 / S288c) GN=MSK1 PE=1 SV=3	1	53.466	0.030808	53.466	46.273	53.466		1	K	DPQNKQVTKRFEVFIKGKEYINAYEEENCPQ	X;X;X;X;X;X;X;X;X;X;X;X;X;X;X;GlyGly (K);X;X;X;X;X;X;X;X;X;X;X;X;X;X;X	XXXXXXXXXPPPPPPPXXXXXXXXXXXXXXX	RFEVFIK(1)	RFEVFIK(53.47)	7	2	-2.5715	3.1356	3.1356	NaN	NaN	5.0061	5.0061	NaN	NaN	NaN	#ERROR!	1	NaN	1	0	Median	NaN	NaN	25400000	4138600	21261000	NaN	NaN			2	188	484	484
sp|P34252|SLD2_YEAST	265	sp|P34252|SLD2_YEAST	sp|P34252|SLD2_YEAST	sp|P34252|SLD2_YEAST DNA replication regulator SLD2 OS=Saccharomyces cerevisiae (strain ATCC 204508 / S288c) GN=SLD2 PE=1 SV=1	1	42.5986	0.03969	42.599	6.1741	42.599		1	K	STSFSPSPLIRRPLTKSLIELAREHTEIVKE	X;X;X;X;X;X;X;X;X;X;X;X;X;X;Phospho (ST);GlyGly (K);X;X;X;X;X;X;X;X;X;X;X;X;X;X;X	XXXXXXXXXXXXPPPPPPPPPPPXXXXXXXX	PLTK(1)SLIELAR	PLTK(42.6)SLIELAR	4	2	-0.41528	0.53843	0.53843	NaN	NaN	0.86921	0.86921	NaN	NaN	NaN	#ERROR!	1	NaN	1	0	Median	NaN	NaN	76079000	48484000	27595000	NaN	NaN			3	220	265	265
sp|P42935|ELP2_YEAST	56	sp|P42935|ELP2_YEAST	sp|P42935|ELP2_YEAST	sp|P42935|ELP2_YEAST Elongator complex protein 2 OS=Saccharomyces cerevisiae (strain ATCC 204508 / S288c) GN=ELP2 PE=1 SV=1	1	74.8318	0.028506	74.832	26.486	74.832		1	K	WDPIEPNNKGVYATLKGHEAEVTCVRFVPDS	X;X;X;X;X;X;X;X;X;X;X;X;X;X;X;GlyGly (K);X;X;X;X;X;X;X;X;X;X;X;X;X;X;X	XXXXXXXXXPPPPPPPXXXXXXXXXXXXXXX	GVYATLK(1)	GVYATLK(74.83)	7	1	0.41222	0.45641	0.45641	NaN	NaN	0.75189	0.75189	NaN	NaN	NaN	#ERROR!	1	NaN	1	1	Median	NaN	NaN	20302000	13776000	6526000	NaN	NaN			4	303	56	56
sp|Q01448|HPC2_YEAST	418	sp|Q01448|HPC2_YEAST	sp|Q01448|HPC2_YEAST	sp|Q01448|HPC2_YEAST Histone promoter control protein 2 OS=Saccharomyces cerevisiae (strain ATCC 204508 / S288c) GN=HPC2 PE=1 SV=2	0.646433	2.62053	0.033086	61.213	45.069	61.213		1	K	GGNSTEAKNSTSNVRKEPTAKSPKRLVAAPT	X;X;X;X;X;X;X;X;X;X;X;X;X;X;X;GlyGly (K);X;X;Phospho (ST);X;X;Phospho (ST);X;X;X;X;X;X;X;X;X	XXXXXXXXXXXXXXXPPPPPPPPPXXXXXXX	K(0.646)EPTAK(0.354)SPK	K(2.62)EPTAK(-2.62)SPK(-61.21)	1	2	-0.38873	0.54483	0.54483	NaN	NaN	0.87309	0.87309	NaN	NaN	NaN		1	NaN	1	0	Median	NaN	NaN	7118200	4258400	2859800	NaN	NaN			5	353	418	418
sp|Q06704|IMH1_YEAST	698	sp|Q06704|IMH1_YEAST	sp|Q06704|IMH1_YEAST	sp|Q06704|IMH1_YEAST Golgin IMH1 OS=Saccharomyces cerevisiae (strain ATCC 204508 / S288c) GN=IMH1 PE=1 SV=1	1	74.4602	0.021034	74.46	50.27	74.46		2	K	EKNKLEAELDLQTSRKATELQEWKHTVTELK	X;X;X;X;X;X;X;X;X;X;X;X;X;X;X;GlyGly (K);X;X;X;X;X;X;X;GlyGly (K);X;X;X;X;X;X;X	XXXXPPPPPPPPPPPPPPPPPPPPXXXXXXX	LEAELDLQTSRK(1)ATELQEWK(1)	LEAELDLQTSRK(74.46)ATELQEWK(74.46)	12	2	1.5186	0.001889	NaN	0.001889	NaN	0.002966	NaN	0.002966	NaN	NaN	#ERROR!	2	NaN	1	1	Median	NaN	NaN	3270000000	3260000000	4697900	NaN	NaN			6	392	698	698
sp|Q06704|IMH1_YEAST	706	sp|Q06704|IMH1_YEAST	sp|Q06704|IMH1_YEAST	sp|Q06704|IMH1_YEAST Golgin IMH1 OS=Saccharomyces cerevisiae (strain ATCC 204508 / S288c) GN=IMH1 PE=1 SV=1	1	74.4602	0.021034	74.46	50.27	74.46		2	K	LDLQTSRKATELQEWKHTVTELKSEIHALKL	X;X;X;X;X;X;X;GlyGly (K);X;X;X;X;X;X;X;GlyGly (K);X;X;X;X;X;X;X;X;X;X;X;X;X;X;X	PPPPPPPPPPPPPPPPXXXXXXXXXXXXXXX	LEAELDLQTSRK(1)ATELQEWK(1)	LEAELDLQTSRK(74.46)ATELQEWK(74.46)	20	2	1.5186	0.001889	NaN	0.001889	NaN	0.002966	NaN	0.002966	NaN	NaN	#ERROR!	2	NaN	1	1	Median	NaN	NaN	3270000000	3260000000	4697900	NaN	NaN			7	392	706	706
[truncated: 16 more columns]
