# Supplementary material for: Ubiquitination drives COPI priming and Golgi SNARE localization
Source: eLife journal article supplement (doi:10.7554/elife.80911), 2022-07-29
Supplement: data1 [file Figure 7 Source Data 1.xlsx]

## Sheet: protein_groups
Protein IDs	Majority protein IDs	Peptide counts (all)	Peptide counts (razor+unique)	Peptide counts (unique)	Fasta headers	Number of proteins	Peptides	Razor + unique peptides	Unique peptides	Sequence coverage [%]	Unique + razor sequence coverage [%]	Unique sequence coverage [%]	Mol. weight [kDa]	Sequence length	Sequence lengths	Q-value	Score	Ratio H/L	Ratio H/L normalized	Ratio H/L variability [%]	Ratio H/L count	Ratio H/L iso-count	Ratio H/L type	Intensity	Intensity L	Intensity H	Only identified by site	Reverse	Potential contaminant	id	Peptide IDs	Peptide is razor	Mod. peptide IDs	Evidence IDs	MS/MS IDs	Best MS/MS	GlyGly (K) site IDs	Oxidation (M) site IDs	Phospho (ST) site IDs	GlyGly (K) site positions	Oxidation (M) site positions	Phospho (ST) site positions
CON__P00761	CON__P00761	5	5	5		1	5	5	5	25.1	25.1	25.1	24.409	231	231	0	59.302	0.011395	0.021641	106.97	7	7	Median	30000000000	29800000000	129000000			#ERROR!	0	1058;1059;1412;1597;2583	True;True;True;True;True	1116;1117;1118;1492;1691;2773	1538;1539;1540;1541;1542;1543;2053;2301;2302;3783	2304;2305;2306;2307;2308;2309;3077;3433;3434;3435;5657	2307;2309;3077;3435;5657		0			94
CON__P08779;CON__P02533;CON__Q3ZAW8;CON__A2A4G1;CON__Q9Z2K1;CON__P08727;CON__P19001;CON__Q04695;CON__Q9QWL7;CON__Q6IFX2;CON__P19012;CON__P13646-1;CON__Q61782;CON__Q8N1A0;CON__Q9D312;CON__P35900;CON__ENSEMBL:ENSP00000377550;CON__P08730-1	CON__P08779;CON__P02533;CON__Q3ZAW8;CON__A2A4G1;CON__Q9Z2K1;CON__P08727;CON__P19001;CON__Q04695;CON__Q9QWL7;CON__Q6IFX2;CON__P19012	4;4;3;3;3;2;2;2;2;2;2;1;1;1;1;1;1;1	3;3;2;2;2;2;2;2;2;2;2;1;1;1;1;1;1;1	3;3;2;2;2;2;2;2;2;2;2;1;1;1;1;1;1;1	;;;;;;;;;;	18	4	3	3	8	6.1	6.1	51.267	473	473;472;474;456;469;400;403;432;433;452;456;458;93;295;431;424;420;437	0	19.519	0.057329	0.11331	253.24	3	3	Median	381000000	190000000	191000000			#ERROR!	1	179;1383;2690;2782	True;True;True;False	194;1462;2890;2988	281;2012;3936;4076	423;3006;5883;6085	423;3006;5883;6085		1			121
CON__P48668;CON__P04259;CON__P02538;CON__P13647;CON__Q8VED5;CON__O95678;CON__Q5XKE5;CON__P19013	CON__P48668;CON__P04259;CON__P02538;CON__P13647	5;5;5;4;2;2;1;1	1;1;1;1;0;0;0;0	1;1;1;1;0;0;0;0	;;;	8	5	1	1	9.6	2.7	2.7	60.024	564	564;564;564;590;531;551;535;594	0	11.803	0.020141	0.036961	NaN	1	1	Median	26223000	25535000	688020			#ERROR!	2	169;1476;1790;1794;2005	False;False;False;False;True	184;1563;1918;1922;2152	268;2142;2606;2607;2611;2919;2920	405;3199;3874;3875;3879;4343;4344	405;3199;3875;3879;4343
CON__P04264;CON__Q6IFZ6;CON__H-INV:HIT000016045;CON__P05787;CON__Q9R0H5;CON__Q7Z794	CON__P04264	16;2;1;1;1;1	16;2;1;1;1;1	8;0;0;0;0;0		6	16	16	8	25.9	25.9	15.8	66.017	644	644;572;99;483;524;578	0	150.34	0.033802	0.064381	180.44	11	11	Median	3170000000	3090000000	85003000			#ERROR!	3	353;371;666;840;1570;1788;1790;1812;1985;2140;2141;2203;2219;2231;2432;2833	True;True;True;True;True;True;True;True;True;True;True;True;True;True;True;True	377;395;705;886;1664;1916;1918;1945;1946;2130;2293;2294;2362;2378;2390;2609;3045	529;530;553;978;1210;2268;2604;2606;2607;2645;2646;2647;2648;2886;3112;3113;3217;3218;3241;3242;3257;3561;4155	792;793;828;1461;1809;3383;3872;3874;3875;3939;3940;3941;3942;4294;4615;4616;4777;4778;4809;4810;4831;5304;6199	793;828;1461;1809;3383;3872;3875;3939;4294;4615;4616;4777;4809;4831;5304;6199		2;3;4			259;262;296
CON__P13645;CON__P02535-1;CON__Q7Z3Z0;CON__Q7Z3Y8;CON__Q148H6;CON__Q7Z3Y7;CON__Q7Z3Y9	CON__P13645	12;5;2;2;2;2;1	12;5;2;2;2;2;1	11;4;1;1;1;1;0		7	12	12	11	20.6	20.6	19.1	59.51	593	593;570;450;459;464;486;468	0	76.045	0.10389	0.19773	106.13	7	7	Median	989000000	954000000	34577000			#ERROR!	4	23;115;252;1132;1891;2029;2142;2143;2284;2285;2308;2782	True;True;True;True;True;True;True;True;True;True;True;True	23;125;269;1200;2027;2176;2295;2296;2452;2453;2477;2988	30;173;383;1659;2754;2954;3114;3115;3342;3343;3344;3379;4076	47;265;580;2485;4104;4389;4617;4618;4975;4976;4977;5020;5021;6085	47;265;580;2485;4104;4389;4617;4618;4975;4976;5020;6085		1			150
CON__P35527	CON__P35527	14	14	14		1	14	14	14	31.1	31.1	31.1	62.129	623	623	0	180.89	0.075385	0.14783	176.09	10	10	Median	3240000000	1680000000	1560000000			#ERROR!	5	288;704;779;780;910;1065;1702;1960;1975;2128;2165;2323;2471;2745	True;True;True;True;True;True;True;True;True;True;True;True;True;True	306;746;824;825;962;1124;1820;2101;2119;2281;2321;2492;2650;2949	435;1032;1134;1135;1321;1322;1551;2471;2849;2872;3096;3152;3400;3616;4025	661;1549;1687;1688;1992;1993;2317;3667;4244;4275;4595;4668;5061;5386;6017	661;1549;1687;1688;1993;2317;3667;4244;4275;4595;4668;5061;5386;6017		5;6;7;8;9			157;234;245;276;286
CON__P35908;CON__P35908v2;CON__Q6NXH9	CON__P35908;CON__P35908v2	8;8;2	7;7;1	4;4;0	;	3	8	7	4	13.2	11.3	6.8	65.865	645	645;639;539	0	45.37	0.091041	0.16809	48.752	5	5	Median	425000000	390000000	34933000			#ERROR!	6	169;354;666;1476;1794;2206;2354;2601	True;True;False;True;True;True;True;True	184;378;705;1563;1922;2365;2525;2791	268;531;978;2142;2611;3224;3446;3808	405;794;1461;3199;3879;4787;5120;5698	405;794;1461;3199;3879;4787;5120;5698		10			300
REV__sp|P06783|STE3_YEAST	REV__sp|P06783|STE3_YEAST	1	1	1	sp|P06783|STE3_YEAST Pheromone a factor receptor OS=Saccharomyces cerevisiae (strain ATCC 204508 / S288c) GN=STE3 PE=1 SV=1	1	1	1	1	0	0	0	53.708	470	470	0.007853	6.2876	0.779	1.4854	NaN	1	0	Median	216000000	120000000	96713000		#ERROR!		7	1522	TRUE	1611	2198	3280;3281	3280
REV__sp|P0C155|CBPS2_YEAST	REV__sp|P0C155|CBPS2_YEAST	1	1	1	sp|P0C155|CBPS2_YEAST Putative carboxypeptidase YOL153C OS=Saccharomyces cerevisiae (strain ATCC 204508 / S288c) GN=YOL153C PE=5 SV=1	1	1	1	1	0	0	0	65.092	581	581	0.005249	6.3188	0.43562	0.83089	NaN	1	0	Median	94627000	63511000	31116000		#ERROR!		8	1956	TRUE	2097	2844	4237	4237
REV__sp|P31244|RAD16_YEAST	REV__sp|P31244|RAD16_YEAST	1	1	1	sp|P31244|RAD16_YEAST DNA repair protein RAD16 OS=Saccharomyces cerevisiae (strain ATCC 204508 / S288c) GN=RAD16 PE=1 SV=1	1	1	1	1	0	0	0	91.429	790	790	1	-2	0.31401	0.59838	NaN	1	0	Median	95062000	70519000	24543000	#ERROR!	#ERROR!		9	1527	TRUE	1618	2210	3302	3302		11			222
REV__sp|P31376|SWC3_YEAST	REV__sp|P31376|SWC3_YEAST	2	2	2	sp|P31376|SWC3_YEAST SWR1-complex protein 3 OS=Saccharomyces cerevisiae (strain ATCC 204508 / S288c) GN=SWC3 PE=1 SV=2	1	2	2	2	0	0	0	72.514	625	625	0.003106	10.801	0.22592	0.42367	185	2	0	Median	115000000	90520000	24099000		#ERROR!		10	1333;1431	True;True	1410;1514	1942;2079	2897;3113	2897;3113
REV__sp|Q00416|SEN1_YEAST	REV__sp|Q00416|SEN1_YEAST	1	1	1	sp|Q00416|SEN1_YEAST Helicase SEN1 OS=Saccharomyces cerevisiae (strain ATCC 204508 / S288c) GN=SEN1 PE=1 SV=2	1	1	1	1	0	0	0	252.49	2231	2231	0.009732	5.7369	0.38918	0.70994	NaN	1	0	Median	18915000	13505000	5409200		#ERROR!		11	2648	TRUE	2843	3879	5800;5801	5801
REV__sp|Q06218|DBP9_YEAST	REV__sp|Q06218|DBP9_YEAST	1	1	1	sp|Q06218|DBP9_YEAST ATP-dependent RNA helicase DBP9 OS=Saccharomyces cerevisiae (strain ATCC 204508 / S288c) GN=DBP9 PE=1 SV=1	1	1	1	1	0	0	0	68.059	594	594	1	-2	NaN	NaN	NaN	0	0	Median	0	0	0	#ERROR!	#ERROR!		12	1697	TRUE	1812	2460	3650	3650		12			114
REV__sp|Q12080|NOP53_YEAST	REV__sp|Q12080|NOP53_YEAST	1	1	1	sp|Q12080|NOP53_YEAST Ribosome biogenesis protein NOP53 OS=Saccharomyces cerevisiae (strain ATCC 204508 / S288c) GN=NOP53 PE=1 SV=1	1	1	1	1	0	0	0	52.555	455	455	1	-2	0.36627	0.87402	NaN	1	1	Median	887000000	606000000	281000000	#ERROR!	#ERROR!		13	2638	TRUE	2833	3867	5785	5785		13			328
sp|A0A0B7P3V8|YP41B_YEAST;sp|P0C2J7|YH41B_YEAST;sp|P47024|YJ41B_YEAST	sp|A0A0B7P3V8|YP41B_YEAST;sp|P0C2J7|YH41B_YEAST;sp|P47024|YJ41B_YEAST	1;1;1	1;1;1	1;1;1	sp|A0A0B7P3V8|YP41B_YEAST Transposon Ty4-P Gag-Pol polyprotein OS=Saccharomyces cerevisiae (strain ATCC 204508 / S288c) GN=TY4B-P PE=5 SV=2;sp|P0C2J7|YH41B_YEAST Transposon Ty4-H Gag-Pol polyprotein OS=Saccharomyces cerevisiae (strain ATCC 204508 / S288c)	3	1	1	1	1.2	1.2	1.2	127.19	1104	1104;1802;1803	0.007371	5.8636	NaN	NaN	NaN	0	0	Median	0	0	0				14	1689	TRUE	1802	2446	3635	3635		14	0		524	532
sp|O13563|RPN13_YEAST	sp|O13563|RPN13_YEAST	1	1	1	sp|O13563|RPN13_YEAST 26S proteasome regulatory subunit RPN13 OS=Saccharomyces cerevisiae (strain ATCC 204508 / S288c) GN=RPN13 PE=1 SV=1	1	1	1	1	12.8	12.8	12.8	17.902	156	156	0.002646	6.4589	0.56256	0.9962	15.283	2	1	Median	5569000	3647400	1921600				15	500	TRUE	531	737;738	1124;1125	1124		15			74
sp|O14455|RL36B_YEAST	sp|O14455|RL36B_YEAST	6	6	1	sp|O14455|RL36B_YEAST 60S ribosomal protein L36-B OS=Saccharomyces cerevisiae (strain ATCC 204508 / S288c) GN=RPL36B PE=1 SV=3	1	6	6	1	49	49	9	11.135	100	100	0	55.443	0.39639	0.78095	9.1468	11	1	Leave out requantified	4020000000	2590000000	1430000000				16	106;460;2066;2415;2609;2786	True;True;True;True;True;True	112;113;490;2215;2587;2800;2992;2993	150;151;152;683;684;3004;3530;3531;3820;4081;4082;4083	231;232;233;234;1029;1030;1031;4458;5235;5236;5716;5717;5718;6090;6091;6092;6093	234;1031;4458;5235;5716;6092		16;17			20;90
sp|O94742|SEM1_YEAST	sp|O94742|SEM1_YEAST	1	1	1	sp|O94742|SEM1_YEAST 26S proteasome complex subunit SEM1 OS=Saccharomyces cerevisiae (strain ATCC 204508 / S288c) GN=SEM1 PE=1 SV=1	1	1	1	1	13.5	13.5	13.5	10.386	89	89	0.002833	7.0527	0.97685	1.7943	NaN	1	0	Median	28322000	12542000	15780000				17	2314	TRUE	2483	3387	5034	5034
sp|P00330|ADH1_YEAST;sp|P00331|ADH2_YEAST;sp|P38113|ADH5_YEAST	sp|P00330|ADH1_YEAST	20;7;1	20;7;1	18;6;1	sp|P00330|ADH1_YEAST Alcohol dehydrogenase 1 OS=Saccharomyces cerevisiae (strain ATCC 204508 / S288c) GN=ADH1 PE=1 SV=5	3	20	20	18	68.7	68.7	60.6	36.849	348	348;348;351	0	260.75	0.41971	0.89935	8.4794	42	5	Leave out requantified	36500000000	25600000000	10900000000				18	137;140;190;233;296;298;391;485;865;1018;1542;2098;2185;2192;2198;2698;2699;2809;2944;2969	True;True;True;True;True;True;True;True;True;True;True;True;True;True;True;True;True;True;True;True	147;152;153;205;249;314;316;417;516;912;1075;1635;1636;2248;2249;2342;2351;2357;2899;2900;3017;3163;3191	207;208;215;216;217;218;219;294;295;357;445;447;448;588;715;716;1248;1249;1250;1482;1483;2231;2232;2233;2234;3048;3049;3050;3186;3187;3203;3204;3211;3212;3948;3949;3950;3951;3952;4112;4325;4326;4370;4371	320;321;322;323;324;331;332;333;334;335;336;337;442;443;444;445;446;541;542;676;678;679;680;681;877;878;879;1093;1094;1095;1874;1875;1876;1877;2216;2217;2218;2219;3331;3332;3333;3334;3335;3336;3337;4521;4522;4523;4727;4728;4757;4758;4759;4760;4768;4769;4770;5901;5902;5903;5904;5905;5906;5907;6133;6134;6438;6439;6440;6441;6503;6504;6505;6506;6507	324;336;445;541;676;680;877;1094;1874;2216;3337;4522;4727;4757;4770;5902;5905;6133;6440;6503		18;19;20			76;169;271
sp|P00358|G3P2_YEAST	sp|P00358|G3P2_YEAST	20	4	3	sp|P00358|G3P2_YEAST Glyceraldehyde-3-phosphate dehydrogenase 2 OS=Saccharomyces cerevisiae (strain ATCC 204508 / S288c) GN=TDH2 PE=1 SV=3	1	20	4	3	61.1	21.4	14.2	35.846	332	332	0	37.619	0.20495	0.3884	19.989	7	4	Median	972000000	799000000	173000000				19	501;582;583;976;1173;1312;1606;1645;1882;2541;2571;2677;2709;2743;2798;2799;2811;2850;2851;2868	False;False;False;True;False;False;False;False;True;False;False;True;False;False;False;False;False;False;True;False	532;619;620;1032;1245;1389;1700;1701;1743;2018;2728;2761;2875;2876;2910;2947;3006;3007;3019;3020;3021;3063;3064;3082	739;740;860;861;862;1421;1720;1914;2315;2316;2368;2738;3728;3767;3918;3919;3920;3964;3965;4021;4022;4023;4098;4099;4114;4115;4116;4117;4184;4185;4186;4187;4212	1126;1127;1128;1288;1289;1290;1291;1292;2130;2581;2582;2859;3454;3455;3456;3528;3529;4082;5562;5563;5564;5565;5566;5567;5568;5569;5570;5571;5572;5573;5574;5634;5635;5861;5862;5863;5923;5924;6012;6013;6014;6112;6113;6114;6137;6138;6139;6140;6141;6238;6239;6240;6241;6283;6284;6285	1126;1288;1292;2130;2581;2859;3456;3529;4082;5568;5634;5861;5923;6012;6112;6114;6140;6238;6241;6284		21;22;23;24;25			128;131;173;179;229
sp|P00359|G3P3_YEAST	sp|P00359|G3P3_YEAST	23	23	6	sp|P00359|G3P3_YEAST Glyceraldehyde-3-phosphate dehydrogenase 3 OS=Saccharomyces cerevisiae (strain ATCC 204508 / S288c) GN=TDH3 PE=1 SV=3	1	23	23	6	69.9	69.9	30.1	35.746	332	332	0	249.47	0.20436	0.43132	17.662	37	10	Leave out requantified	16100000000	13100000000	2990000000				20	501;582;583;921;968;978;979;1173;1312;1606;1645;1925;2541;2571;2676;2709;2743;2798;2799;2811;2850;2852;2868	True;True;True;True;True;True;True;True;True;True;True;True;True;True;True;True;True;True;True;True;True;True;True	532;619;620;973;1023;1024;1034;1035;1245;1389;1700;1701;1743;2063;2064;2728;2761;2873;2874;2910;2947;3006;3007;3019;3020;3021;3063;3065;3082	739;740;860;861;862;1338;1409;1410;1423;1424;1720;1914;2315;2316;2368;2800;2801;3728;3767;3914;3915;3916;3917;3964;3965;4021;4022;4023;4098;4099;4114;4115;4116;4117;4184;4185;4188;4212	1126;1127;1128;1288;1289;1290;1291;1292;2028;2117;2118;2132;2133;2581;2582;2859;3454;3455;3456;3528;3529;4170;4171;5562;5563;5564;5565;5566;5567;5568;5569;5570;5571;5572;5573;5574;5634;5635;5855;5856;5857;5858;5859;5860;5923;5924;6012;6013;6014;6112;6113;6114;6137;6138;6139;6140;6141;6238;6239;6242;6283;6284;6285	1126;1288;1292;2028;2118;2132;2133;2581;2859;3456;3529;4171;5568;5634;5860;5923;6012;6112;6114;6140;6238;6242;6284		21;22;23;26;27			44;128;131;173;229
sp|P00549|KPYK1_YEAST	sp|P00549|KPYK1_YEAST	33	33	32	sp|P00549|KPYK1_YEAST Pyruvate kinase 1 OS=Saccharomyces cerevisiae (strain ATCC 204508 / S288c) GN=CDC19 PE=1 SV=2	1	33	33	32	72.6	72.6	70.6	54.544	500	500	0	323.31	0.37254	0.80224	13.723	58	8	Leave out requantified	29100000000	20600000000	8490000000				21	44;56;69;93;103;541;598;599;753;863;864;869;1005;1102;1108;1205;1237;1290;1616;1617;1690;1729;1764;1931;2138;2261;2340;2368;2426;2488;2514;2773;2939	True;True;True;True;True;True;True;True;True;True;True;True;True;True;True;True;True;True;True;True;True;True;True;True;True;True;True;True;True;True;True;True;True	45;46;58;72;99;109;578;635;636;798;910;911;916;1062;1166;1167;1173;1277;1311;1366;1713;1714;1803;1850;1889;1890;2071;2291;2425;2426;2511;2539;2600;2601;2670;2698;2978;3158	59;60;61;62;80;99;100;137;147;805;881;882;883;884;1101;1102;1246;1247;1255;1461;1462;1611;1612;1622;1763;1811;1812;1882;1883;1884;1885;2333;2334;2447;2448;2449;2518;2519;2520;2564;2565;2809;3109;3110;3306;3307;3424;3425;3465;3466;3547;3548;3647;3648;3686;3687;4061;4062;4316;4317	89;90;91;92;93;94;95;96;123;124;153;154;155;210;211;228;1211;1212;1316;1317;1318;1319;1320;1321;1322;1645;1646;1647;1862;1863;1864;1865;1866;1867;1868;1869;1870;1871;1872;1873;1886;1887;2185;2186;2187;2410;2411;2425;2641;2714;2715;2716;2717;2819;2820;2821;2822;3481;3482;3483;3636;3637;3638;3740;3741;3742;3743;3744;3817;3818;3819;4182;4612;4613;4913;4914;4915;5093;5094;5143;5144;5145;5260;5261;526…	95;124;155;211;228;1212;1319;1321;1645;1862;1872;1887;2186;2410;2425;2641;2716;2820;3481;3483;3637;3742;3819;4182;4613;4915;5093;5144;5262;5436;5500;6066;6428		28;29;30;31;32;33;34;35			50;109;126;209;261;300;304;330
sp|P00830|ATPB_YEAST	sp|P00830|ATPB_YEAST	15	15	15	sp|P00830|ATPB_YEAST ATP synthase subunit beta, mitochondrial OS=Saccharomyces cerevisiae (strain ATCC 204508 / S288c) GN=ATP2 PE=1 SV=2	1	15	15	15	42.3	42.3	42.3	54.793	511	511	0	118.35	0.62279	1.1476	18.223	16	2	Leave out requantified	2240000000	1390000000	855000000				22	79;445;575;676;708;1054;1275;1472;1634;2240;2435;2546;2691;2746;2797	True;True;True;True;True;True;True;True;True;True;True;True;True;True;True	85;475;612;715;750;1112;1351;1559;1732;2402;2612;2733;2891;2950;3005	119;664;849;991;992;1037;1534;1865;2137;2355;3273;3564;3735;3937;4026;4097	184;1002;1274;1275;1480;1481;1482;1483;1557;2299;2300;2799;3193;3510;4852;5309;5582;5583;5584;5585;5586;5587;5884;5885;6018;6110;6111	184;1002;1275;1483;1557;2300;2799;3193;3510;4852;5309;5585;5884;6018;6110		36;37			97;426
sp|P00925|ENO2_YEAST;sp|P00924|ENO1_YEAST	sp|P00925|ENO2_YEAST;sp|P00924|ENO1_YEAST	8;4	8;4	8;4	sp|P00925|ENO2_YEAST Enolase 2 OS=Saccharomyces cerevisiae (strain ATCC 204508 / S288c) GN=ENO2 PE=1 SV=2;sp|P00924|ENO1_YEAST Enolase 1 OS=Saccharomyces cerevisiae (strain ATCC 204508 / S288c) GN=ENO1 PE=1 SV=3	2	8	8	8	26.8	26.8	26.8	46.914	437	437;437	0	66.075	0.5158	0.96699	20.328	9	2	Leave out requantified	625000000	356000000	269000000				23	199;868;1002;1027;2164;2201;2362;2733	True;True;True;True;True;True;True;True	214;915;1059;1084;2320;2360;2533;2937	306;1254;1457;1494;3150;3151;3215;3457;4008	465;466;1885;2179;2180;2237;4666;4667;4774;5133;5990	466;1885;2179;2237;4666;4774;5133;5990
sp|P00958|SYMC_YEAST	sp|P00958|SYMC_YEAST	1	1	1	sp|P00958|SYMC_YEAST Methionine--tRNA ligase, cytoplasmic OS=Saccharomyces cerevisiae (strain ATCC 204508 / S288c) GN=MES1 PE=1 SV=4	1	1	1	1	1.9	1.9	1.9	85.677	751	751	0.002725	6.6762	0.45408	0.8299	NaN	1	0	Median	16276000	11096000	5180300				24	236	TRUE	252	360	546	546
sp|P01123|YPT1_YEAST	sp|P01123|YPT1_YEAST	1	1	1	sp|P01123|YPT1_YEAST GTP-binding protein YPT1 OS=Saccharomyces cerevisiae (strain ATCC 204508 / S288c) GN=YPT1 PE=1 SV=2	1	1	1	1	6.8	6.8	6.8	23.214	206	206	0	11.721	0.42053	0.76966	NaN	1	1	Median	15764000	11126000	4638400				25	559	TRUE	596	829	1248	1248		38			173
sp|P02294|H2B2_YEAST;sp|P02293|H2B1_YEAST	sp|P02294|H2B2_YEAST;sp|P02293|H2B1_YEAST	6;6	6;6	6;6	sp|P02294|H2B2_YEAST Histone H2B.2 OS=Saccharomyces cerevisiae (strain ATCC 204508 / S288c) GN=HTB2 PE=1 SV=2;sp|P02293|H2B1_YEAST Histone H2B.1 OS=Saccharomyces cerevisiae (strain ATCC 204508 / S288c) GN=HTB1 PE=1 SV=2	2	6	6	6	40.5	40.5	40.5	14.237	131	131;131	0	45.291	0.43926	0.81942	17.673	7	1	Leave out requantified	592000000	398000000	195000000				26	586;886;1229;1455;2034;2253	True;True;True;True;True;True	623;935;1302;1541;2181;2416;2417	865;1281;1800;2113;2960;3294;3295	1295;1926;1927;1928;1929;1930;2703;3155;3156;4397;4892;4893;4894	1295;1929;2703;3155;4397;4894		39			63
sp|P02309|H4_YEAST	sp|P02309|H4_YEAST	5	5	5	sp|P02309|H4_YEAST Histone H4 OS=Saccharomyces cerevisiae (strain ATCC 204508 / S288c) GN=HHF1 PE=1 SV=2	1	5	5	5	50.5	50.5	50.5	11.368	103	103	0	37.883	0.46067	0.9078	13.14	6	1	Leave out requantified	1440000000	835000000	602000000				27	323;348;1140;2155;2555	True;True;True;True;True	344;372;1208;2309;2744	485;486;523;1669;3131;3748	731;732;783;784;2501;4640;5606;5607	732;784;2501;4640;5606
sp|P02400|RLA4_YEAST	sp|P02400|RLA4_YEAST	5	5	5	sp|P02400|RLA4_YEAST 60S acidic ribosomal protein P2-beta OS=Saccharomyces cerevisiae (strain ATCC 204508 / S288c) GN=RPP2B PE=1 SV=2	1	5	5	5	54.5	54.5	54.5	11.05	110	110	0	54.682	0.4444	0.86201	16.687	9	2	Leave out requantified	3560000000	2440000000	1110000000				28	219;843;844;1105;2901	True;True;True;True;True	235;889;890;1170;3116	340;1214;1215;1216;1217;1616;1617;4266;4267	517;1815;1816;1817;1818;1819;2416;2417;2418;6356;6357;6358	517;1816;1818;2416;6358
sp|P02406|RL28_YEAST	sp|P02406|RL28_YEAST	8	8	8	sp|P02406|RL28_YEAST 60S ribosomal protein L28 OS=Saccharomyces cerevisiae (strain ATCC 204508 / S288c) GN=RPL28 PE=1 SV=3	1	8	8	8	45.6	45.6	45.6	16.721	149	149	0	86.169	0.54632	1.1358	7.366	16	0	Leave out requantified	22600000000	14400000000	8190000000				29	9;569;835;1124;1652;1653;2017;2892	True;True;True;True;True;True;True;True	9;606;881;1190;1750;1751;2164;3106	12;841;842;843;1204;1205;1647;1648;2377;2378;2379;2380;2935;2936;2937;4247;4248	24;1263;1264;1265;1266;1267;1268;1800;1801;1802;1803;2469;2470;2471;2472;2473;3539;3540;3541;3542;3543;3544;3545;3546;4365;4366;4367;4368;4369;6331;6332;6333;6334	24;1266;1802;2471;3541;3545;4369;6332
sp|P14127|RS17B_YEAST;sp|P02407|RS17A_YEAST	sp|P14127|RS17B_YEAST;sp|P02407|RS17A_YEAST	10;10	10;10	10;10	sp|P14127|RS17B_YEAST 40S ribosomal protein S17-B OS=Saccharomyces cerevisiae (strain ATCC 204508 / S288c) GN=RPS17B PE=1 SV=1;sp|P02407|RS17A_YEAST 40S ribosomal protein S17-A OS=Saccharomyces cerevisiae (strain ATCC 204508 / S288c) GN=RPS17A PE=1 SV=1	2	10	10	10	60.3	60.3	60.3	15.803	136	136;136	0	107.87	0.51514	1.1096	11.885	16	0	Leave out requantified	16400000000	10700000000	5710000000				30	332;966;1220;1358;1541;1550;1610;1611;2063;2259	True;True;True;True;True;True;True;True;True;True	355;1020;1021;1292;1436;1634;1644;1705;1706;2212;2423	499;1405;1406;1407;1786;1787;1975;1976;2229;2230;2245;2320;2321;2322;2323;3000;3001;3304	749;750;2111;2112;2113;2114;2115;2684;2685;2686;2687;2947;2948;2949;2950;3328;3329;3330;3356;3460;3461;3462;3463;3464;3465;3466;4453;4454;4455;4909;4910	750;2113;2687;2948;3328;3356;3462;3464;4453;4909		40			58
sp|P02557|TBB_YEAST	sp|P02557|TBB_YEAST	3	3	3	sp|P02557|TBB_YEAST Tubulin beta chain OS=Saccharomyces cerevisiae (strain ATCC 204508 / S288c) GN=TUB2 PE=1 SV=2	1	3	3	3	9.4	9.4	9.4	50.922	457	457	0	18.073	0.43594	0.7607	10.92	3	1	Median	56129000	40900000	15229000				31	589;1531;2931	True;True;True	626;1622;3150	869;2214;4306	1300;3306;6411	1300;3306;6411		41			330
sp|P02994|EF1A_YEAST	sp|P02994|EF1A_YEAST	18	18	18	sp|P02994|EF1A_YEAST Elongation factor 1-alpha OS=Saccharomyces cerevisiae (strain ATCC 204508 / S288c) GN=TEF1 PE=1 SV=1	1	18	18	18	48.7	48.7	48.7	50.032	458	458	0	202.9	0.3557	0.72131	16.51	36	5	Leave out requantified	15000000000	10800000000	4200000000				32	451;581;629;718;828;1259;1540;1995;2039;2057;2162;2173;2335;2472;2553;2621;2858;2937	True;True;True;True;True;True;True;True;True;True;True;True;True;True;True;True;True;True	481;618;667;760;761;874;1334;1633;2141;2187;2206;2318;2330;2505;2506;2651;2741;2742;2813;2814;3071;3156	670;671;858;859;927;1047;1048;1196;1839;2228;2901;2902;2966;2967;2992;3146;3147;3163;3164;3165;3415;3416;3417;3418;3419;3617;3618;3745;3746;3837;3838;3839;3840;4198;4199;4313;4314	1009;1010;1011;1286;1287;1384;1385;1572;1573;1574;1575;1576;1577;1787;2762;2763;2764;2765;3327;4318;4319;4403;4404;4405;4438;4439;4440;4441;4442;4658;4659;4660;4661;4691;4692;4693;4694;5080;5081;5082;5083;5084;5085;5086;5387;5388;5389;5390;5391;5392;5393;5394;5395;5602;5603;5604;5740;5741;5742;5743;5744;5745;6262;6263;6264;6421;6422;6423;6424	1011;1287;1384;1575;1787;2764;3327;4319;4405;4442;4658;4691;5083;5393;5602;5745;6262;6423		42;43;44;45			199;274;292;408
sp|P03871|REP1_YEAST	sp|P03871|REP1_YEAST	1	1	1	sp|P03871|REP1_YEAST Partitioning protein REP1 OS=Saccharomyces cerevisiae (strain ATCC 204508 / S288c) GN=REP1 PE=1 SV=1	1	1	1	1	2.7	2.7	2.7	43.231	373	373	0.002717	6.6465	0.45379	0.80584	NaN	1	0	Median	43600000	32050000	11551000				33	511	TRUE	542	752	1143	1143
sp|P03872|REP2_YEAST	sp|P03872|REP2_YEAST	2	2	2	sp|P03872|REP2_YEAST Partitioning protein REP2 OS=Saccharomyces cerevisiae (strain ATCC 204508 / S288c) GN=REP2 PE=1 SV=1	1	2	2	2	10.5	10.5	10.5	33.196	296	296	0	11.448	0.62013	1.1477	10.795	2	0	Median	12286000	7026500	5259700				34	1644;1939	True;True	1742;2079	2367;2819	3526;3527;4195	3526;4195
sp|P04050|RPB1_YEAST	sp|P04050|RPB1_YEAST	1	1	1	sp|P04050|RPB1_YEAST DNA-directed RNA polymerase II subunit RPB1 OS=Saccharomyces cerevisiae (strain ATCC 204508 / S288c) GN=RPO21 PE=1 SV=2	1	1	1	1	0.7	0.7	0.7	191.61	1733	1733	0.00295	8.2291	0.85833	1.56	NaN	1	1	Median	25518000	13995000	11523000				35	2712	TRUE	2913	3970	5932	5932
sp|P04147|PABP_YEAST	sp|P04147|PABP_YEAST	16	16	16	sp|P04147|PABP_YEAST Polyadenylate-binding protein, cytoplasmic and nuclear OS=Saccharomyces cerevisiae (strain ATCC 204508 / S288c) GN=PAB1 PE=1 SV=4	1	16	16	16	37.1	37.1	37.1	64.343	577	577	0	142.32	0.51135	0.9659	25.134	17	6	Leave out requantified	2190000000	1410000000	785000000				36	89;201;388;400;544;652;763;1148;1721;1792;1796;1839;1840;1944;2276;2935	True;True;True;True;True;True;True;True;True;True;True;True;True;True;True;True	95;216;414;426;581;691;808;1217;1842;1920;1924;1974;1975;2084;2443;3154	133;308;584;598;808;961;1117;1684;2508;2509;2609;2613;2683;2684;2685;2826;3330;4311	206;468;469;872;891;1216;1434;1668;2524;3728;3729;3877;3881;4005;4006;4007;4211;4957;6419	206;468;872;891;1216;1434;1668;2524;3728;3877;3881;4005;4006;4211;4957;6419		46;47			189;533
sp|P04449|RL24A_YEAST	sp|P04449|RL24A_YEAST	7	1	1	sp|P04449|RL24A_YEAST 60S ribosomal protein L24-A OS=Saccharomyces cerevisiae (strain ATCC 204508 / S288c) GN=RPL24A PE=1 SV=1	1	7	1	1	32.3	7.7	7.7	17.613	155	155	0.007653	6.0437	0.46779	0.85265	5.579	3	2	Median	545000000	372000000	172000000				37	168;793;982;1242;1678;1916;2224	False;False;False;False;True;False;False	183;838;1038;1316;1784;1785;2053;2383	266;267;1151;1152;1427;1819;2420;2421;2422;2788;3249	402;403;404;1718;1719;1720;2137;2138;2726;3601;3602;3603;4154;4155;4820	402;1719;2137;2726;3602;4154;4820		48			1
sp|P04456|RL25_YEAST	sp|P04456|RL25_YEAST	5	5	5	sp|P04456|RL25_YEAST 60S ribosomal protein L25 OS=Saccharomyces cerevisiae (strain ATCC 204508 / S288c) GN=RPL25 PE=1 SV=4	1	5	5	5	43	43	43	15.757	142	142	0	58.2	0.36745	0.83119	30.127	9	0	Leave out requantified	6300000000	4520000000	1780000000				38	528;1296;1604;2668;2734	True;True;True;True;True	562;1373;1698;2863;2864;2938	780;781;1894;2312;2313;3904;3905;4009;4010	1176;1177;1178;1179;2833;3450;3451;3452;5839;5840;5841;5842;5991;5992;5993;5994	1179;2833;3451;5841;5993		49;50			73;88
sp|P04650|RL39_YEAST	sp|P04650|RL39_YEAST	2	2	2	sp|P04650|RL39_YEAST 60S ribosomal protein L39 OS=Saccharomyces cerevisiae (strain ATCC 204508 / S288c) GN=RPL39 PE=1 SV=3	1	2	2	2	19.6	19.6	19.6	6.3415	51	51	0	15.864	0.5138	1.1922	25.606	3	0	Median	3240000000	2070000000	1180000000				39	1922;2007	True;True	2059;2154	2796;2922;2923	4166;4346;4347;4348	4166;4346
sp|P04710|ADT1_YEAST	sp|P04710|ADT1_YEAST	3	2	2	sp|P04710|ADT1_YEAST ADP,ATP carrier protein 1 OS=Saccharomyces cerevisiae (strain ATCC 204508 / S288c) GN=AAC1 PE=1 SV=1	1	3	2	2	7.4	3.6	3.6	34.12	309	309	0	11.753	0.27536	0.5443	20.442	2	0	Median	132000000	101000000	30701000				40	1967;1968;2875	True;True;False	2111;2112;3089	2862;2863;4223	4263;4264;6298;6299	4263;4264;6298
sp|P04802|SYDC_YEAST	sp|P04802|SYDC_YEAST	1	1	1	sp|P04802|SYDC_YEAST Aspartate--tRNA ligase, cytoplasmic OS=Saccharomyces cerevisiae (strain ATCC 204508 / S288c) GN=DPS1 PE=1 SV=3	1	1	1	1	3.6	3.6	3.6	63.515	557	557	1	-2	NaN	NaN	NaN	0	0	Median	0	0	0	#ERROR!			41	1195	TRUE	1267	1751	2626	2626			23			196
sp|P04840|VDAC1_YEAST	sp|P04840|VDAC1_YEAST	6	6	6	sp|P04840|VDAC1_YEAST Mitochondrial outer membrane protein porin 1 OS=Saccharomyces cerevisiae (strain ATCC 204508 / S288c) GN=POR1 PE=1 SV=4	1	6	6	6	25.1	25.1	25.1	30.428	283	283	0	49.408	0.51626	0.98968	38.384	5	1	Leave out requantified	438000000	283000000	155000000				42	283;1543;1741;1777;2110;2907	True;True;True;True;True;True	301;1637;1863;1903;2261;3122	428;2235;2535;2585;3066;4275	649;650;3338;3767;3851;4546;6368	649;3338;3767;3851;4546;6368
sp|P04911|H2A1_YEAST;sp|P04912|H2A2_YEAST;sp|Q12692|H2AZ_YEAST	sp|P04911|H2A1_YEAST;sp|P04912|H2A2_YEAST	3;3;1	3;3;1	3;3;1	sp|P04911|H2A1_YEAST Histone H2A.1 OS=Saccharomyces cerevisiae (strain ATCC 204508 / S288c) GN=HTA1 PE=1 SV=2;sp|P04912|H2A2_YEAST Histone H2A.2 OS=Saccharomyces cerevisiae (strain ATCC 204508 / S288c) GN=HTA2 PE=1 SV=2	3	3	3	3	28	28	28	13.989	132	132;132;134	0	23.805	0.4405	0.83114	9.589	3	0	Leave out requantified	672000000	457000000	214000000				43	929;1483;1730	True;True;True	982;1571;1851	1354;2151;2521	2048;3213;3214;3745;3746	2048;3213;3745
sp|P05030|PMA1_YEAST;sp|P19657|PMA2_YEAST	sp|P05030|PMA1_YEAST;sp|P19657|PMA2_YEAST	17;12	17;12	17;12	sp|P05030|PMA1_YEAST Plasma membrane ATPase 1 OS=Saccharomyces cerevisiae (strain ATCC 204508 / S288c) GN=PMA1 PE=1 SV=2;sp|P19657|PMA2_YEAST Plasma membrane ATPase 2 OS=Saccharomyces cerevisiae (strain ATCC 204508 / S288c) GN=PMA2 PE=1 SV=3	2	17	17	17	23.9	23.9	23.9	99.618	918	918;947	0	158.08	0.40042	0.79487	20.222	18	6	Leave out requantified	3650000000	2020000000	1620000000				44	28;284;955;1196;1281;1311;1419;1573;1687;2334;2451;2542;2694;2765;2770;2801;2887	True;True;True;True;True;True;True;True;True;True;True;True;True;True;True;True;True	29;302;1009;1268;1357;1388;1500;1667;1800;2504;2630;2729;2895;2970;2975;3009;3101	38;429;1390;1752;1871;1913;2063;2271;2444;3414;3588;3729;3730;3941;3942;4053;4058;4101;4242	59;651;2093;2627;2808;2858;3090;3091;3387;3633;5079;5345;5346;5575;5576;5891;5892;5893;6054;6060;6117;6325;6326	59;651;2093;2627;2808;2858;3091;3387;3633;5079;5346;5576;5893;6054;6060;6117;6325		51;52;53;54;55			105;556;592;904;907
sp|P05085|ARGR2_YEAST	sp|P05085|ARGR2_YEAST	17	17	17	sp|P05085|ARGR2_YEAST Arginine metabolism regulation protein II OS=Saccharomyces cerevisiae (strain ATCC 204508 / S288c) GN=ARG81 PE=1 SV=3	1	17	17	17	25.5	25.5	25.5	100.28	880	880	0	119.87	0.96121	1.8332	27.874	18	5	Leave out requantified	1570000000	763000000	807000000				45	393;480;667;938;1034;1169;1235;1462;1704;1720;1853;2149;2227;2233;2252;2412;2606	True;True;True;True;True;True;True;True;True;True;True;True;True;True;True;True;True	419;511;706;991;1092;1240;1308;1548;1822;1841;1989;2303;2386;2392;2415;2584;2797	590;709;979;1364;1505;1714;1807;1808;2122;2473;2506;2507;2701;3124;3252;3259;3293;3526;3816	881;1076;1077;1462;1463;2061;2255;2566;2567;2710;2711;3171;3670;3726;3727;4033;4628;4823;4824;4833;4891;5228;5709;5710	881;1077;1462;2061;2255;2566;2710;3171;3670;3727;4033;4628;4823;4833;4891;5228;5709		56;57			364;408
sp|P05317|RLA0_YEAST	sp|P05317|RLA0_YEAST	10	10	10	sp|P05317|RLA0_YEAST 60S acidic ribosomal protein P0 OS=Saccharomyces cerevisiae (strain ATCC 204508 / S288c) GN=RPP0 PE=1 SV=2	1	10	10	10	32.4	32.4	32.4	33.717	312	312	0	83.553	0.35856	0.72715	11.627	16	5	Leave out requantified	5280000000	3860000000	1420000000				46	59;212;220;769;829;856;1204;1565;1885;2513	True;True;True;True;True;True;True;True;True;True	61;227;228;236;814;875;902;1276;1659;2021;2697	85;326;327;328;329;341;1123;1197;1233;1234;1762;2261;2262;2741;2742;3684;3685	131;132;493;494;495;496;518;1674;1788;1789;1790;1791;1844;1845;1846;1847;2640;3374;3375;3376;4085;4086;5496;5497;5498;5499	131;495;518;1674;1789;1847;2640;3374;4086;5498		58;59			53;128
sp|P05318|RLA1_YEAST	sp|P05318|RLA1_YEAST	2	2	2	sp|P05318|RLA1_YEAST 60S acidic ribosomal protein P1-alpha OS=Saccharomyces cerevisiae (strain ATCC 204508 / S288c) GN=RPP1A PE=1 SV=4	1	2	2	2	28.3	28.3	28.3	10.908	106	106	0	17.276	0.46956	1.0865	18.672	3	0	Plateau	793000000	524000000	269000000				47	110;1502	True;True	118;1591	160;161;2175	245;246;247;248;3250	247;3250
sp|P05319|RLA2_YEAST	sp|P05319|RLA2_YEAST	3	3	3	sp|P05319|RLA2_YEAST 60S acidic ribosomal protein P2-alpha OS=Saccharomyces cerevisiae (strain ATCC 204508 / S288c) GN=RPP2A PE=1 SV=1	1	3	3	3	39.6	39.6	39.6	10.746	106	106	0	48.588	0.47382	1.0302	13.138	6	1	Leave out requantified	2480000000	1650000000	828000000				48	2333;2764;2900	True;True;True	2503;2969;3115	3412;3413;4051;4052;4264;4265	5076;5077;5078;6052;6053;6353;6354;6355	5078;6052;6354
sp|P05374|CHO2_YEAST	sp|P05374|CHO2_YEAST	2	2	2	sp|P05374|CHO2_YEAST Phosphatidylethanolamine N-methyltransferase OS=Saccharomyces cerevisiae (strain ATCC 204508 / S288c) GN=CHO2 PE=1 SV=1	1	2	2	2	1.8	1.8	1.8	101.2	869	869	0	11.19	0.40848	0.77234	62.101	2	0	Median	107000000	75256000	31574000				49	319;1618	True;True	340;1715	477;2335	716;3484	716;3484
sp|P05375|PLMT_YEAST	sp|P05375|PLMT_YEAST	2	2	2	sp|P05375|PLMT_YEAST Phosphatidyl-N-methylethanolamine N-methyltransferase OS=Saccharomyces cerevisiae (strain ATCC 204508 / S288c) GN=OPI3 PE=1 SV=1	1	2	2	2	10.7	10.7	10.7	23.15	206	206	0	18.015	0.13572	0.24998	5.4037	2	1	Median	25979000	22496000	3483000				50	566;1675	True;True	603;1781	838;2417	1258;3596	1258;3596		60			1
sp|P05694|METE_YEAST	sp|P05694|METE_YEAST	2	2	2	sp|P05694|METE_YEAST 5-methyltetrahydropteroyltriglutamate--homocysteine methyltransferase OS=Saccharomyces cerevisiae (strain ATCC 204508 / S288c) GN=MET6 PE=1 SV=4	1	2	2	2	4.3	4.3	4.3	85.859	767	767	0	15.611	0.51612	0.94517	0.53706	2	0	Median	11584000	7427600	4156200				51	1935;2632	True;True	2075;2827	2814;3859	4187;5774	4187;5774
sp|P05737|RL7A_YEAST;sp|Q12213|RL7B_YEAST	sp|P05737|RL7A_YEAST;sp|Q12213|RL7B_YEAST	15;14	15;14	15;14	sp|P05737|RL7A_YEAST 60S ribosomal protein L7-A OS=Saccharomyces cerevisiae (strain ATCC 204508 / S288c) GN=RPL7A PE=1 SV=3;sp|Q12213|RL7B_YEAST 60S ribosomal protein L7-B OS=Saccharomyces cerevisiae (strain ATCC 204508 / S288c) GN=RPL7B PE=1 SV=3	2	15	15	15	54.5	54.5	54.5	27.638	244	244;244	0	130.23	0.41932	0.88163	11.581	23	7	Leave out requantified	12400000000	8600000000	3800000000				52	11;194;607;897;898;1095;1096;1115;1308;1449;1590;1945;2023;2360;2739	True;True;True;True;True;True;True;True;True;True;True;True;True;True;True	11;209;645;947;948;1156;1157;1180;1385;1535;1684;2085;2170;2531;2943	15;16;300;895;896;1299;1300;1301;1595;1596;1597;1633;1634;1908;2106;2292;2827;2944;2945;3453;3454;4016;4017	28;29;454;1339;1340;1341;1342;1960;1961;1962;1963;1964;2382;2383;2384;2385;2386;2438;2439;2852;3145;3146;3417;3418;4212;4213;4214;4378;4379;5127;5128;5129;6003;6004;6005;6006	29;454;1339;1960;1964;2383;2385;2439;2852;3145;3417;4212;4379;5129;6003
sp|P05738|RL9A_YEAST	sp|P05738|RL9A_YEAST	11	11	3	sp|P05738|RL9A_YEAST 60S ribosomal protein L9-A OS=Saccharomyces cerevisiae (strain ATCC 204508 / S288c) GN=RPL9A PE=1 SV=2	1	11	11	3	52.9	52.9	17.8	21.569	191	191	0	111.03	0.37035	0.8017	13.953	15	2	Leave out requantified	7780000000	5600000000	2190000000				53	662;765;919;1234;1250;1748;2246;2585;2729;2896;2971	True;True;True;True;True;True;True;True;True;True;True	701;810;971;1307;1325;1871;2408;2409;2775;2933;3110;3193	973;974;1119;1336;1805;1806;1830;2544;3283;3284;3785;4000;4001;4254;4255;4373;4374	1454;1455;1456;1670;2025;2026;2708;2709;2743;3782;4871;4872;4873;4874;5659;5660;5661;5662;5663;5664;5979;5980;5981;6342;6343;6509;6510;6511	1456;1670;2026;2709;2743;3782;4874;5661;5979;6342;6510		61			78
sp|P05739|RL6B_YEAST	sp|P05739|RL6B_YEAST	10	10	5	sp|P05739|RL6B_YEAST 60S ribosomal protein L6-B OS=Saccharomyces cerevisiae (strain ATCC 204508 / S288c) GN=RPL6B PE=1 SV=4	1	10	10	5	55.7	55.7	28.4	19.986	176	176	0	79.025	0.40375	0.82375	10.218	15	2	Leave out requantified	6020000000	4220000000	1790000000				54	123;184;397;688;926;2049;2372;2726;2848;2963	True;True;True;True;True;True;True;True;True;True	133;199;423;729;979;2198;2543;2930;3061;3182	183;184;185;287;594;1009;1010;1349;1350;1351;2983;3471;3996;4181;4351;4352	279;280;281;282;283;429;430;431;432;885;886;1507;1508;1509;2042;2043;2044;2045;4426;4427;5150;5151;5973;5974;6233;6234;6478;6479;6480;6481	282;429;886;1509;2044;4426;5150;5973;6234;6480
sp|P05740|RL17A_YEAST	sp|P05740|RL17A_YEAST	10	1	1	sp|P05740|RL17A_YEAST 60S ribosomal protein L17-A OS=Saccharomyces cerevisiae (strain ATCC 204508 / S288c) GN=RPL17A PE=1 SV=4	1	10	1	1	50.5	5.4	5.4	20.549	184	184	0.002924	7.764	0.47859	1.1488	NaN	1	0	Median	796000000	525000000	271000000				55	570;687;719;1109;1110;1658;2871;2872;2878;2904	False;False;False;False;False;False;False;False;False;True	607;728;762;1174;1175;1756;3085;3086;3092;3119	844;1007;1008;1049;1050;1623;1624;1625;1626;2386;2387;4216;4217;4218;4228;4229;4271;4272	1269;1503;1504;1505;1506;1578;1579;1580;1581;2426;2427;2428;2429;3555;3556;3557;3558;6289;6290;6291;6292;6306;6307;6308;6309;6363;6364;6365	1269;1504;1579;2426;2428;3558;6289;6291;6309;6363
sp|P05744|RL33A_YEAST	sp|P05744|RL33A_YEAST	4	4	1	sp|P05744|RL33A_YEAST 60S ribosomal protein L33-A OS=Saccharomyces cerevisiae (strain ATCC 204508 / S288c) GN=RPL33A PE=1 SV=3	1	4	4	1	40.2	40.2	15	12.154	107	107	0	37.202	0.39365	0.77579	10.294	4	0	Leave out requantified	2920000000	2090000000	827000000				56	1003;1013;2430;2728	True;True;True;True	1060;1070;2605;2932	1458;1474;3554;3998;3999	2181;2182;2205;2206;5270;5271;5272;5273;5274;5275;5276;5277;5278;5279;5280;5976;5977;5978	2182;2205;5275;5978
sp|P05745|RL36A_YEAST	sp|P05745|RL36A_YEAST	6	1	1	sp|P05745|RL36A_YEAST 60S ribosomal protein L36-A OS=Saccharomyces cerevisiae (strain ATCC 204508 / S288c) GN=RPL36A PE=1 SV=3	1	6	1	1	49	9	9	11.124	100	100	0.007389	5.8686	1.1339	2.0854	NaN	1	1	Median	13552000	5622200	7929600				57	106;460;2066;2415;2609;2788	False;False;False;False;False;True	112;113;490;2215;2587;2800;2995	150;151;152;683;684;3004;3530;3531;3820;4085	231;232;233;234;1029;1030;1031;4458;5235;5236;5716;5717;5718;6095	234;1031;4458;5235;5716;6095		16;62			20;90
sp|P05748|RL15A_YEAST;sp|P54780|RL15B_YEAST	sp|P05748|RL15A_YEAST;sp|P54780|RL15B_YEAST	7;5	7;5	7;5	sp|P05748|RL15A_YEAST 60S ribosomal protein L15-A OS=Saccharomyces cerevisiae (strain ATCC 204508 / S288c) GN=RPL15A PE=1 SV=3;sp|P54780|RL15B_YEAST 60S ribosomal protein L15-B OS=Saccharomyces cerevisiae (strain ATCC 204508 / S288c) GN=RPL15B PE=1 SV=2	2	7	7	7	36.3	36.3	36.3	24.422	204	204;204	0	85.193	0.36374	0.68019	29.647	9	4	Leave out requantified	2900000000	1630000000	1270000000				58	745;814;2010;2707;2873;2903;2929	True;True;True;True;True;True;True	790;860;2157;2908;3087;3118;3147	1089;1090;1179;2926;3962;4219;4220;4270;4303	1630;1631;1632;1757;1758;1759;4351;5920;5921;6293;6294;6362;6407	1631;1759;4351;5920;6294;6362;6407
sp|P05749|RL22A_YEAST	sp|P05749|RL22A_YEAST	3	3	3	sp|P05749|RL22A_YEAST 60S ribosomal protein L22-A OS=Saccharomyces cerevisiae (strain ATCC 204508 / S288c) GN=RPL22A PE=1 SV=3	1	3	3	3	55.4	55.4	55.4	13.693	121	121	0	50.022	0.44701	0.88614	8.7939	2	0	Median	136000000	91182000	44551000				59	1337;2413;2612	True;True;True	1414;2585;2803	1948;3527;3824	2906;5229;5724	2906;5229;5724
sp|P05750|RS3_YEAST	sp|P05750|RS3_YEAST	17	17	17	sp|P05750|RS3_YEAST 40S ribosomal protein S3 OS=Saccharomyces cerevisiae (strain ATCC 204508 / S288c) GN=RPS3 PE=1 SV=5	1	17	17	17	73.3	73.3	73.3	26.502	240	240	0	192.19	0.30638	0.6464	10.879	32	5	Leave out requantified	15000000000	11200000000	3840000000				60	20;128;372;421;494;617;749;812;1101;1106;1492;1620;2061;2502;2503;2855;2966	True;True;True;True;True;True;True;True;True;True;True;True;True;True;True;True;True	20;138;396;449;525;655;794;857;858;1164;1165;1171;1580;1717;2210;2685;2686;3068;3186;3187	26;191;192;554;630;631;730;910;911;1094;1095;1175;1176;1177;1609;1610;1618;1619;1620;2160;2337;2338;2998;3666;3667;3668;4191;4192;4359;4360;4361;4362;4363	42;292;293;294;295;829;830;946;947;948;949;1115;1116;1360;1361;1362;1363;1637;1638;1751;1752;1753;1754;1755;2402;2403;2404;2405;2406;2407;2408;2409;2419;2420;2421;2422;2423;3228;3486;3487;3488;4448;4449;5464;5465;5466;5467;6246;6247;6488;6489;6490;6491;6492;6493;6494	42;295;829;949;1115;1363;1638;1755;2405;2421;3228;3486;4448;5464;5465;6247;6493		63;64;65			105;127;189
sp|P05755|RS9B_YEAST;sp|O13516|RS9A_YEAST	sp|P05755|RS9B_YEAST;sp|O13516|RS9A_YEAST	15;14	15;14	15;14	sp|P05755|RS9B_YEAST 40S ribosomal protein S9-B OS=Saccharomyces cerevisiae (strain ATCC 204508 / S288c) GN=RPS9B PE=1 SV=4;sp|O13516|RS9A_YEAST 40S ribosomal protein S9-A OS=Saccharomyces cerevisiae (strain ATCC 204508 / S288c) GN=RPS9A PE=1 SV=3	2	15	15	15	55.4	55.4	55.4	22.298	195	195;197	0	116.75	0.43035	0.89299	16.929	20	3	Leave out requantified	9250000000	6430000000	2820000000				61	917;918;1139;1200;1258;1338;1373;1389;1559;1987;2068;2076;2607;2655;2656	True;True;True;True;True;True;True;True;True;True;True;True;True;True;True	969;970;1207;1272;1333;1415;1451;1468;1653;2132;2133;2217;2225;2798;2850;2851	1333;1334;1335;1666;1667;1668;1757;1838;1949;1995;2021;2254;2255;2889;2890;3007;3017;3018;3817;3818;3888;3889	2021;2022;2023;2024;2497;2498;2499;2500;2634;2760;2761;2907;2908;2981;3022;3367;3368;4298;4299;4300;4463;4473;4474;4475;5711;5712;5713;5714;5813;5814;5815;5816	2023;2024;2497;2634;2760;2907;2981;3022;3368;4300;4463;4473;5711;5813;5815		66			147
sp|P05756|RS13_YEAST	sp|P05756|RS13_YEAST	8	8	8	sp|P05756|RS13_YEAST 40S ribosomal protein S13 OS=Saccharomyces cerevisiae (strain ATCC 204508 / S288c) GN=RPS13 PE=1 SV=3	1	8	8	8	57.6	57.6	57.6	17.029	151	151	0	60.801	0.39049	0.81676	4.1571	12	4	Leave out requantified	7610000000	5350000000	2260000000				62	792;815;1454;1596;1723;2258;2539;2870	True;True;True;True;True;True;True;True	837;861;1540;1690;1844;2422;2726;3084	1150;1180;1181;2111;2112;2299;2300;2511;2512;3301;3302;3303;3724;3725;3726;4214;4215	1717;1760;1761;1762;1763;3152;3153;3154;3429;3430;3431;3432;3731;3732;3733;3734;4902;4903;4904;4905;4906;4907;4908;5558;5559;5560;6287;6288	1717;1760;3152;3430;3731;4907;5559;6287
sp|P05759|RS27A_YEAST	sp|P05759|RS27A_YEAST	6	6	3	sp|P05759|RS27A_YEAST Ubiquitin-40S ribosomal protein S31 OS=Saccharomyces cerevisiae (strain ATCC 204508 / S288c) GN=RPS31 PE=1 SV=3	1	6	6	3	36.8	36.8	17.1	17.216	152	152	0	46.098	0.35512	0.67044	21.639	5	0	Leave out requantified	1730000000	1270000000	463000000				63	409;565;1357;1450;2053;2476	True;True;True;True;True;True	436;602;1435;1536;2202;2655	611;837;1974;2107;2988;3623	911;1257;2945;2946;3147;4433;5401;5402	911;1257;2946;3147;4433;5401	0			48
sp|P06101|CDC37_YEAST	sp|P06101|CDC37_YEAST	1	1	1	sp|P06101|CDC37_YEAST Hsp90 co-chaperone Cdc37 OS=Saccharomyces cerevisiae (strain ATCC 204508 / S288c) GN=CDC37 PE=1 SV=2	1	1	1	1	1.6	1.6	1.6	58.384	506	506	1	-2	23.858	43.908	NaN	1	1	Median	28798000	558570	28239000	#ERROR!			64	1694	TRUE	1808	2454	3644	3644		67;68			415;420
sp|P06106|CYSD_YEAST	sp|P06106|CYSD_YEAST	17	17	17	sp|P06106|CYSD_YEAST Homocysteine/cysteine synthase OS=Saccharomyces cerevisiae (strain ATCC 204508 / S288c) GN=MET17 PE=1 SV=3	1	17	17	17	51.1	51.1	51.1	48.671	444	444	0	150.55	0.70368	1.4595	27.215	21	2	Leave out requantified	7100000000	4090000000	3010000000				65	214;222;315;695;712;903;908;909;1159;1347;1578;1928;2480;2837;2877;2913;2928	True;True;True;True;True;True;True;True;True;True;True;True;True;True;True;True;True	230;238;336;736;754;954;960;961;1230;1425;1672;2068;2659;3049;3091;3129;3146	331;344;472;1019;1041;1310;1318;1319;1320;1703;1962;2278;2805;2806;3628;3629;4161;4226;4227;4282;4302	500;522;523;707;708;1529;1530;1561;1562;1977;1978;1979;1988;1989;1990;1991;2554;2555;2930;2931;3396;4176;4177;4178;5410;5411;5412;6206;6302;6303;6304;6305;6377;6378;6405;6406	500;523;708;1530;1561;1978;1988;1989;2555;2930;3396;4177;5412;6206;6304;6377;6405
sp|P06169|PDC1_YEAST;sp|P16467|PDC5_YEAST;sp|Q07471|THI3_YEAST	sp|P06169|PDC1_YEAST	14;3;1	14;3;1	12;1;0	sp|P06169|PDC1_YEAST Pyruvate decarboxylase isozyme 1 OS=Saccharomyces cerevisiae (strain ATCC 204508 / S288c) GN=PDC1 PE=1 SV=7	3	14	14	12	40	40	33.4	61.495	563	563;563;609	0	144.16	0.44658	0.84466	14.467	23	10	Leave out requantified	2080000000	1380000000	709000000				66	170;1191;1443;1498;1504;1603;1672;1726;1832;1996;2493;2536;2582;2832	True;True;True;True;True;True;True;True;True;True;True;True;True;True	185;1263;1527;1528;1586;1587;1593;1697;1777;1778;1847;1967;2142;2675;2722;2772;3044	269;1747;2095;2096;2097;2098;2169;2170;2171;2178;2310;2311;2411;2412;2413;2515;2675;2903;3654;3655;3718;3782;4154	406;407;2621;3132;3133;3134;3135;3136;3241;3242;3243;3244;3253;3254;3448;3449;3589;3590;3591;3737;3993;3994;4320;5446;5447;5548;5656;6198	407;2621;3135;3243;3253;3449;3589;3737;3993;4320;5446;5548;5656;6198		69;70;71;72;73			187;247;326;535;539
sp|P06197|PIS_YEAST	sp|P06197|PIS_YEAST	1	1	1	sp|P06197|PIS_YEAST CDP-diacylglycerol--inositol 3-phosphatidyltransferase OS=Saccharomyces cerevisiae (strain ATCC 204508 / S288c) GN=PIS1 PE=1 SV=1	1	1	1	1	5.9	5.9	5.9	24.823	220	220	0.002786	6.8813	0.27433	0.54255	NaN	1	0	Median	75209000	54507000	20702000				67	2767	TRUE	2972	4055	6056	6056
sp|P06367|RS14A_YEAST;sp|P39516|RS14B_YEAST	sp|P06367|RS14A_YEAST;sp|P39516|RS14B_YEAST	11;10	11;10	11;10	sp|P06367|RS14A_YEAST 40S ribosomal protein S14-A OS=Saccharomyces cerevisiae (strain ATCC 204508 / S288c) GN=RPS14A PE=1 SV=5;sp|P39516|RS14B_YEAST 40S ribosomal protein S14-B OS=Saccharomyces cerevisiae (strain ATCC 204508 / S288c) GN=RPS14B PE=1 SV=2	2	11	11	11	69.3	69.3	69.3	14.536	137	137;138	0	123.56	0.32645	0.63283	18.778	19	0	Leave out requantified	9480000000	7150000000	2330000000				68	26;243;271;326;592;1000;1001;1189;2265;2496;2684	True;True;True;True;True;True;True;True;True;True;True	26;27;260;289;348;629;1057;1058;1261;2431;2678;2883;2884	33;34;35;36;372;412;490;872;1454;1455;1456;1744;1745;3315;3316;3658;3659;3927;3928	51;52;53;54;55;56;57;564;565;627;736;737;1303;2174;2175;2176;2177;2178;2615;2616;2617;2618;4929;4930;4931;5451;5452;5453;5454;5455;5871;5872	57;564;627;736;1303;2174;2178;2615;4929;5454;5872		74			61
sp|P06634|DED1_YEAST;sp|P24784|DBP1_YEAST	sp|P06634|DED1_YEAST	25;5	25;5	24;4	sp|P06634|DED1_YEAST ATP-dependent RNA helicase DED1 OS=Saccharomyces cerevisiae (strain ATCC 204508 / S288c) GN=DED1 PE=1 SV=2	2	25	25	24	52.8	52.8	51	65.552	604	604;617	0	255.13	0.52332	1.0094	20.113	40	6	Leave out requantified	8840000000	4710000000	4130000000				69	63;73;260;312;357;496;497;705;747;775;800;923;1141;1515;1660;1681;1820;2036;2160;2414;2421;2653;2716;2918;2951	True;True;True;True;True;True;True;True;True;True;True;True;True;True;True;True;True;True;True;True;True;True;True;True;True	65;78;277;278;332;333;381;527;528;747;792;820;845;975;976;1209;1604;1759;1760;1761;1789;1790;1955;2183;2184;2316;2586;2594;2848;2917;3134;3170	90;110;392;393;468;469;535;536;733;734;1033;1092;1130;1161;1162;1340;1341;1342;1343;1670;2189;2390;2391;2392;2393;2426;2427;2428;2660;2962;2963;3143;3144;3528;3529;3539;3885;3975;3976;4287;4335	139;170;594;595;596;597;598;599;703;704;799;800;801;802;803;804;1120;1121;1550;1635;1683;1731;1732;1733;1734;1735;2030;2031;2032;2033;2034;2035;2502;3269;3563;3564;3565;3566;3567;3609;3610;3611;3612;3974;4399;4400;4654;4655;4656;5230;5231;5232;5233;5234;5247;5248;5807;5808;5940;5941;6383;6454	139;170;598;703;804;1120;1121;1550;1635;1683;1734;2031;2502;3269;3564;3609;3974;4399;4655;5230;5247;5808;5940;6383;6454		75;76;77;78;79;80;81;82;83			183;311;314;329;339;411;421;533;534
sp|P06780|RHO1_YEAST	sp|P06780|RHO1_YEAST	2	2	2	sp|P06780|RHO1_YEAST GTP-binding protein RHO1 OS=Saccharomyces cerevisiae (strain ATCC 204508 / S288c) GN=RHO1 PE=1 SV=3	1	2	2	2	9.6	9.6	9.6	23.152	209	209	0	18.654	0.42944	0.79036	1.9023	2	0	Median	272000000	183000000	89569000				70	1630;2280	True;True	1727;2447	2349;3336;3337	3502;4967;4968	3502;4967
sp|P07143|CY1_YEAST	sp|P07143|CY1_YEAST	1	1	1	sp|P07143|CY1_YEAST Cytochrome c1, heme protein, mitochondrial OS=Saccharomyces cerevisiae (strain ATCC 204508 / S288c) GN=CYT1 PE=1 SV=1	1	1	1	1	4.2	4.2	4.2	34.054	309	309	0.002841	7.0908	0.60186	1.184	NaN	1	0	Median	79515000	50791000	28723000				71	2479	TRUE	2658	3627	5409	5409
sp|P07149|FAS1_YEAST	sp|P07149|FAS1_YEAST	8	8	8	sp|P07149|FAS1_YEAST Fatty acid synthase subunit beta OS=Saccharomyces cerevisiae (strain ATCC 204508 / S288c) GN=FAS1 PE=1 SV=2	1	8	8	8	6.5	6.5	6.5	228.69	2051	2051	0	73.836	0.46835	0.8728	34.599	8	2	Leave out requantified	401000000	270000000	131000000				72	90;113;1161;1923;2241;2556;2665;2727	True;True;True;True;True;True;True;True	96;122;1232;2060;2403;2745;2860;2931	134;169;1705;2797;3274;3749;3900;3997	207;259;260;2557;4167;4853;5608;5833;5975	207;259;2557;4167;4853;5608;5833;5975
sp|P07244|PUR2_YEAST	sp|P07244|PUR2_YEAST	3	3	3	sp|P07244|PUR2_YEAST Bifunctional purine biosynthetic protein ADE5,7 OS=Saccharomyces cerevisiae (strain ATCC 204508 / S288c) GN=ADE5,7 PE=1 SV=1	1	3	3	3	8.1	8.1	8.1	86.067	802	802	0	26.983	0.3447	0.6214	6.7129	3	0	Leave out requantified	97161000	69820000	27341000				73	940;2072;2678	True;True;True	993;2221;2877	1366;3011;3921	2063;4467;5864	2063;4467;5864
sp|P07246|ADH3_YEAST	sp|P07246|ADH3_YEAST	4	2	2	sp|P07246|ADH3_YEAST Alcohol dehydrogenase 3, mitochondrial OS=Saccharomyces cerevisiae (strain ATCC 204508 / S288c) GN=ADH3 PE=1 SV=2	1	4	2	2	12	4.5	4.5	40.369	375	375	0	11.332	0.41403	0.77192	33.809	2	1	Median	83152000	58501000	24651000				74	392;1163;2944;2969	True;True;False;False	418;1234;3163;3191	589;1707;4325;4326;4370;4371	880;2559;6438;6439;6440;6441;6503;6504;6505;6506;6507	880;2559;6440;6503
sp|P07251|ATPA_YEAST	sp|P07251|ATPA_YEAST	20	20	20	sp|P07251|ATPA_YEAST ATP synthase subunit alpha, mitochondrial OS=Saccharomyces cerevisiae (strain ATCC 204508 / S288c) GN=ATP1 PE=1 SV=5	1	20	20	20	43.1	43.1	43.1	58.607	545	545	0	179.46	0.50105	0.95733	19.717	21	2	Leave out requantified	3200000000	2100000000	1100000000				75	166;406;509;513;831;874;883;1395;1998;2006;2081;2260;2329;2338;2376;2419;2629;2652;2688;2793	True;True;True;True;True;True;True;True;True;True;True;True;True;True;True;True;True;True;True;True	181;433;540;544;877;922;932;1474;2144;2153;2230;2424;2498;2499;2509;2547;2592;2824;2847;2888;3001	264;607;750;754;1199;1264;1277;2029;2905;2921;3023;3305;3407;3408;3422;3475;3537;3854;3883;3884;3934;4092	399;905;1141;1145;1146;1794;1899;1900;1919;1920;1921;3031;4322;4323;4345;4492;4911;4912;5069;5070;5071;5072;5091;5155;5156;5244;5245;5765;5805;5806;5880;5881;6103	399;905;1141;1146;1794;1899;1921;3031;4322;4345;4492;4911;5071;5091;5155;5244;5765;5806;5880;6103		84			263
sp|P07253|CBP6_YEAST	sp|P07253|CBP6_YEAST	2	2	2	sp|P07253|CBP6_YEAST Cytochrome B pre-mRNA-processing protein 6 OS=Saccharomyces cerevisiae (strain ATCC 204508 / S288c) GN=CBP6 PE=1 SV=1	1	2	2	2	8.6	8.6	8.6	18.678	162	162	0	13.768	0.37268	0.7048	20.75	2	0	Median	110000000	76057000	33661000				76	1640;2307	True;True	1738;2476	2362;3378	3518;3519;5019	3518;5019
sp|P07259|PYR1_YEAST	sp|P07259|PYR1_YEAST	29	29	29	sp|P07259|PYR1_YEAST Protein URA2 OS=Saccharomyces cerevisiae (strain ATCC 204508 / S288c) GN=URA2 PE=1 SV=5	1	29	29	29	15.8	15.8	15.8	245.04	2214	2214	0	220.55	0.39977	0.76627	20.811	32	6	Leave out requantified	2250000000	1490000000	759000000				77	122;270;341;424;458;470;527;663;920;1081;1111;1146;1149;1167;1241;1422;1488;1607;2357;2390;2443;2500;2626;2700;2723;2741;2757;2769;2810	True;True;True;True;True;True;True;True;True;True;True;True;True;True;True;True;True;True;True;True;True;True;True;True;True;True;True;True;True	132;288;365;452;488;501;561;702;972;1141;1176;1215;1218;1238;1315;1503;1576;1702;2528;2561;2620;2682;2821;2901;2927;2945;2961;2974;3018	182;411;514;634;681;699;779;975;1337;1575;1627;1680;1681;1685;1711;1817;1818;2066;2156;2317;3449;3450;3498;3574;3663;3850;3953;3991;4019;4039;4057;4113	278;626;770;771;953;1027;1060;1061;1175;1457;2027;2351;2430;2518;2519;2525;2563;2724;2725;3094;3223;3457;5123;5124;5187;5323;5324;5459;5760;5908;5964;6009;6035;6058;6059;6135;6136	278;626;770;953;1027;1061;1175;1457;2027;2351;2430;2518;2525;2563;2724;3094;3223;3457;5124;5187;5323;5459;5760;5908;5964;6009;6035;6058;6135		85			1088
sp|P07264|LEUC_YEAST	sp|P07264|LEUC_YEAST	56	56	56	sp|P07264|LEUC_YEAST 3-isopropylmalate dehydratase OS=Saccharomyces cerevisiae (strain ATCC 204508 / S288c) GN=LEU1 PE=1 SV=3	1	56	56	56	69.4	69.4	69.4	85.793	779	779	0	323.31	0.78066	1.6914	14.753	111	5	Leave out requantified	159000000000	88700000000	70800000000				78	70;108;145;216;217;268;378;385;432;453;493;505;631;803;887;888;936;937;1014;1073;1074;1214;1216;1244;1247;1279;1341;1359;1370;1460;1592;1700;1761;1895;1896;1909;1941;1942;1963;2084;2085;2090;2121;2122;2186;2220;2383;2431;2460;2468;2594;2623;2624;2627;2630;2943	True;True;True;True;True;True;True;True;True;True;True;True;True;True;True;True;True;True;True;True;True;True;True;True;True;True;True;True;True;True;True;True;True;True;True;True;True;True;True;True;True;True;True;True;True;True;True;True;True;True;True;True;True;True;True;True	73;74;115;116;159;232;233;286;402;410;411;460;461;483;524;536;669;848;936;937;989;990;1071;1132;1133;1286;1288;1318;1321;1355;1418;1419;1437;1448;1546;1686;1816;1817;1818;1886;2031;2032;2045;2081;2082;2105;2106;2233;2234;2239;2273;2274;2275;2343;2379;2554;2606;2607;2608;2639;2647;2784;2816;2817;2818;2819;2822;2825;3162	101;102;103;104;154;155;156;157;231;232;334;335;336;337;338;408;409;563;564;576;577;578;579;645;646;673;674;728;729;744;929;1165;1166;1282;1283;1284;1285;1362;1363;1475;1476;1477;1560;1561;1562;1563;1564;1776;1779;1780;1821;1824;1869;1952;1953;1954;1955;1977;1978;1991;1992;2119;2120;2294;2295;2464;2465;2466;2467;2468;2469;2561;2761;2762;2763;2779;2821;2822;2823;2856;2857;3026;3027;3028;3029;3030;…	156;157;158;159;160;161;162;163;237;238;239;240;241;242;350;351;352;353;505;506;507;508;509;510;511;512;513;514;515;620;621;622;623;624;844;845;846;847;859;860;861;862;863;968;969;970;971;1013;1014;1015;1016;1017;1111;1112;1113;1114;1133;1134;1387;1739;1740;1741;1931;1932;1933;1934;1935;1936;1937;1938;1939;1940;2058;2059;2060;2207;2208;2209;2210;2327;2328;2329;2330;2331;2332;2333;2334;2335;2336;2…	162;242;352;510;513;624;845;859;968;1015;1111;1134;1387;1740;1933;1938;2058;2060;2209;2330;2336;2663;2667;2732;2736;2805;2914;2952;2971;3168;3424;3659;3811;4116;4119;4139;4200;4201;4257;4499;4501;4506;4571;4575;4730;4812;5169;5302;5363;5380;5685;5752;5756;5761;5769;6436		86;87;88;89;90;91;92;93;94;95;96	1;2;24		113;230;232;235;245;339;388;427;459;463;545	488;494;495
sp|P07281|RS19B_YEAST;sp|P07280|RS19A_YEAST	sp|P07281|RS19B_YEAST;sp|P07280|RS19A_YEAST	12;12	12;12	12;12	sp|P07281|RS19B_YEAST 40S ribosomal protein S19-B OS=Saccharomyces cerevisiae (strain ATCC 204508 / S288c) GN=RPS19B PE=1 SV=2;sp|P07280|RS19A_YEAST 40S ribosomal protein S19-A OS=Saccharomyces cerevisiae (strain ATCC 204508 / S288c) GN=RPS19A PE=1 SV=2	2	12	12	12	66	66	66	15.891	144	144;144	0	116.7	0.65528	1.4568	13.169	21	5	Leave out requantified	21100000000	12500000000	8580000000				79	352;915;916;958;1021;1307;1387;1971;2062;2521;2522;2710	True;True;True;True;True;True;True;True;True;True;True;True	376;967;968;1012;1078;1384;1466;2115;2211;2705;2706;2707;2911	527;528;1328;1329;1330;1331;1332;1393;1394;1486;1487;1907;2018;2019;2868;2999;3697;3698;3699;3700;3966;3967;3968	788;789;790;791;2014;2015;2016;2017;2018;2019;2020;2096;2097;2223;2224;2225;2226;2851;3016;3017;3018;3019;3020;4270;4271;4450;4451;4452;5517;5518;5519;5520;5521;5522;5523;5524;5525;5526;5925;5926;5927;5928;5929	791;2016;2017;2097;2223;2851;3019;4271;4451;5519;5525;5925		97			45
sp|P07283|PMM_YEAST	sp|P07283|PMM_YEAST	15	15	15	sp|P07283|PMM_YEAST Phosphomannomutase OS=Saccharomyces cerevisiae (strain ATCC 204508 / S288c) GN=SEC53 PE=1 SV=1	1	15	15	15	62.6	62.6	62.6	29.063	254	254	0	141.43	0.39848	0.76575	12.813	18	6	Leave out requantified	2990000000	2010000000	984000000				80	232;471;489;495;711;855;1093;1355;1619;1725;2178;2437;2483;2560;2912	True;True;True;True;True;True;True;True;True;True;True;True;True;True;True	248;502;520;526;753;901;1154;1433;1716;1846;2335;2614;2662;2663;2749;3128	356;700;721;731;732;1040;1232;1591;1592;1971;2336;2514;3175;3176;3566;3567;3633;3634;3753;4281	539;540;1062;1102;1117;1118;1119;1560;1843;2376;2377;2941;2942;3485;3736;4712;4713;5312;5313;5314;5417;5418;5419;5616;6375;6376	539;1062;1102;1119;1560;1843;2377;2941;3485;3736;4713;5314;5417;5616;6375		98			219
sp|P07342|ILVB_YEAST	sp|P07342|ILVB_YEAST	7	7	7	sp|P07342|ILVB_YEAST Acetolactate synthase catalytic subunit, mitochondrial OS=Saccharomyces cerevisiae (strain ATCC 204508 / S288c) GN=ILV2 PE=1 SV=1	1	7	7	7	13.1	13.1	13.1	74.936	687	687	0	45.473	0.41254	0.75396	18.273	7	2	Leave out requantified	411000000	276000000	135000000				81	5;158;681;1277;1334;1912;2011	True;True;True;True;True;True;True	5;173;722;1353;1411;2049;2158	7;250;1000;1867;1943;2784;2927	16;17;378;1494;2801;2898;4149;4352	16;378;1494;2801;2898;4149;4352		99;100			286;612
sp|P07560|SEC4_YEAST;sp|Q99260|YPT6_YEAST	sp|P07560|SEC4_YEAST	4;1	4;1	4;1	sp|P07560|SEC4_YEAST Ras-related protein SEC4 OS=Saccharomyces cerevisiae (strain ATCC 204508 / S288c) GN=SEC4 PE=1 SV=1	2	4	4	4	21.4	21.4	21.4	23.505	215	215;215	0	26.974	0.37291	0.68097	12.622	4	1	Leave out requantified	277000000	197000000	79961000				82	507;1083;1554;2820	True;True;True;True	538;1143;1648;3031	746;1577;2249;4131	1136;2353;3361;6162	1136;2353;3361;6162
sp|P07703|RPAC1_YEAST	sp|P07703|RPAC1_YEAST	2	2	2	sp|P07703|RPAC1_YEAST DNA-directed RNA polymerases I and III subunit RPAC1 OS=Saccharomyces cerevisiae (strain ATCC 204508 / S288c) GN=RPC40 PE=1 SV=1	1	2	2	2	8.4	8.4	8.4	37.686	335	335	0	13.643	0.43887	0.80139	34.819	2	1	Median	45798000	27183000	18614000				83	395;1566	True;True	421;1660	592;2263	883;3377	883;3377
sp|P08067|UCRI_YEAST	sp|P08067|UCRI_YEAST	1	1	1	sp|P08067|UCRI_YEAST Cytochrome b-c1 complex subunit Rieske, mitochondrial OS=Saccharomyces cerevisiae (strain ATCC 204508 / S288c) GN=RIP1 PE=1 SV=1	1	1	1	1	9.8	9.8	9.8	23.365	215	215	1	-2	0.35731	0.63344	NaN	1	0	Median	2459800	1601700	858050	#ERROR!			84	2331	TRUE	2501	3410	5074	5074		101			91
sp|P08456|PSS_YEAST	sp|P08456|PSS_YEAST	1	1	1	sp|P08456|PSS_YEAST CDP-diacylglycerol--serine O-phosphatidyltransferase OS=Saccharomyces cerevisiae (strain ATCC 204508 / S288c) GN=CHO1 PE=1 SV=3	1	1	1	1	3.6	3.6	3.6	30.804	276	276	0.007299	5.7763	0.38861	0.73411	NaN	1	1	Median	150000000	104000000	45915000				85	689	TRUE	730	1011	1510	1510
sp|P08518|RPB2_YEAST	sp|P08518|RPB2_YEAST	12	12	12	sp|P08518|RPB2_YEAST DNA-directed RNA polymerase II subunit RPB2 OS=Saccharomyces cerevisiae (strain ATCC 204508 / S288c) GN=RPB2 PE=1 SV=2	1	12	12	12	13.2	13.2	13.2	138.75	1224	1224	0	85.794	0.57663	1.127	32.595	12	1	Leave out requantified	694000000	427000000	268000000				86	76;434;568;659;989;1366;1877;1954;1994;2530;2565;2637	True;True;True;True;True;True;True;True;True;True;True;True	82;463;605;698;1045;1444;2013;2094;2140;2716;2754;2832	115;648;840;969;1438;1987;2733;2840;2900;3711;3760;3866	177;973;1261;1262;1448;1449;2152;2153;2967;4077;4232;4233;4317;5538;5624;5784	177;973;1262;1448;2152;2967;4077;4233;4317;5538;5624;5784		102			773
sp|P08536|MET3_YEAST	sp|P08536|MET3_YEAST	1	1	1	sp|P08536|MET3_YEAST Sulfate adenylyltransferase OS=Saccharomyces cerevisiae (strain ATCC 204508 / S288c) GN=MET3 PE=1 SV=2	1	1	1	1	4.7	4.7	4.7	57.724	511	511	0.002747	6.7767	0.30421	0.56385	NaN	1	1	Median	8890300	6997900	1892500				87	967	TRUE	1022	1408	2116	2116
sp|P09064|IF2B_YEAST	sp|P09064|IF2B_YEAST	2	2	2	sp|P09064|IF2B_YEAST Eukaryotic translation initiation factor 2 subunit beta OS=Saccharomyces cerevisiae (strain ATCC 204508 / S288c) GN=SUI3 PE=1 SV=2	1	2	2	2	12.6	12.6	12.6	31.574	285	285	0	19.224	0.54484	1.0033	37.055	2	1	Median	161000000	115000000	46208000				88	449;2436	True;True	479;2613	668;3565	1007;5310;5311	1007;5310
sp|P09436|SYIC_YEAST	sp|P09436|SYIC_YEAST	3	3	3	sp|P09436|SYIC_YEAST Isoleucine--tRNA ligase, cytoplasmic OS=Saccharomyces cerevisiae (strain ATCC 204508 / S288c) GN=ILS1 PE=1 SV=1	1	3	3	3	2.9	2.9	2.9	122.98	1072	1072	0	24.159	0.59814	1.0924	32.105	4	0	Leave out requantified	323000000	226000000	97184000				89	754;2702;2737	True;True;True	799;2903;2941	1103;1104;3955;4014	1648;1649;5910;5911;6001	1648;5911;6001
sp|P09457|ATPO_YEAST	sp|P09457|ATPO_YEAST	2	2	2	sp|P09457|ATPO_YEAST ATP synthase subunit 5, mitochondrial OS=Saccharomyces cerevisiae (strain ATCC 204508 / S288c) GN=ATP5 PE=1 SV=1	1	2	2	2	13.2	13.2	13.2	22.814	212	212	0	14.949	0.3755	0.70307	4.1438	2	0	Median	118000000	85480000	32965000				90	974;1793	True;True	1030;1921	1419;2610	2128;3878	2128;3878
sp|P09733|TBA1_YEAST;sp|P09734|TBA3_YEAST	sp|P09733|TBA1_YEAST;sp|P09734|TBA3_YEAST	5;3	5;3	5;3	sp|P09733|TBA1_YEAST Tubulin alpha-1 chain OS=Saccharomyces cerevisiae (strain ATCC 204508 / S288c) GN=TUB1 PE=1 SV=2;sp|P09734|TBA3_YEAST Tubulin alpha-3 chain OS=Saccharomyces cerevisiae (strain ATCC 204508 / S288c) GN=TUB3 PE=1 SV=1	2	5	5	5	15	15	15	49.799	447	447;445	0	40.398	0.36317	0.71683	13.565	5	0	Leave out requantified	393000000	282000000	112000000				91	102;308;410;773;1033	True;True;True;True;True	108;327;437;818;1091	146;463;612;1128;1504	227;698;912;1681;2254	227;698;912;1681;2254
sp|P09798|CDC16_YEAST	sp|P09798|CDC16_YEAST	27	27	27	sp|P09798|CDC16_YEAST Anaphase-promoting complex subunit CDC16 OS=Saccharomyces cerevisiae (strain ATCC 204508 / S288c) GN=CDC16 PE=1 SV=1	1	27	27	27	32.7	32.7	32.7	94.991	840	840	0	216.78	0.9826	1.905	16.752	37	3	Leave out requantified	6380000000	3210000000	3170000000				92	86;202;305;347;389;609;1192;1268;1329;1397;1416;1555;1665;1732;1745;1847;1852;2249;2256;2262;2300;2361;2490;2507;2596;2895;2906	True;True;True;True;True;True;True;True;True;True;True;True;True;True;True;True;True;True;True;True;True;True;True;True;True;True;True	92;217;323;371;415;647;1264;1344;1406;1476;1497;1649;1768;1769;1854;1867;1868;1982;1987;1988;2412;2420;2427;2428;2468;2532;2672;2691;2786;3109;3121	129;309;455;456;522;585;898;1748;1853;1854;1937;2031;2059;2250;2401;2402;2524;2540;2541;2693;2699;2700;3289;3298;3299;3308;3309;3310;3311;3367;3455;3456;3650;3676;3801;4253;4274	199;470;688;689;782;873;874;1344;2622;2623;2783;2784;2785;2891;3033;3034;3084;3362;3577;3578;3579;3749;3776;3777;4019;4020;4029;4030;4031;4032;4884;4885;4897;4898;4899;4900;4916;4917;4918;4919;4920;5005;5130;5131;5132;5441;5481;5482;5688;5689;6340;6341;6367	199;470;689;782;874;1344;2623;2783;2891;3033;3084;3362;3578;3749;3776;4019;4029;4884;4898;4917;5005;5132;5441;5481;5688;6340;6367		103;104;105;106;107			149;357;398;773;797
sp|Q3E792|RS25A_YEAST;sp|P0C0T4|RS25B_YEAST	sp|Q3E792|RS25A_YEAST;sp|P0C0T4|RS25B_YEAST	4;4	4;4	4;4	sp|Q3E792|RS25A_YEAST 40S ribosomal protein S25-A OS=Saccharomyces cerevisiae (strain ATCC 204508 / S288c) GN=RPS25A PE=1 SV=1;sp|P0C0T4|RS25B_YEAST 40S ribosomal protein S25-B OS=Saccharomyces cerevisiae (strain ATCC 204508 / S288c) GN=RPS25B PE=1 SV=1	2	4	4	4	30.6	30.6	30.6	12.039	108	108;108	0	40.543	0.33749	0.80151	15.446	7	1	Leave out requantified	3950000000	2900000000	1050000000				93	162;163;442;2967	True;True;True;True	177;178;472;3188	255;256;257;258;259;660;4364	385;386;387;388;389;390;391;392;995;996;6495	385;392;995;6495
sp|Q3E754|RS21B_YEAST;sp|P0C0V8|RS21A_YEAST	sp|Q3E754|RS21B_YEAST;sp|P0C0V8|RS21A_YEAST	6;6	6;6	6;6	sp|Q3E754|RS21B_YEAST 40S ribosomal protein S21-B OS=Saccharomyces cerevisiae (strain ATCC 204508 / S288c) GN=RPS21B PE=1 SV=1;sp|P0C0V8|RS21A_YEAST 40S ribosomal protein S21-A OS=Saccharomyces cerevisiae (strain ATCC 204508 / S288c) GN=RPS21A PE=1 SV=1	2	6	6	6	63.2	63.2	63.2	9.7597	87	87;87	0	65.469	0.4297	0.82552	10.696	8	1	Leave out requantified	1410000000	992000000	422000000				94	22;760;1345;1664;1897;2286	True;True;True;True;True;True	22;805;1423;1766;1767;2033;2454	28;29;1113;1960;2399;2400;2764;3345	44;45;46;1662;1663;2927;2928;3574;3575;3576;4121;4978	46;1663;2927;3576;4121;4978		108			1
sp|Q3E7Y3|RS22B_YEAST;sp|P0C0W1|RS22A_YEAST	sp|Q3E7Y3|RS22B_YEAST;sp|P0C0W1|RS22A_YEAST	7;7	7;7	7;7	sp|Q3E7Y3|RS22B_YEAST 40S ribosomal protein S22-B OS=Saccharomyces cerevisiae (strain ATCC 204508 / S288c) GN=RPS22B PE=1 SV=3;sp|P0C0W1|RS22A_YEAST 40S ribosomal protein S22-A OS=Saccharomyces cerevisiae (strain ATCC 204508 / S288c) GN=RPS22A PE=1 SV=2	2	7	7	7	62.3	62.3	62.3	14.626	130	130;130	0	65.59	0.2667	0.57421	12.009	10	3	Leave out requantified	3750000000	2870000000	883000000				95	242;672;911;1180;1964;2310;2844	True;True;True;True;True;True;True	259;711;963;1252;2107;2108;2479;3057	371;986;1323;1729;1730;2858;2859;3382;3383;4175	563;1474;1994;1995;2595;2596;2597;4258;4259;5026;5027;5028;5029;6224;6225	563;1474;1994;2595;4259;5026;6224		109			111
sp|Q3E757|RL11B_YEAST;sp|P0C0W9|RL11A_YEAST	sp|Q3E757|RL11B_YEAST;sp|P0C0W9|RL11A_YEAST	8;8	8;8	8;8	sp|Q3E757|RL11B_YEAST 60S ribosomal protein L11-B OS=Saccharomyces cerevisiae (strain ATCC 204508 / S288c) GN=RPL11B PE=1 SV=3;sp|P0C0W9|RL11A_YEAST 60S ribosomal protein L11-A OS=Saccharomyces cerevisiae (strain ATCC 204508 / S288c) GN=RPL11A PE=1 SV=2	2	8	8	8	44.3	44.3	44.3	19.749	174	174;174	0	71.645	0.48427	1.0334	9.2307	13	2	Leave out requantified	5640000000	3790000000	1840000000				96	34;417;1636;1988;2529;2696;2860;2865	True;True;True;True;True;True;True;True	35;445;1734;2134;2715;2897;3073;3078	46;47;623;624;2357;2891;2892;3709;3710;3945;4201;4202;4208	70;71;930;931;932;3512;4301;4302;4303;4304;5535;5536;5537;5896;5897;6266;6267;6268;6269;6277	70;932;3512;4302;5535;5897;6268;6277		110;111			125;131
sp|Q3E7X9|RS28A_YEAST;sp|P0C0X0|RS28B_YEAST	sp|Q3E7X9|RS28A_YEAST;sp|P0C0X0|RS28B_YEAST	1;1	1;1	1;1	sp|Q3E7X9|RS28A_YEAST 40S ribosomal protein S28-A OS=Saccharomyces cerevisiae (strain ATCC 204508 / S288c) GN=RPS28A PE=1 SV=1;sp|P0C0X0|RS28B_YEAST 40S ribosomal protein S28-B OS=Saccharomyces cerevisiae (strain ATCC 204508 / S288c) GN=RPS28B PE=1 SV=1	2	1	1	1	13.4	13.4	13.4	7.5917	67	67;67	0.002809	6.9488	0.36382	0.68756	NaN	1	0	Median	152000000	112000000	39360000				97	2611	TRUE	2802	3823	5722;5723	5722
sp|P0C2H7|RL27B_YEAST;sp|P0C2H6|RL27A_YEAST	sp|P0C2H7|RL27B_YEAST;sp|P0C2H6|RL27A_YEAST	7;7	7;7	7;7	sp|P0C2H7|RL27B_YEAST 60S ribosomal protein L27-B OS=Saccharomyces cerevisiae (strain ATCC 204508 / S288c) GN=RPL27B PE=1 SV=1;sp|P0C2H6|RL27A_YEAST 60S ribosomal protein L27-A OS=Saccharomyces cerevisiae (strain ATCC 204508 / S288c) GN=RPL27A PE=1 SV=1	2	7	7	7	50	50	50	15.505	136	136;136	0	65.722	0.40239	0.90801	10.335	13	3	Leave out requantified	10500000000	7130000000	3400000000				98	1313;1843;2174;2347;2812;2817;2953	True;True;True;True;True;True;True	1390;1978;2331;2518;3022;3028;3172	1915;2688;2689;3166;3167;3168;3436;3437;4118;4119;4120;4127;4128;4337	2860;4010;4011;4012;4013;4695;4696;4697;5105;5106;5107;6142;6143;6144;6145;6154;6155;6156;6157;6456	2860;4012;4696;5105;6145;6156;6456
sp|P0C2H8|RL31A_YEAST	sp|P0C2H8|RL31A_YEAST	8	8	1	sp|P0C2H8|RL31A_YEAST 60S ribosomal protein L31-A OS=Saccharomyces cerevisiae (strain ATCC 204508 / S288c) GN=RPL31A PE=1 SV=1	1	8	8	1	61.9	61.9	8	12.953	113	113	0	71.051	0.48102	0.93581	10.677	10	2	Leave out requantified	2990000000	1990000000	1000000000				99	613;811;1342;1432;1435;1736;1826;2069	True;True;True;True;True;True;True;True	651;856;1420;1515;1518;1519;1858;1961;2218	904;1174;1956;1957;2080;2084;2085;2529;2530;2666;2667;3008	1351;1750;2921;2922;3114;3119;3120;3758;3759;3760;3761;3982;3983;3984;4464	1351;1750;2921;3114;3119;3761;3984;4464		112			44
sp|P0C2H9|RL31B_YEAST	sp|P0C2H9|RL31B_YEAST	8	1	1	sp|P0C2H9|RL31B_YEAST 60S ribosomal protein L31-B OS=Saccharomyces cerevisiae (strain ATCC 204508 / S288c) GN=RPL31B PE=1 SV=1	1	8	1	1	61.9	8	8	12.967	113	113	1	-2	0.48151	0.89175	6.3071	2	2	Median	14569000	7998800	6570600	#ERROR!			100	613;811;1342;1432;1436;1736;1826;2069	False;False;False;False;True;False;False;False	651;856;1420;1515;1520;1858;1961;2218	904;1174;1956;1957;2080;2086;2087;2529;2530;2666;2667;3008	1351;1750;2921;2922;3114;3121;3122;3758;3759;3760;3761;3982;3983;3984;4464	1351;1750;2921;3114;3121;3761;3984;4464		113			44
sp|P0CH08|RL401_YEAST;sp|P0CH09|RL402_YEAST;sp|P0CG63|UBI4P_YEAST	sp|P0CH08|RL401_YEAST;sp|P0CH09|RL402_YEAST;sp|P0CG63|UBI4P_YEAST	4;4;3	1;1;0	1;1;0	sp|P0CH08|RL401_YEAST Ubiquitin-60S ribosomal protein L40 OS=Saccharomyces cerevisiae (strain ATCC 204508 / S288c) GN=RPL40A PE=1 SV=1;sp|P0CH09|RL402_YEAST Ubiquitin-60S ribosomal protein L40 OS=Saccharomyces cerevisiae (strain ATCC 204508 / S288c) GN=RPL	3	4	1	1	31.2	7.8	7.8	14.554	128	128;128;381	0.003012	8.8913	0.34835	0.64009	3.6764	2	0	Median	27601000	19570000	8031000				101	238;565;1450;2476	True;False;False;False	254;602;1536;2655	364;365;837;2107;3623	551;552;1257;3147;5401;5402	551;1257;3147;5401	0			48
sp|P0CS90|HSP77_YEAST;sp|P39987|HSP7E_YEAST	sp|P0CS90|HSP77_YEAST	10;4	10;4	10;4	sp|P0CS90|HSP77_YEAST Heat shock protein SSC1, mitochondrial OS=Saccharomyces cerevisiae (strain ATCC 204508 / S288c) GN=SSC1 PE=1 SV=1	2	10	10	10	17.6	17.6	17.6	70.627	654	654;644	0	69.276	0.47011	0.88183	8.623	9	2	Leave out requantified	732000000	474000000	259000000				102	25;160;256;1043;1280;1390;2055;2532;2748;2816	True;True;True;True;True;True;True;True;True;True	25;175;273;1101;1356;1469;2204;2718;2952;3027	32;252;387;1519;1870;2022;2023;2990;3713;4028;4126	50;380;381;587;2277;2807;3023;3024;4436;5541;6021;6153	50;380;587;2277;2807;3023;4436;5541;6021;6153
sp|P0CX24|RL20B_YEAST;sp|P0CX23|RL20A_YEAST	sp|P0CX24|RL20B_YEAST;sp|P0CX23|RL20A_YEAST	10;10	10;10	10;10	sp|P0CX24|RL20B_YEAST 60S ribosomal protein L20-B OS=Saccharomyces cerevisiae (strain ATCC 204508 / S288c) GN=RPL20B PE=1 SV=1;sp|P0CX23|RL20A_YEAST 60S ribosomal protein L20-A OS=Saccharomyces cerevisiae (strain ATCC 204508 / S288c) GN=RPL20A PE=1 SV=1	2	10	10	10	48.3	48.3	48.3	20.437	172	172;172	0	100.22	0.42706	0.95954	26.474	16	3	Leave out requantified	10200000000	7080000000	3070000000				103	177;612;1010;1211;1546;1747;2067;2168;2566;2972	True;True;True;True;True;True;True;True;True;True	192;650;1067;1283;1640;1870;2216;2325;2755;3194	277;278;902;903;1468;1469;1470;1770;1771;2238;2543;3005;3006;3157;3761;4375	415;416;417;418;1349;1350;2197;2198;2199;2651;2652;2653;3342;3780;3781;4459;4460;4461;4462;4676;4677;4678;4679;4680;4681;5625;5626;6512	418;1350;2197;2651;3342;3780;4459;4678;5625;6512		114;115			90;110
sp|P0CX26|RL43B_YEAST;sp|P0CX25|RL43A_YEAST	sp|P0CX26|RL43B_YEAST;sp|P0CX25|RL43A_YEAST	6;6	6;6	6;6	sp|P0CX26|RL43B_YEAST 60S ribosomal protein L43-B OS=Saccharomyces cerevisiae (strain ATCC 204508 / S288c) GN=RPL43B PE=1 SV=1;sp|P0CX25|RL43A_YEAST 60S ribosomal protein L43-A OS=Saccharomyces cerevisiae (strain ATCC 204508 / S288c) GN=RPL43A PE=1 SV=1	2	6	6	6	66.3	66.3	66.3	10.091	92	92;92	0	54.733	0.35447	0.73378	18.444	7	0	Leave out requantified	3590000000	2640000000	951000000				104	734;1262;1301;1563;2537;2861	True;True;True;True;True;True	777;1337;1378;1657;2723;3074	1068;1842;1900;2259;3719;3720;4203;4204	1601;1602;2768;2840;3372;5549;5550;5551;5552;6270;6271;6272;6273	1601;2768;2840;3372;5549;6273
sp|P0CX28|RL44B_YEAST;sp|P0CX27|RL44A_YEAST	sp|P0CX28|RL44B_YEAST;sp|P0CX27|RL44A_YEAST	1;1	1;1	1;1	sp|P0CX28|RL44B_YEAST 60S ribosomal protein L42-B OS=Saccharomyces cerevisiae (strain ATCC 204508 / S288c) GN=RPL42B PE=1 SV=1;sp|P0CX27|RL44A_YEAST 60S ribosomal protein L42-A OS=Saccharomyces cerevisiae (strain ATCC 204508 / S288c) GN=RPL42A PE=1 SV=1	2	1	1	1	7.5	7.5	7.5	12.211	106	106;106	0.002732	6.7528	0.37539	0.84685	NaN	1	0	Median	491000000	357000000	134000000				105	895	TRUE	945	1297	1955	1955
sp|P0CX30|RS23B_YEAST;sp|P0CX29|RS23A_YEAST	sp|P0CX30|RS23B_YEAST;sp|P0CX29|RS23A_YEAST	6;6	6;6	6;6	sp|P0CX30|RS23B_YEAST 40S ribosomal protein S23-B OS=Saccharomyces cerevisiae (strain ATCC 204508 / S288c) GN=RPS23B PE=1 SV=1;sp|P0CX29|RS23A_YEAST 40S ribosomal protein S23-A OS=Saccharomyces cerevisiae (strain ATCC 204508 / S288c) GN=RPS23A PE=1 SV=1	2	6	6	6	49.7	49.7	49.7	16.038	145	145;145	0	47.175	0.43681	0.82723	15.785	8	3	Leave out requantified	2430000000	1650000000	787000000				106	105;1486;2304;2755;2768;2830	True;True;True;True;True;True	111;1574;2473;2959;2973;3042	149;2154;3373;3374;3375;4037;4056;4151;4152	230;3218;3219;3220;5014;5015;5016;6032;6033;6057;6193;6194;6195	230;3219;5015;6032;6057;6195
sp|P0CX32|RS24B_YEAST;sp|P0CX31|RS24A_YEAST	sp|P0CX32|RS24B_YEAST;sp|P0CX31|RS24A_YEAST	9;9	9;9	9;9	sp|P0CX32|RS24B_YEAST 40S ribosomal protein S24-B OS=Saccharomyces cerevisiae (strain ATCC 204508 / S288c) GN=RPS24B PE=1 SV=1;sp|P0CX31|RS24A_YEAST 40S ribosomal protein S24-A OS=Saccharomyces cerevisiae (strain ATCC 204508 / S288c) GN=RPS24A PE=1 SV=1	2	9	9	9	46.7	46.7	46.7	15.329	135	135;135	0	72.894	0.41735	0.88502	13.8	12	5	Leave out requantified	6600000000	4500000000	2100000000				107	38;264;1232;1285;1304;1970;2117;2337;2682	True;True;True;True;True;True;True;True;True	39;282;1305;1361;1381;2114;2269;2508;2881	52;401;402;1803;1876;1877;1903;2866;2867;3077;3421;3925	78;609;610;611;2706;2813;2814;2844;2845;4267;4268;4269;4564;5089;5090;5869	78;609;2706;2813;2844;4269;4564;5089;5869
sp|P0CX34|RS30B_YEAST;sp|P0CX33|RS30A_YEAST	sp|P0CX34|RS30B_YEAST;sp|P0CX33|RS30A_YEAST	3;3	3;3	3;3	sp|P0CX34|RS30B_YEAST 40S ribosomal protein S30-B OS=Saccharomyces cerevisiae (strain ATCC 204508 / S288c) GN=RPS30B PE=1 SV=1;sp|P0CX33|RS30A_YEAST 40S ribosomal protein S30-A OS=Saccharomyces cerevisiae (strain ATCC 204508 / S288c) GN=RPS30A PE=1 SV=1	2	3	3	3	39.7	39.7	39.7	7.1184	63	63;63	0	22.483	0.4282	0.88048	16.638	2	0	Median	598000000	410000000	188000000				108	717;1692;2659	True;True;True	759;1806;2854	1046;2452;3893;3894	1570;1571;3642;5822;5823	1570;3642;5822		116			56
sp|P0CX36|RS4B_YEAST;sp|P0CX35|RS4A_YEAST	sp|P0CX36|RS4B_YEAST;sp|P0CX35|RS4A_YEAST	17;17	17;17	17;17	sp|P0CX36|RS4B_YEAST 40S ribosomal protein S4-B OS=Saccharomyces cerevisiae (strain ATCC 204508 / S288c) GN=RPS4B PE=1 SV=1;sp|P0CX35|RS4A_YEAST 40S ribosomal protein S4-A OS=Saccharomyces cerevisiae (strain ATCC 204508 / S288c) GN=RPS4A PE=1 SV=1	2	17	17	17	55.6	55.6	55.6	29.41	261	261;261	0	154.28	0.45469	0.94812	23.501	25	2	Leave out requantified	14600000000	9860000000	4790000000				109	338;555;558;872;890;990;1028;1147;1327;1528;1529;1564;1579;1584;1650;1936;2389	True;True;True;True;True;True;True;True;True;True;True;True;True;True;True;True;True	362;592;595;920;939;1046;1085;1216;1404;1619;1620;1658;1673;1678;1748;2076;2560	509;510;821;822;827;828;1261;1262;1287;1288;1439;1495;1496;1682;1683;1933;1934;2211;2212;2260;2279;2286;2374;2375;2815;3496;3497	763;764;765;1234;1235;1236;1242;1243;1244;1245;1246;1247;1894;1895;1896;1942;1943;1944;2154;2238;2239;2240;2520;2521;2522;2523;2884;2885;2886;3303;3304;3373;3397;3398;3407;3408;3536;3537;4188;5184;5185;5186	765;1234;1244;1896;1944;2154;2239;2522;2886;3303;3304;3373;3397;3408;3536;4188;5186
sp|P0CX38|RS6B_YEAST;sp|P0CX37|RS6A_YEAST	sp|P0CX38|RS6B_YEAST;sp|P0CX37|RS6A_YEAST	11;11	11;11	11;11	sp|P0CX38|RS6B_YEAST 40S ribosomal protein S6-B OS=Saccharomyces cerevisiae (strain ATCC 204508 / S288c) GN=RPS6B PE=1 SV=1;sp|P0CX37|RS6A_YEAST 40S ribosomal protein S6-A OS=Saccharomyces cerevisiae (strain ATCC 204508 / S288c) GN=RPS6A PE=1 SV=1	2	11	11	11	48.7	48.7	48.7	26.996	236	236;236	0	111.26	0.53131	1.1729	12.409	16	1	Leave out requantified	15800000000	10200000000	5620000000				110	375;411;737;1026;1233;1238;1239;1519;1894;1976;2401	True;True;True;True;True;True;True;True;True;True;True	399;438;780;1083;1306;1312;1313;1608;2030;2120;2572	557;558;613;614;1073;1074;1493;1804;1813;1814;1815;2194;2760;2873;3509;3510	833;834;835;836;913;914;915;916;1607;1608;1609;1610;1611;1612;2235;2236;2707;2718;2719;2720;2721;2722;3274;3275;4113;4114;4276;4277;5202;5203;5204;5205	835;916;1611;2235;2707;2718;2722;3275;4114;4277;5202
sp|P0CX40|RS8B_YEAST;sp|P0CX39|RS8A_YEAST	sp|P0CX40|RS8B_YEAST;sp|P0CX39|RS8A_YEAST	9;9	9;9	9;9	sp|P0CX40|RS8B_YEAST 40S ribosomal protein S8-B OS=Saccharomyces cerevisiae (strain ATCC 204508 / S288c) GN=RPS8B PE=1 SV=1;sp|P0CX39|RS8A_YEAST 40S ribosomal protein S8-A OS=Saccharomyces cerevisiae (strain ATCC 204508 / S288c) GN=RPS8A PE=1 SV=1	2	9	9	9	43.5	43.5	43.5	22.489	200	200;200	0	92.895	0.35154	0.78669	10.187	14	2	Leave out requantified	8510000000	6240000000	2270000000				111	13;422;965;1006;1007;1008;1654;1886;2045	True;True;True;True;True;True;True;True;True	13;450;1019;1063;1064;1065;1752;2022;2194	18;632;1403;1404;1463;1464;1465;2381;2382;2743;2744;2745;2977;2978	31;32;950;951;2106;2107;2108;2109;2110;2188;2189;2190;2191;2192;2193;3547;3548;3549;4087;4088;4089;4090;4417;4418;4419	32;950;2110;2189;2191;2193;3547;4087;4419
sp|P0CX42|RL23B_YEAST;sp|P0CX41|RL23A_YEAST	sp|P0CX42|RL23B_YEAST;sp|P0CX41|RL23A_YEAST	6;6	6;6	6;6	sp|P0CX42|RL23B_YEAST 60S ribosomal protein L23-B OS=Saccharomyces cerevisiae (strain ATCC 204508 / S288c) GN=RPL23B PE=1 SV=1;sp|P0CX41|RL23A_YEAST 60S ribosomal protein L23-A OS=Saccharomyces cerevisiae (strain ATCC 204508 / S288c) GN=RPL23A PE=1 SV=1	2	6	6	6	48.2	48.2	48.2	14.473	137	137;137	0	52.688	0.35629	0.76176	10.509	17	3	Leave out requantified	8240000000	6030000000	2210000000				112	408;1142;1243;1536;1807;2717	True;True;True;True;True;True	435;1210;1211;1317;1627;1628;1629;1937;2918;2919	610;1671;1672;1673;1674;1675;1820;2219;2220;2221;2222;2223;2224;2631;2632;3977;3978;3979	909;910;2503;2504;2505;2506;2507;2508;2509;2510;2511;2512;2727;2728;2729;2730;2731;3311;3312;3313;3314;3315;3316;3317;3318;3319;3320;3904;3905;3906;5942;5943;5944;5945;5946	909;2510;2729;3319;3906;5944		117;118;119;120			23;57;59;74
sp|P0CX44|RL1B_YEAST;sp|P0CX43|RL1A_YEAST	sp|P0CX44|RL1B_YEAST;sp|P0CX43|RL1A_YEAST	9;9	9;9	9;9	sp|P0CX44|RL1B_YEAST 60S ribosomal protein L1-B OS=Saccharomyces cerevisiae (strain ATCC 204508 / S288c) GN=RPL1B PE=1 SV=1;sp|P0CX43|RL1A_YEAST 60S ribosomal protein L1-A OS=Saccharomyces cerevisiae (strain ATCC 204508 / S288c) GN=RPL1A PE=1 SV=1	2	9	9	9	35.5	35.5	35.5	24.485	217	217;217	0	84.446	0.39115	0.81442	16.478	16	1	Leave out requantified	6040000000	4320000000	1720000000				113	67;694;1156;1484;1901;2113;2114;2301;2923	True;True;True;True;True;True;True;True;True	70;735;1227;1572;2037;2264;2265;2266;2469;2470;3141	96;97;1017;1018;1699;2152;2770;2771;3070;3071;3072;3073;3074;3368;3369;3370;4296	150;151;1526;1527;1528;2545;2546;3215;3216;4127;4128;4129;4552;4553;4554;4555;4556;4557;4558;4559;4560;5006;5007;5008;5009;6395;6396	151;1526;2546;3215;4129;4553;4558;5008;6396		121;122			85;210
sp|P0CX46|RL2B_YEAST;sp|P0CX45|RL2A_YEAST	sp|P0CX46|RL2B_YEAST;sp|P0CX45|RL2A_YEAST	14;14	14;14	14;14	sp|P0CX46|RL2B_YEAST 60S ribosomal protein L2-B OS=Saccharomyces cerevisiae (strain ATCC 204508 / S288c) GN=RPL2B PE=1 SV=1;sp|P0CX45|RL2A_YEAST 60S ribosomal protein L2-A OS=Saccharomyces cerevisiae (strain ATCC 204508 / S288c) GN=RPL2A PE=1 SV=1	2	14	14	14	65.4	65.4	65.4	27.408	254	254;254	0	174.87	0.49645	1.025	11.831	25	1	Leave out requantified	15100000000	10000000000	5100000000				114	68;178;182;735;858;866;1212;1305;1562;1986;2457;2599;2751;2806	True;True;True;True;True;True;True;True;True;True;True;True;True;True	71;193;197;778;905;913;1284;1382;1656;2131;2636;2789;2955;3014	98;279;280;284;285;1069;1070;1239;1240;1241;1251;1252;1772;1773;1904;1905;2258;2887;2888;3595;3596;3805;3806;4032;4109	152;419;420;421;422;426;427;1603;1604;1853;1854;1855;1856;1857;1878;1879;1880;1881;1882;2654;2655;2656;2657;2846;2847;2848;3371;4295;4296;4297;5354;5355;5356;5357;5694;5695;5696;6026;6128;6129	152;421;427;1603;1855;1881;2654;2847;3371;4295;5357;5694;6026;6129		123			204
sp|P0CX48|RS11B_YEAST;sp|P0CX47|RS11A_YEAST	sp|P0CX48|RS11B_YEAST;sp|P0CX47|RS11A_YEAST	8;8	8;8	8;8	sp|P0CX48|RS11B_YEAST 40S ribosomal protein S11-B OS=Saccharomyces cerevisiae (strain ATCC 204508 / S288c) GN=RPS11B PE=1 SV=1;sp|P0CX47|RS11A_YEAST 40S ribosomal protein S11-A OS=Saccharomyces cerevisiae (strain ATCC 204508 / S288c) GN=RPS11A PE=1 SV=1	2	8	8	8	55.1	55.1	55.1	17.749	156	156;156	0	75.478	0.39355	0.87431	13.543	14	0	Leave out requantified	10600000000	7530000000	3020000000				115	229;247;1094;1890;2013;2316;2363;2750	True;True;True;True;True;True;True;True	245;264;1155;2026;2160;2485;2534;2954	352;376;377;1593;1594;2752;2753;2930;3389;3390;3458;3459;4030;4031	533;534;571;572;573;2378;2379;2380;2381;4101;4102;4103;4355;4356;5036;5037;5038;5039;5134;5135;5136;6023;6024;6025	533;571;2378;4102;4356;5038;5135;6025
sp|P0CX50|RL18B_YEAST;sp|P0CX49|RL18A_YEAST	sp|P0CX50|RL18B_YEAST;sp|P0CX49|RL18A_YEAST	9;9	9;9	9;9	sp|P0CX50|RL18B_YEAST 60S ribosomal protein L18-B OS=Saccharomyces cerevisiae (strain ATCC 204508 / S288c) GN=RPL18B PE=1 SV=1;sp|P0CX49|RL18A_YEAST 60S ribosomal protein L18-A OS=Saccharomyces cerevisiae (strain ATCC 204508 / S288c) GN=RPL18A PE=1 SV=1	2	9	9	9	36	36	36	20.563	186	186;186	0	61.414	0.38978	0.76219	17.03	11	4	Leave out requantified	4830000000	3240000000	1590000000				116	785;896;1114;1657;2082;2132;2381;2535;2557	True;True;True;True;True;True;True;True;True	830;946;1179;1755;2231;2285;2552;2721;2746	1142;1298;1631;1632;2385;3024;3101;3102;3484;3717;3750	1700;1701;1702;1703;1704;1956;1957;1958;1959;2435;2436;2437;3553;3554;4493;4603;4604;5167;5547;5609;5610;5611;5612	1701;1957;2436;3553;4493;4603;5167;5547;5609		124			155
sp|P0CX52|RS16B_YEAST;sp|P0CX51|RS16A_YEAST	sp|P0CX52|RS16B_YEAST;sp|P0CX51|RS16A_YEAST	13;13	13;13	13;13	sp|P0CX52|RS16B_YEAST 40S ribosomal protein S16-B OS=Saccharomyces cerevisiae (strain ATCC 204508 / S288c) GN=RPS16B PE=1 SV=1;sp|P0CX51|RS16A_YEAST 40S ribosomal protein S16-A OS=Saccharomyces cerevisiae (strain ATCC 204508 / S288c) GN=RPS16A PE=1 SV=1	2	13	13	13	73.4	73.4	73.4	15.847	143	143;143	0	106.54	0.32871	0.69271	12.687	24	2	Leave out requantified	12000000000	9000000000	3030000000				117	54;661;702;817;2103;2111;2473;2725;2777;2825;2957;2958;2959	True;True;True;True;True;True;True;True;True;True;True;True;True	56;700;744;863;2254;2262;2652;2929;2982;3036;3176;3177;3178	78;972;1029;1030;1183;1184;3057;3058;3067;3068;3619;3620;3994;3995;4067;4068;4140;4141;4142;4342;4343;4344;4345;4346;4347	121;1453;1545;1546;1547;1765;1766;1767;4532;4533;4534;4535;4547;4548;4549;5396;5397;5398;5969;5970;5971;5972;6071;6072;6073;6175;6176;6177;6178;6179;6462;6463;6464;6465;6466;6467;6468;6469;6470;6471;6472;6473	121;1453;1547;1765;4532;4548;5398;5969;6073;6178;6464;6468;6472
sp|P0CX54|RL12B_YEAST;sp|P0CX53|RL12A_YEAST	sp|P0CX54|RL12B_YEAST;sp|P0CX53|RL12A_YEAST	9;9	9;9	9;9	sp|P0CX54|RL12B_YEAST 60S ribosomal protein L12-B OS=Saccharomyces cerevisiae (strain ATCC 204508 / S288c) GN=RPL12B PE=1 SV=1;sp|P0CX53|RL12A_YEAST 60S ribosomal protein L12-A OS=Saccharomyces cerevisiae (strain ATCC 204508 / S288c) GN=RPL12A PE=1 SV=1	2	9	9	9	65.5	65.5	65.5	17.822	165	165;165	0	77.784	0.28137	0.58629	9.9481	13	3	Leave out requantified	6070000000	4700000000	1370000000				118	206;475;946;1025;1300;1825;1937;1938;2452	True;True;True;True;True;True;True;True;True	221;506;1000;1082;1377;1960;2077;2078;2631	315;316;704;1378;1379;1491;1492;1898;1899;2665;2816;2817;2818;3589	477;478;479;480;1067;1068;2076;2077;2078;2232;2233;2234;2838;2839;3981;4189;4190;4191;4192;4193;4194;5347	480;1067;2078;2232;2838;3981;4189;4194;5347
sp|P0CX56|RS18B_YEAST;sp|P0CX55|RS18A_YEAST	sp|P0CX56|RS18B_YEAST;sp|P0CX55|RS18A_YEAST	17;17	17;17	17;17	sp|P0CX56|RS18B_YEAST 40S ribosomal protein S18-B OS=Saccharomyces cerevisiae (strain ATCC 204508 / S288c) GN=RPS18B PE=1 SV=1;sp|P0CX55|RS18A_YEAST 40S ribosomal protein S18-A OS=Saccharomyces cerevisiae (strain ATCC 204508 / S288c) GN=RPS18A PE=1 SV=1	2	17	17	17	75.3	75.3	75.3	17.037	146	146;146	0	266.99	0.41808	0.9214	12.034	30	5	Leave out requantified	31700000000	22200000000	9520000000				119	29;30;61;369;1117;1172;1181;1197;1198;1493;1561;2001;2002;2051;2089;2247;2949	True;True;True;True;True;True;True;True;True;True;True;True;True;True;True;True;True	30;31;63;393;1182;1243;1244;1253;1269;1270;1581;1655;2147;2148;2200;2238;2410;3168	39;40;87;88;550;551;1637;1717;1718;1719;1731;1732;1753;1754;1755;2161;2162;2257;2908;2909;2910;2911;2912;2913;2914;2985;2986;3034;3285;3286;4333	60;61;134;135;136;137;822;823;824;825;2444;2445;2446;2447;2574;2575;2576;2577;2578;2579;2580;2598;2599;2600;2601;2628;2629;2630;3229;3230;3231;3232;3370;4327;4328;4329;4330;4331;4332;4333;4334;4335;4336;4337;4429;4430;4505;4875;4876;4877;4878;4879;4880;4881;6450;6451	60;61;136;822;2446;2579;2600;2629;2630;3231;3370;4327;4336;4429;4505;4877;6450		125			73
sp|P0CX83|RL19B_YEAST;sp|P0CX82|RL19A_YEAST	sp|P0CX83|RL19B_YEAST;sp|P0CX82|RL19A_YEAST	7;7	7;7	7;7	sp|P0CX83|RL19B_YEAST 60S ribosomal protein L19-B OS=Saccharomyces cerevisiae (strain ATCC 204508 / S288c) GN=RPL19B PE=1 SV=1;sp|P0CX82|RL19A_YEAST 60S ribosomal protein L19-A OS=Saccharomyces cerevisiae (strain ATCC 204508 / S288c) GN=RPL19A PE=1 SV=1	2	7	7	7	33.9	33.9	33.9	21.704	189	189;189	0	67.494	0.50602	1.082	7.735	12	3	Leave out requantified	6920000000	4370000000	2550000000				120	126;133;259;1314;1328;1545;2823	True;True;True;True;True;True;True	136;143;276;1391;1405;1639;3034	188;189;199;200;201;391;1916;1935;1936;2237;4136;4137	287;288;289;290;308;309;310;592;593;2861;2887;2888;2889;2890;3340;3341;6168;6169;6170;6171	289;308;593;2861;2889;3341;6169
sp|P0CX85|RL35B_YEAST;sp|P0CX84|RL35A_YEAST	sp|P0CX85|RL35B_YEAST;sp|P0CX84|RL35A_YEAST	7;7	7;7	7;7	sp|P0CX85|RL35B_YEAST 60S ribosomal protein L35-B OS=Saccharomyces cerevisiae (strain ATCC 204508 / S288c) GN=RPL35B PE=1 SV=1;sp|P0CX84|RL35A_YEAST 60S ribosomal protein L35-A OS=Saccharomyces cerevisiae (strain ATCC 204508 / S288c) GN=RPL35A PE=1 SV=1	2	7	7	7	43.3	43.3	43.3	13.909	120	120;120	0	59.315	0.45512	0.93528	14.318	11	2	Leave out requantified	4980000000	3460000000	1520000000				121	547;639;1594;1978;2177;2207;2208	True;True;True;True;True;True;True	584;678;1688;2122;2334;2366;2367	811;943;944;2297;2875;2876;3173;3174;3225;3226;3227	1219;1408;1409;1410;1411;3427;4279;4280;4281;4709;4710;4711;4788;4789;4790;4791	1219;1410;3427;4280;4709;4788;4791
sp|P10080|SSBP1_YEAST	sp|P10080|SSBP1_YEAST	2	2	2	sp|P10080|SSBP1_YEAST Single-stranded nucleic acid-binding protein OS=Saccharomyces cerevisiae (strain ATCC 204508 / S288c) GN=SBP1 PE=1 SV=2	1	2	2	2	4.8	4.8	4.8	32.989	294	294	0	10.871	0.55196	1.0001	15.827	2	2	Median	81433000	55542000	25891000				122	987;2497	True;True	1043;2679	1435;3660	2147;5456	2147;5456		126			123
sp|P10363|PRI1_YEAST	sp|P10363|PRI1_YEAST	1	1	1	sp|P10363|PRI1_YEAST DNA primase small subunit OS=Saccharomyces cerevisiae (strain ATCC 204508 / S288c) GN=PRI1 PE=1 SV=2	1	1	1	1	2.2	2.2	2.2	47.69	409	409	1	-2	NaN	NaN	NaN	0	0	Median	0	0	0	#ERROR!			123	350	TRUE	374	525	786	786			25			95
sp|P10591|HSP71_YEAST;sp|P09435|HSP73_YEAST	sp|P10591|HSP71_YEAST	27;10	3;0	3;0	sp|P10591|HSP71_YEAST Heat shock protein SSA1 OS=Saccharomyces cerevisiae (strain ATCC 204508 / S288c) GN=SSA1 PE=1 SV=4	2	27	3	3	45	6.9	6.9	69.656	642	642;649	0	27.542	0.54886	1.0287	19.38	5	2	Median	676000000	451000000	224000000				124	173;189;257;317;519;643;644;660;1049;1050;1151;1451;1586;1639;1646;1676;1705;1751;1854;1855;1869;1872;2191;2318;2501;2598;2721	False;False;False;False;True;False;False;False;False;False;False;False;False;False;False;False;False;True;False;False;False;True;False;False;False;False;False	188;204;274;338;550;551;682;683;699;1107;1108;1220;1537;1680;1737;1744;1782;1823;1824;1874;1875;1990;1991;2005;2008;2350;2487;2683;2684;2788;2925	273;292;293;388;389;474;475;763;764;951;952;970;971;1525;1526;1527;1528;1687;1688;2108;2288;2360;2361;2369;2418;2474;2475;2476;2477;2478;2479;2480;2481;2549;2550;2702;2703;2723;2726;3202;3393;3394;3664;3665;3804;3987;3988	411;439;440;441;588;589;590;711;712;713;714;1159;1160;1419;1420;1421;1422;1450;1451;1452;2283;2284;2285;2286;2287;2288;2527;2528;2529;3148;3410;3411;3515;3516;3517;3530;3597;3598;3671;3672;3673;3674;3675;3676;3677;3678;3679;3680;3681;3682;3683;3684;3685;3686;3687;3688;3689;3690;3691;3692;3693;3694;3789;3790;4034;4035;4063;4067;4756;5052;5053;5054;5460;5461;5462;5463;5693;5957;5958;5959	411;440;590;713;1160;1420;1421;1452;2283;2288;2529;3148;3411;3517;3530;3598;3673;3790;4034;4035;4063;4067;4756;5053;5460;5693;5957		127;128;129;130;131			85;125;407;515;602
sp|P10592|HSP72_YEAST;sp|P22202|HSP74_YEAST	sp|P10592|HSP72_YEAST	34;12	34;12	10;1	sp|P10592|HSP72_YEAST Heat shock protein SSA2 OS=Saccharomyces cerevisiae (strain ATCC 204508 / S288c) GN=SSA2 PE=1 SV=3	2	34	34	10	57.1	57.1	18.8	69.469	639	639;642	0	323.31	0.53868	1.0123	16.705	50	7	Leave out requantified	12700000000	8200000000	4530000000				125	173;189;257;317;520;643;644;660;1049;1050;1151;1201;1202;1203;1451;1586;1639;1646;1676;1705;1752;1835;1854;1855;1869;1870;1871;2148;2191;2318;2501;2531;2598;2721	True;True;True;True;True;True;True;True;True;True;True;True;True;True;True;True;True;True;True;True;True;True;True;True;True;True;True;True;True;True;True;True;True;True	188;204;274;338;552;682;683;699;1107;1108;1220;1273;1274;1275;1537;1680;1737;1744;1782;1823;1824;1876;1877;1970;1990;1991;2005;2006;2007;2302;2350;2487;2683;2684;2717;2788;2925	273;292;293;388;389;474;475;765;951;952;970;971;1525;1526;1527;1528;1687;1688;1758;1759;1760;1761;2108;2288;2360;2361;2369;2418;2474;2475;2476;2477;2478;2479;2480;2481;2551;2552;2679;2702;2703;2723;2724;2725;3123;3202;3393;3394;3664;3665;3712;3804;3987;3988	411;439;440;441;588;589;590;711;712;713;714;1161;1419;1420;1421;1422;1450;1451;1452;2283;2284;2285;2286;2287;2288;2527;2528;2529;2635;2636;2637;2638;2639;3148;3410;3411;3515;3516;3517;3530;3597;3598;3671;3672;3673;3674;3675;3676;3677;3678;3679;3680;3681;3682;3683;3684;3685;3686;3687;3688;3689;3690;3691;3692;3693;3694;3791;3792;3793;3794;4000;4001;4034;4035;4063;4064;4065;4066;4627;4756;5052;5053;…	411;440;590;713;1161;1420;1421;1452;2283;2288;2529;2637;2638;2639;3148;3411;3517;3530;3598;3673;3791;4000;4034;4035;4063;4065;4066;4627;4756;5053;5460;5539;5693;5957		128;129;131;132;133;134			59;85;125;407;515;602
sp|P10622|RLA3_YEAST	sp|P10622|RLA3_YEAST	1	1	1	sp|P10622|RLA3_YEAST 60S acidic ribosomal protein P1-beta OS=Saccharomyces cerevisiae (strain ATCC 204508 / S288c) GN=RPP1B PE=1 SV=3	1	1	1	1	15.1	15.1	15.1	10.667	106	106	0	16.22	0.10566	0.24329	NaN	1	1	Median	3450000000	3100000000	344000000				126	8	TRUE	8	11	23	23
sp|P10659|METK1_YEAST	sp|P10659|METK1_YEAST	21	10	10	sp|P10659|METK1_YEAST S-adenosylmethionine synthase 1 OS=Saccharomyces cerevisiae (strain ATCC 204508 / S288c) GN=SAM1 PE=1 SV=2	1	21	10	10	66	39	39	41.818	382	382	0	149.13	0.57164	1.2061	32.691	24	8	Leave out requantified	10700000000	6450000000	4220000000				127	75;165;285;321;499;715;983;994;1030;1060;1253;1254;1524;1744;1918;2123;2245;2379;2418;2509;2874	True;True;True;False;True;False;True;True;False;False;False;False;False;False;True;True;False;True;False;True;False	80;81;180;303;342;530;757;1039;1050;1087;1119;1328;1329;1613;1614;1615;1866;2055;2276;2407;2550;2590;2591;2693;3088	112;113;114;261;262;263;430;431;479;480;481;482;736;1044;1428;1429;1443;1444;1445;1498;1499;1544;1545;1833;1834;2200;2201;2202;2203;2204;2205;2538;2539;2790;2791;3088;3089;3281;3282;3479;3480;3481;3482;3535;3536;3678;3679;4221;4222	172;173;174;175;176;395;396;397;398;652;653;654;655;656;718;719;720;721;722;723;724;725;1123;1565;1566;1567;2139;2140;2158;2159;2160;2161;2243;2244;2245;2246;2310;2311;2748;2749;3283;3284;3285;3286;3287;3288;3289;3290;3291;3292;3771;3772;3773;3774;3775;4157;4158;4584;4585;4586;4587;4867;4868;4869;4870;5161;5162;5163;5164;5242;5243;5485;5486;5487;5488;6295;6296;6297	176;398;653;724;1123;1565;2139;2160;2244;2311;2748;2749;3292;3775;4157;4584;4867;5164;5242;5487;6297		135;136;137;138			51;149;151;222
sp|P10664|RL4A_YEAST	sp|P10664|RL4A_YEAST	18	18	2	sp|P10664|RL4A_YEAST 60S ribosomal protein L4-A OS=Saccharomyces cerevisiae (strain ATCC 204508 / S288c) GN=RPL4A PE=1 SV=4	1	18	18	2	68.5	68.5	4.4	39.092	362	362	0	296.95	0.40255	0.90189	19.211	30	4	Leave out requantified	22800000000	16000000000	6780000000				128	64;205;404;716;832;1052;1053;1118;1371;1887;1950;2058;2167;2287;2423;2424;2657;2857	True;True;True;True;True;True;True;True;True;True;True;True;True;True;True;True;True;True	66;220;431;758;878;1110;1111;1183;1449;2023;2090;2207;2323;2324;2455;2596;2597;2852;3070	91;92;313;314;605;1045;1200;1531;1532;1533;1638;1639;1993;2746;2747;2748;2835;2993;2994;2995;3154;3155;3156;3346;3347;3542;3543;3544;3890;3891;4196;4197	140;141;142;143;474;475;476;902;903;1568;1569;1795;2292;2293;2294;2295;2296;2297;2298;2448;2449;2450;2451;2452;2453;2454;2455;2975;2976;2977;2978;4091;4092;4093;4094;4095;4225;4226;4443;4444;4445;4670;4671;4672;4673;4674;4675;4979;4980;5252;5253;5254;5255;5817;5818;5819;6252;6253;6254;6255;6256;6257;6258;6259;6260;6261	140;475;903;1568;1795;2293;2298;2450;2975;4095;4226;4444;4674;4980;5253;5255;5819;6259		139			93
sp|P10964|RPA1_YEAST	sp|P10964|RPA1_YEAST	6	6	6	sp|P10964|RPA1_YEAST DNA-directed RNA polymerase I subunit RPA190 OS=Saccharomyces cerevisiae (strain ATCC 204508 / S288c) GN=RPA190 PE=1 SV=2	1	6	6	6	5.7	5.7	5.7	186.43	1664	1664	0	41.248	0.39576	0.74257	31.714	6	2	Leave out requantified	156000000	102000000	53862000				129	846;1411;1512;1557;1776;2926	True;True;True;True;True;True	892;1491;1601;1651;1902;3144	1220;2052;2186;2252;2584;4299	1823;3076;3266;3364;3850;6400	1823;3076;3266;3364;3850;6400		140			424
sp|P11076|ARF1_YEAST	sp|P11076|ARF1_YEAST	8	8	2	sp|P11076|ARF1_YEAST ADP-ribosylation factor 1 OS=Saccharomyces cerevisiae (strain ATCC 204508 / S288c) GN=ARF1 PE=1 SV=3	1	8	8	2	52.5	52.5	13.3	20.529	181	181	0	71.767	0.37319	0.72827	6.2819	11	4	Leave out requantified	2740000000	1970000000	771000000				130	1085;1402;1414;1421;1683;1712;1866;1955	True;True;True;True;True;True;True;True	1145;1146;1482;1494;1502;1793;1833;2002;2095;2096	1579;1580;2043;2055;2056;2065;2433;2434;2492;2493;2719;2841;2842;2843	2356;2357;3065;3066;3079;3080;3081;3093;3619;3620;3710;3711;3712;4059;4234;4235;4236	2356;3065;3081;3093;3619;3712;4059;4234		141;142;143			22;110;134
sp|P11484|HSP75_YEAST	sp|P11484|HSP75_YEAST	30	1	1	sp|P11484|HSP75_YEAST Heat shock protein SSB1 OS=Saccharomyces cerevisiae (strain ATCC 204508 / S288c) GN=SSB1 PE=1 SV=3	1	30	1	1	57.9	2.1	2.1	66.601	613	613	0.002778	6.8745	0.65817	1.4438	NaN	1	0	Median	439000000	285000000	154000000				131	4;172;209;254;540;641;995;996;1051;1386;1451;1499;1595;1674;1709;1778;1834;1876;2022;2054;2211;2275;2303;2319;2326;2411;2417;2477;2667;2784	False;False;False;False;False;False;False;False;False;False;False;False;False;False;False;False;False;False;False;False;False;False;False;False;False;False;False;False;False;True	4;187;224;271;577;680;1051;1052;1109;1465;1537;1588;1689;1780;1829;1830;1904;1905;1969;2012;2169;2203;2370;2442;2472;2488;2495;2583;2589;2656;2862;2990	6;272;320;321;322;385;804;948;949;1446;1447;1448;1529;1530;2016;2017;2108;2172;2298;2415;2416;2487;2488;2586;2587;2588;2677;2678;2731;2732;2943;2989;3231;3232;3329;3372;3395;3403;3404;3525;3534;3624;3902;3903;4079	14;15;410;487;488;489;584;585;1209;1210;1415;1416;2162;2163;2164;2165;2166;2289;2290;2291;3012;3013;3014;3015;3148;3245;3246;3428;3593;3594;3595;3701;3702;3703;3704;3852;3853;3854;3855;3996;3997;3998;3999;4074;4075;4076;4376;4377;4434;4435;4795;4796;4956;5012;5013;5055;5064;5065;5066;5227;5240;5241;5403;5404;5835;5836;5837;5838;6088	14;410;487;585;1210;1415;2164;2165;2290;3012;3148;3246;3428;3595;3701;3852;3998;4076;4376;4434;4796;4956;5012;5055;5066;5227;5241;5403;5835;6088		144;145;146;147			129;470;471;522
sp|P11745|RNA1_YEAST	sp|P11745|RNA1_YEAST	1	1	1	sp|P11745|RNA1_YEAST Ran GTPase-activating protein 1 OS=Saccharomyces cerevisiae (strain ATCC 204508 / S288c) GN=RNA1 PE=1 SV=2	1	1	1	1	2	2	2	45.815	407	407	0.007317	5.8152	0.4037	0.74125	NaN	1	0	Median	22446000	14856000	7589400				132	668	TRUE	707	980	1464;1465	1464
sp|P11746|MCM1_YEAST	sp|P11746|MCM1_YEAST	2	2	2	sp|P11746|MCM1_YEAST Pheromone receptor transcription factor OS=Saccharomyces cerevisiae (strain ATCC 204508 / S288c) GN=MCM1 PE=1 SV=2	1	2	2	2	16.4	16.4	16.4	32.801	286	286	0	22.645	0.90824	1.7256	12.419	2	0	Median	369000000	192000000	177000000				133	647;2020	True;True	686;2167	955;2940	1425;1426;4372	1426;4372
sp|P12612|TCPA_YEAST	sp|P12612|TCPA_YEAST	5	5	5	sp|P12612|TCPA_YEAST T-complex protein 1 subunit alpha OS=Saccharomyces cerevisiae (strain ATCC 204508 / S288c) GN=TCP1 PE=1 SV=2	1	5	5	5	15.4	15.4	15.4	60.48	559	559	0	38.409	0.56681	1.0342	6.2994	7	1	Leave out requantified	211000000	108000000	102000000				134	469;947;1044;1688;2455	True;True;True;True;True	500;1001;1102;1801;2634	697;698;1380;1520;2445;3592;3593	1056;1057;1058;1059;2079;2278;3634;5350;5351	1056;2079;2278;3634;5350		148;149			52;179
sp|P12686|RT13_YEAST	sp|P12686|RT13_YEAST	1	1	1	sp|P12686|RT13_YEAST 37S ribosomal protein MRP13, mitochondrial OS=Saccharomyces cerevisiae (strain ATCC 204508 / S288c) GN=MRP13 PE=1 SV=2	1	1	1	1	4.4	4.4	4.4	38.988	339	339	0.002874	7.3044	0.43283	0.79663	NaN	1	1	Median	21707000	15642000	6064700				135	1821	TRUE	1956	2661	3975	3975
sp|P12695|ODP2_YEAST	sp|P12695|ODP2_YEAST	2	2	2	sp|P12695|ODP2_YEAST Dihydrolipoyllysine-residue acetyltransferase component of pyruvate dehydrogenase complex, mitochondrial OS=Saccharomyces cerevisiae (strain ATCC 204508 / S288c) GN=LAT1 PE=1 SV=1	1	2	2	2	4.4	4.4	4.4	51.817	482	482	0	13.316	0.57385	0.99894	NaN	1	0	Median	2058400	1256600	801770				136	1282;2547	True;True	1358;2734;2735	1872;3736;3737	2809;5588;5589	2809;5588		150			480
sp|P12904|AAKG_YEAST	sp|P12904|AAKG_YEAST	1	1	1	sp|P12904|AAKG_YEAST 5-AMP-activated protein kinase subunit gamma OS=Saccharomyces cerevisiae (strain ATCC 204508 / S288c) GN=SNF4 PE=1 SV=1	1	1	1	1	3.7	3.7	3.7	36.401	322	322	0.002976	8.3285	0.64381	1.1838	NaN	1	0	Median	13678000	7929600	5748100				137	1628	TRUE	1725	2347	3500	3500
sp|P13393|TBP_YEAST	sp|P13393|TBP_YEAST	1	1	1	sp|P13393|TBP_YEAST TATA-box-binding protein OS=Saccharomyces cerevisiae (strain ATCC 204508 / S288c) GN=SPT15 PE=1 SV=3	1	1	1	1	12.9	12.9	12.9	27.003	240	240	0.002882	7.3565	0.49395	0.91515	NaN	1	0	Median	8011400	5334900	2676600				138	16	TRUE	16	22	36;37	36
sp|P14020|DPM1_YEAST	sp|P14020|DPM1_YEAST	6	6	6	sp|P14020|DPM1_YEAST Dolichol-phosphate mannosyltransferase OS=Saccharomyces cerevisiae (strain ATCC 204508 / S288c) GN=DPM1 PE=1 SV=3	1	6	6	6	28.1	28.1	28.1	30.362	267	267	0	52.631	0.38865	0.73497	14.241	7	1	Leave out requantified	552000000	390000000	162000000				139	294;813;1391;1924;2184;2570	True;True;True;True;True;True	312;859;1470;2061;2062;2341;2760	442;1178;2024;2798;2799;3185;3766	670;671;1756;3025;4168;4169;4726;5633	670;1756;3025;4169;4726;5633		151			158
sp|P14065|GCY1_YEAST	sp|P14065|GCY1_YEAST	1	1	1	sp|P14065|GCY1_YEAST Glycerol 2-dehydrogenase (NADP(+)) OS=Saccharomyces cerevisiae (strain ATCC 204508 / S288c) GN=GCY1 PE=1 SV=1	1	1	1	1	4.2	4.2	4.2	35.079	312	312	0.007614	5.9965	1.379	2.5067	NaN	1	1	Median	47794000	22329000	25466000				140	207	TRUE	222	317	481	481
sp|P14120|RL30_YEAST	sp|P14120|RL30_YEAST	5	5	5	sp|P14120|RL30_YEAST 60S ribosomal protein L30 OS=Saccharomyces cerevisiae (strain ATCC 204508 / S288c) GN=RPL30 PE=1 SV=3	1	5	5	5	46.7	46.7	46.7	11.415	105	105	0	58.447	0.5003	0.97589	15.941	10	1	Leave out requantified	4670000000	3140000000	1530000000				141	1291;1453;2144;2274;2826	True;True;True;True;True	1367;1368;1539;2297;2298;2441;3037	1886;1887;1888;2110;3116;3117;3327;3328;4143;4144	2823;2824;2825;3150;3151;4619;4620;4621;4949;4950;4951;4952;4953;4954;4955;6180;6181;6182;6183	2824;3151;4621;4954;6180		152			61
sp|P14126|RL3_YEAST	sp|P14126|RL3_YEAST	26	26	26	sp|P14126|RL3_YEAST 60S ribosomal protein L3 OS=Saccharomyces cerevisiae (strain ATCC 204508 / S288c) GN=RPL3 PE=1 SV=4	1	26	26	26	57.6	57.6	57.6	43.757	387	387	0	298.06	0.38449	0.80008	22.295	48	6	Leave out requantified	19500000000	13300000000	6200000000				142	71;80;116;306;698;751;782;880;907;1206;1207;1292;1293;1731;1932;2212;2243;2244;2250;2444;2538;2567;2646;2713;2836;2856	True;True;True;True;True;True;True;True;True;True;True;True;True;True;True;True;True;True;True;True;True;True;True;True;True;True	75;76;86;126;324;739;796;827;928;929;959;1278;1279;1369;1370;1852;1853;2072;2371;2405;2406;2413;2621;2622;2724;2725;2756;2757;2841;2914;3048;3069	105;106;107;120;121;174;175;457;458;1022;1023;1099;1137;1273;1274;1317;1764;1765;1889;1890;1891;2522;2523;2810;3233;3234;3276;3277;3278;3279;3280;3290;3291;3575;3576;3721;3722;3723;3762;3763;3876;3877;3971;4159;4160;4193;4194;4195	164;165;166;185;186;187;188;266;267;268;690;691;692;1534;1535;1536;1642;1643;1692;1914;1915;1916;1986;1987;2642;2643;2644;2826;2827;2828;2829;2830;3747;3748;4183;4797;4798;4799;4800;4801;4858;4859;4860;4861;4862;4863;4864;4865;4866;4886;4887;4888;4889;5325;5326;5327;5328;5553;5554;5555;5556;5557;5627;5628;5629;5796;5797;5798;5933;5934;5935;6204;6205;6248;6249;6250;6251	164;187;266;691;1535;1642;1692;1915;1987;2642;2644;2826;2830;3747;4183;4798;4858;4866;4889;5325;5556;5629;5798;5933;6205;6248		153;154;155;156;157;158			53;214;261;308;323;380
sp|P14540|ALF_YEAST	sp|P14540|ALF_YEAST	8	8	8	sp|P14540|ALF_YEAST Fructose-bisphosphate aldolase OS=Saccharomyces cerevisiae (strain ATCC 204508 / S288c) GN=FBA1 PE=1 SV=3	1	8	8	8	31.2	31.2	31.2	39.62	359	359	0	99.585	0.42961	0.89735	14.44	10	4	Leave out requantified	1780000000	1250000000	530000000				143	374;620;736;791;861;2179;2270;2427	True;True;True;True;True;True;True;True	398;658;779;836;908;2336;2436;2602	556;914;915;1071;1072;1149;1244;3177;3321;3549;3550	832;1366;1367;1605;1606;1715;1716;1860;4714;4937;4938;5263;5264	832;1366;1606;1715;1860;4714;4938;5264
sp|P14693|SAM35_YEAST	sp|P14693|SAM35_YEAST	1	1	1	sp|P14693|SAM35_YEAST Sorting assembly machinery 35 kDa subunit OS=Saccharomyces cerevisiae (strain ATCC 204508 / S288c) GN=SAM35 PE=1 SV=2	1	1	1	1	5.5	5.5	5.5	37.404	329	329	0.007833	6.287	NaN	NaN	NaN	0	0	Median	23548000	23548000	0				144	1581	TRUE	1675	2282	3401	3401
sp|P14741|EI2BA_YEAST	sp|P14741|EI2BA_YEAST	1	1	1	sp|P14741|EI2BA_YEAST Translation initiation factor eIF-2B subunit alpha OS=Saccharomyces cerevisiae (strain ATCC 204508 / S288c) GN=GCN3 PE=1 SV=1	1	1	1	1	6.9	6.9	6.9	34.025	305	305	0.007792	6.2174	0.38164	0.70533	NaN	1	0	Median	4470400	3077600	1392800				145	790	TRUE	835	1148	1713;1714	1714
sp|P14742|GFA1_YEAST	sp|P14742|GFA1_YEAST	6	6	6	sp|P14742|GFA1_YEAST Glutamine--fructose-6-phosphate aminotransferase [isomerizing] OS=Saccharomyces cerevisiae (strain ATCC 204508 / S288c) GN=GFA1 PE=1 SV=4	1	6	6	6	11.4	11.4	11.4	80.046	717	717	0	46.66	0.32456	0.60373	22.249	6	3	Leave out requantified	331000000	180000000	150000000				146	224;429;648;2194;2226;2779	True;True;True;True;True;True	240;457;687;2353;2385;2984	347;641;956;3206;3251;4070	526;964;1427;4762;4822;6076	526;964;1427;4762;4822;6076		159			342
sp|P15108|HSC82_YEAST;sp|P02829|HSP82_YEAST	sp|P15108|HSC82_YEAST;sp|P02829|HSP82_YEAST	4;3	4;3	4;3	sp|P15108|HSC82_YEAST ATP-dependent molecular chaperone HSC82 OS=Saccharomyces cerevisiae (strain ATCC 204508 / S288c) GN=HSC82 PE=1 SV=4;sp|P02829|HSP82_YEAST ATP-dependent molecular chaperone HSP82 OS=Saccharomyces cerevisiae (strain ATCC 204508 / S288c)	2	4	4	4	5.5	5.5	5.5	80.899	705	705;709	0	23.645	0.40176	0.7316	8.5093	4	1	Leave out requantified	209000000	138000000	70925000				147	95;945;1473;2269	True;True;True;True	101;999;1560;2435	139;1377;2138;3320	213;2075;3194;4936	213;2075;3194;4936
sp|P15424|MS116_YEAST	sp|P15424|MS116_YEAST	4	4	4	sp|P15424|MS116_YEAST ATP-dependent RNA helicase MSS116, mitochondrial OS=Saccharomyces cerevisiae (strain ATCC 204508 / S288c) GN=MSS116 PE=1 SV=1	1	4	4	4	7.4	7.4	7.4	76.268	664	664	0	22.552	0.56017	1.0109	26.681	4	3	Median	104000000	65932000	38267000				148	314;709;993;1088	True;True;True;True	335;751;1049;1149	471;1038;1442;1585	706;1558;2157;2367	706;1558;2157;2367
sp|P15646|FBRL_YEAST	sp|P15646|FBRL_YEAST	5	5	5	sp|P15646|FBRL_YEAST rRNA 2-O-methyltransferase fibrillarin OS=Saccharomyces cerevisiae (strain ATCC 204508 / S288c) GN=NOP1 PE=1 SV=1	1	5	5	5	19.6	19.6	19.6	34.465	327	327	0	36.257	0.43866	0.80102	16.221	5	1	Leave out requantified	305000000	203000000	101000000				149	881;1039;1066;1322;1809	True;True;True;True;True	930;1097;1125;1399;1939	1275;1513;1552;1925;2634	1917;2268;2318;2871;3909;3910	1917;2268;2318;2871;3909		160			111
sp|P16140|VATB_YEAST	sp|P16140|VATB_YEAST	16	16	16	sp|P16140|VATB_YEAST V-type proton ATPase subunit B OS=Saccharomyces cerevisiae (strain ATCC 204508 / S288c) GN=VMA2 PE=1 SV=2	1	16	16	16	42.9	42.9	42.9	57.749	517	517	0	159.66	0.38998	0.72461	18.957	18	3	Leave out requantified	1940000000	1380000000	559000000				150	100;171;203;794;1072;1120;1193;1218;1340;1535;1587;1953;1974;2517;2544;2924	True;True;True;True;True;True;True;True;True;True;True;True;True;True;True;True	106;186;218;839;1131;1185;1265;1290;1417;1626;1681;2093;2118;2701;2731;3142	144;270;271;310;311;1153;1559;1641;1749;1782;1951;2218;2289;2839;2871;3692;3733;4297	224;408;409;471;472;1721;2326;2457;2458;2624;2678;2910;3310;3412;3413;4231;4274;5510;5511;5580;6397	224;408;471;1721;2326;2458;2624;2678;2910;3310;3412;4231;4274;5510;5580;6397
sp|P16474|GRP78_YEAST	sp|P16474|GRP78_YEAST	16	14	14	sp|P16474|GRP78_YEAST 78 kDa glucose-regulated protein homolog OS=Saccharomyces cerevisiae (strain ATCC 204508 / S288c) GN=KAR2 PE=1 SV=1	1	16	14	14	26.7	23.9	23.9	74.467	682	682	0	100.33	0.41068	0.78715	6.7116	14	4	Leave out requantified	1100000000	759000000	342000000				151	104;257;281;645;927;1155;1166;1451;1707;1841;1842;2394;2587;2636;2711;2778	True;False;True;True;True;True;True;False;True;True;True;True;True;True;True;True	110;274;299;684;980;1226;1237;1537;1826;1976;1977;2565;2777;2831;2912;2983	148;388;389;426;953;1352;1698;1710;2108;2483;2686;2687;3502;3787;3865;3969;4069	229;588;589;590;645;1423;2046;2544;2562;3148;3696;3697;4008;4009;5191;5192;5666;5783;5930;5931;6074;6075	229;590;645;1423;2046;2544;2562;3148;3697;4008;4009;5191;5666;5783;5930;6075		161			561
sp|P16521|EF3A_YEAST;sp|P53978|EF3B_YEAST	sp|P16521|EF3A_YEAST	30;9	30;9	30;9	sp|P16521|EF3A_YEAST Elongation factor 3A OS=Saccharomyces cerevisiae (strain ATCC 204508 / S288c) GN=YEF3 PE=1 SV=4	2	30	30	30	34.8	34.8	34.8	115.94	1044	1044;1044	0	219.12	0.43304	0.8194	23.204	36	8	Leave out requantified	10300000000	2640000000	7640000000				152	3;124;191;192;340;390;430;477;690;697;822;964;980;1179;1221;1624;1633;1693;1703;1706;1806;1913;1983;2109;2135;2257;2320;2499;2693;2879	True;True;True;True;True;True;True;True;True;True;True;True;True;True;True;True;True;True;True;True;True;True;True;True;True;True;True;True;True;True	3;134;206;207;364;416;458;508;731;738;868;1018;1036;1251;1293;1721;1731;1807;1821;1825;1936;2050;2127;2128;2260;2288;2421;2489;2681;2894;3093	4;5;186;296;297;298;513;586;587;642;706;1012;1021;1190;1402;1425;1728;1788;2342;2354;2453;2472;2482;2630;2785;2882;2883;3065;3105;3106;3300;3396;3397;3662;3940;4230	9;10;11;12;13;284;285;447;448;449;450;451;452;769;875;876;965;1071;1072;1073;1511;1532;1533;1779;2105;2134;2135;2593;2594;2688;3492;3509;3643;3668;3669;3695;3903;4150;4288;4289;4545;4607;4608;4609;4901;5056;5057;5058;5458;5889;5890;6310	12;285;447;452;769;876;965;1071;1511;1532;1779;2105;2134;2593;2688;3492;3509;3643;3669;3695;3903;4150;4288;4545;4607;4901;5057;5458;5889;6310		162;163;164;165;166;167;168;169;170;171			168;179;194;273;769;784;852;858;971;1001
sp|P16861|PFKA1_YEAST	sp|P16861|PFKA1_YEAST	9	9	9	sp|P16861|PFKA1_YEAST ATP-dependent 6-phosphofructokinase subunit alpha OS=Saccharomyces cerevisiae (strain ATCC 204508 / S288c) GN=PFK1 PE=1 SV=1	1	9	9	9	12.7	12.7	12.7	107.97	987	987	0	81.849	0.35548	0.64846	21.287	10	5	Leave out requantified	329000000	241000000	87466000				153	42;211;981;1126;1575;1743;2035;2365;2839	True;True;True;True;True;True;True;True;True	43;226;1037;1192;1669;1865;2182;2536;3051	57;324;325;1426;1650;2274;2537;2961;3461;4165	87;491;492;2136;2475;3390;3769;3770;4398;5138;6212	87;491;2136;2475;3390;3769;4398;5138;6212		172			220
sp|P16862|PFKA2_YEAST	sp|P16862|PFKA2_YEAST	3	3	3	sp|P16862|PFKA2_YEAST ATP-dependent 6-phosphofructokinase subunit beta OS=Saccharomyces cerevisiae (strain ATCC 204508 / S288c) GN=PFK2 PE=1 SV=4	1	3	3	3	2.9	2.9	2.9	104.62	959	959	0	18.009	0.30328	0.5464	26.535	3	0	Leave out requantified	61056000	42694000	18362000				154	198;1881;2150	True;True;True	213;2017;2304	305;2737;3125	464;4081;4629	464;4081;4629
sp|P17076|RL8A_YEAST	sp|P17076|RL8A_YEAST	18	4	4	sp|P17076|RL8A_YEAST 60S ribosomal protein L8-A OS=Saccharomyces cerevisiae (strain ATCC 204508 / S288c) GN=RPL8A PE=1 SV=4	1	18	4	4	59.4	12.5	12.5	28.124	256	256	0	37.387	0.30193	0.57526	59.849	5	3	Median	751000000	443000000	308000000				155	33;377;954;1427;1469;1642;1643;1669;1827;1862;1952;2213;2511;2573;2740;2882;2883;2938	False;True;False;False;False;False;False;True;False;False;False;False;False;False;False;True;True;False	34;401;1008;1509;1556;1740;1741;1774;1962;1998;2092;2372;2695;2763;2944;3096;3097;3157	44;45;561;562;1389;2073;2074;2133;2134;2364;2365;2366;2408;2668;2713;2714;2837;2838;3235;3681;3770;3771;4018;4233;4234;4235;4315	66;67;68;69;841;842;843;2092;3105;3106;3107;3189;3190;3521;3522;3523;3524;3525;3586;3985;4050;4051;4052;4053;4228;4229;4230;4802;5490;5491;5492;5638;5639;5640;5641;6007;6008;6314;6315;6316;6425	69;841;2092;3106;3189;3521;3524;3586;3985;4052;4230;4802;5490;5640;6007;6314;6316;6425		173			173
sp|P17255|VATA_YEAST	sp|P17255|VATA_YEAST	4	4	4	sp|P17255|VATA_YEAST V-type proton ATPase catalytic subunit A OS=Saccharomyces cerevisiae (strain ATCC 204508 / S288c) GN=VMA1 PE=1 SV=3	1	4	4	4	5.9	5.9	5.9	118.64	1071	1071	0	25.949	0.60594	1.0871	18.155	4	1	Leave out requantified	197000000	135000000	61836000				156	1331;2096;2644;2689	True;True;True;True	1408;2246;2839;2889	1940;3046;3874;3935	2895;4519;5794;5882	2895;4519;5794;5882
sp|P18239|ADT2_YEAST;sp|P18238|ADT3_YEAST	sp|P18239|ADT2_YEAST	11;2	11;2	10;1	sp|P18239|ADT2_YEAST ADP,ATP carrier protein 2 OS=Saccharomyces cerevisiae (strain ATCC 204508 / S288c) GN=PET9 PE=1 SV=2	2	11	11	10	34.3	34.3	30.5	34.426	318	318;307	0	82.265	0.34138	0.6459	11.585	12	1	Leave out requantified	1160000000	871000000	291000000				157	560;1158;1228;1490;2127;2302;2355;2375;2853;2862;2875	True;True;True;True;True;True;True;True;True;True;True	597;1229;1300;1301;1578;2280;2471;2526;2546;3066;3075;3089	830;831;1702;1798;1799;2158;3095;3371;3447;3474;4189;4205;4223	1249;1250;1251;2552;2553;2699;2700;2701;2702;3225;4593;4594;5010;5011;5121;5154;6243;6244;6274;6298;6299	1250;2553;2702;3225;4593;5010;5121;5154;6244;6274;6298		174			29
sp|P19073|CDC42_YEAST	sp|P19073|CDC42_YEAST	5	5	5	sp|P19073|CDC42_YEAST Cell division control protein 42 OS=Saccharomyces cerevisiae (strain ATCC 204508 / S288c) GN=CDC42 PE=1 SV=2	1	5	5	5	26.2	26.2	26.2	21.322	191	191	0	34.43	0.42715	0.80158	26.068	5	2	Leave out requantified	284000000	207000000	77020000				158	251;1567;1883;1884;2960	True;True;True;True;True	268;1661;2019;2020;3179	382;2264;2739;2740;4348	579;3378;4083;4084;6474	579;3378;4083;4084;6474
sp|P19097|FAS2_YEAST	sp|P19097|FAS2_YEAST	5	5	5	sp|P19097|FAS2_YEAST Fatty acid synthase subunit alpha OS=Saccharomyces cerevisiae (strain ATCC 204508 / S288c) GN=FAS2 PE=1 SV=2	1	5	5	5	3.9	3.9	3.9	206.94	1887	1887	0	41.842	0.50067	0.89444	21.139	5	1	Leave out requantified	167000000	101000000	66594000				159	472;842;943;1588;1979	True;True;True;True;True	503;888;996;1682;2123	701;1213;1370;2290;2877	1063;1814;2067;3414;4282	1063;1814;2067;3414;4282
sp|P19146|ARF2_YEAST	sp|P19146|ARF2_YEAST	7	1	1	sp|P19146|ARF2_YEAST ADP-ribosylation factor 2 OS=Saccharomyces cerevisiae (strain ATCC 204508 / S288c) GN=ARF2 PE=1 SV=3	1	7	1	1	44.8	5.5	5.5	20.657	181	181	1	-2	0.30565	0.59836	NaN	1	0	Median	82028000	63378000	18650000	#ERROR!			160	1085;1402;1414;1421;1683;1728;1955	False;False;False;False;False;True;False	1145;1146;1482;1494;1502;1793;1849;2095;2096	1579;1580;2043;2055;2056;2065;2433;2434;2517;2841;2842;2843	2356;2357;3065;3066;3079;3080;3081;3093;3619;3620;3739;4234;4235;4236	2356;3065;3081;3093;3619;3739;4234		141;142;143			22;110;134
sp|P19358|METK2_YEAST	sp|P19358|METK2_YEAST	22	22	11	sp|P19358|METK2_YEAST S-adenosylmethionine synthase 2 OS=Saccharomyces cerevisiae (strain ATCC 204508 / S288c) GN=SAM2 PE=1 SV=3	1	22	22	11	69.3	69.3	42.4	42.255	384	384	0	232.16	0.549	1.1641	21.379	40	4	Leave out requantified	17900000000	11100000000	6840000000				161	174;286;321;715;984;1030;1060;1253;1254;1372;1524;1744;1919;2118;2119;2221;2245;2378;2404;2418;2508;2874	True;True;True;True;True;True;True;True;True;True;True;True;True;True;True;True;True;True;True;True;True;True	189;304;342;757;1040;1087;1119;1328;1329;1450;1613;1614;1615;1866;2056;2270;2271;2380;2407;2549;2575;2590;2591;2692;3088	274;432;479;480;481;482;1044;1430;1431;1498;1499;1544;1545;1833;1834;1994;2200;2201;2202;2203;2204;2205;2538;2539;2792;3078;3079;3080;3245;3281;3282;3477;3478;3514;3515;3535;3536;3677;4221;4222	412;657;658;718;719;720;721;722;723;724;725;1565;1566;1567;2141;2142;2143;2243;2244;2245;2246;2310;2311;2748;2749;2979;2980;3283;3284;3285;3286;3287;3288;3289;3290;3291;3292;3771;3772;3773;3774;3775;4159;4160;4565;4566;4567;4568;4569;4816;4867;4868;4869;4870;5158;5159;5160;5213;5214;5215;5242;5243;5483;5484;6295;6296;6297	412;658;724;1565;2143;2244;2311;2748;2749;2980;3292;3775;4159;4565;4568;4816;4867;5158;5214;5242;5483;6297		135;136;137;138;175			53;127;151;153;224
sp|P19414|ACON_YEAST;sp|P39533|ACON2_YEAST	sp|P19414|ACON_YEAST;sp|P39533|ACON2_YEAST	1;1	1;1	1;1	sp|P19414|ACON_YEAST Aconitate hydratase, mitochondrial OS=Saccharomyces cerevisiae (strain ATCC 204508 / S288c) GN=ACO1 PE=1 SV=2;sp|P39533|ACON2_YEAST Homocitrate dehydratase, mitochondrial OS=Saccharomyces cerevisiae (strain ATCC 204508 / S288c) GN=ACO2	2	1	1	1	1.5	1.5	1.5	85.367	778	778;789	1	-2	NaN	NaN	NaN	0	0	Median	0	0	0	#ERROR!			162	2152	TRUE	2306	3128	4636	4636			26			694
sp|P19882|HSP60_YEAST	sp|P19882|HSP60_YEAST	3	3	3	sp|P19882|HSP60_YEAST Heat shock protein 60, mitochondrial OS=Saccharomyces cerevisiae (strain ATCC 204508 / S288c) GN=HSP60 PE=1 SV=1	1	3	3	3	6.1	6.1	6.1	60.751	572	572	0	23.751	0.37885	0.69012	9.4343	3	0	Leave out requantified	81694000	55342000	26352000				163	862;1429;1878	True;True;True	909;1511;2014	1245;2076;2734	1861;3109;4078	1861;3109;4078		176			135
sp|P20095|PRP2_YEAST	sp|P20095|PRP2_YEAST	1	1	1	sp|P20095|PRP2_YEAST Pre-mRNA-splicing factor ATP-dependent RNA helicase-like protein PRP2 OS=Saccharomyces cerevisiae (strain ATCC 204508 / S288c) GN=PRP2 PE=1 SV=1	1	1	1	1	1.4	1.4	1.4	99.812	876	876	0.002632	6.404	0.40122	0.6258	NaN	1	0	Median	766550	500980	265570				164	2453	TRUE	2632	3590	5348	5348
sp|P20436|RPAB3_YEAST	sp|P20436|RPAB3_YEAST	1	1	1	sp|P20436|RPAB3_YEAST DNA-directed RNA polymerases I, II, and III subunit RPABC3 OS=Saccharomyces cerevisiae (strain ATCC 204508 / S288c) GN=RPB8 PE=1 SV=1	1	1	1	1	8.2	8.2	8.2	16.511	146	146	0.003021	8.9757	0.76989	1.4164	NaN	1	1	Median	13342000	8545800	4796600				165	997	TRUE	1053	1449	2167	2167
sp|P20606|SAR1_YEAST	sp|P20606|SAR1_YEAST	3	3	3	sp|P20606|SAR1_YEAST Small COPII coat GTPase SAR1 OS=Saccharomyces cerevisiae (strain ATCC 204508 / S288c) GN=SAR1 PE=1 SV=1	1	3	3	3	23.2	23.2	23.2	21.45	190	190	0	27.919	0.4226	0.77056	18.18	3	1	Median	179000000	124000000	55267000				166	358;1353;2616	True;True;True	382;1431;2808	537;1969;3830	805;2939;5732	805;2939;5732
sp|P21147|ACO1_YEAST	sp|P21147|ACO1_YEAST	1	1	1	sp|P21147|ACO1_YEAST Acyl-CoA desaturase 1 OS=Saccharomyces cerevisiae (strain ATCC 204508 / S288c) GN=OLE1 PE=1 SV=2	1	1	1	1	1.8	1.8	1.8	58.402	510	510	0.002653	6.4906	3.5827	6.9618	NaN	1	1	Median	85782000	12582000	73200000				167	2056	TRUE	2205	2991	4437	4437
sp|P21560|CBP3_YEAST	sp|P21560|CBP3_YEAST	4	4	4	sp|P21560|CBP3_YEAST Protein CBP3, mitochondrial OS=Saccharomyces cerevisiae (strain ATCC 204508 / S288c) GN=CBP3 PE=1 SV=1	1	4	4	4	14	14	14	39.083	335	335	0	29.812	0.68232	1.2927	59.448	4	1	Leave out requantified	905000000	213000000	692000000				168	74;545;571;2409	True;True;True;True	79;582;608;2581	111;809;845;3522;3523	171;1217;1270;5223;5224	171;1217;1270;5223
sp|P22137|CLH_YEAST	sp|P22137|CLH_YEAST	4	4	4	sp|P22137|CLH_YEAST Clathrin heavy chain OS=Saccharomyces cerevisiae (strain ATCC 204508 / S288c) GN=CHC1 PE=1 SV=1	1	4	4	4	2.5	2.5	2.5	187.23	1653	1653	0	24.99	0.63433	1.1455	48.561	3	0	Leave out requantified	77270000	37979000	39292000				169	1379;1838;2131;2706	True;True;True;True	1457;1973;2284;2907	2005;2682;3100;3961	2997;2998;4004;4601;4602;5919	2997;4004;4602;5919
sp|P22336|RFA1_YEAST	sp|P22336|RFA1_YEAST	5	5	5	sp|P22336|RFA1_YEAST Replication factor A protein 1 OS=Saccharomyces cerevisiae (strain ATCC 204508 / S288c) GN=RFA1 PE=1 SV=1	1	5	5	5	9.5	9.5	9.5	70.347	621	621	0	34.758	0.64297	1.2139	60.898	5	0	Leave out requantified	406000000	216000000	190000000				170	12;2429;2510;2670;2864	True;True;True;True;True	12;2604;2694;2866;3077	17;3553;3680;3907;4207	30;5269;5489;5844;6276	30;5269;5489;5844;6276
sp|P23248|RS3A2_YEAST	sp|P23248|RS3A2_YEAST	21	21	5	sp|P23248|RS3A2_YEAST 40S ribosomal protein S1-B OS=Saccharomyces cerevisiae (strain ATCC 204508 / S288c) GN=RPS1B PE=1 SV=3	1	21	21	5	74.5	74.5	16.1	28.812	255	255	0	224.77	0.33498	0.69914	15.16	36	3	Leave out requantified	16300000000	12100000000	4190000000				171	156;289;466;604;637;948;1009;1230;1303;1459;1571;1724;1799;1800;2512;2681;2754;2800;2802;2803;2841	True;True;True;True;True;True;True;True;True;True;True;True;True;True;True;True;True;True;True;True;True	171;307;496;642;675;676;1002;1066;1303;1380;1545;1665;1845;1927;1928;1929;1930;2696;2880;2958;3008;3010;3011;3053	247;248;436;437;691;692;890;891;938;939;940;941;1381;1382;1466;1467;1801;1902;2117;2118;2269;2513;2618;2619;2620;2621;2622;3682;3683;3924;4036;4100;4102;4103;4104;4105;4168	373;374;375;662;663;664;1043;1044;1045;1046;1047;1331;1332;1333;1399;1400;1401;1402;1403;1404;1405;2080;2081;2082;2194;2195;2196;2704;2843;3161;3162;3163;3164;3384;3385;3735;3888;3889;3890;3891;3892;3893;3894;5493;5494;5495;5867;5868;6030;6031;6115;6116;6118;6119;6120;6121;6122;6123;6215	373;662;1046;1333;1401;2080;2194;2704;2843;3162;3384;3735;3888;3893;5494;5867;6031;6115;6120;6122;6215		177;178			103;229
sp|P23641|MPCP_YEAST	sp|P23641|MPCP_YEAST	3	3	3	sp|P23641|MPCP_YEAST Mitochondrial phosphate carrier protein OS=Saccharomyces cerevisiae (strain ATCC 204508 / S288c) GN=MIR1 PE=1 SV=1	1	3	3	3	14.1	14.1	14.1	32.812	311	311	0	25.518	0.3928	0.75153	3.2442	2	1	Median	207000000	158000000	48910000				172	152;176;1641	True;True;True	167;191;1739	243;276;2363	369;414;3520	369;414;3520
sp|P23900|FPS1_YEAST	sp|P23900|FPS1_YEAST	4	4	4	sp|P23900|FPS1_YEAST Glycerol uptake/efflux facilitator protein OS=Saccharomyces cerevisiae (strain ATCC 204508 / S288c) GN=FPS1 PE=1 SV=2	1	4	4	4	10.6	10.6	10.6	73.877	669	669	0	32.997	0.5911	1.1207	4.1246	6	1	Leave out requantified	268000000	161000000	106000000				173	125;195;2482;2525	True;True;True;True	135;210;2661;2710;2711	187;301;302;3632;3703;3704	286;455;456;457;458;5416;5529;5530	286;457;5416;5530		179			207
sp|P24000|RL24B_YEAST	sp|P24000|RL24B_YEAST	8	8	2	sp|P24000|RL24B_YEAST 60S ribosomal protein L24-B OS=Saccharomyces cerevisiae (strain ATCC 204508 / S288c) GN=RPL24B PE=1 SV=1	1	8	8	2	32.3	32.3	7.7	17.547	155	155	0	59.214	0.42577	0.91283	24.581	10	0	Leave out requantified	4010000000	2800000000	1220000000				174	168;793;982;1242;1679;1916;2224;2622	True;True;True;True;True;True;True;True	183;838;1038;1316;1786;2053;2383;2815	266;267;1151;1152;1427;1819;2423;2788;3249;3841	402;403;404;1718;1719;1720;2137;2138;2726;3604;3605;4154;4155;4820;5746	402;1719;2137;2726;3605;4154;4820;5746		180			1
sp|P24783|DBP2_YEAST	sp|P24783|DBP2_YEAST	20	19	19	sp|P24783|DBP2_YEAST ATP-dependent RNA helicase DBP2 OS=Saccharomyces cerevisiae (strain ATCC 204508 / S288c) GN=DBP2 PE=1 SV=1	1	20	19	19	39.6	37.5	37.5	60.999	546	546	0	159.44	0.6143	1.1586	20.395	23	4	Leave out requantified	3990000000	2540000000	1450000000				175	37;58;333;367;498;553;1255;1444;1681;1757;1861;1865;2037;2134;2267;2271;2351;2462;2789;2905	True;True;True;True;True;True;True;True;False;True;True;True;True;True;True;True;True;True;True;True	38;60;356;391;529;590;1330;1529;1530;1789;1790;1882;1997;2001;2185;2287;2433;2437;2438;2522;2641;2996;3120	51;83;84;500;501;548;735;818;1835;2099;2100;2426;2427;2428;2557;2711;2712;2718;2964;3104;3318;3322;3323;3443;3603;4086;4273	77;128;129;130;751;752;820;1122;1229;2750;3137;3138;3609;3610;3611;3612;3805;3806;4047;4048;4049;4057;4058;4401;4606;4934;4939;4940;4941;5114;5115;5116;5117;5369;5370;6096;6366	77;129;751;820;1122;1229;2750;3137;3609;3806;4049;4057;4401;4606;4934;4941;5115;5369;6096;6366		81;82;181;182;183;184			146;250;272;275;296;414
sp|P25340|ERG4_YEAST	sp|P25340|ERG4_YEAST	2	2	2	sp|P25340|ERG4_YEAST Delta(24(24(1)))-sterol reductase OS=Saccharomyces cerevisiae (strain ATCC 204508 / S288c) GN=ERG4 PE=1 SV=2	1	2	2	2	4.7	4.7	4.7	56.039	473	473	0	12.13	0.38923	0.71076	NaN	1	0	Median	24051000	17085000	6966000				176	889;2408	True;True	938;2580	1286;3521	1941;5221;5222	1941;5221
sp|P25390|SSK22_YEAST	sp|P25390|SSK22_YEAST	1	1	1	sp|P25390|SSK22_YEAST Serine/threonine-protein kinase SSK22 OS=Saccharomyces cerevisiae (strain ATCC 204508 / S288c) GN=SSK22 PE=1 SV=2	1	1	1	1	0.6	0.6	0.6	152.72	1331	1331	1	-2	NaN	NaN	NaN	0	0	Median	0	0	0	#ERROR!			177	752	TRUE	797	1100	1644	1644	1			169
sp|P25443|RS2_YEAST	sp|P25443|RS2_YEAST	14	14	14	sp|P25443|RS2_YEAST 40S ribosomal protein S2 OS=Saccharomyces cerevisiae (strain ATCC 204508 / S288c) GN=RPS2 PE=1 SV=3	1	14	14	14	59.8	59.8	59.8	27.449	254	254	0	190.35	0.35297	0.74301	13.17	25	2	Leave out requantified	15800000000	11500000000	4260000000				178	66;221;239;437;587;841;875;879;1157;1265;1497;1600;2100;2461	True;True;True;True;True;True;True;True;True;True;True;True;True;True	69;237;255;466;467;624;887;923;927;1228;1341;1585;1694;2251;2640	95;342;343;366;367;652;653;654;866;1211;1212;1265;1266;1271;1272;1700;1701;1847;1848;2167;2168;2307;3053;3054;3601;3602	149;519;520;521;553;554;555;556;557;558;979;980;981;982;983;984;985;986;1296;1810;1811;1812;1813;1901;1902;1903;1904;1905;1911;1912;1913;2547;2548;2549;2550;2551;2776;2777;3237;3238;3239;3240;3442;3443;3444;3445;4526;4527;4528;4529;5365;5366;5367;5368	149;519;554;979;1296;1811;1901;1912;2550;2777;3237;3442;4526;5368		185			81
sp|P25491|MAS5_YEAST	sp|P25491|MAS5_YEAST	8	8	8	sp|P25491|MAS5_YEAST Mitochondrial protein import protein MAS5 OS=Saccharomyces cerevisiae (strain ATCC 204508 / S288c) GN=YDJ1 PE=1 SV=1	1	8	8	8	27.1	27.1	27.1	44.67	409	409	0	54.127	0.3773	0.70091	16.89	9	2	Leave out requantified	776000000	565000000	212000000				179	696;727;728;758;893;1079;2645;2891	True;True;True;True;True;True;True;True	737;770;771;803;942;1138;1139;2840;3105	1020;1059;1060;1111;1292;1570;1571;3875;4246	1531;1591;1592;1659;1950;2345;2346;5795;6330	1531;1591;1592;1659;1950;2345;5795;6330		186			224
sp|P25515|VATL1_YEAST	sp|P25515|VATL1_YEAST	1	1	1	sp|P25515|VATL1_YEAST V-type proton ATPase subunit c OS=Saccharomyces cerevisiae (strain ATCC 204508 / S288c) GN=VMA3 PE=1 SV=1	1	1	1	1	11.2	11.2	11.2	16.35	160	160	0.007595	5.995	0.31433	0.5767	NaN	1	1	Median	49012000	36752000	12260000				180	2170	TRUE	2327	3159	4683	4683
sp|P25555|GBP2_YEAST	sp|P25555|GBP2_YEAST	1	1	1	sp|P25555|GBP2_YEAST Single-strand telomeric DNA-binding protein GBP2 OS=Saccharomyces cerevisiae (strain ATCC 204508 / S288c) GN=GBP2 PE=1 SV=1	1	1	1	1	2.8	2.8	2.8	48.728	427	427	0.002941	8.1814	0.63872	1.1788	NaN	1	0	Median	11550000	7170000	4380300				181	2129	TRUE	2282	3097	4596	4596
sp|P25567|SRO9_YEAST	sp|P25567|SRO9_YEAST	3	3	3	sp|P25567|SRO9_YEAST RNA-binding protein SRO9 OS=Saccharomyces cerevisiae (strain ATCC 204508 / S288c) GN=SRO9 PE=1 SV=2	1	3	3	3	10.1	10.1	10.1	48.059	434	434	0	16.615	0.53716	0.9285	12.11	3	1	Median	42686000	26699000	15987000				182	279;1556;2356	True;True;True	297;1650;2527	424;2251;3448	643;3363;5122	643;3363;5122		187			260
sp|P25605|ILV6_YEAST	sp|P25605|ILV6_YEAST	3	3	3	sp|P25605|ILV6_YEAST Acetolactate synthase small subunit, mitochondrial OS=Saccharomyces cerevisiae (strain ATCC 204508 / S288c) GN=ILV6 PE=1 SV=2	1	3	3	3	16.8	16.8	16.8	33.986	309	309	0	28.196	0.41561	0.79165	31.663	3	0	Leave out requantified	223000000	152000000	71213000				183	1627;1980;2796	True;True;True	1724;2124;3004	2346;2878;4096	3498;3499;4283;6109	3499;4283;6109
sp|P25694|CDC48_YEAST	sp|P25694|CDC48_YEAST	2	2	2	sp|P25694|CDC48_YEAST Cell division control protein 48 OS=Saccharomyces cerevisiae (strain ATCC 204508 / S288c) GN=CDC48 PE=1 SV=3	1	2	2	2	4.1	4.1	4.1	91.995	835	835	0	14.714	0.49908	0.9189	24.421	3	1	Median	36280000	23939000	12341000				184	2;1722	True;True	2;1843	2;3;2510	5;6;7;8;3730	7;3730
sp|P26321|RL5_YEAST	sp|P26321|RL5_YEAST	12	12	12	sp|P26321|RL5_YEAST 60S ribosomal protein L5 OS=Saccharomyces cerevisiae (strain ATCC 204508 / S288c) GN=RPL5 PE=1 SV=4	1	12	12	12	62.3	62.3	62.3	33.714	297	297	0	222.31	0.40329	0.82963	12.046	15	2	Leave out requantified	4780000000	3350000000	1430000000				185	24;290;551;552;692;742;860;876;956;1418;2352;2881	True;True;True;True;True;True;True;True;True;True;True;True	24;308;588;589;733;787;907;924;1010;1499;2523;3095	31;438;815;816;817;1014;1084;1085;1243;1267;1268;1391;2061;2062;3444;4232	48;49;665;1224;1225;1226;1227;1228;1514;1515;1516;1623;1624;1625;1626;1859;1906;1907;1908;2094;3086;3087;3088;3089;5118;6312;6313	49;665;1224;1227;1514;1625;1859;1908;2094;3087;5118;6312
sp|P26783|RS5_YEAST	sp|P26783|RS5_YEAST	14	14	14	sp|P26783|RS5_YEAST 40S ribosomal protein S5 OS=Saccharomyces cerevisiae (strain ATCC 204508 / S288c) GN=RPS5 PE=1 SV=3	1	14	14	14	59.1	59.1	59.1	25.038	225	225	0	123.3	0.4737	0.96004	13.527	25	4	Leave out requantified	20900000000	13900000000	7000000000				186	157;261;849;950;1210;1256;1612;1946;1947;2014;2077;2434;2731;2842	True;True;True;True;True;True;True;True;True;True;True;True;True;True	172;279;895;1004;1282;1331;1707;1708;1709;2086;2087;2161;2226;2611;2935;3054	249;394;395;396;1223;1385;1769;1836;2324;2325;2326;2327;2828;2829;2830;2831;2931;2932;3019;3563;4003;4004;4005;4169;4170	376;377;600;601;602;603;604;1826;1827;2087;2650;2751;2752;2753;2754;2755;2756;2757;2758;3467;3468;3469;3470;3471;3472;4215;4216;4217;4218;4219;4220;4221;4357;4358;4359;4360;4476;5307;5308;5983;5984;5985;6216;6217;6218	376;603;1826;2087;2650;2755;3467;4217;4221;4359;4476;5307;5984;6218		188;189			98;99
sp|P26784|RL16A_YEAST	sp|P26784|RL16A_YEAST	11	6	6	sp|P26784|RL16A_YEAST 60S ribosomal protein L16-A OS=Saccharomyces cerevisiae (strain ATCC 204508 / S288c) GN=RPL16A PE=1 SV=3	1	11	6	6	42.2	26.6	26.6	22.201	199	199	0	56.621	0.45045	0.9358	29.197	6	0	Leave out requantified	1190000000	787000000	402000000				187	35;1294;1320;1349;1599;1997;2088;2336;2578;2821;2869	True;True;False;True;False;True;False;True;True;False;False	36;1371;1397;1427;1693;2143;2237;2507;2768;3032;3083	48;1892;1923;1964;2305;2306;2904;3033;3420;3777;4132;4133;4213	72;2831;2869;2933;2934;3438;3439;3440;3441;4321;4504;5087;5088;5648;5649;6163;6164;6165;6286	72;2831;2869;2934;3438;4321;4504;5087;5648;6163;6286
sp|P26785|RL16B_YEAST	sp|P26785|RL16B_YEAST	14	14	9	sp|P26785|RL16B_YEAST 60S ribosomal protein L16-B OS=Saccharomyces cerevisiae (strain ATCC 204508 / S288c) GN=RPL16B PE=1 SV=3	1	14	14	9	51.5	51.5	35.9	22.249	198	198	0	97.037	0.37482	0.79254	31.019	20	0	Leave out requantified	7050000000	5050000000	2000000000				188	32;1011;1012;1310;1320;1348;1599;2043;2088;2093;2279;2763;2821;2869	True;True;True;True;True;True;True;True;True;True;True;True;True;True	33;1068;1069;1387;1397;1426;1693;2192;2237;2242;2446;2968;3032;3083	43;1471;1472;1473;1911;1912;1923;1963;2305;2306;2974;2975;3033;3040;3041;3334;3335;4050;4132;4133;4213	64;65;2200;2201;2202;2203;2204;2855;2856;2857;2869;2932;3438;3439;3440;3441;4412;4413;4414;4504;4512;4513;4514;4964;4965;4966;6050;6051;6163;6164;6165;6286	64;2201;2204;2855;2869;2932;3438;4413;4504;4514;4964;6051;6163;6286
sp|P26786|RS7A_YEAST	sp|P26786|RS7A_YEAST	10	10	5	sp|P26786|RS7A_YEAST 40S ribosomal protein S7-A OS=Saccharomyces cerevisiae (strain ATCC 204508 / S288c) GN=RPS7A PE=1 SV=4	1	10	10	5	61.1	61.1	39.5	21.622	190	190	0	82.544	0.45004	0.92286	11.984	15	1	Leave out requantified	4860000000	3280000000	1580000000				189	39;107;361;463;952;1077;1092;1384;2478;2917	True;True;True;True;True;True;True;True;True;True	40;114;385;493;1006;1136;1153;1463;2657;3133	53;153;540;541;688;1387;1567;1568;1589;1590;2013;2014;3625;3626;4286	79;80;235;236;808;809;810;811;1040;2089;2090;2341;2342;2343;2373;2374;2375;3007;3008;3009;3010;5405;5406;5407;5408;6382	80;235;810;1040;2089;2342;2373;3009;5406;6382
sp|P27476|NSR1_YEAST	sp|P27476|NSR1_YEAST	14	14	14	sp|P27476|NSR1_YEAST Nuclear localization sequence-binding protein OS=Saccharomyces cerevisiae (strain ATCC 204508 / S288c) GN=NSR1 PE=1 SV=1	1	14	14	14	36.5	36.5	36.5	44.535	414	414	0	141.07	0.21524	0.40409	72.336	17	5	Leave out requantified	1460000000	1150000000	307000000				190	96;109;258;431;462;764;904;1127;1223;1289;1602;1864;1927;2137	True;True;True;True;True;True;True;True;True;True;True;True;True;True	102;117;275;459;492;809;955;1193;1295;1365;1696;2000;2067;2290	140;158;159;390;643;644;686;687;1118;1311;1651;1791;1881;2309;2716;2717;2804;3108	214;215;216;217;218;219;243;244;591;966;967;1038;1039;1669;1980;2476;2692;2818;3447;4055;4056;4175;4611	219;244;591;967;1038;1669;1980;2476;2692;2818;3447;4055;4175;4611		190;191			229;243
sp|P27801|PEP3_YEAST	sp|P27801|PEP3_YEAST	2	2	2	sp|P27801|PEP3_YEAST Vacuolar membrane protein PEP3 OS=Saccharomyces cerevisiae (strain ATCC 204508 / S288c) GN=PEP3 PE=1 SV=1	1	2	2	2	2.6	2.6	2.6	107.4	918	918	0	11.316	0.79132	1.8134	NaN	1	0	Median	528000000	286000000	242000000				191	2439;2674	True;True	2616;2871	3569;3912	5317;5852;5853	5317;5852			27;28			747;757
sp|P27895|CIN8_YEAST	sp|P27895|CIN8_YEAST	19	19	19	sp|P27895|CIN8_YEAST Kinesin-like protein CIN8 OS=Saccharomyces cerevisiae (strain ATCC 204508 / S288c) GN=CIN8 PE=1 SV=3	1	19	19	19	24.3	24.3	24.3	113.31	1000	1000	0	177.42	0.24478	0.46497	199.65	10	9	Median	982000000	872000000	110000000				192	478;576;680;882;1388;1456;1767;1801;1817;1849;2209;2235;2290;2291;2330;2393;2487;2675;2787	True;True;True;True;True;True;True;True;True;True;True;True;True;True;True;True;True;True;True	509;613;721;931;1467;1542;1893;1931;1952;1984;2368;2395;2458;2459;2500;2564;2669;2872;2994	707;850;999;1276;2020;2114;2568;2623;2656;2695;3228;3263;3352;3353;3409;3501;3645;3646;3913;4084	1074;1276;1493;1918;3021;3157;3823;3895;3966;4022;4792;4839;4986;4987;5073;5190;5434;5435;5854;6094	1074;1276;1493;1918;3021;3157;3823;3895;3966;4022;4792;4839;4986;4987;5073;5190;5435;5854;6094		192;193;194;195;196			84;737;792;856;863
sp|P28007|GAR1_YEAST	sp|P28007|GAR1_YEAST	1	1	1	sp|P28007|GAR1_YEAST H/ACA ribonucleoprotein complex subunit 1 OS=Saccharomyces cerevisiae (strain ATCC 204508 / S288c) GN=GAR1 PE=1 SV=1	1	1	1	1	7.8	7.8	7.8	21.48	205	205	0.00277	6.8662	0.3711	0.6867	NaN	1	0	Median	5807000	4194100	1612900				193	2595	TRUE	2785	3800	5686;5687	5686
sp|P28241|IDH2_YEAST	sp|P28241|IDH2_YEAST	3	3	3	sp|P28241|IDH2_YEAST Isocitrate dehydrogenase [NAD] subunit 2, mitochondrial OS=Saccharomyces cerevisiae (strain ATCC 204508 / S288c) GN=IDH2 PE=1 SV=1	1	3	3	3	13	13	13	39.739	369	369	0	22.285	0.29816	0.5751	30.417	3	1	Median	175000000	137000000	38003000				194	539;611;2230	True;True;True	576;649;2389	803;901;3256	1208;1348;4830	1208;1348;4830
sp|P29311|BMH1_YEAST;sp|P34730|BMH2_YEAST	sp|P29311|BMH1_YEAST;sp|P34730|BMH2_YEAST	3;3	3;3	3;3	sp|P29311|BMH1_YEAST Protein BMH1 OS=Saccharomyces cerevisiae (strain ATCC 204508 / S288c) GN=BMH1 PE=1 SV=4;sp|P34730|BMH2_YEAST Protein BMH2 OS=Saccharomyces cerevisiae (strain ATCC 204508 / S288c) GN=BMH2 PE=1 SV=3	2	3	3	3	15.4	15.4	15.4	30.091	267	267;273	0	30.29	0.57386	1.0866	7.784	3	1	Median	175000000	114000000	61730000				195	346;1134;1175	True;True;True	370;1202;1247	521;1661;1723	781;2487;2488;2586	781;2487;2586
sp|P29453|RL8B_YEAST	sp|P29453|RL8B_YEAST	18	18	4	sp|P29453|RL8B_YEAST 60S ribosomal protein L8-B OS=Saccharomyces cerevisiae (strain ATCC 204508 / S288c) GN=RPL8B PE=1 SV=3	1	18	18	4	59.4	59.4	12.5	28.111	256	256	0	158.73	0.31654	0.69275	18.401	29	6	Leave out requantified	13500000000	9830000000	3670000000				196	33;376;954;1427;1469;1642;1643;1668;1827;1862;1952;2213;2511;2573;2740;2884;2885;2938	True;True;True;True;True;True;True;True;True;True;True;True;True;True;True;True;True;True	34;400;1008;1509;1556;1740;1741;1772;1773;1962;1998;2092;2372;2695;2763;2944;3098;3099;3157	44;45;559;560;1389;2073;2074;2133;2134;2364;2365;2366;2406;2407;2668;2713;2714;2837;2838;3235;3681;3770;3771;4018;4236;4237;4238;4239;4315	66;67;68;69;837;838;839;840;2092;3105;3106;3107;3189;3190;3521;3522;3523;3524;3525;3583;3584;3585;3985;4050;4051;4052;4053;4228;4229;4230;4802;5490;5491;5492;5638;5639;5640;5641;6007;6008;6317;6318;6319;6320;6321;6425	69;839;2092;3106;3189;3521;3524;3583;3985;4052;4230;4802;5490;5640;6007;6319;6321;6425		197			173
sp|P29496|MCM5_YEAST	sp|P29496|MCM5_YEAST	1	1	1	sp|P29496|MCM5_YEAST Minichromosome maintenance protein 5 OS=Saccharomyces cerevisiae (strain ATCC 204508 / S288c) GN=MCM5 PE=1 SV=1	1	1	1	1	2.7	2.7	2.7	86.41	775	775	0.002865	7.1915	0.29338	0.49623	28.854	2	0	Median	4052300	3217000	835370				197	1574	TRUE	1668	2272;2273	3388;3389	3388
sp|P30624|LCF1_YEAST;sp|P39002|LCF3_YEAST	sp|P30624|LCF1_YEAST	7;1	7;1	7;1	sp|P30624|LCF1_YEAST Long-chain-fatty-acid--CoA ligase 1 OS=Saccharomyces cerevisiae (strain ATCC 204508 / S288c) GN=FAA1 PE=1 SV=1	2	7	7	7	12	12	12	77.865	700	700;694	0	47.898	0.42117	0.7803	11.739	7	1	Leave out requantified	237000000	161000000	75723000				198	15;91;714;789;1194;2410;2577	True;True;True;True;True;True;True	15;97;756;834;1266;2582;2767	21;135;1043;1147;1750;3524;3776	35;208;1564;1712;2625;5225;5226;5647	35;208;1564;1712;2625;5225;5647
sp|P31377|STX8_YEAST	sp|P31377|STX8_YEAST	1	1	1	sp|P31377|STX8_YEAST Syntaxin-8 OS=Saccharomyces cerevisiae (strain ATCC 204508 / S288c) GN=SYN8 PE=1 SV=2	1	1	1	1	4.3	4.3	4.3	29.048	255	255	0.002933	7.7992	0.73147	1.3442	NaN	1	0	Median	28421000	16884000	11537000				199	1993	TRUE	2139	2899	4316	4316
sp|P32074|COPG_YEAST	sp|P32074|COPG_YEAST	39	39	39	sp|P32074|COPG_YEAST Coatomer subunit gamma OS=Saccharomyces cerevisiae (strain ATCC 204508 / S288c) GN=SEC21 PE=1 SV=2	1	39	39	39	51.2	51.2	51.2	104.83	935	935	0	323.31	0.040897	0.085361	138.28	41	37	Leave out requantified	9380000000	8780000000	592000000				200	21;98;193;327;360;447;524;646;649;900;941;969;970;1046;1047;1082;1144;1165;1178;1231;1236;1283;1400;1466;1471;1495;1598;1734;1780;1785;1846;1850;1921;1949;2091;2146;2147;2814;2849	True;True;True;True;True;True;True;True;True;True;True;True;True;True;True;True;True;True;True;True;True;True;True;True;True;True;True;True;True;True;True;True;True;True;True;True;True;True;True	21;104;208;349;384;477;557;558;685;688;950;951;994;1025;1026;1104;1105;1142;1213;1236;1250;1304;1309;1310;1359;1480;1553;1558;1583;1692;1856;1907;1913;1981;1985;2058;2089;2240;2300;2301;3024;3062	27;142;299;491;539;666;772;773;774;775;776;954;957;1304;1305;1306;1367;1411;1412;1413;1414;1522;1523;1576;1677;1678;1709;1726;1727;1802;1809;1810;1873;1874;2038;2039;2129;2136;2164;2303;2304;2527;2590;2599;2692;2696;2795;2833;2834;3036;3037;3121;3122;4123;4182;4183	43;222;453;738;807;1004;1168;1169;1170;1171;1172;1424;1428;1967;1968;1969;1970;1971;2064;2119;2120;2121;2122;2280;2281;2352;2514;2515;2561;2591;2592;2705;2712;2713;2810;2811;3057;3058;3059;3181;3192;3234;3436;3437;3754;3857;3867;4018;4023;4165;4223;4224;4507;4508;4625;4626;6150;6235;6236;6237	43;222;453;738;807;1004;1168;1424;1428;1971;2064;2120;2122;2280;2281;2352;2515;2561;2591;2705;2713;2811;3059;3181;3192;3234;3436;3754;3857;3867;4018;4023;4165;4224;4507;4625;4626;6150;6237		198;199;200;201;202			101;107;237;334;614
sp|P32263|P5CR_YEAST	sp|P32263|P5CR_YEAST	1	1	1	sp|P32263|P5CR_YEAST Pyrroline-5-carboxylate reductase OS=Saccharomyces cerevisiae (strain ATCC 204508 / S288c) GN=PRO3 PE=1 SV=1	1	1	1	1	12.2	12.2	12.2	30.131	286	286	0	15.48	0.56263	1.0615	NaN	1	0	Median	52928000	35192000	17737000				201	2619	TRUE	2811	3834	5736	5736
sp|P32266|MGM1_YEAST	sp|P32266|MGM1_YEAST	2	2	2	sp|P32266|MGM1_YEAST Dynamin-like GTPase MGM1, mitochondrial OS=Saccharomyces cerevisiae (strain ATCC 204508 / S288c) GN=MGM1 PE=1 SV=3	1	2	2	2	3.7	3.7	3.7	99.177	881	881	0.003077	10.669	0.4571	0.88667	10.773	2	1	Median	699000000	493000000	205000000				202	1742;2914	True;True	1864;3130	2536;4283	3768;6379	3768;6379
sp|P32316|ACH1_YEAST	sp|P32316|ACH1_YEAST	27	27	27	sp|P32316|ACH1_YEAST Acetyl-CoA hydrolase OS=Saccharomyces cerevisiae (strain ATCC 204508 / S288c) GN=ACH1 PE=1 SV=2	1	27	27	27	65.6	65.6	65.6	58.711	526	526	0	265.81	0.46715	0.99668	12.626	45	7	Leave out requantified	23100000000	15400000000	7730000000				203	47;82;153;213;231;240;241;331;387;413;654;683;932;1075;1076;1278;1430;1684;1762;2283;2442;2603;2604;2671;2686;2791;2829	True;True;True;True;True;True;True;True;True;True;True;True;True;True;True;True;True;True;True;True;True;True;True;True;True;True;True	49;88;168;229;247;256;257;258;353;354;413;441;693;724;985;1134;1135;1354;1512;1513;1794;1795;1887;2450;2451;2619;2793;2794;2795;2867;2868;2886;2998;2999;3040;3041	66;67;123;124;244;330;355;368;369;370;496;497;498;582;583;617;963;964;1002;1357;1565;1566;1868;2077;2078;2435;2436;2437;2562;3340;3341;3572;3573;3810;3811;3812;3813;3814;3908;3909;3930;3931;4088;4089;4090;4148;4149;4150	102;103;104;190;191;192;370;497;498;499;538;559;560;561;562;744;745;746;747;748;868;869;870;871;921;922;1437;1438;1439;1440;1496;2052;2338;2339;2340;2802;2803;2804;3110;3111;3112;3621;3622;3623;3814;3815;4971;4972;4973;4974;5320;5321;5322;5700;5701;5702;5703;5704;5705;5706;5845;5846;5847;5848;5874;5875;5876;6098;6099;6100;6101;6188;6189;6190;6191;6192	104;192;370;498;538;560;561;746;868;922;1437;1496;2052;2339;2340;2803;3112;3621;3815;4973;5322;5702;5706;5847;5876;6098;6189		203;204;205;206;207;208;209;210;211			89;120;194;233;246;359;368;390;430
sp|P32324|EF2_YEAST	sp|P32324|EF2_YEAST	9	9	9	sp|P32324|EF2_YEAST Elongation factor 2 OS=Saccharomyces cerevisiae (strain ATCC 204508 / S288c) GN=EFT1 PE=1 SV=1	1	9	9	9	14.8	14.8	14.8	93.288	842	842	0	71.207	0.53621	0.98864	19.347	9	2	Leave out requantified	514000000	322000000	192000000				204	40;60;414;446;713;1403;1651;2568;2772	True;True;True;True;True;True;True;True;True	41;62;442;476;755;1483;1749;2758;2977	54;86;618;665;1042;2044;2376;3764;4060	81;133;923;1003;1563;3067;3538;5630;6062;6063	81;133;923;1003;1563;3067;3538;5630;6062		212;213			9;681
sp|P32342|SRP21_YEAST	sp|P32342|SRP21_YEAST	1	1	1	sp|P32342|SRP21_YEAST Signal recognition particle subunit SRP21 OS=Saccharomyces cerevisiae (strain ATCC 204508 / S288c) GN=SRP21 PE=1 SV=3	1	1	1	1	11.4	11.4	11.4	18.425	167	167	0.007752	6.136	0.29889	0.50961	NaN	1	0	Median	1747000	1414100	332900				205	2193	TRUE	2352	3205	4761	4761
sp|P32347|DCUP_YEAST	sp|P32347|DCUP_YEAST	3	3	3	sp|P32347|DCUP_YEAST Uroporphyrinogen decarboxylase OS=Saccharomyces cerevisiae (strain ATCC 204508 / S288c) GN=HEM12 PE=1 SV=1	1	3	3	3	7.2	7.2	7.2	41.349	362	362	0	16.794	1.2085	2.3867	29.411	3	1	Plateau	223000000	104000000	120000000				206	502;2618;2908	True;True;True	533;2810;3123	741;3833;4276	1129;5735;6369	1129;5735;6369		214			29
sp|P32353|ERG3_YEAST	sp|P32353|ERG3_YEAST	5	5	5	sp|P32353|ERG3_YEAST Delta(7)-sterol 5(6)-desaturase OS=Saccharomyces cerevisiae (strain ATCC 204508 / S288c) GN=ERG3 PE=1 SV=1	1	5	5	5	16.7	16.7	16.7	42.73	365	365	0	29.967	0.07541	0.14213	48.932	4	4	Median	151000000	141000000	10092000				207	590;591;1662;2071;2708	True;True;True;True;True	627;628;1763;2220;2909	870;871;2395;3010;3963	1301;1302;3569;4466;5922	1301;1302;3569;4466;5922		215			1
sp|P32368|SAC1_YEAST	sp|P32368|SAC1_YEAST	5	5	5	sp|P32368|SAC1_YEAST Phosphoinositide phosphatase SAC1 OS=Saccharomyces cerevisiae (strain ATCC 204508 / S288c) GN=SAC1 PE=1 SV=1	1	5	5	5	12.4	12.4	12.4	71.124	623	623	0	32.807	0.27065	0.49748	39.439	4	2	Median	114000000	90498000	23220000				208	450;854;2420;2492;2540	True;True;True;True;True	480;900;2593;2674;2727	669;1231;3538;3653;3727	1008;1842;5246;5445;5561	1008;1842;5246;5445;5561
sp|P32466|HXT3_YEAST	sp|P32466|HXT3_YEAST	2	2	2	sp|P32466|HXT3_YEAST Low-affinity glucose transporter HXT3 OS=Saccharomyces cerevisiae (strain ATCC 204508 / S288c) GN=HXT3 PE=1 SV=1	1	2	2	2	6.2	6.2	6.2	62.557	567	567	0	11.706	0.6336	1.2031	11.222	2	2	Median	83280000	53211000	30069000				209	2574;2916	True;True	2764;3132	3772;4285	5642;6381	5642;6381
sp|P32473|ODPB_YEAST	sp|P32473|ODPB_YEAST	2	2	2	sp|P32473|ODPB_YEAST Pyruvate dehydrogenase E1 component subunit beta, mitochondrial OS=Saccharomyces cerevisiae (strain ATCC 204508 / S288c) GN=PDB1 PE=1 SV=2	1	2	2	2	7.4	7.4	7.4	40.053	366	366	0	12.955	0.51465	0.93731	38.629	2	0	Median	96111000	50578000	45533000				210	503;2197	True;True	534;2356	742;3210	1130;4767	1130;4767
sp|P32476|ERG1_YEAST	sp|P32476|ERG1_YEAST	1	1	1	sp|P32476|ERG1_YEAST Squalene monooxygenase OS=Saccharomyces cerevisiae (strain ATCC 204508 / S288c) GN=ERG1 PE=1 SV=2	1	1	1	1	2.2	2.2	2.2	55.125	496	496	0.00266	6.4931	0.42673	0.82492	NaN	1	0	Median	88506000	59997000	28508000				211	1781	TRUE	1908	2591	3858	3858
sp|P32481|IF2G_YEAST	sp|P32481|IF2G_YEAST	1	1	1	sp|P32481|IF2G_YEAST Eukaryotic translation initiation factor 2 subunit gamma OS=Saccharomyces cerevisiae (strain ATCC 204508 / S288c) GN=GCD11 PE=1 SV=1	1	1	1	1	1.5	1.5	1.5	57.865	527	527	0.002801	6.9286	0.306	0.5514	NaN	1	0	Median	36230000	27402000	8828100				212	953	TRUE	1007	1388	2091	2091
sp|P32486|KRE6_YEAST	sp|P32486|KRE6_YEAST	2	2	2	sp|P32486|KRE6_YEAST Beta-glucan synthesis-associated protein KRE6 OS=Saccharomyces cerevisiae (strain ATCC 204508 / S288c) GN=KRE6 PE=1 SV=2	1	2	2	2	4.3	4.3	4.3	80.122	720	720	0	16.419	0.69017	1.3155	10.429	2	1	Median	232000000	134000000	98097000				213	1585;2518	True;True	1679;2702	2287;3693	3409;5512	3409;5512
sp|P32497|EIF3C_YEAST	sp|P32497|EIF3C_YEAST	4	4	4	sp|P32497|EIF3C_YEAST Eukaryotic translation initiation factor 3 subunit C OS=Saccharomyces cerevisiae (strain ATCC 204508 / S288c) GN=NIP1 PE=1 SV=2	1	4	4	4	5.7	5.7	5.7	93.203	812	812	0	28.798	0.22027	0.40401	25.654	4	2	Median	108000000	88743000	19437000				214	373;1143;2561;2804	True;True;True;True	397;1212;2750;3012	555;1676;3754;4106;4107	831;2513;5617;6124;6125;6126	831;2513;5617;6126
sp|P32563|VPH1_YEAST	sp|P32563|VPH1_YEAST	1	1	1	sp|P32563|VPH1_YEAST V-type proton ATPase subunit a, vacuolar isoform OS=Saccharomyces cerevisiae (strain ATCC 204508 / S288c) GN=VPH1 PE=1 SV=3	1	1	1	1	2.7	2.7	2.7	95.528	840	840	0.002985	8.5991	0.52424	0.95429	NaN	1	1	Median	17827000	11239000	6588100				215	1417	TRUE	1498	2060	3085	3085
sp|P32565|RPN2_YEAST	sp|P32565|RPN2_YEAST	4	4	4	sp|P32565|RPN2_YEAST 26S proteasome regulatory subunit RPN2 OS=Saccharomyces cerevisiae (strain ATCC 204508 / S288c) GN=RPN2 PE=1 SV=4	1	4	4	4	5	5	5	104.23	945	945	0	27.345	0.61446	1.1605	7.9742	4	1	Leave out requantified	186000000	114000000	71557000				216	838;1364;1940;2242	True;True;True;True	884;1442;2080;2404	1208;1985;2820;3275	1807;2964;4196;4854;4855;4856;4857	1807;2964;4196;4856		216			662
sp|P32573|SPS19_YEAST	sp|P32573|SPS19_YEAST	5	5	5	sp|P32573|SPS19_YEAST Peroxisomal 2,4-dienoyl-CoA reductase SPS19 OS=Saccharomyces cerevisiae (strain ATCC 204508 / S288c) GN=SPS19 PE=1 SV=4	1	5	5	5	22.9	22.9	22.9	31.109	292	292	0	36.809	0.62597	1.1784	22.341	5	1	Leave out requantified	432000000	263000000	170000000				217	721;1746;1791;2254;2346	True;True;True;True;True	764;1869;1919;2418;2517	1052;2542;2608;3296;3435	1583;3778;3779;3876;4895;5104	1583;3778;3876;4895;5104
sp|P32582|CBS_YEAST	sp|P32582|CBS_YEAST	2	2	2	sp|P32582|CBS_YEAST Cystathionine beta-synthase OS=Saccharomyces cerevisiae (strain ATCC 204508 / S288c) GN=CYS4 PE=1 SV=1	1	2	2	2	5.7	5.7	5.7	56.021	507	507	0	16.754	0.39344	0.71931	21.166	3	2	Median	82514000	57050000	25463000				218	218;1580	True;True	234;1674	339;2280;2281	516;3399;3400	516;3399
sp|P32589|HSP7F_YEAST;sp|P32590|HSP79_YEAST	sp|P32589|HSP7F_YEAST	8;2	8;2	8;2	sp|P32589|HSP7F_YEAST Heat shock protein homolog SSE1 OS=Saccharomyces cerevisiae (strain ATCC 204508 / S288c) GN=SSE1 PE=1 SV=4	2	8	8	8	16	16	16	77.365	693	693;693	0	56.65	0.57609	1.1155	19.771	8	2	Leave out requantified	505000000	297000000	208000000				219	423;733;1045;1267;2026;2325;2386;2775	True;True;True;True;True;True;True;True	451;776;1103;1343;2173;2494;2557;2980	633;1067;1521;1852;2949;3402;3491;4065	952;1600;2279;2782;4384;5063;5178;6069	952;1600;2279;2782;4384;5063;5178;6069
sp|P32657|CHD1_YEAST	sp|P32657|CHD1_YEAST	1	1	1	sp|P32657|CHD1_YEAST Chromo domain-containing protein 1 OS=Saccharomyces cerevisiae (strain ATCC 204508 / S288c) GN=CHD1 PE=1 SV=1	1	1	1	1	1.2	1.2	1.2	168.24	1468	1468	1	-2	NaN	NaN	NaN	0	0	Median	0	0	0	#ERROR!			220	2395	TRUE	2566	3503	5193;5194	5194			3;29			610;619
sp|P32835|GSP1_YEAST;sp|P32836|GSP2_YEAST	sp|P32835|GSP1_YEAST;sp|P32836|GSP2_YEAST	9;8	9;8	9;8	sp|P32835|GSP1_YEAST GTP-binding nuclear protein GSP1/CNR1 OS=Saccharomyces cerevisiae (strain ATCC 204508 / S288c) GN=GSP1 PE=1 SV=1;sp|P32836|GSP2_YEAST GTP-binding nuclear protein GSP2/CNR2 OS=Saccharomyces cerevisiae (strain ATCC 204508 / S288c) GN=GSP	2	9	9	9	40.2	40.2	40.2	24.81	219	219;220	0	80.244	0.35329	0.84243	15.058	13	7	Leave out requantified	3050000000	2210000000	845000000				221	638;933;934;1638;1804;1889;2099;2266;2589	True;True;True;True;True;True;True;True;True	677;986;987;1736;1934;2025;2250;2432;2779	942;1358;1359;1360;2359;2626;2627;2628;2751;3051;3052;3317;3789	1406;1407;2053;2054;2055;2056;3514;3898;3899;3900;4100;4524;4525;4932;4933;5668;5669	1407;2054;2056;3514;3900;4100;4525;4932;5668
sp|P32905|RSSA1_YEAST	sp|P32905|RSSA1_YEAST	11	1	1	sp|P32905|RSSA1_YEAST 40S ribosomal protein S0-A OS=Saccharomyces cerevisiae (strain ATCC 204508 / S288c) GN=RPS0A PE=1 SV=3	1	11	1	1	60.7	2.8	2.8	28.024	252	252	0.007732	6.0818	0.32792	0.60534	NaN	1	0	Median	11397000	8811700	2585600				222	402;615;707;1038;1632;1892;1893;1908;2116;2234;2506	False;False;False;False;False;False;False;False;True;False;False	429;653;749;1096;1730;2028;2029;2044;2268;2393;2394;2689;2690	603;907;908;1036;1511;1512;2352;2353;2755;2756;2757;2758;2759;2778;3076;3260;3261;3262;3674;3675	899;1354;1355;1356;1357;1555;1556;2264;2265;2266;2267;3506;3507;3508;4105;4106;4107;4108;4109;4110;4111;4112;4138;4562;4563;4834;4835;4836;4837;4838;5477;5478;5479;5480	899;1356;1555;2264;3508;4106;4107;4138;4563;4836;5477		217	4		198	2
sp|P33297|PRS6A_YEAST	sp|P33297|PRS6A_YEAST	4	4	4	sp|P33297|PRS6A_YEAST 26S protease regulatory subunit 6A OS=Saccharomyces cerevisiae (strain ATCC 204508 / S288c) GN=RPT5 PE=1 SV=3	1	4	4	4	15	15	15	48.255	434	434	0	27.245	0.64669	1.1869	9.939	4	0	Leave out requantified	212000000	122000000	89562000				223	484;2040;2312;2605	True;True;True;True	515;2188;2481;2796	714;2968;3385;3815	1091;1092;4406;5031;5707;5708	1091;4406;5031;5708
sp|P33298|PRS6B_YEAST	sp|P33298|PRS6B_YEAST	3	3	3	sp|P33298|PRS6B_YEAST 26S protease regulatory subunit 6B homolog OS=Saccharomyces cerevisiae (strain ATCC 204508 / S288c) GN=RPT3 PE=1 SV=2	1	3	3	3	9.3	9.3	9.3	47.893	428	428	0	27.94	0.53359	1.0212	22.918	3	0	Leave out requantified	118000000	75516000	42894000				224	159;530;1699	True;True;True	174;565;1815	251;787;2463	379;1186;1187;3654	379;1187;3654		218			360
sp|P33299|PRS7_YEAST	sp|P33299|PRS7_YEAST	6	6	6	sp|P33299|PRS7_YEAST 26S protease regulatory subunit 7 homolog OS=Saccharomyces cerevisiae (strain ATCC 204508 / S288c) GN=RPT1 PE=1 SV=1	1	6	6	6	13.1	13.1	13.1	51.982	467	467	0	43.402	0.60332	1.1056	7.7759	6	1	Leave out requantified	360000000	216000000	144000000				225	606;624;628;2350;2382;2669	True;True;True;True;True;True	644;662;666;2521;2553;2865	894;920;926;3442;3485;3906	1338;1373;1382;1383;5113;5168;5843	1338;1373;1382;5113;5168;5843
sp|P33322|CBF5_YEAST	sp|P33322|CBF5_YEAST	3	3	3	sp|P33322|CBF5_YEAST H/ACA ribonucleoprotein complex subunit 4 OS=Saccharomyces cerevisiae (strain ATCC 204508 / S288c) GN=CBF5 PE=1 SV=1	1	3	3	3	9.5	9.5	9.5	54.704	483	483	0	24.354	0.41206	0.7617	155.2	4	0	Leave out requantified	219000000	93302000	125000000				226	334;2187;2222	True;True;True	357;2344;2381	502;3189;3190;3246	753;4736;4737;4817	753;4736;4817
sp|P33333|PLSC_YEAST	sp|P33333|PLSC_YEAST	2	2	2	sp|P33333|PLSC_YEAST Probable 1-acyl-sn-glycerol-3-phosphate acyltransferase OS=Saccharomyces cerevisiae (strain ATCC 204508 / S288c) GN=SLC1 PE=1 SV=1	1	2	2	2	8.9	8.9	8.9	33.887	303	303	0	12.22	0.33069	0.60146	30.104	2	1	Median	84031000	61870000	22162000				227	1121;2808	True;True	1186;3016	1642;4111	2459;6132	2459;6132
sp|P33401|PGM1_YEAST;sp|P37012|PGM2_YEAST	sp|P33401|PGM1_YEAST	5;1	5;1	5;1	sp|P33401|PGM1_YEAST Phosphoglucomutase 1 OS=Saccharomyces cerevisiae (strain ATCC 204508 / S288c) GN=PGM1 PE=1 SV=1	2	5	5	5	12.3	12.3	12.3	63.111	570	570;569	0	39.245	0.48781	0.87556	10.202	5	1	Leave out requantified	257000000	171000000	86164000				228	959;1481;1582;1629;2888	True;True;True;True;True	1013;1569;1676;1726;3102	1395;2149;2283;2348;4243	2098;3211;3402;3501;6327	2098;3211;3402;3501;6327
sp|P33442|RS3A1_YEAST	sp|P33442|RS3A1_YEAST	21	5	5	sp|P33442|RS3A1_YEAST 40S ribosomal protein S1-A OS=Saccharomyces cerevisiae (strain ATCC 204508 / S288c) GN=RPS1A PE=1 SV=2	1	21	5	5	74.5	16.1	16.1	28.743	255	255	0	36.277	0.32071	0.60507	23.522	5	0	Leave out requantified	1410000000	1050000000	366000000				229	156;289;466;603;637;948;1009;1230;1302;1459;1571;1799;1800;2102;2512;2680;2776;2800;2802;2803;2841	False;False;False;True;False;False;False;False;True;False;False;False;False;True;False;True;True;False;False;False;False	171;307;496;641;675;676;1002;1066;1303;1379;1545;1665;1927;1928;1929;1930;2253;2696;2879;2981;3008;3010;3011;3053	247;248;436;437;691;692;889;938;939;940;941;1381;1382;1466;1467;1801;1901;2117;2118;2269;2618;2619;2620;2621;2622;3056;3682;3683;3923;4066;4100;4102;4103;4104;4105;4168	373;374;375;662;663;664;1043;1044;1045;1046;1047;1328;1329;1330;1399;1400;1401;1402;1403;1404;1405;2080;2081;2082;2194;2195;2196;2704;2841;2842;3161;3162;3163;3164;3384;3385;3888;3889;3890;3891;3892;3893;3894;4531;5493;5494;5495;5866;6070;6115;6116;6118;6119;6120;6121;6122;6123;6215	373;662;1046;1330;1401;2080;2194;2704;2841;3162;3384;3888;3893;4531;5494;5866;6070;6115;6120;6122;6215		177;178			103;229
sp|P33892|GCN1_YEAST	sp|P33892|GCN1_YEAST	6	6	6	sp|P33892|GCN1_YEAST eIF-2-alpha kinase activator GCN1 OS=Saccharomyces cerevisiae (strain ATCC 204508 / S288c) GN=GCN1 PE=1 SV=1	1	6	6	6	3	3	3	296.69	2672	2672	0	35.249	0.36935	0.68564	8.2778	6	2	Leave out requantified	111000000	81024000	30166000				230	118;200;930;1288;1425;2602	True;True;True;True;True;True	128;215;983;1364;1506;2792	177;307;1355;1880;2069;3809	271;272;467;2049;2817;3098;3099;5699	272;467;2049;2817;3098;5699
sp|P34216|EDE1_YEAST	sp|P34216|EDE1_YEAST	11	11	11	sp|P34216|EDE1_YEAST EH domain-containing and endocytosis protein 1 OS=Saccharomyces cerevisiae (strain ATCC 204508 / S288c) GN=EDE1 PE=1 SV=2	1	11	11	11	11.8	11.8	11.8	150.78	1381	1381	0	88.874	0.72353	1.3718	12.054	12	2	Leave out requantified	1180000000	668000000	512000000				231	533;703;830;1382;1530;1773;1977;1981;2543;2581;2685	True;True;True;True;True;True;True;True;True;True;True	569;745;876;1461;1621;1899;2121;2125;2730;2771;2885	793;1031;1198;2011;2213;2580;2581;2874;2879;3731;3732;3781;3929	1195;1548;1792;1793;3005;3305;3846;3847;4278;4284;5577;5578;5579;5655;5873	1195;1548;1793;3005;3305;3846;4278;4284;5578;5655;5873
sp|P34233|ASH1_YEAST	sp|P34233|ASH1_YEAST	1	1	1	sp|P34233|ASH1_YEAST Transcriptional regulatory protein ASH1 OS=Saccharomyces cerevisiae (strain ATCC 204508 / S288c) GN=ASH1 PE=1 SV=1	1	1	1	1	1.5	1.5	1.5	65.684	588	588	1	-2	NaN	NaN	NaN	0	0	Median	0	0	0	#ERROR!			232	1276	TRUE	1352	1866	2800	2800			5			388
sp|P34241|URB1_YEAST	sp|P34241|URB1_YEAST	2	2	2	sp|P34241|URB1_YEAST Nucleolar pre-ribosomal-associated protein 1 OS=Saccharomyces cerevisiae (strain ATCC 204508 / S288c) GN=URB1 PE=1 SV=2	1	2	2	2	1.8	1.8	1.8	203.28	1764	1764	0	11.854	0.73585	1.3568	17.133	2	0	Median	12590000	8000400	4589300				233	1064;1760	True;True	1123;1885	1550;2560	2316;3809	2316;3809
sp|P34760|TSA1_YEAST;sp|Q04120|TSA2_YEAST	sp|P34760|TSA1_YEAST	8;1	8;1	8;1	sp|P34760|TSA1_YEAST Peroxiredoxin TSA1 OS=Saccharomyces cerevisiae (strain ATCC 204508 / S288c) GN=TSA1 PE=1 SV=3	2	8	8	8	49	49	49	21.589	196	196;196	0	57.637	0.53308	0.99862	11.172	8	1	Leave out requantified	1170000000	753000000	417000000				234	368;441;801;922;1224;1621;1763;1879	True;True;True;True;True;True;True;True	392;471;846;974;1296;1718;1888;2015	549;659;1163;1339;1792;2339;2563;2735	821;993;994;1736;1737;2029;2693;3489;3816;4079	821;994;1736;2029;2693;3489;3816;4079
sp|P35191|MDJ1_YEAST	sp|P35191|MDJ1_YEAST	3	3	3	sp|P35191|MDJ1_YEAST DnaJ homolog 1, mitochondrial OS=Saccharomyces cerevisiae (strain ATCC 204508 / S288c) GN=MDJ1 PE=1 SV=1	1	3	3	3	9.2	9.2	9.2	55.56	511	511	0	22.455	0.17985	0.34033	119.26	2	1	Median	222000000	189000000	32585000				235	1381;2445;2575	True;True;True	1460;2623;2765	2010;3577;3773	3004;5329;5643	3004;5329;5643		219			409
sp|P35194|UTP20_YEAST	sp|P35194|UTP20_YEAST	3	3	3	sp|P35194|UTP20_YEAST U3 small nucleolar RNA-associated protein 20 OS=Saccharomyces cerevisiae (strain ATCC 204508 / S288c) GN=UTP20 PE=1 SV=3	1	3	3	3	1.2	1.2	1.2	287.56	2493	2493	0	16.336	0.4999	0.9205	31.112	3	1	Plateau	14435000	9433900	5000600				236	1465;1553;2031	True;True;True	1552;1647;2178	2128;2248;2957	3180;3360;4393	3180;3360;4393
sp|P38711|RS27B_YEAST;sp|P35997|RS27_YEAST	sp|P38711|RS27B_YEAST;sp|P35997|RS27_YEAST	3;3	3;3	3;3	sp|P38711|RS27B_YEAST 40S ribosomal protein S27-B OS=Saccharomyces cerevisiae (strain ATCC 204508 / S288c) GN=RPS27B PE=1 SV=1;sp|P35997|RS27_YEAST 40S ribosomal protein S27-A OS=Saccharomyces cerevisiae (strain ATCC 204508 / S288c) GN=RPS27A PE=1 SV=1	2	3	3	3	37.8	37.8	37.8	8.8653	82	82;82	0	29.799	0.29703	0.6462	11.149	5	0	Leave out requantified	3760000000	2840000000	918000000				237	1576;2481;2715	True;True;True	1670;2660;2916	2275;3630;3631;3973;3974	3391;3392;5413;5414;5415;5937;5938;5939	3391;5413;5939
sp|P36008|EF1G2_YEAST	sp|P36008|EF1G2_YEAST	4	4	4	sp|P36008|EF1G2_YEAST Elongation factor 1-gamma 2 OS=Saccharomyces cerevisiae (strain ATCC 204508 / S288c) GN=TEF4 PE=1 SV=1	1	4	4	4	10.9	10.9	10.9	46.52	412	412	0	31.603	0.50537	0.94933	8.9841	2	0	Median	164000000	109000000	54594000				238	1160;1485;2494;2834	True;True;True;True	1231;1573;2676;3046	1704;2153;3656;4156	2556;3217;5448;6200	2556;3217;5448;6200
sp|P36013|MAOM_YEAST	sp|P36013|MAOM_YEAST	2	2	2	sp|P36013|MAOM_YEAST NAD-dependent malic enzyme, mitochondrial OS=Saccharomyces cerevisiae (strain ATCC 204508 / S288c) GN=MAE1 PE=1 SV=1	1	2	2	2	4	4	4	74.375	669	669	0	18.586	0.39275	0.72759	14.275	3	1	Median	103000000	73427000	29918000				239	1350;1914	True;True	1428;2051	1965;1966;2786	2935;2936;4151	2935;4151
sp|P36017|VPS21_YEAST	sp|P36017|VPS21_YEAST	1	1	1	sp|P36017|VPS21_YEAST Vacuolar protein sorting-associated protein 21 OS=Saccharomyces cerevisiae (strain ATCC 204508 / S288c) GN=VPS21 PE=1 SV=1	1	1	1	1	5.7	5.7	5.7	23.081	210	210	0.002959	8.2625	0.40544	0.72215	NaN	1	0	Median	2575700	1874200	701440				240	2358	TRUE	2529	3451	5125	5125
sp|P36046|MIA40_YEAST	sp|P36046|MIA40_YEAST	1	1	1	sp|P36046|MIA40_YEAST Mitochondrial intermembrane space import and assembly protein 40 OS=Saccharomyces cerevisiae (strain ATCC 204508 / S288c) GN=MIA40 PE=1 SV=2	1	1	1	1	2.5	2.5	2.5	44.536	403	403	1	-2	NaN	NaN	NaN	0	0	Median	0	0	0	#ERROR!			241	2554	TRUE	2743	3747	5605	5605			6;7;30			243;245;247
sp|P36072|YKL8_YEAST	sp|P36072|YKL8_YEAST	1	1	1	sp|P36072|YKL8_YEAST Putative uncharacterized protein YKL118W OS=Saccharomyces cerevisiae (strain ATCC 204508 / S288c) GN=YKL118W PE=5 SV=1	1	1	1	1	13.6	13.6	13.6	11.761	103	103	1	-2	NaN	NaN	NaN	0	0	Median	0	0	0	#ERROR!			242	1859	TRUE	1995	2709	4044	4044			8;9;10			24;26;29
sp|P36105|RL14A_YEAST;sp|P38754|RL14B_YEAST	sp|P36105|RL14A_YEAST;sp|P38754|RL14B_YEAST	11;10	11;10	11;10	sp|P36105|RL14A_YEAST 60S ribosomal protein L14-A OS=Saccharomyces cerevisiae (strain ATCC 204508 / S288c) GN=RPL14A PE=1 SV=1;sp|P38754|RL14B_YEAST 60S ribosomal protein L14-B OS=Saccharomyces cerevisiae (strain ATCC 204508 / S288c) GN=RPL14B PE=1 SV=1	2	11	11	11	57.2	57.2	57.2	15.167	138	138;138	0	94.65	0.40461	0.89404	14.177	16	4	Leave out requantified	6740000000	4110000000	2630000000				243	14;699;1306;1315;1323;1324;1943;2050;2313;2701;2828	True;True;True;True;True;True;True;True;True;True;True	14;740;741;1383;1392;1400;1401;2083;2199;2482;2902;3039	19;20;1024;1025;1026;1906;1917;1926;1927;1928;2824;2825;2984;3386;3954;4146;4147	33;34;1537;1538;1539;1540;1541;2849;2850;2862;2872;2873;2874;2875;2876;4203;4204;4205;4206;4207;4208;4209;4210;4428;5032;5033;5909;6185;6186;6187	34;1539;2850;2862;2873;2875;4210;4428;5033;5909;6187		220			121
sp|P36156|GTO2_YEAST	sp|P36156|GTO2_YEAST	19	19	19	sp|P36156|GTO2_YEAST Glutathione S-transferase omega-like 2 OS=Saccharomyces cerevisiae (strain ATCC 204508 / S288c) GN=ECM4 PE=1 SV=1	1	19	19	19	61.4	61.4	61.4	43.273	370	370	0	196.55	0.677	1.3434	15.195	30	5	Leave out requantified	6900000000	4090000000	2810000000				244	45;46;77;246;636;679;816;1080;1087;1112;1113;1136;1808;1990;2044;2133;2387;2504;2956	True;True;True;True;True;True;True;True;True;True;True;True;True;True;True;True;True;True;True	47;48;83;263;674;719;720;862;1140;1148;1177;1178;1204;1938;2136;2193;2286;2558;2687;3175	63;64;65;116;375;936;937;996;997;998;1182;1572;1573;1574;1583;1584;1628;1629;1630;1663;2633;2894;2895;2976;3103;3492;3493;3669;3670;4341	97;98;99;100;101;178;569;570;1396;1397;1398;1488;1489;1490;1491;1492;1764;2347;2348;2349;2350;2363;2364;2365;2366;2431;2432;2433;2434;2491;2492;3907;3908;4307;4308;4309;4415;4416;4605;5179;5180;5181;5468;5469;5470;5471;6460;6461	98;99;178;569;1397;1490;1764;2349;2365;2431;2434;2491;3908;4307;4415;4605;5181;5468;6461		221			127
sp|P38011|GBLP_YEAST	sp|P38011|GBLP_YEAST	1	1	1	sp|P38011|GBLP_YEAST Guanine nucleotide-binding protein subunit beta-like protein OS=Saccharomyces cerevisiae (strain ATCC 204508 / S288c) GN=ASC1 PE=1 SV=4	1	1	1	1	3.4	3.4	3.4	34.805	319	319	1	-2	0.5861	1.0678	NaN	1	1	Median	18547000	11373000	7174300	#ERROR!			245	2136	TRUE	2289	3107	4610	4610		222			111
sp|P38013|AHP1_YEAST	sp|P38013|AHP1_YEAST	3	3	3	sp|P38013|AHP1_YEAST Peroxiredoxin type-2 OS=Saccharomyces cerevisiae (strain ATCC 204508 / S288c) GN=AHP1 PE=1 SV=4	1	3	3	3	35.2	35.2	35.2	19.114	176	176	0	35.324	0.4381	0.80694	16.935	2	0	Median	317000000	209000000	108000000				246	580;623;2672	True;True;True	617;661;2869	857;919;3910	1285;1372;5849	1285;1372;5849
sp|P38061|RL32_YEAST	sp|P38061|RL32_YEAST	8	8	8	sp|P38061|RL32_YEAST 60S ribosomal protein L32 OS=Saccharomyces cerevisiae (strain ATCC 204508 / S288c) GN=RPL32 PE=1 SV=1	1	8	8	8	51.5	51.5	51.5	14.771	130	130	0	55.659	0.4372	0.90973	19.698	10	1	Leave out requantified	3150000000	2130000000	1020000000				247	183;307;675;787;823;1031;2406;2559	True;True;True;True;True;True;True;True	198;325;326;714;832;869;1088;2577;2748	286;459;460;461;462;990;1144;1191;1500;3517;3518;3752	428;693;694;695;696;697;1479;1707;1780;1781;2247;5217;5218;5614;5615	428;695;1479;1707;1781;2247;5217;5614		223			87
sp|P38065|AP2A_YEAST	sp|P38065|AP2A_YEAST	2	2	2	sp|P38065|AP2A_YEAST AP-2 complex subunit alpha OS=Saccharomyces cerevisiae (strain ATCC 204508 / S288c) GN=APL3 PE=1 SV=1	1	2	2	2	2.3	2.3	2.3	115.01	1025	1025	0	11.077	0.26397	0.45436	12.724	2	0	Median	4441500	3261200	1180300				248	1609;2097	True;True	1704;2247	2319;3047	3459;4520	3459;4520
sp|P38077|ATPG_YEAST	sp|P38077|ATPG_YEAST	3	3	3	sp|P38077|ATPG_YEAST ATP synthase subunit gamma, mitochondrial OS=Saccharomyces cerevisiae (strain ATCC 204508 / S288c) GN=ATP3 PE=1 SV=1	1	3	3	3	13.2	13.2	13.2	34.35	311	311	0	19.557	0.51647	0.93368	21.19	2	0	Median	66956000	43235000	23720000				249	512;798;1948	True;True;True	543;843;2088	753;1157;2832	1144;1725;4222	1144;1725;4222
sp|P38111|ATR_YEAST	sp|P38111|ATR_YEAST	6	6	6	sp|P38111|ATR_YEAST Serine/threonine-protein kinase MEC1 OS=Saccharomyces cerevisiae (strain ATCC 204508 / S288c) GN=MEC1 PE=1 SV=1	1	6	6	6	3.8	3.8	3.8	273.34	2368	2368	0	45.732	0.91651	1.6684	9.235	7	1	Leave out requantified	384000000	360000000	23653000				250	786;1613;1614;1783;2238;2651	True;True;True;True;True;True	831;1710;1711;1910;2400;2846	1143;2328;2329;2330;2594;3270;3271;3882	1705;1706;3473;3474;3475;3476;3477;3478;3862;4849;4850;5804	1706;3476;3478;3862;4849;5804
sp|P38175|RT21_YEAST	sp|P38175|RT21_YEAST	2	2	2	sp|P38175|RT21_YEAST 37S ribosomal protein MRP21, mitochondrial OS=Saccharomyces cerevisiae (strain ATCC 204508 / S288c) GN=MRP21 PE=1 SV=1	1	2	2	2	10.7	10.7	10.7	20.394	177	177	0	12.424	0.3274	0.60834	84.219	2	2	Median	145000000	88197000	56814000				251	514;1343	True;True	545;1421	755;1958	1147;2923;2924	1147;2924
sp|P38221|CDS1_YEAST	sp|P38221|CDS1_YEAST	1	1	1	sp|P38221|CDS1_YEAST Phosphatidate cytidylyltransferase OS=Saccharomyces cerevisiae (strain ATCC 204508 / S288c) GN=CDS1 PE=1 SV=1	1	1	1	1	1.5	1.5	1.5	51.822	457	457	0.007481	5.912	0.38185	0.90843	NaN	1	0	Median	627000000	458000000	169000000				252	1445	TRUE	1531	2101	3139	3139
sp|P38241|SLT11_YEAST	sp|P38241|SLT11_YEAST	1	1	1	sp|P38241|SLT11_YEAST Pre-mRNA-splicing factor SLT11 OS=Saccharomyces cerevisiae (strain ATCC 204508 / S288c) GN=ECM2 PE=1 SV=1	1	1	1	1	1.9	1.9	1.9	40.924	364	364	0.007426	5.8954	0.43342	0.82011	NaN	1	0	Median	53361000	36825000	16536000				253	867	TRUE	914	1253	1883;1884	1883
sp|P38249|EIF3A_YEAST	sp|P38249|EIF3A_YEAST	3	3	3	sp|P38249|EIF3A_YEAST Eukaryotic translation initiation factor 3 subunit A OS=Saccharomyces cerevisiae (strain ATCC 204508 / S288c) GN=RPG1 PE=1 SV=1	1	3	3	3	4.1	4.1	4.1	110.34	964	964	0	18.801	0.30709	0.55694	11.851	3	1	Plateau	65215000	47485000	17730000				254	975;1352;2628	True;True;True	1031;1430;2823	1420;1968;3853	2129;2938;5764	2129;2938;5764
sp|P38264|PHO88_YEAST	sp|P38264|PHO88_YEAST	6	6	6	sp|P38264|PHO88_YEAST Inorganic phosphate transport protein PHO88 OS=Saccharomyces cerevisiae (strain ATCC 204508 / S288c) GN=PHO88 PE=1 SV=1	1	6	6	6	34	34	34	21.137	188	188	0	38.298	0.35598	0.65257	68.32	6	4	Median	326000000	212000000	114000000				255	155;1036;1560;2094;2183;2961	True;True;True;True;True;True	170;1094;1654;2243;2340;3180	246;1508;2256;3042;3184;4349	372;2260;3369;4515;4725;6475	372;2260;3369;4515;4725;6475		224;225			72;162
sp|P38286|MKAR_YEAST	sp|P38286|MKAR_YEAST	8	8	8	sp|P38286|MKAR_YEAST Very-long-chain 3-oxoacyl-CoA reductase OS=Saccharomyces cerevisiae (strain ATCC 204508 / S288c) GN=IFA38 PE=1 SV=1	1	8	8	8	31.1	31.1	31.1	38.708	347	347	0	59.146	0.069179	0.13239	145.69	7	7	Median	815000000	677000000	139000000				256	504;770;806;1068;1069;1774;2407;2859	True;True;True;True;True;True;True;True	535;815;851;1127;1128;1900;2578;2579;3072	743;1124;1169;1555;1556;2582;3519;3520;4200	1131;1132;1675;1745;2321;2322;3848;5219;5220;6265	1132;1675;1745;2321;2322;3848;5220;6265		226;227			4;208
sp|P38325|OM14_YEAST	sp|P38325|OM14_YEAST	1	1	1	sp|P38325|OM14_YEAST Mitochondrial outer membrane protein OM14 OS=Saccharomyces cerevisiae (strain ATCC 204508 / S288c) GN=OM14 PE=1 SV=1	1	1	1	1	19.4	19.4	19.4	14.609	134	134	0.00289	7.3674	0.28219	0.52264	NaN	1	0	Median	9520600	7600600	1920000				257	797	TRUE	842	1156	1724	1724
sp|P38333|ENP1_YEAST	sp|P38333|ENP1_YEAST	17	17	17	sp|P38333|ENP1_YEAST Essential nuclear protein 1 OS=Saccharomyces cerevisiae (strain ATCC 204508 / S288c) GN=ENP1 PE=1 SV=1	1	17	17	17	47.6	47.6	47.6	55.136	483	483	0	161.95	0.72356	1.3681	14.127	19	2	Leave out requantified	2730000000	1570000000	1160000000				258	49;274;403;487;548;658;767;824;1070;1344;1407;1539;1899;2120;2248;2766;2899	True;True;True;True;True;True;True;True;True;True;True;True;True;True;True;True;True	51;292;430;518;585;697;812;870;1129;1422;1487;1632;2035;2272;2411;2971;3114	70;419;604;719;812;968;1121;1192;1557;1959;2048;2227;2767;3081;3287;3288;4054;4262;4263	108;109;638;900;901;1099;1100;1220;1221;1446;1447;1672;1782;2323;2324;2925;2926;3071;3072;3325;3326;4124;4570;4882;4883;6055;6350;6351;6352	108;638;901;1100;1221;1447;1672;1782;2323;2925;3071;3325;4124;4570;4882;6055;6350		228			177
sp|P38351|PAF1_YEAST	sp|P38351|PAF1_YEAST	21	21	21	sp|P38351|PAF1_YEAST RNA polymerase II-associated protein 1 OS=Saccharomyces cerevisiae (strain ATCC 204508 / S288c) GN=PAF1 PE=1 SV=1	1	21	21	21	62.5	62.5	62.5	51.8	445	445	0	227.23	0.73249	1.4	13.899	26	4	Leave out requantified	5410000000	3080000000	2330000000				259	6;454;635;678;691;818;1284;1361;1509;1511;1514;2041;2064;2083;2232;2392;2398;2399;2614;2722;2936	True;True;True;True;True;True;True;True;True;True;True;True;True;True;True;True;True;True;True;True;True	6;484;673;718;732;864;1360;1439;1598;1600;1603;2189;2190;2213;2232;2391;2563;2569;2570;2805;2926;3155	8;9;675;935;995;1013;1185;1186;1875;1981;2183;2185;2188;2969;2970;2971;2972;3002;3025;3258;3500;3506;3507;3826;3827;3989;3990;4312	18;19;20;21;1018;1019;1395;1486;1487;1512;1513;1768;1769;1770;1771;1772;1773;1774;2812;2960;3262;3263;3265;3268;4407;4408;4409;4410;4456;4494;4832;5189;5198;5199;5200;5726;5727;5728;5729;5960;5961;5962;5963;6420	20;1018;1395;1487;1512;1774;2812;2960;3263;3265;3268;4410;4456;4494;4832;5189;5198;5200;5728;5960;6420		229;230;231;232;233	11		204;235;254;257;285	147
sp|P38353|SSH1_YEAST	sp|P38353|SSH1_YEAST	2	2	2	sp|P38353|SSH1_YEAST Sec sixty-one protein homolog OS=Saccharomyces cerevisiae (strain ATCC 204508 / S288c) GN=SSH1 PE=1 SV=1	1	2	2	2	8.6	8.6	8.6	53.311	490	490	0	13.494	0.65078	1.1993	16.556	2	1	Median	24287000	13639000	10648000				260	1441;2641	True;True	1525;2836	2093;3871	3128;3129;5790	3129;5790
sp|P38431|IF5_YEAST	sp|P38431|IF5_YEAST	7	7	7	sp|P38431|IF5_YEAST Eukaryotic translation initiation factor 5 OS=Saccharomyces cerevisiae (strain ATCC 204508 / S288c) GN=TIF5 PE=1 SV=1	1	7	7	7	21	21	21	45.261	405	405	0	43.318	0.26386	0.51506	101.3	7	2	Leave out requantified	706000000	479000000	228000000				261	7;309;774;1098;1548;2377;2919	True;True;True;True;True;True;True	7;328;819;1159;1642;2548;3135	10;464;1129;1600;2240;3476;4288	22;699;1682;2390;3349;5157;6384	22;699;1682;2390;3349;5157;6384
sp|P38439|LEO1_YEAST	sp|P38439|LEO1_YEAST	19	19	19	sp|P38439|LEO1_YEAST RNA polymerase-associated protein LEO1 OS=Saccharomyces cerevisiae (strain ATCC 204508 / S288c) GN=LEO1 PE=1 SV=1	1	19	19	19	50	50	50	53.919	464	464	0	263.39	0.79329	1.5206	18.287	22	2	Leave out requantified	4140000000	2660000000	1480000000				262	146;300;415;419;420;425;439;490;546;564;729;1123;1286;1440;1959;2008;2293;2586;2642	True;True;True;True;True;True;True;True;True;True;True;True;True;True;True;True;True;True;True	160;318;443;447;448;453;469;521;583;601;772;1189;1362;1524;2100;2155;2461;2776;2837	233;234;450;619;620;626;627;628;629;635;656;722;810;836;1061;1645;1646;1878;2092;2848;2924;3355;3356;3786;3872	354;355;356;357;683;924;925;926;927;934;935;936;937;938;939;940;941;942;943;944;945;954;989;1103;1218;1256;1593;2463;2464;2465;2466;2467;2468;2815;3127;4243;4349;4989;4990;4991;5665;5791;5792	357;683;926;936;945;954;989;1103;1218;1256;1593;2468;2815;3127;4243;4349;4989;5665;5792		234	12;13		435	132;372
sp|P38631|FKS1_YEAST	sp|P38631|FKS1_YEAST	3	3	3	sp|P38631|FKS1_YEAST 1,3-beta-glucan synthase component FKS1 OS=Saccharomyces cerevisiae (strain ATCC 204508 / S288c) GN=FKS1 PE=1 SV=2	1	3	3	3	1.7	1.7	1.7	214.85	1876	1876	0	17.315	0.55855	0.99827	29.587	3	0	Leave out requantified	97682000	55109000	42574000				263	1410;1446;2683	True;True;True	1490;1532;2882	2051;2102;3926	3075;3140;5870	3075;3140;5870
sp|P38682|GLO3_YEAST	sp|P38682|GLO3_YEAST	21	21	21	sp|P38682|GLO3_YEAST ADP-ribosylation factor GTPase-activating protein GLO3 OS=Saccharomyces cerevisiae (strain ATCC 204508 / S288c) GN=GLO3 PE=1 SV=1	1	21	21	21	57	57	57	55.093	493	493	0	260.19	0.13734	0.27112	188.35	18	16	Median	4130000000	3310000000	815000000				264	320;363;399;538;549;825;839;1227;1257;1415;1426;1533;1810;1822;1831;2003;2255;2272;2298;2590;2955	True;True;True;True;True;True;True;True;True;True;True;True;True;True;True;True;True;True;True;True;True	341;387;425;575;586;871;885;1299;1332;1495;1496;1507;1508;1624;1940;1941;1957;1966;2149;2150;2419;2439;2466;2780;3174	478;543;596;597;802;813;1193;1209;1796;1797;1837;2057;2058;2070;2071;2072;2216;2635;2636;2662;2674;2915;2916;3297;3324;3364;3365;3790;3791;4339;4340	717;813;889;890;1207;1222;1783;1808;2697;2698;2759;3082;3083;3100;3101;3102;3103;3104;3308;3911;3912;3976;3977;3978;3992;4338;4339;4896;4942;5002;5003;5670;5671;6458;6459	717;813;889;1207;1222;1783;1808;2697;2759;3082;3101;3308;3912;3977;3992;4338;4896;4942;5003;5671;6458		235;236;237;238;239;240			26;61;136;296;350;352
sp|P38689|KPR3_YEAST	sp|P38689|KPR3_YEAST	1	1	1	sp|P38689|KPR3_YEAST Ribose-phosphate pyrophosphokinase 3 OS=Saccharomyces cerevisiae (strain ATCC 204508 / S288c) GN=PRS3 PE=1 SV=1	1	1	1	1	4.7	4.7	4.7	35.123	320	320	0.002916	7.6539	0.27772	0.51442	0.79952	2	1	Median	15213000	11842000	3370700				265	1356	TRUE	1434	1972;1973	2943;2944	2944
sp|P38691|KSP1_YEAST	sp|P38691|KSP1_YEAST	17	17	17	sp|P38691|KSP1_YEAST Serine/threonine-protein kinase KSP1 OS=Saccharomyces cerevisiae (strain ATCC 204508 / S288c) GN=KSP1 PE=1 SV=1	1	17	17	17	23.9	23.9	23.9	117.08	1029	1029	0	151.16	0.79733	1.5049	22.387	19	5	Leave out requantified	2160000000	1160000000	1000000000				266	277;291;850;1605;1765;1823;1906;2048;2074;2153;2268;2296;2388;2458;2920;2921;2948	True;True;True;True;True;True;True;True;True;True;True;True;True;True;True;True;True	295;309;896;1699;1891;1958;2042;2197;2223;2307;2434;2464;2559;2637;3136;3137;3138;3167	422;439;1224;2314;2566;2663;2776;2982;3013;3014;3129;3319;3361;3494;3495;3597;4289;4290;4291;4332	641;666;1828;1829;3453;3820;3821;3979;4136;4425;4469;4470;4637;4638;4935;4998;5182;5183;5358;6385;6386;6387;6388;6448;6449	641;666;1829;3453;3820;3979;4136;4425;4470;4638;4935;4998;5183;5358;6385;6387;6449		241;242			247;535
sp|P38697|IMDH2_YEAST;sp|P50095|IMDH3_YEAST;sp|P39567|IMDH1_YEAST	sp|P38697|IMDH2_YEAST;sp|P50095|IMDH3_YEAST;sp|P39567|IMDH1_YEAST	3;3;2	3;3;2	1;1;1	sp|P38697|IMDH2_YEAST Inosine-5-monophosphate dehydrogenase 2 OS=Saccharomyces cerevisiae (strain ATCC 204508 / S288c) GN=IMD2 PE=1 SV=1;sp|P50095|IMDH3_YEAST Inosine-5-monophosphate dehydrogenase 3 OS=Saccharomyces cerevisiae (strain ATCC 204508 / S288c	3	3	3	1	10.1	10.1	3.8	56.529	523	523;523;403	0	30.856	0.38982	0.73679	21.831	3	2	Median	282000000	196000000	86087000				267	542;1833;2373	True;True;True	579;1968;2544	806;2676;3472	1213;3995;5152	1213;3995;5152
sp|P38701|RS20_YEAST	sp|P38701|RS20_YEAST	7	7	7	sp|P38701|RS20_YEAST 40S ribosomal protein S20 OS=Saccharomyces cerevisiae (strain ATCC 204508 / S288c) GN=RPS20 PE=1 SV=3	1	7	7	7	51.2	51.2	51.2	13.907	121	121	0	116.81	0.20805	0.4536	10.341	14	4	Leave out requantified	6930000000	5660000000	1270000000				268	491;1154;1715;1992;2558;2610;2893	True;True;True;True;True;True;True	522;1225;1836;2138;2747;2801;3107	723;724;1696;1697;2498;2499;2897;2898;3751;3821;3822;4249;4250;4251	1104;1105;1106;1107;2541;2542;2543;3717;3718;4312;4313;4314;4315;5613;5719;5720;5721;6335;6336;6337;6338	1107;2542;3718;4315;5613;5720;6338		243			84
sp|P38703|LAG1_YEAST	sp|P38703|LAG1_YEAST	1	1	1	sp|P38703|LAG1_YEAST Sphingosine N-acyltransferase LAG1 OS=Saccharomyces cerevisiae (strain ATCC 204508 / S288c) GN=LAG1 PE=1 SV=1	1	1	1	1	1.9	1.9	1.9	48.454	411	411	1	-2	NaN	NaN	NaN	0	0	Median	0	0	0	#ERROR!			269	1647	TRUE	1745	2370	3531	3531			31			18
sp|P38708|YHI0_YEAST	sp|P38708|YHI0_YEAST	8	8	8	sp|P38708|YHI0_YEAST Putative proline--tRNA ligase YHR020W OS=Saccharomyces cerevisiae (strain ATCC 204508 / S288c) GN=YHR020W PE=1 SV=1	1	8	8	8	15.7	15.7	15.7	77.385	688	688	0	55.918	0.41056	0.81319	22.955	9	5	Leave out requantified	409000000	290000000	118000000				270	92;1452;2107;2108;2217;2760;2795;2970	True;True;True;True;True;True;True;True	98;1538;2258;2259;2376;2965;3003;3192	136;2109;3062;3063;3064;3239;4044;4095;4372	209;3149;4540;4541;4542;4543;4544;4807;6041;6108;6508	209;3149;4540;4544;4807;6041;6108;6508		244			251
sp|P38720|6PGD1_YEAST	sp|P38720|6PGD1_YEAST	1	1	1	sp|P38720|6PGD1_YEAST 6-phosphogluconate dehydrogenase, decarboxylating 1 OS=Saccharomyces cerevisiae (strain ATCC 204508 / S288c) GN=GND1 PE=1 SV=1	1	1	1	1	3.7	3.7	3.7	53.543	489	489	0.002817	7.0453	0.56184	1.0267	6.1283	2	0	Median	7208000	4379300	2828700				271	57	TRUE	59	81;82	125;126;127	125
sp|P38742|NPR3_YEAST	sp|P38742|NPR3_YEAST	1	1	1	sp|P38742|NPR3_YEAST Nitrogen permease regulator 3 OS=Saccharomyces cerevisiae (strain ATCC 204508 / S288c) GN=NPR3 PE=1 SV=1	1	1	1	1	0.8	0.8	0.8	129.97	1146	1146	0.002667	6.5015	0.42025	0.7521	NaN	1	0	Median	38893000	26475000	12417000				272	1779	TRUE	1906	2589	3856	3856
sp|P38764|RPN1_YEAST	sp|P38764|RPN1_YEAST	7	7	7	sp|P38764|RPN1_YEAST 26S proteasome regulatory subunit RPN1 OS=Saccharomyces cerevisiae (strain ATCC 204508 / S288c) GN=RPN1 PE=1 SV=3	1	7	7	7	10.6	10.6	10.6	109.49	993	993	0	48.448	0.66295	1.3028	17.767	7	0	Leave out requantified	341000000	196000000	145000000				273	253;543;656;1150;1467;1500;2299	True;True;True;True;True;True;True	270;580;695;1219;1554;1589;2467	384;807;966;1686;2130;2173;3366	581;582;583;1214;1215;1443;2526;3182;3247;3248;5004	582;1215;1443;2526;3182;3247;5004		245			124
sp|P38820|UBA4_YEAST	sp|P38820|UBA4_YEAST	2	2	2	sp|P38820|UBA4_YEAST Adenylyltransferase and sulfurtransferase UBA4 OS=Saccharomyces cerevisiae (strain ATCC 204508 / S288c) GN=UBA4 PE=1 SV=1	1	2	2	2	4.8	4.8	4.8	49.361	440	440	0	13.785	0.82977	1.5292	44.72	2	0	Median	97128000	45138000	51990000				274	1532;1907	True;True	1623;2043	2215;2777	3307;4137	3307;4137
sp|P38861|NMD3_YEAST	sp|P38861|NMD3_YEAST	1	1	1	sp|P38861|NMD3_YEAST 60S ribosomal export protein NMD3 OS=Saccharomyces cerevisiae (strain ATCC 204508 / S288c) GN=NMD3 PE=1 SV=3	1	1	1	1	2.3	2.3	2.3	59.095	518	518	0.002762	6.8308	0.3542	0.63806	NaN	1	0	Median	35565000	27083000	8481200				275	1671	TRUE	1776	2410	3588	3588		246			210
sp|P38862|ATG7_YEAST	sp|P38862|ATG7_YEAST	1	1	1	sp|P38862|ATG7_YEAST Ubiquitin-like modifier-activating enzyme ATG7 OS=Saccharomyces cerevisiae (strain ATCC 204508 / S288c) GN=ATG7 PE=1 SV=1	1	1	1	1	2.1	2.1	2.1	71.427	630	630	1	-2	NaN	NaN	NaN	0	0	Median	0	0	0	#ERROR!			276	2292	TRUE	2460	3354	4988	4988			14			8
sp|P38875|GPI16_YEAST	sp|P38875|GPI16_YEAST	2	2	2	sp|P38875|GPI16_YEAST GPI transamidase component GPI16 OS=Saccharomyces cerevisiae (strain ATCC 204508 / S288c) GN=GPI16 PE=1 SV=2	1	2	2	2	3.8	3.8	3.8	68.771	610	610	0	11.573	NaN	NaN	NaN	0	0	Median	54305000	54305000	0				277	1162;2166	True;True	1233;2322	1706;3153	2558;4669	2558;4669
sp|P38883|RIX1_YEAST	sp|P38883|RIX1_YEAST	1	1	1	sp|P38883|RIX1_YEAST Pre-rRNA-processing protein RIX1 OS=Saccharomyces cerevisiae (strain ATCC 204508 / S288c) GN=RIX1 PE=1 SV=2	1	1	1	1	1.6	1.6	1.6	86.738	763	763	0.00271	6.6115	0.45509	0.84264	NaN	1	0	Median	6904200	5066100	1838200				278	2756	TRUE	2960	4038	6034	6034
sp|P38929|ATC2_YEAST	sp|P38929|ATC2_YEAST	35	35	35	sp|P38929|ATC2_YEAST Calcium-transporting ATPase 2 OS=Saccharomyces cerevisiae (strain ATCC 204508 / S288c) GN=PMC1 PE=1 SV=1	1	35	35	35	36.3	36.3	36.3	130.86	1173	1173	0	323.31	0.74786	1.4337	15.876	40	5	Leave out requantified	6640000000	3750000000	2900000000				279	99;234;301;401;567;573;653;685;732;805;819;961;1133;1299;1332;1362;1393;1507;1589;1710;1717;1718;1733;1805;1845;1903;2112;2239;2278;2327;2396;2425;2819;2831;2962	True;True;True;True;True;True;True;True;True;True;True;True;True;True;True;True;True;True;True;True;True;True;True;True;True;True;True;True;True;True;True;True;True;True;True	105;250;319;427;428;604;610;692;726;775;850;865;1015;1201;1376;1409;1440;1472;1596;1683;1831;1838;1839;1855;1935;1980;2039;2263;2401;2445;2496;2567;2598;2599;3030;3043;3181	143;358;451;599;600;601;602;839;847;962;1004;1065;1066;1168;1187;1397;1398;1660;1897;1941;1982;2027;2181;2291;2489;2502;2503;2525;2526;2629;2691;2773;3069;3272;3333;3405;3504;3545;3546;4130;4153;4350	223;543;544;684;892;893;894;895;896;897;898;1259;1260;1272;1435;1436;1498;1597;1598;1599;1743;1744;1775;1776;2100;2101;2486;2837;2896;2961;3028;3029;3259;3260;3415;3416;3705;3706;3721;3722;3723;3750;3751;3752;3753;3901;3902;4016;4017;4132;4133;4550;4551;4851;4963;5067;5195;5196;5256;5257;5258;5259;6160;6161;6196;6197;6476;6477	223;543;684;894;1259;1272;1436;1498;1597;1744;1775;2100;2486;2837;2896;2961;3029;3259;3415;3705;3722;3723;3753;3901;4016;4132;4551;4851;4963;5067;5196;5256;6160;6197;6477		247;248;249;250;251;252;253			292;436;455;760;832;858;875
sp|P38934|BFR1_YEAST	sp|P38934|BFR1_YEAST	2	2	2	sp|P38934|BFR1_YEAST Nuclear segregation protein BFR1 OS=Saccharomyces cerevisiae (strain ATCC 204508 / S288c) GN=BFR1 PE=1 SV=1	1	2	2	2	3.8	3.8	3.8	54.639	470	470	0.003068	10.652	0.79802	1.5151	NaN	1	0	Median	216000000	137000000	78937000				280	1225;1478	True;True	1297;1566	1793;2146	2694;3208	2694;3208
sp|P38988|GGC1_YEAST	sp|P38988|GGC1_YEAST	2	2	2	sp|P38988|GGC1_YEAST Mitochondrial GTP/GDP carrier protein 1 OS=Saccharomyces cerevisiae (strain ATCC 204508 / S288c) GN=GGC1 PE=1 SV=1	1	2	2	2	8	8	8	33.215	300	300	0	14.631	0.44487	0.81827	5.0915	2	0	Median	42685000	29277000	13407000				281	1404;1739	True;True	1484;1861	2045;2533	3068;3765	3068;3765
sp|P39009|DUN1_YEAST	sp|P39009|DUN1_YEAST	1	1	1	sp|P39009|DUN1_YEAST DNA damage response protein kinase DUN1 OS=Saccharomyces cerevisiae (strain ATCC 204508 / S288c) GN=DUN1 PE=1 SV=1	1	1	1	1	3.7	3.7	3.7	58.632	513	513	0.00304	9.6574	0.73871	1.3569	NaN	1	0	Median	21040000	12106000	8933600				282	2749	TRUE	2953	4029	6022	6022
sp|P39015|STM1_YEAST	sp|P39015|STM1_YEAST	14	14	14	sp|P39015|STM1_YEAST Suppressor protein STM1 OS=Saccharomyces cerevisiae (strain ATCC 204508 / S288c) GN=STM1 PE=1 SV=3	1	14	14	14	54.9	54.9	54.9	29.995	273	273	0	191.2	0.4693	0.8999	19.114	19	2	Leave out requantified	3070000000	2060000000	1010000000				283	362;398;407;826;1199;1245;1297;1769;2204;2205;2263;2370;2371;2732	True;True;True;True;True;True;True;True;True;True;True;True;True;True	386;424;434;872;1271;1319;1374;1895;2363;2364;2429;2541;2542;2936	542;595;608;609;1194;1756;1822;1895;2570;2571;3219;3220;3221;3222;3223;3312;3313;3468;3469;3470;4006;4007	812;887;888;906;907;908;1784;1785;2631;2632;2633;2733;2834;2835;3825;3826;4779;4780;4781;4782;4783;4784;4785;4786;4921;4922;4923;4924;4925;4926;5147;5148;5149;5986;5987;5988;5989	812;887;908;1784;2631;2733;2834;3825;4782;4784;4924;5148;5149;5986
sp|P39076|TCPB_YEAST	sp|P39076|TCPB_YEAST	4	4	4	sp|P39076|TCPB_YEAST T-complex protein 1 subunit beta OS=Saccharomyces cerevisiae (strain ATCC 204508 / S288c) GN=CCT2 PE=1 SV=1	1	4	4	4	8.7	8.7	8.7	57.203	527	527	0	30.287	0.64543	1.269	7.8516	4	1	Leave out requantified	311000000	191000000	120000000				284	743;1346;1572;2714	True;True;True;True	788;1424;1666;2915	1086;1961;2270;3972	1627;2929;3386;5936	1627;2929;3386;5936
sp|P39077|TCPG_YEAST	sp|P39077|TCPG_YEAST	7	7	7	sp|P39077|TCPG_YEAST T-complex protein 1 subunit gamma OS=Saccharomyces cerevisiae (strain ATCC 204508 / S288c) GN=CCT3 PE=1 SV=2	1	7	7	7	16.1	16.1	16.1	58.814	534	534	0	47.62	0.4929	0.93001	9.1931	7	1	Leave out requantified	627000000	410000000	218000000				285	132;885;1119;1240;1461;2364;2466	True;True;True;True;True;True;True	142;934;1184;1314;1547;2535;2645	198;1280;1640;1816;2121;3460;3608	306;307;1925;2456;2723;3170;5137;5377	306;1925;2456;2723;3170;5137;5377
sp|P39078|TCPD_YEAST	sp|P39078|TCPD_YEAST	8	8	8	sp|P39078|TCPD_YEAST T-complex protein 1 subunit delta OS=Saccharomyces cerevisiae (strain ATCC 204508 / S288c) GN=CCT4 PE=1 SV=2	1	8	8	8	21.4	21.4	21.4	57.603	528	528	0	71.05	0.48068	0.91946	7.6705	10	1	Leave out requantified	617000000	410000000	207000000				286	19;263;804;1174;1518;1880;2000;2169	True;True;True;True;True;True;True;True	19;281;849;1246;1607;2016;2146;2326	25;398;399;400;1167;1721;1722;2193;2736;2907;3158	41;606;607;608;1742;2583;2584;2585;3273;4080;4326;4682	41;607;1742;2583;3273;4080;4326;4682
sp|P39079|TCPZ_YEAST	sp|P39079|TCPZ_YEAST	5	5	5	sp|P39079|TCPZ_YEAST T-complex protein 1 subunit zeta OS=Saccharomyces cerevisiae (strain ATCC 204508 / S288c) GN=CCT6 PE=1 SV=1	1	5	5	5	14.5	14.5	14.5	59.923	546	546	0	62.555	0.58053	1.0499	9.6865	7	1	Leave out requantified	322000000	112000000	209000000				287	0;710;939;1719;2416	True;True;True;True;True	0;752;992;1840;2588	0;1039;1365;2504;2505;3532;3533	0;1;1559;2062;3724;3725;5237;5238;5239	1;1559;2062;3725;5238
sp|P39522|ILV3_YEAST	sp|P39522|ILV3_YEAST	1	1	1	sp|P39522|ILV3_YEAST Dihydroxy-acid dehydratase, mitochondrial OS=Saccharomyces cerevisiae (strain ATCC 204508 / S288c) GN=ILV3 PE=1 SV=2	1	1	1	1	5.6	5.6	5.6	62.86	585	585	0.003086	10.704	0.44828	0.82114	NaN	1	0	Median	15469000	10371000	5097900				288	384	TRUE	409	575	858	858
sp|P39676|FHP_YEAST	sp|P39676|FHP_YEAST	3	3	3	sp|P39676|FHP_YEAST Flavohemoprotein OS=Saccharomyces cerevisiae (strain ATCC 204508 / S288c) GN=YHB1 PE=1 SV=2	1	3	3	3	12.3	12.3	12.3	44.646	399	399	0	21.07	0.54416	1.026	107.72	3	1	Median	192000000	108000000	84651000				289	197;1062;2639	True;True;True	212;1121;2834	304;1548;3868	463;2314;5786	463;2314;5786
sp|P39692|MET10_YEAST	sp|P39692|MET10_YEAST	19	19	19	sp|P39692|MET10_YEAST Sulfite reductase [NADPH] flavoprotein component OS=Saccharomyces cerevisiae (strain ATCC 204508 / S288c) GN=MET10 PE=1 SV=2	1	19	19	19	24.6	24.6	24.6	114.83	1035	1035	0	144.36	0.42637	0.80262	18.46	21	4	Leave out requantified	1460000000	957000000	502000000				290	131;405;722;796;1022;1601;1750;1874;1933;2161;2182;2282;2549;2550;2551;2600;2663;2738;2889	True;True;True;True;True;True;True;True;True;True;True;True;True;True;True;True;True;True;True	141;432;765;841;1079;1695;1873;2010;2073;2317;2339;2449;2737;2738;2739;2790;2858;2942;3103	197;606;1053;1054;1155;1488;2308;2548;2729;2811;3145;3182;3183;3339;3740;3741;3742;3743;3807;3898;4015;4244	305;904;1584;1585;1723;2227;2228;3446;3787;3788;4072;4184;4657;4721;4722;4723;4724;4970;5593;5594;5595;5596;5597;5598;5599;5697;5829;5830;6002;6328	305;904;1584;1723;2227;3446;3788;4072;4184;4657;4721;4970;5593;5596;5598;5697;5830;6002;6328
sp|P39727|ERV46_YEAST	sp|P39727|ERV46_YEAST	8	8	8	sp|P39727|ERV46_YEAST ER-derived vesicles protein ERV46 OS=Saccharomyces cerevisiae (strain ATCC 204508 / S288c) GN=ERV46 PE=1 SV=2	1	8	8	8	23.4	23.4	23.4	46.235	415	415	0	74.734	0.074178	0.1401	127.26	7	6	Median	867000000	795000000	71986000				291	299;330;776;906;1104;1868;2321;2588	True;True;True;True;True;True;True;True	317;352;821;958;1169;2004;2490;2778	449;495;1131;1316;1615;2722;3398;3788	682;743;1684;1985;2415;4062;5059;5667	682;743;1684;1985;2415;4062;5059;5667		254			356
sp|P39935|IF4F1_YEAST	sp|P39935|IF4F1_YEAST	1	1	1	sp|P39935|IF4F1_YEAST Eukaryotic initiation factor 4F subunit p150 OS=Saccharomyces cerevisiae (strain ATCC 204508 / S288c) GN=TIF4631 PE=1 SV=2	1	1	1	1	1.4	1.4	1.4	107.1	952	952	0.002703	6.6115	0.65209	1.0827	NaN	1	0	Median	1429000	850680	578310				292	2032	TRUE	2179	2958	4394;4395	4395
sp|P39938|RS26A_YEAST	sp|P39938|RS26A_YEAST	4	4	1	sp|P39938|RS26A_YEAST 40S ribosomal protein S26-A OS=Saccharomyces cerevisiae (strain ATCC 204508 / S288c) GN=RPS26A PE=1 SV=1	1	4	4	1	37	37	6.7	13.505	119	119	0	32.539	0.20122	0.43317	13.822	7	3	Leave out requantified	3240000000	2670000000	573000000				293	316;1437;1782;2759	True;True;True;True	337;1521;1909;2964	473;2088;2089;2592;2593;4042;4043	709;710;3123;3124;3859;3860;3861;6038;6039;6040	710;3123;3861;6038
sp|P39976|DLD3_YEAST	sp|P39976|DLD3_YEAST	1	1	1	sp|P39976|DLD3_YEAST D-lactate dehydrogenase [cytochrome] 3 OS=Saccharomyces cerevisiae (strain ATCC 204508 / S288c) GN=DLD3 PE=1 SV=1	1	1	1	1	3.2	3.2	3.2	55.224	496	496	0.002793	6.8814	0.41458	0.76083	NaN	1	0	Median	49051000	31746000	17305000				294	1513	TRUE	1602	2187	3267	3267
sp|P40008|FMP52_YEAST	sp|P40008|FMP52_YEAST	17	17	17	sp|P40008|FMP52_YEAST Protein FMP52, mitochondrial OS=Saccharomyces cerevisiae (strain ATCC 204508 / S288c) GN=FMP52 PE=1 SV=1	1	17	17	17	81.8	81.8	81.8	25.086	231	231	0	183.85	0.37034	0.73941	12.118	25	5	Leave out requantified	9640000000	6640000000	3000000000				295	1;292;356;488;517;748;884;988;1487;1677;1691;1911;2025;2654;2747;2790;2843	True;True;True;True;True;True;True;True;True;True;True;True;True;True;True;True;True	1;310;380;519;548;793;933;1044;1575;1783;1804;1805;2048;2172;2849;2951;2997;3055;3056	1;440;533;534;720;758;759;1093;1278;1279;1436;1437;2155;2419;2450;2451;2783;2948;3886;3887;4027;4087;4171;4172;4173;4174	2;3;4;667;668;796;797;798;1101;1151;1152;1636;1922;1923;1924;2148;2149;2150;2151;3221;3222;3599;3600;3639;3640;3641;4148;4382;4383;5809;5810;5811;5812;6019;6020;6097;6219;6220;6221;6222;6223	2;668;798;1101;1152;1636;1922;2151;3221;3599;3639;4148;4383;5811;6019;6097;6221		255;256;257			1;64;128
sp|P40010|NUG1_YEAST	sp|P40010|NUG1_YEAST	3	3	3	sp|P40010|NUG1_YEAST Nuclear GTP-binding protein NUG1 OS=Saccharomyces cerevisiae (strain ATCC 204508 / S288c) GN=NUG1 PE=1 SV=1	1	3	3	3	9	9	9	57.708	520	520	0	24.049	0.37941	0.69967	8.5673	2	1	Median	28743000	20793000	7950100				296	428;777;2339	True;True;True	456;822;2510	640;1132;3423	962;963;1685;5092	962;1685;5092
sp|P40069|IMB4_YEAST	sp|P40069|IMB4_YEAST	1	1	1	sp|P40069|IMB4_YEAST Importin subunit beta-4 OS=Saccharomyces cerevisiae (strain ATCC 204508 / S288c) GN=KAP123 PE=1 SV=1	1	1	1	1	1.5	1.5	1.5	122.6	1113	1113	0.00274	6.7616	0.48534	0.8915	NaN	1	0	Median	3972800	2736000	1236700				297	616	TRUE	654	909	1358;1359	1359
sp|P40075|SCS2_YEAST	sp|P40075|SCS2_YEAST	1	1	1	sp|P40075|SCS2_YEAST Vesicle-associated membrane protein-associated protein SCS2 OS=Saccharomyces cerevisiae (strain ATCC 204508 / S288c) GN=SCS2 PE=1 SV=3	1	1	1	1	5.3	5.3	5.3	26.925	244	244	0.002825	7.0463	2.9729	5.6427	NaN	1	1	Median	177000000	32954000	144000000				298	584	TRUE	621	863	1293	1293
sp|P40078|NSA2_YEAST	sp|P40078|NSA2_YEAST	1	1	1	sp|P40078|NSA2_YEAST Ribosome biogenesis protein NSA2 OS=Saccharomyces cerevisiae (strain ATCC 204508 / S288c) GN=NSA2 PE=1 SV=1	1	1	1	1	7.7	7.7	7.7	29.722	261	261	0.002849	7.1276	0.42905	0.78212	NaN	1	0	Median	24582000	15713000	8868700				299	147	TRUE	161	235	358	358
sp|P40098|FMP10_YEAST	sp|P40098|FMP10_YEAST	1	1	1	sp|P40098|FMP10_YEAST Uncharacterized mitochondrial membrane protein FMP10 OS=Saccharomyces cerevisiae (strain ATCC 204508 / S288c) GN=FMP10 PE=1 SV=1	1	1	1	1	9	9	9	27.698	244	244	0	13.658	0.45103	0.82827	NaN	1	0	Median	14459000	9579600	4879600				300	1991	TRUE	2137	2896	4310;4311	4311
sp|P40150|HSP76_YEAST	sp|P40150|HSP76_YEAST	30	29	1	sp|P40150|HSP76_YEAST Heat shock protein SSB2 OS=Saccharomyces cerevisiae (strain ATCC 204508 / S288c) GN=SSB2 PE=1 SV=2	1	30	29	1	57.9	56.8	2.1	66.594	613	613	0	323.31	0.49442	1.0157	15.56	43	8	Leave out requantified	12200000000	8090000000	4110000000				301	4;172;209;254;540;641;995;996;1051;1386;1451;1499;1595;1674;1709;1778;1834;1876;2022;2054;2211;2275;2303;2319;2326;2411;2417;2477;2667;2785	True;True;True;True;True;True;True;True;True;True;False;True;True;True;True;True;True;True;True;True;True;True;True;True;True;True;True;True;True;True	4;187;224;271;577;680;1051;1052;1109;1465;1537;1588;1689;1780;1829;1830;1904;1905;1969;2012;2169;2203;2370;2442;2472;2488;2495;2583;2589;2656;2862;2991	6;272;320;321;322;385;804;948;949;1446;1447;1448;1529;1530;2016;2017;2108;2172;2298;2415;2416;2487;2488;2586;2587;2588;2677;2678;2731;2732;2943;2989;3231;3232;3329;3372;3395;3403;3404;3525;3534;3624;3902;3903;4080	14;15;410;487;488;489;584;585;1209;1210;1415;1416;2162;2163;2164;2165;2166;2289;2290;2291;3012;3013;3014;3015;3148;3245;3246;3428;3593;3594;3595;3701;3702;3703;3704;3852;3853;3854;3855;3996;3997;3998;3999;4074;4075;4076;4376;4377;4434;4435;4795;4796;4956;5012;5013;5055;5064;5065;5066;5227;5240;5241;5403;5404;5835;5836;5837;5838;6089	14;410;487;585;1210;1415;2164;2165;2290;3012;3148;3246;3428;3595;3701;3852;3998;4076;4376;4434;4796;4956;5012;5055;5066;5227;5241;5403;5835;6089		144;145;146;147			129;470;471;522
sp|P40212|RL13B_YEAST;sp|Q12690|RL13A_YEAST	sp|P40212|RL13B_YEAST;sp|Q12690|RL13A_YEAST	12;11	12;11	12;11	sp|P40212|RL13B_YEAST 60S ribosomal protein L13-B OS=Saccharomyces cerevisiae (strain ATCC 204508 / S288c) GN=RPL13B PE=1 SV=1;sp|Q12690|RL13A_YEAST 60S ribosomal protein L13-A OS=Saccharomyces cerevisiae (strain ATCC 204508 / S288c) GN=RPL13A PE=1 SV=1	2	12	12	12	53.8	53.8	53.8	22.525	199	199;199	0	157.65	0.43787	0.92637	15.66	19	0	Leave out requantified	10900000000	7550000000	3330000000				302	10;149;215;280;481;772;972;973;1468;1836;1920;2658	True;True;True;True;True;True;True;True;True;True;True;True	10;163;231;298;512;817;1028;1029;1555;1971;2057;2853	13;14;237;238;332;333;425;710;1126;1127;1416;1417;1418;2131;2132;2680;2793;2794;3892	25;26;27;360;361;362;363;501;502;503;504;644;1078;1079;1080;1081;1082;1083;1084;1085;1677;1678;1679;1680;2124;2125;2126;2127;3183;3184;3185;3186;3187;3188;4002;4161;4162;4163;4164;5820;5821	27;362;503;644;1085;1679;2124;2125;3187;4002;4162;5820
sp|P40215|NDH1_YEAST	sp|P40215|NDH1_YEAST	5	5	5	sp|P40215|NDH1_YEAST External NADH-ubiquinone oxidoreductase 1, mitochondrial OS=Saccharomyces cerevisiae (strain ATCC 204508 / S288c) GN=NDE1 PE=1 SV=1	1	5	5	5	12	12	12	62.773	560	560	0	38.814	0.53898	1.0608	18.83	8	2	Leave out requantified	231000000	151000000	80729000				303	1295;1902;2576;2781;2915	True;True;True;True;True	1372;2038;2766;2986;2987;3131	1893;2772;3774;3775;4073;4074;4075;4284	2832;4130;4131;5644;5645;5646;6080;6081;6082;6083;6084;6380	2832;4131;5645;6083;6380		258			326
sp|P40319|ELO3_YEAST	sp|P40319|ELO3_YEAST	1	1	1	sp|P40319|ELO3_YEAST Elongation of fatty acids protein 3 OS=Saccharomyces cerevisiae (strain ATCC 204508 / S288c) GN=ELO3 PE=1 SV=1	1	1	1	1	5.8	5.8	5.8	39.465	345	345	0.007772	6.189	0.35477	0.60431	NaN	1	0	Median	1734500	1265800	468640				304	2661	TRUE	2856	3896	5826	5826
sp|P40327|PRS4_YEAST	sp|P40327|PRS4_YEAST	1	1	1	sp|P40327|PRS4_YEAST 26S protease regulatory subunit 4 homolog OS=Saccharomyces cerevisiae (strain ATCC 204508 / S288c) GN=RPT2 PE=1 SV=3	1	1	1	1	4.8	4.8	4.8	48.828	437	437	0	14.128	0.62284	1.1345	NaN	1	0	Median	26308000	16202000	10106000				305	2569	TRUE	2759	3765	5631;5632	5631
sp|P40413|TCPE_YEAST	sp|P40413|TCPE_YEAST	9	9	9	sp|P40413|TCPE_YEAST T-complex protein 1 subunit epsilon OS=Saccharomyces cerevisiae (strain ATCC 204508 / S288c) GN=CCT5 PE=1 SV=3	1	9	9	9	19.4	19.4	19.4	61.913	562	562	0	57.559	0.49756	0.95683	27.255	8	1	Leave out requantified	713000000	453000000	260000000				306	120;506;762;971;1190;1339;1508;1673;2643	True;True;True;True;True;True;True;True;True	130;537;807;1027;1262;1416;1597;1779;2838	180;745;1116;1415;1746;1950;2182;2414;3873	275;276;1135;1667;2123;2619;2620;2909;3261;3592;5793	275;1135;1667;2123;2619;2909;3261;3592;5793		259;260			414;481
sp|P40433|6P21_YEAST	sp|P40433|6P21_YEAST	40	40	40	sp|P40433|6P21_YEAST 6-phosphofructo-2-kinase 1 OS=Saccharomyces cerevisiae (strain ATCC 204508 / S288c) GN=PFK26 PE=1 SV=1	1	40	40	40	61.4	61.4	61.4	93.416	827	827	0	323.31	0.80071	1.6986	18.203	60	8	Leave out requantified	20900000000	11400000000	9500000000				307	18;226;370;456;468;593;669;795;928;998;1019;1122;1128;1287;1392;1433;1569;1631;1680;1815;1816;1860;1982;2073;2075;2156;2163;2264;2289;2294;2438;2519;2633;2687;2697;2742;2818;2930;2940;2950	True;True;True;True;True;True;True;True;True;True;True;True;True;True;True;True;True;True;True;True;True;True;True;True;True;True;True;True;True;True;True;True;True;True;True;True;True;True;True;True	18;242;394;486;498;499;630;708;840;981;1054;1076;1187;1188;1194;1195;1363;1471;1516;1663;1728;1729;1787;1788;1949;1950;1951;1996;2126;2222;2224;2310;2319;2430;2457;2462;2615;2703;2828;2887;2898;2946;3029;3148;3149;3159;3169	24;349;552;678;679;695;696;873;981;982;1154;1353;1450;1451;1484;1643;1644;1652;1653;1879;2025;2026;2081;2266;2267;2350;2351;2424;2425;2652;2653;2654;2655;2710;2880;2881;3012;3015;3016;3132;3148;3149;3314;3349;3350;3351;3357;3568;3694;3695;3860;3932;3933;3946;3947;4020;4129;4304;4305;4318;4334	39;40;528;529;826;827;1022;1023;1024;1025;1052;1053;1054;1055;1304;1305;1466;1467;1722;2047;2168;2169;2170;2220;2221;2460;2461;2462;2477;2478;2479;2816;3026;3027;3115;3116;3380;3381;3382;3503;3504;3505;3606;3607;3608;3960;3961;3962;3963;3964;3965;4045;4046;4285;4286;4287;4468;4471;4472;4641;4662;4663;4664;4665;4927;4928;4982;4983;4984;4985;4992;4993;5315;5316;5513;5514;5515;5775;5776;5877;5878;58…	40;528;827;1022;1054;1305;1466;1722;2047;2169;2220;2461;2477;2816;3027;3115;3381;3505;3606;3960;3964;4045;4287;4468;4471;4641;4663;4927;4982;4992;5315;5514;5775;5878;5900;6011;6158;6409;6429;6452		261;262;263;264;265;266;267;268	15		128;188;448;471;494;506;540;721	667
sp|P40509|COPE_YEAST	sp|P40509|COPE_YEAST	17	17	17	sp|P40509|COPE_YEAST Coatomer subunit epsilon OS=Saccharomyces cerevisiae (strain ATCC 204508 / S288c) GN=SEC28 PE=1 SV=2	1	17	17	17	66.9	66.9	66.9	33.829	296	296	0	198.88	0.013419	0.031132	143.08	14	14	Median	46800000000	46600000000	133000000				308	303;531;532;572;630;914;1363;1663;1766;1770;1771;1930;2009;2012;2469;2505;2774	True;True;True;True;True;True;True;True;True;True;True;True;True;True;True;True;True	321;566;567;568;609;668;966;1441;1764;1765;1892;1896;1897;2070;2156;2159;2648;2688;2979	453;788;789;790;791;792;846;928;1327;1983;1984;2396;2397;2398;2567;2572;2573;2574;2575;2576;2577;2808;2925;2928;2929;3611;3612;3613;3614;3671;3672;3673;4063;4064	686;1188;1189;1190;1191;1192;1193;1194;1271;1386;2013;2962;2963;3570;3571;3572;3573;3822;3827;3828;3829;3830;3831;3832;3833;3834;3835;3836;3837;3838;3839;3840;3841;3842;4181;4350;4353;4354;5381;5382;5383;5384;5472;5473;5474;5475;5476;6067;6068	686;1188;1190;1271;1386;2013;2963;3570;3822;3829;3838;4181;4350;4353;5384;5474;6067		269;270			1;253
sp|P87262|RL34A_YEAST;sp|P40525|RL34B_YEAST	sp|P87262|RL34A_YEAST;sp|P40525|RL34B_YEAST	4;4	4;4	4;4	sp|P87262|RL34A_YEAST 60S ribosomal protein L34-A OS=Saccharomyces cerevisiae (strain ATCC 204508 / S288c) GN=RPL34A PE=1 SV=1;sp|P40525|RL34B_YEAST 60S ribosomal protein L34-B OS=Saccharomyces cerevisiae (strain ATCC 204508 / S288c) GN=RPL34B PE=1 SV=1	2	4	4	4	32.2	32.2	32.2	13.639	121	121;121	0	36.775	0.40771	0.91753	14.537	8	3	Leave out requantified	4770000000	3290000000	1490000000				309	48;237;2046;2070	True;True;True;True	50;253;2195;2219	68;69;361;362;363;2979;2980;3009	105;106;107;547;548;549;550;4420;4421;4422;4465	105;549;4422;4465
sp|P40546|FAF1_YEAST	sp|P40546|FAF1_YEAST	1	1	1	sp|P40546|FAF1_YEAST Protein FAF1 OS=Saccharomyces cerevisiae (strain ATCC 204508 / S288c) GN=FAF1 PE=1 SV=1	1	1	1	1	2	2	2	38.889	346	346	1	-2	NaN	NaN	NaN	0	0	Median	0	0	0	#ERROR!			310	1252	TRUE	1327	1832	2745;2746;2747	2747			16			277
sp|P40693|RLP7_YEAST	sp|P40693|RLP7_YEAST	1	1	1	sp|P40693|RLP7_YEAST Ribosome biogenesis protein RLP7 OS=Saccharomyces cerevisiae (strain ATCC 204508 / S288c) GN=RLP7 PE=1 SV=1	1	1	1	1	6.5	6.5	6.5	36.559	322	322	0.003058	10.318	0.36387	0.6733	17.367	2	2	Median	13788000	10901000	2886900				311	1969	TRUE	2113	2864;2865	4265;4266	4266
sp|P40961|PHB1_YEAST	sp|P40961|PHB1_YEAST	1	1	1	sp|P40961|PHB1_YEAST Prohibitin-1 OS=Saccharomyces cerevisiae (strain ATCC 204508 / S288c) GN=PHB1 PE=1 SV=2	1	1	1	1	7	7	7	31.427	287	287	0.007813	6.2863	0.29065	0.5377	5.7067	2	2	Median	10838000	8466400	2371600				312	2572	TRUE	2762	3768;3769	5636;5637	5636
sp|P40988|FET4_YEAST	sp|P40988|FET4_YEAST	13	13	13	sp|P40988|FET4_YEAST Low-affinity Fe(2+) transport protein OS=Saccharomyces cerevisiae (strain ATCC 204508 / S288c) GN=FET4 PE=1 SV=2	1	13	13	13	27	27	27	62.791	552	552	0	102.07	0.78397	1.5631	14.264	15	2	Leave out requantified	2140000000	1170000000	965000000				313	151;255;677;891;899;963;1084;1171;1591;2019;2047;2324;2456	True;True;True;True;True;True;True;True;True;True;True;True;True	166;272;716;717;940;949;1017;1144;1242;1685;2166;2196;2493;2635	242;386;993;994;1289;1302;1303;1400;1401;1578;1716;2293;2939;2981;3401;3594	367;368;586;1484;1485;1945;1965;1966;2103;2104;2354;2355;2570;2571;2572;2573;3419;4371;4423;4424;5062;5352;5353	367;586;1484;1945;1965;2103;2354;2573;3419;4371;4423;5062;5352		271;272			148;313
sp|P41056|RL33B_YEAST	sp|P41056|RL33B_YEAST	4	1	1	sp|P41056|RL33B_YEAST 60S ribosomal protein L33-B OS=Saccharomyces cerevisiae (strain ATCC 204508 / S288c) GN=RPL33B PE=1 SV=2	1	4	1	1	40.2	15	15	12.168	107	107	0	11.384	0.41545	0.8626	NaN	1	1	Median	359000000	247000000	113000000				314	1004;1013;2430;2728	True;False;False;False	1061;1070;2605;2932	1459;1460;1474;3554;3998;3999	2183;2184;2205;2206;5270;5271;5272;5273;5274;5275;5276;5277;5278;5279;5280;5976;5977;5978	2184;2205;5275;5978
sp|P41057|RS29A_YEAST	sp|P41057|RS29A_YEAST	6	5	5	sp|P41057|RS29A_YEAST 40S ribosomal protein S29-A OS=Saccharomyces cerevisiae (strain ATCC 204508 / S288c) GN=RPS29A PE=1 SV=3	1	6	5	5	69.6	50	50	6.6606	56	56	0	37.047	0.67236	1.3068	29.31	9	2	Leave out requantified	5420000000	3300000000	2110000000				315	78;136;483;1319;2592;2886	False;True;True;True;True;True	84;146;514;1396;2782;3100	117;118;205;206;713;1922;3793;3794;3795;4240;4241	179;180;181;182;183;317;318;319;1089;1090;2868;5673;5674;5675;5676;5677;5678;6322;6323;6324	183;317;1090;2868;5676;6322
sp|P41058|RS29B_YEAST	sp|P41058|RS29B_YEAST	6	6	5	sp|P41058|RS29B_YEAST 40S ribosomal protein S29-B OS=Saccharomyces cerevisiae (strain ATCC 204508 / S288c) GN=RPS29B PE=1 SV=3	1	6	6	5	69.6	69.6	50	6.7276	56	56	0	54.559	0.68082	1.4504	3.4936	9	2	Leave out requantified	7970000000	4070000000	3900000000				316	78;135;482;1318;2593;2863	True;True;True;True;True;True	84;145;513;1395;2783;3076	117;118;203;204;711;712;1921;3796;3797;4206	179;180;181;182;183;313;314;315;316;1086;1087;1088;2867;5679;5680;5681;6275	183;314;1088;2867;5679;6275
sp|P41277|GPP1_YEAST;sp|P40106|GPP2_YEAST	sp|P41277|GPP1_YEAST;sp|P40106|GPP2_YEAST	2;1	2;1	2;1	sp|P41277|GPP1_YEAST Glycerol-1-phosphate phosphohydrolase 1 OS=Saccharomyces cerevisiae (strain ATCC 204508 / S288c) GN=GPP1 PE=1 SV=3;sp|P40106|GPP2_YEAST Glycerol-1-phosphate phosphohydrolase 2 OS=Saccharomyces cerevisiae (strain ATCC 204508 / S288c) GN	2	2	2	2	12.8	12.8	12.8	27.947	250	250;250	0	19.023	0.34815	0.66743	16.121	2	0	Median	147000000	102000000	44706000				317	622;1972	True;True	660;2116	918;2869	1371;4272	1371;4272
sp|P41805|RL10_YEAST	sp|P41805|RL10_YEAST	18	18	18	sp|P41805|RL10_YEAST 60S ribosomal protein L10 OS=Saccharomyces cerevisiae (strain ATCC 204508 / S288c) GN=RPL10 PE=1 SV=1	1	18	18	18	66.5	66.5	66.5	25.361	221	221	0	166.1	0.44399	0.87948	13.221	30	1	Leave out requantified	12900000000	8630000000	4300000000				318	196;342;343;365;386;436;746;845;1213;1246;1316;1685;2447;2597;2660;2835;2898;2922	True;True;True;True;True;True;True;True;True;True;True;True;True;True;True;True;True;True	211;366;367;389;412;465;791;891;1285;1320;1393;1796;1797;2625;2787;2855;3047;3113;3139;3140	303;515;516;517;545;546;580;581;650;651;1091;1218;1219;1774;1775;1823;1918;1919;2438;2439;2440;3582;3802;3803;3895;4157;4158;4261;4292;4293;4294;4295	459;460;461;462;772;773;774;775;776;777;815;816;817;864;865;866;867;975;976;977;978;1633;1634;1820;1821;1822;2658;2659;2660;2661;2662;2734;2735;2863;2864;2865;3624;3625;3626;3627;3628;3629;5337;5690;5691;5692;5824;5825;6201;6202;6203;6349;6389;6390;6391;6392;6393;6394	461;774;776;817;867;976;1633;1822;2661;2734;2864;3624;5337;5690;5824;6203;6349;6393		273;274			76;102
sp|P41810|COPB_YEAST	sp|P41810|COPB_YEAST	59	59	59	sp|P41810|COPB_YEAST Coatomer subunit beta OS=Saccharomyces cerevisiae (strain ATCC 204508 / S288c) GN=SEC26 PE=1 SV=2	1	59	59	59	65.4	65.4	65.4	109.02	973	973	0	323.31	0.013675	0.030519	174.86	78	77	Median	183000000000	182000000000	1620000000				319	31;111;141;142;335;379;473;474;521;522;673;741;750;833;837;857;894;985;1042;1168;1226;1251;1271;1317;1442;1480;1510;1615;1635;1713;1714;1716;1772;1797;1856;1857;1961;1962;2078;2190;2210;2277;2295;2342;2343;2344;2484;2486;2491;2548;2650;2704;2718;2719;2720;2752;2762;2854;2964	True;True;True;True;True;True;True;True;True;True;True;True;True;True;True;True;True;True;True;True;True;True;True;True;True;True;True;True;True;True;True;True;True;True;True;True;True;True;True;True;True;True;True;True;True;True;True;True;True;True;True;True;True;True;True;True;True;True;True	32;119;120;154;155;156;358;359;403;404;504;505;553;554;555;712;785;786;795;879;883;903;904;943;944;1041;1100;1239;1298;1326;1347;1394;1526;1568;1599;1712;1733;1834;1835;1837;1898;1925;1992;1993;2102;2103;2104;2227;2347;2348;2349;2369;2444;2463;2513;2514;2515;2664;2665;2668;2673;2736;2845;2905;2920;2921;2922;2923;2924;2956;2967;3067;3183;3184	41;42;162;163;164;165;220;221;222;223;224;225;226;227;503;504;505;506;565;566;702;703;766;767;768;769;770;987;988;1080;1081;1082;1083;1096;1097;1098;1201;1202;1207;1235;1236;1237;1238;1293;1294;1295;1296;1432;1433;1517;1518;1712;1713;1794;1795;1831;1857;1858;1859;1920;2094;2148;2184;2331;2332;2356;2494;2495;2496;2497;2500;2501;2578;2579;2614;2615;2616;2704;2705;2706;2707;2850;2851;2852;2853;2854;…	62;63;249;250;251;252;253;338;339;340;341;342;343;344;345;754;755;756;757;758;759;848;849;1064;1065;1066;1162;1163;1164;1165;1166;1475;1476;1477;1619;1620;1621;1622;1639;1640;1641;1796;1797;1798;1806;1848;1849;1850;1851;1852;1951;1952;1953;1954;2144;2145;2273;2274;2275;2276;2564;2565;2695;2696;2744;2790;2791;2792;2866;3130;3131;3210;3264;3479;3480;3511;3713;3714;3715;3716;3719;3720;3843;3844;3845…	63;253;344;345;758;848;1065;1066;1163;1165;1477;1622;1639;1796;1806;1848;1954;2145;2275;2564;2696;2744;2791;2866;3130;3210;3264;3479;3511;3713;3716;3720;3845;3886;4040;4042;4247;4249;4477;4754;4793;4962;4995;5097;5100;5102;5425;5432;5444;5592;5803;5916;5947;5953;5956;6027;6049;6245;6484		275;276;277;278;279;280;281;282;283;284;285;286;287;288;289			44;51;57;62;100;138;346;378;443;463;624;714;843;859;891
sp|P41811|COPB2_YEAST	sp|P41811|COPB2_YEAST	52	52	52	sp|P41811|COPB2_YEAST Coatomer subunit beta OS=Saccharomyces cerevisiae (strain ATCC 204508 / S288c) GN=SEC27 PE=1 SV=1	1	52	52	52	72.6	72.6	72.6	99.444	889	889	0	323.31	0.008553	0.018447	180.16	44	44	Median	192000000000	191000000000	1200000000				320	119;248;310;311;328;381;382;383;418;444;508;529;534;561;562;563;605;664;665;701;723;759;784;820;871;1184;1186;1187;1273;1274;1354;1401;1534;1648;1711;1898;1904;2060;2115;2126;2181;2195;2196;2348;2564;2591;2617;2634;2649;2794;2838;2845	True;True;True;True;True;True;True;True;True;True;True;True;True;True;True;True;True;True;True;True;True;True;True;True;True;True;True;True;True;True;True;True;True;True;True;True;True;True;True;True;True;True;True;True;True;True;True;True;True;True;True;True	129;265;329;330;331;350;406;407;408;446;474;539;563;564;570;598;599;600;643;703;704;743;766;804;829;866;918;919;1256;1258;1259;1349;1350;1432;1481;1625;1746;1832;2034;2040;2209;2267;2279;2338;2354;2355;2519;2753;2781;2809;2829;2844;3002;3050;3058	178;179;378;465;466;467;492;493;569;570;571;572;573;574;625;662;663;747;748;749;782;783;784;785;786;794;832;833;834;835;892;893;976;977;1028;1055;1112;1141;1188;1257;1258;1259;1260;1736;1737;1739;1740;1741;1861;1862;1863;1864;1970;2040;2041;2042;2217;2371;2490;2491;2765;2766;2774;2997;3075;3093;3094;3179;3180;3181;3207;3208;3209;3438;3439;3440;3758;3759;3792;3831;3832;3861;3862;3880;4093;4094;416…	273;274;574;700;701;702;739;740;741;852;853;854;855;856;857;933;999;1000;1001;1137;1138;1139;1140;1180;1181;1182;1183;1184;1185;1196;1252;1253;1254;1255;1334;1335;1336;1337;1458;1459;1460;1544;1586;1660;1661;1698;1699;1777;1889;1890;1891;1892;1893;2606;2607;2609;2610;2611;2795;2796;2797;2798;2940;3060;3061;3062;3063;3064;3309;3532;3533;3707;3708;3709;4122;4123;4134;4447;4561;4591;4592;4716;4717;4…	274;574;701;702;741;853;855;857;933;1000;1139;1184;1196;1253;1254;1255;1336;1458;1460;1544;1586;1661;1698;1777;1893;2606;2609;2611;2796;2797;2940;3062;3309;3533;3709;4123;4134;4447;4561;4591;4720;4764;4766;5110;5623;5672;5734;5777;5802;6106;6211;6228		290;291;292			201;573;682
sp|P41940|MPG1_YEAST	sp|P41940|MPG1_YEAST	8	8	8	sp|P41940|MPG1_YEAST Mannose-1-phosphate guanyltransferase OS=Saccharomyces cerevisiae (strain ATCC 204508 / S288c) GN=PSA1 PE=1 SV=2	1	8	8	8	29.1	29.1	29.1	39.565	361	361	0	72.371	0.27604	0.53035	23.682	8	3	Leave out requantified	725000000	508000000	217000000				321	276;574;807;1024;1335;1351;1568;2890	True;True;True;True;True;True;True;True	294;611;852;1081;1412;1429;1662;3104	421;848;1170;1490;1944;1967;2265;4245	640;1273;1746;2231;2899;2937;3379;6329	640;1273;1746;2231;2899;2937;3379;6329
sp|P42837|FIG4_YEAST	sp|P42837|FIG4_YEAST	1	1	1	sp|P42837|FIG4_YEAST Polyphosphoinositide phosphatase OS=Saccharomyces cerevisiae (strain ATCC 204508 / S288c) GN=FIG4 PE=1 SV=1	1	1	1	1	2.4	2.4	2.4	101.74	879	879	1	-2	NaN	NaN	NaN	0	0	Median	0	0	0	#ERROR!			322	351	TRUE	375	526	787	787	2		17	738		752
sp|P42842|EMW1_YEAST	sp|P42842|EMW1_YEAST	1	1	1	sp|P42842|EMW1_YEAST Essential for maintenance of the cell wall protein 1 OS=Saccharomyces cerevisiae (strain ATCC 204508 / S288c) GN=EMW1 PE=1 SV=1	1	1	1	1	2.2	2.2	2.2	102.34	904	904	0	18.297	0.34752	0.62035	NaN	1	0	Median	39357000	29512000	9845300				323	1875	TRUE	2011	2730	4073	4073
sp|P42943|TCPH_YEAST	sp|P42943|TCPH_YEAST	4	4	4	sp|P42943|TCPH_YEAST T-complex protein 1 subunit eta OS=Saccharomyces cerevisiae (strain ATCC 204508 / S288c) GN=CCT7 PE=1 SV=1	1	4	4	4	10.5	10.5	10.5	59.735	550	550	0	44.517	0.52205	1.0241	29.643	5	1	Leave out requantified	258000000	170000000	87697000				324	725;1103;2042;2528	True;True;True;True	768;1168;2191;2714	1057;1613;1614;2973;3708	1588;1589;2412;2413;2414;4411;5534	1588;2414;4411;5534
sp|P42945|UTP10_YEAST	sp|P42945|UTP10_YEAST	2	2	2	sp|P42945|UTP10_YEAST U3 small nucleolar RNA-associated protein 10 OS=Saccharomyces cerevisiae (strain ATCC 204508 / S288c) GN=UTP10 PE=1 SV=1	1	2	2	2	1.8	1.8	1.8	200.08	1769	1769	0	11.171	0.45328	0.79864	33.234	2	1	Median	24800000	14415000	10385000				325	186;1260	True;True	201;1335	289;1840	435;2766	435;2766
sp|P43573|BUD27_YEAST	sp|P43573|BUD27_YEAST	1	1	1	sp|P43573|BUD27_YEAST Bud site selection protein 27 OS=Saccharomyces cerevisiae (strain ATCC 204508 / S288c) GN=BUD27 PE=1 SV=1	1	1	1	1	1.6	1.6	1.6	91.421	796	796	0.002688	6.591	0.17322	0.28747	NaN	1	0	Median	1424200	1188500	235680				326	1661	TRUE	1762	2394	3568	3568
sp|P43586|LOC1_YEAST	sp|P43586|LOC1_YEAST	1	1	1	sp|P43586|LOC1_YEAST 60S ribosomal subunit assembly/export protein LOC1 OS=Saccharomyces cerevisiae (strain ATCC 204508 / S288c) GN=LOC1 PE=1 SV=1	1	1	1	1	4.4	4.4	4.4	23.59	204	204	1	-2	NaN	NaN	NaN	0	0	Median	0	0	0	#ERROR!			327	313	TRUE	334	470	705	705			32			79
sp|P43588|RPN11_YEAST	sp|P43588|RPN11_YEAST	2	2	2	sp|P43588|RPN11_YEAST Ubiquitin carboxyl-terminal hydrolase RPN11 OS=Saccharomyces cerevisiae (strain ATCC 204508 / S288c) GN=RPN11 PE=1 SV=1	1	2	2	2	9.5	9.5	9.5	34.398	306	306	0	28.523	0.63835	1.1745	3.9086	2	0	Median	38030000	20684000	17347000				328	931;1249	True;True	984;1324	1356;1829	2050;2051;2741;2742	2051;2742
sp|P43621|COPD_YEAST	sp|P43621|COPD_YEAST	22	22	22	sp|P43621|COPD_YEAST Coatomer subunit delta OS=Saccharomyces cerevisiae (strain ATCC 204508 / S288c) GN=RET2 PE=1 SV=3	1	22	22	22	48.7	48.7	48.7	60.627	546	546	0	302.9	0.011984	0.02482	193.16	23	23	Median	49900000000	49600000000	357000000				329	51;55;65;287;465;535;597;905;957;1129;1248;1330;1786;1787;1926;1973;2024;2125;2157;2433;2695;2813	True;True;True;True;True;True;True;True;True;True;True;True;True;True;True;True;True;True;True;True;True;True	53;57;67;68;305;495;571;572;634;956;957;1011;1196;1322;1323;1407;1914;1915;2065;2066;2117;2171;2278;2311;2312;2313;2610;2896;3023	73;74;75;79;93;94;433;434;690;795;796;797;879;880;1312;1313;1314;1315;1392;1654;1655;1825;1826;1827;1828;1938;1939;2600;2601;2602;2603;2802;2803;2870;2946;2947;3091;3092;3133;3134;3135;3136;3137;3138;3139;3562;3943;3944;4121;4122	113;114;115;116;117;122;144;145;146;147;148;659;660;1042;1197;1198;1199;1200;1313;1314;1315;1981;1982;1983;1984;2095;2480;2481;2737;2738;2739;2740;2892;2893;2894;3868;3869;3870;3871;4172;4173;4174;4273;4380;4381;4589;4590;4642;4643;4644;4645;4646;4647;4648;4649;4650;5305;5306;5894;5895;6146;6147;6148;6149	115;122;145;660;1042;1200;1315;1984;2095;2480;2738;2893;3870;3871;4172;4273;4381;4590;4644;5305;5894;6149		293;294;295;296;297;298	33		138;180;251;496;515;522	277
sp|P46654|RSSA2_YEAST	sp|P46654|RSSA2_YEAST	11	11	1	sp|P46654|RSSA2_YEAST 40S ribosomal protein S0-B OS=Saccharomyces cerevisiae (strain ATCC 204508 / S288c) GN=RPS0B PE=1 SV=2	1	11	11	1	60.7	60.7	2.8	27.962	252	252	0	158.7	0.37966	0.8425	15.225	18	2	Leave out requantified	17300000000	12300000000	5050000000				330	402;615;707;1038;1360;1632;1892;1893;1908;2234;2506	True;True;True;True;True;True;True;True;True;True;True	429;653;749;1096;1438;1730;2028;2029;2044;2393;2394;2689;2690	603;907;908;1036;1511;1512;1979;1980;2352;2353;2755;2756;2757;2758;2759;2778;3260;3261;3262;3674;3675	899;1354;1355;1356;1357;1555;1556;2264;2265;2266;2267;2956;2957;2958;2959;3506;3507;3508;4105;4106;4107;4108;4109;4110;4111;4112;4138;4834;4835;4836;4837;4838;5477;5478;5479;5480	899;1356;1555;2264;2958;3508;4106;4107;4138;4836;5477		217	4		198	2
sp|P46784|RS10B_YEAST	sp|P46784|RS10B_YEAST	6	6	1	sp|P46784|RS10B_YEAST 40S ribosomal protein S10-B OS=Saccharomyces cerevisiae (strain ATCC 204508 / S288c) GN=RPS10B PE=1 SV=1	1	6	6	1	59	59	7.6	12.738	105	105	0	58.754	0.28347	0.56703	17.203	9	1	Leave out requantified	2820000000	2180000000	637000000				331	130;610;892;1037;1217;1829	True;True;True;True;True;True	140;648;941;1095;1289;1964	195;196;899;900;1290;1291;1509;1510;1781;2670	300;301;302;303;304;1345;1346;1347;1946;1947;1948;1949;2261;2262;2263;2670;2671;2672;2673;2674;2675;2676;2677;3987;3988	301;1347;1949;2263;2671;3987
sp|P46956|PHO86_YEAST	sp|P46956|PHO86_YEAST	1	1	1	sp|P46956|PHO86_YEAST Inorganic phosphate transporter PHO86 OS=Saccharomyces cerevisiae (strain ATCC 204508 / S288c) GN=PHO86 PE=1 SV=1	1	1	1	1	2.9	2.9	2.9	34.881	311	311	0.007519	5.9658	0.37622	0.68978	NaN	1	0	Median	27864000	20004000	7859700				332	1482	TRUE	1570	2150	3212	3212
sp|P46990|RL17B_YEAST	sp|P46990|RL17B_YEAST	10	10	1	sp|P46990|RL17B_YEAST 60S ribosomal protein L17-B OS=Saccharomyces cerevisiae (strain ATCC 204508 / S288c) GN=RPL17B PE=1 SV=2	1	10	10	1	50.5	50.5	5.4	20.551	184	184	0	138.56	0.48309	1.0509	12.453	18	1	Leave out requantified	12300000000	8150000000	4180000000				333	570;687;719;1109;1110;1658;2871;2872;2878;2902	True;True;True;True;True;True;True;True;True;True	607;728;762;1174;1175;1756;3085;3086;3092;3117	844;1007;1008;1049;1050;1623;1624;1625;1626;2386;2387;4216;4217;4218;4228;4229;4268;4269	1269;1503;1504;1505;1506;1578;1579;1580;1581;2426;2427;2428;2429;3555;3556;3557;3558;6289;6290;6291;6292;6306;6307;6308;6309;6359;6360;6361	1269;1504;1579;2426;2428;3558;6289;6291;6309;6360
sp|P47006|RPA34_YEAST	sp|P47006|RPA34_YEAST	14	14	14	sp|P47006|RPA34_YEAST DNA-directed RNA polymerase I subunit RPA34 OS=Saccharomyces cerevisiae (strain ATCC 204508 / S288c) GN=RPA34 PE=1 SV=1	1	14	14	14	62.2	62.2	62.2	26.875	233	233	0	190.24	0.92848	1.9311	10.251	31	5	Leave out requantified	18500000000	9310000000	9230000000				334	322;359;693;1099;1116;1377;1378;1754;1755;2021;2172;2236;2237;2635	True;True;True;True;True;True;True;True;True;True;True;True;True;True	343;383;734;1160;1161;1162;1181;1455;1456;1879;1880;2168;2329;2396;2397;2398;2399;2830	483;484;538;1015;1016;1601;1602;1603;1604;1605;1606;1607;1635;1636;2001;2002;2003;2004;2554;2555;2941;2942;3162;3264;3265;3266;3267;3268;3269;3863;3864	726;727;728;729;730;806;1517;1518;1519;1520;1521;1522;1523;1524;1525;2391;2392;2393;2394;2395;2396;2397;2398;2399;2400;2440;2441;2442;2443;2991;2992;2993;2994;2995;2996;3798;3799;3800;3801;3802;3803;4373;4374;4375;4688;4689;4690;4840;4841;4842;4843;4844;4845;4846;4847;4848;5779;5780;5781;5782	729;806;1524;2396;2443;2994;2995;3799;3803;4375;4690;4841;4847;5782		299;300;301			80;90;107
sp|P47079|TCPQ_YEAST	sp|P47079|TCPQ_YEAST	15	15	15	sp|P47079|TCPQ_YEAST T-complex protein 1 subunit theta OS=Saccharomyces cerevisiae (strain ATCC 204508 / S288c) GN=CCT8 PE=1 SV=1	1	15	15	15	38.9	38.9	38.9	61.662	568	568	0	118.14	0.44537	0.8373	16.898	16	2	Leave out requantified	1550000000	1030000000	515000000				335	85;154;619;744;859;991;1063;1100;1409;1494;1958;2449;2495;2584;2880	True;True;True;True;True;True;True;True;True;True;True;True;True;True;True	91;169;657;789;906;1047;1122;1163;1489;1582;2099;2628;2677;2774;3094	128;245;913;1087;1088;1242;1440;1549;1608;2050;2163;2847;3585;3657;3784;4231	198;371;1365;1628;1629;1858;2155;2315;2401;3074;3233;4242;5341;5449;5450;5658;6311	198;371;1365;1628;1858;2155;2315;2401;3074;3233;4242;5341;5449;5658;6311		302;303;304;305			96;104;213;546
sp|P47112|CDT1_YEAST	sp|P47112|CDT1_YEAST	1	1	1	sp|P47112|CDT1_YEAST Cell division cycle protein CDT1 OS=Saccharomyces cerevisiae (strain ATCC 204508 / S288c) GN=TAH11 PE=1 SV=1	1	1	1	1	2.2	2.2	2.2	68.404	604	604	0.002695	6.5993	0.43171	0.80012	NaN	1	0	Median	8744100	6617600	2126500				336	210	TRUE	225	323	490	490
sp|P47154|STE24_YEAST	sp|P47154|STE24_YEAST	1	1	1	sp|P47154|STE24_YEAST CAAX prenyl protease 1 OS=Saccharomyces cerevisiae (strain ATCC 204508 / S288c) GN=STE24 PE=1 SV=1	1	1	1	1	3.5	3.5	3.5	52.323	453	453	0	12.234	0.10908	0.21597	NaN	1	1	Median	66611000	57104000	9507000				337	1544	TRUE	1638	2236	3339	3339
sp|P47169|MET5_YEAST	sp|P47169|MET5_YEAST	3	3	3	sp|P47169|MET5_YEAST Sulfite reductase [NADPH] subunit beta OS=Saccharomyces cerevisiae (strain ATCC 204508 / S288c) GN=MET5 PE=1 SV=1	1	3	3	3	3.8	3.8	3.8	161.22	1442	1442	0	31.426	0.53089	0.95565	30.439	3	0	Leave out requantified	92275000	55853000	36422000				338	293;977;2374	True;True;True	311;1033;2545	441;1422;3473	669;2131;5153	669;2131;5153
sp|P48164|RS7B_YEAST	sp|P48164|RS7B_YEAST	9	4	4	sp|P48164|RS7B_YEAST 40S ribosomal protein S7-B OS=Saccharomyces cerevisiae (strain ATCC 204508 / S288c) GN=RPS7B PE=1 SV=1	1	9	4	4	52.1	30.5	30.5	21.634	190	190	0	38.886	0.46786	1.0605	15.82	5	1	Leave out requantified	1920000000	1270000000	643000000				339	134;361;952;1091;1384;2403;2478;2692;2917	True;False;False;True;False;True;False;True;False	144;385;1006;1152;1463;2574;2657;2892;2893;3133	202;540;541;1387;1588;2013;2014;3513;3625;3626;3938;3939;4286	311;312;808;809;810;811;2089;2090;2371;2372;3007;3008;3009;3010;5211;5212;5405;5406;5407;5408;5886;5887;5888;6382	311;810;2089;2371;3009;5211;5406;5886;6382		306			129
sp|P48589|RS12_YEAST	sp|P48589|RS12_YEAST	4	4	4	sp|P48589|RS12_YEAST 40S ribosomal protein S12 OS=Saccharomyces cerevisiae (strain ATCC 204508 / S288c) GN=RPS12 PE=1 SV=1	1	4	4	4	25.9	25.9	25.9	15.471	143	143	0	43.635	0.37022	0.74561	17.616	5	0	Leave out requantified	1930000000	1420000000	516000000				340	1625;1626;2367;2807	True;True;True;True	1722;1723;2538;3015	2343;2344;2345;3464;4110	3493;3494;3495;3496;3497;5141;5142;6130;6131	3493;3496;5141;6131
sp|P49166|RL37A_YEAST	sp|P49166|RL37A_YEAST	2	2	1	sp|P49166|RL37A_YEAST 60S ribosomal protein L37-A OS=Saccharomyces cerevisiae (strain ATCC 204508 / S288c) GN=RPL37A PE=1 SV=2	1	2	2	1	20.5	20.5	12.5	9.8502	88	88	0	13.534	0.45507	0.86079	0.2093	2	0	Median	112000000	77299000	34905000				341	2176;2380	True;True	2333;2551	3172;3483	4704;4705;4706;4707;4708;5165;5166	4706;5166
sp|P49167|RL38_YEAST	sp|P49167|RL38_YEAST	3	3	3	sp|P49167|RL38_YEAST 60S ribosomal protein L38 OS=Saccharomyces cerevisiae (strain ATCC 204508 / S288c) GN=RPL38 PE=1 SV=1	1	3	3	3	41	41	41	8.8264	78	78	0	19.216	0.35422	0.66626	39.819	4	1	Leave out requantified	1840000000	1290000000	549000000				342	848;1464;1965	True;True;True	894;1551;2109	1222;2126;2127;2860	1825;3175;3176;3177;3178;3179;4260	1825;3175;4260
sp|P49626|RL4B_YEAST	sp|P49626|RL4B_YEAST	17	1	1	sp|P49626|RL4B_YEAST 60S ribosomal protein L4-B OS=Saccharomyces cerevisiae (strain ATCC 204508 / S288c) GN=RPL4B PE=1 SV=2	1	17	1	1	68	3.9	3.9	39.062	362	362	0.003003	8.7732	0.41487	0.97038	4.8621	2	0	Median	1480000000	1050000000	432000000				343	64;205;404;716;832;1052;1053;1118;1371;1887;1950;2058;2167;2287;2422;2657;2857	False;False;False;False;False;False;False;False;False;False;False;False;False;False;True;False;False	66;220;431;758;878;1110;1111;1183;1449;2023;2090;2207;2323;2324;2455;2595;2852;3070	91;92;313;314;605;1045;1200;1531;1532;1533;1638;1639;1993;2746;2747;2748;2835;2993;2994;2995;3154;3155;3156;3346;3347;3540;3541;3890;3891;4196;4197	140;141;142;143;474;475;476;902;903;1568;1569;1795;2292;2293;2294;2295;2296;2297;2298;2448;2449;2450;2451;2452;2453;2454;2455;2975;2976;2977;2978;4091;4092;4093;4094;4095;4225;4226;4443;4444;4445;4670;4671;4672;4673;4674;4675;4979;4980;5249;5250;5251;5817;5818;5819;6252;6253;6254;6255;6256;6257;6258;6259;6260;6261	140;475;903;1568;1795;2293;2298;2450;2975;4095;4226;4444;4674;4980;5251;5819;6259		139			93
sp|P50276|MUP1_YEAST	sp|P50276|MUP1_YEAST	2	2	2	sp|P50276|MUP1_YEAST High-affinity methionine permease OS=Saccharomyces cerevisiae (strain ATCC 204508 / S288c) GN=MUP1 PE=1 SV=1	1	2	2	2	3.1	3.1	3.1	63.221	574	574	0	13.842	0.47518	0.86881	0.84474	2	1	Median	97197000	62486000	34711000				344	1056;2405	True;True	1114;2576	1536;3516	2302;5216	2302;5216
sp|P51401|RL9B_YEAST	sp|P51401|RL9B_YEAST	9	1	1	sp|P51401|RL9B_YEAST 60S ribosomal protein L9-B OS=Saccharomyces cerevisiae (strain ATCC 204508 / S288c) GN=RPL9B PE=1 SV=1	1	9	1	1	38.7	3.7	3.7	21.657	191	191	0.002681	6.5902	NaN	NaN	NaN	0	0	Median	0	0	0				345	662;766;919;1234;1250;1748;2246;2729;2971	False;True;False;False;False;False;False;False;False	701;811;971;1307;1325;1871;2408;2409;2933;3193	973;974;1120;1336;1805;1806;1830;2544;3283;3284;4000;4001;4373;4374	1454;1455;1456;1671;2025;2026;2708;2709;2743;3782;4871;4872;4873;4874;5979;5980;5981;6509;6510;6511	1456;1671;2026;2709;2743;3782;4874;5979;6510		61;307			78;191
sp|P53039|YIP1_YEAST	sp|P53039|YIP1_YEAST	1	1	1	sp|P53039|YIP1_YEAST Protein transport protein YIP1 OS=Saccharomyces cerevisiae (strain ATCC 204508 / S288c) GN=YIP1 PE=1 SV=1	1	1	1	1	8.9	8.9	8.9	27.08	248	248	0.002639	6.4078	0.3466	0.64151	NaN	1	0	Median	6230000	4824100	1405900				346	877	TRUE	925	1269	1909	1909
sp|P53045|MSMO_YEAST	sp|P53045|MSMO_YEAST	1	1	1	sp|P53045|MSMO_YEAST Methylsterol monooxygenase OS=Saccharomyces cerevisiae (strain ATCC 204508 / S288c) GN=ERG25 PE=1 SV=1	1	1	1	1	2.9	2.9	2.9	36.479	309	309	0.007407	5.8877	0.17457	0.32747	NaN	1	0	Median	109000000	93122000	15942000				347	1394	TRUE	1473	2028	3030	3030
sp|P53064|RTF1_YEAST	sp|P53064|RTF1_YEAST	33	33	33	sp|P53064|RTF1_YEAST RNA polymerase-associated protein RTF1 OS=Saccharomyces cerevisiae (strain ATCC 204508 / S288c) GN=RTF1 PE=1 SV=2	1	33	33	33	46.6	46.6	46.6	65.868	558	558	0	323.31	0.73012	1.4749	13.319	55	6	Leave out requantified	15500000000	8810000000	6660000000				348	112;416;426;457;461;486;515;577;579;601;602;627;731;912;913;1222;1264;1270;1413;1525;1549;1583;1708;1813;2065;2317;2448;2524;2631;2735;2736;2827;2897	True;True;True;True;True;True;True;True;True;True;True;True;True;True;True;True;True;True;True;True;True;True;True;True;True;True;True;True;True;True;True;True;True	121;444;454;487;491;517;546;614;616;638;639;640;665;774;964;965;1294;1340;1346;1493;1616;1643;1677;1827;1828;1947;2214;2486;2626;2627;2709;2826;2939;2940;3038;3111;3112	166;167;168;621;622;636;637;680;685;717;718;756;851;853;854;855;856;886;887;888;925;1063;1064;1324;1325;1326;1789;1790;1846;1856;2054;2206;2207;2241;2242;2243;2244;2284;2285;2484;2485;2486;2649;2650;3003;3391;3392;3583;3584;3702;3857;3858;4011;4012;4013;4145;4256;4257;4258;4259;4260	254;255;256;257;258;928;929;955;956;957;958;1026;1032;1033;1034;1035;1036;1037;1096;1097;1098;1148;1149;1277;1278;1281;1282;1283;1284;1325;1326;1327;1380;1381;1595;1596;1996;1997;1998;1999;2000;2001;2002;2003;2004;2005;2006;2007;2008;2009;2010;2011;2012;2689;2690;2691;2774;2775;2788;2789;3078;3293;3294;3295;3350;3351;3352;3353;3354;3355;3403;3404;3405;3406;3698;3699;3700;3943;3944;3945;3946;3947;…	258;928;957;1026;1034;1098;1148;1277;1284;1325;1327;1380;1596;2005;2009;2689;2774;2789;3078;3295;3354;3404;3699;3954;4457;5049;5339;5528;5773;5996;5998;6184;6344		308;309;310;311;312;313			101;303;350;366;463;546
sp|P53070|MTO1_YEAST	sp|P53070|MTO1_YEAST	1	1	1	sp|P53070|MTO1_YEAST Mitochondrial translation optimization protein 1 OS=Saccharomyces cerevisiae (strain ATCC 204508 / S288c) GN=MTO1 PE=1 SV=2	1	1	1	1	3.3	3.3	3.3	74.215	669	669	0.007335	5.8174	0.74058	1.3547	NaN	1	1	Median	3666700	2330600	1336100				349	1656	TRUE	1754	2384	3552	3552
sp|P53090|ARO8_YEAST	sp|P53090|ARO8_YEAST	1	1	1	sp|P53090|ARO8_YEAST Aromatic/aminoadipate aminotransferase 1 OS=Saccharomyces cerevisiae (strain ATCC 204508 / S288c) GN=ARO8 PE=1 SV=1	1	1	1	1	2.8	2.8	2.8	56.177	500	500	0.007557	5.9874	0.86203	1.5967	NaN	1	0	Median	9462300	5340700	4121700				350	2139	TRUE	2292	3111	4614	4614
sp|P53115|INO80_YEAST	sp|P53115|INO80_YEAST	1	1	1	sp|P53115|INO80_YEAST Putative DNA helicase INO80 OS=Saccharomyces cerevisiae (strain ATCC 204508 / S288c) GN=INO80 PE=1 SV=1	1	1	1	1	0.7	0.7	0.7	171.45	1489	1489	1	-2	NaN	NaN	NaN	0	0	Median	0	0	0	#ERROR!			351	1768	TRUE	1894	2569	3824	3824			18			623
sp|P53128|MTHR2_YEAST	sp|P53128|MTHR2_YEAST	9	9	9	sp|P53128|MTHR2_YEAST Methylenetetrahydrofolate reductase 2 OS=Saccharomyces cerevisiae (strain ATCC 204508 / S288c) GN=MET13 PE=1 SV=2	1	9	9	9	17.8	17.8	17.8	68.559	600	600	0	57.69	0.41444	0.80674	28.038	9	3	Leave out requantified	642000000	409000000	233000000				352	476;1138;1367;1368;1517;1738;2038;2520;2533	True;True;True;True;True;True;True;True;True	507;1206;1445;1446;1606;1860;2186;2704;2719	705;1665;1988;1989;2192;2532;2965;3696;3714	1069;1070;2495;2496;2968;2969;3272;3764;4402;5516;5542;5543	1069;2495;2968;2969;3272;3764;4402;5516;5543
sp|P53131|PRP43_YEAST	sp|P53131|PRP43_YEAST	1	1	1	sp|P53131|PRP43_YEAST Pre-mRNA-splicing factor ATP-dependent RNA helicase PRP43 OS=Saccharomyces cerevisiae (strain ATCC 204508 / S288c) GN=PRP43 PE=1 SV=1	1	1	1	1	1.6	1.6	1.6	87.561	767	767	0.007712	6.068	0.41735	0.75988	NaN	1	0	Median	3353000	2457700	895300				353	2454	TRUE	2633	3591	5349	5349		314			228
sp|P53145|LSG1_YEAST	sp|P53145|LSG1_YEAST	1	1	1	sp|P53145|LSG1_YEAST Large subunit GTPase 1 OS=Saccharomyces cerevisiae (strain ATCC 204508 / S288c) GN=LSG1 PE=1 SV=1	1	1	1	1	4.1	4.1	4.1	72.727	640	640	0	11.503	0.39602	0.73038	NaN	1	1	Median	11961000	9364600	2596900				354	2345	TRUE	2516	3434	5103	5103
sp|P53163|MNP1_YEAST	sp|P53163|MNP1_YEAST	2	2	2	sp|P53163|MNP1_YEAST 54S ribosomal protein L12, mitochondrial OS=Saccharomyces cerevisiae (strain ATCC 204508 / S288c) GN=MNP1 PE=1 SV=1	1	2	2	2	14.9	14.9	14.9	20.65	194	194	0	16.046	0.69215	1.3263	71.222	2	0	Median	79444000	38897000	40547000				355	1170;2459	True;True	1241;2638	1715;3598	2568;2569;5359	2568;5359
sp|P53221|RL26B_YEAST;sp|P05743|RL26A_YEAST	sp|P53221|RL26B_YEAST;sp|P05743|RL26A_YEAST	12;10	12;10	12;10	sp|P53221|RL26B_YEAST 60S ribosomal protein L26-B OS=Saccharomyces cerevisiae (strain ATCC 204508 / S288c) GN=RPL26B PE=1 SV=2;sp|P05743|RL26A_YEAST 60S ribosomal protein L26-A OS=Saccharomyces cerevisiae (strain ATCC 204508 / S288c) GN=RPL26A PE=1 SV=3	2	12	12	12	55.1	55.1	55.1	14.235	127	127;127	0	125.27	0.042314	0.095388	13.338	20	5	Leave out requantified	34700000000	33300000000	1460000000				356	227;265;492;625;1215;1434;2027;2028;2052;2087;2703;2724	True;True;True;True;True;True;True;True;True;True;True;True	243;283;523;663;1287;1517;2174;2175;2201;2236;2904;2928	350;403;404;725;726;727;921;922;1777;1778;2082;2083;2950;2951;2952;2953;2987;3032;3956;3957;3992;3993	530;612;613;614;1108;1109;1110;1374;1375;1376;1377;2664;2665;2666;3117;3118;4385;4386;4387;4388;4431;4432;4503;5912;5913;5914;5915;5965;5966;5967;5968	530;614;1110;1376;2664;3118;4386;4387;4431;4503;5915;5965
sp|P53252|PIL1_YEAST	sp|P53252|PIL1_YEAST	1	1	1	sp|P53252|PIL1_YEAST Sphingolipid long chain base-responsive protein PIL1 OS=Saccharomyces cerevisiae (strain ATCC 204508 / S288c) GN=PIL1 PE=1 SV=1	1	1	1	1	2.7	2.7	2.7	38.349	339	339	1	-2	0.42929	0.7903	NaN	1	1	Median	12961000	8643700	4317600	#ERROR!			357	2251	TRUE	2414	3292	4890	4890		315			72
sp|P53549|PRS10_YEAST	sp|P53549|PRS10_YEAST	4	4	4	sp|P53549|PRS10_YEAST 26S protease subunit RPT4 OS=Saccharomyces cerevisiae (strain ATCC 204508 / S288c) GN=RPT4 PE=1 SV=4	1	4	4	4	14.6	14.6	14.6	49.408	437	437	0	25.496	0.51369	0.91664	26.276	4	1	Leave out requantified	212000000	145000000	66622000				358	594;1048;1261;2475	True;True;True;True	631;1106;1336;2654	874;1524;1841;3622	1306;2282;2767;5400	1306;2282;2767;5400		316			325
sp|P53600|COPZ_YEAST	sp|P53600|COPZ_YEAST	6	6	6	sp|P53600|COPZ_YEAST Coatomer subunit zeta OS=Saccharomyces cerevisiae (strain ATCC 204508 / S288c) GN=RET3 PE=1 SV=1	1	6	6	6	32.3	32.3	32.3	21.687	189	189	0	41.648	0.092206	0.17814	113.66	7	7	Median	753000000	715000000	38204000				359	739;740;768;2124;2758;2973	True;True;True;True;True;True	782;783;784;813;2277;2962;2963;3195	1076;1077;1078;1079;1122;3090;4040;4041;4376	1615;1616;1617;1618;1673;4588;6036;6037;6513	1615;1618;1673;4588;6037;6513		317;318			115;162
sp|P53622|COPA_YEAST	sp|P53622|COPA_YEAST	80	80	80	sp|P53622|COPA_YEAST Coatomer subunit alpha OS=Saccharomyces cerevisiae (strain ATCC 204508 / S288c) GN=COP1 PE=1 SV=2	1	80	80	80	73.3	73.3	73.3	135.61	1201	1201	0	323.31	0.086015	0.18122	99.533	103	100	Leave out requantified	414000000000	412000000000	2300000000				360	27;138;139;223;225;244;344;380;412;440;518;556;595;596;608;621;632;633;634;640;657;724;783;788;799;870;924;944;949;1016;1057;1067;1152;1153;1182;1183;1188;1263;1266;1309;1380;1463;1516;1520;1537;1538;1577;1649;1667;1682;1695;1749;1753;1775;1784;1851;1867;1917;1934;1984;2015;2059;2092;2171;2199;2297;2446;2485;2563;2580;2761;2822;2824;2840;2876;2945;2946;2947;2965;2968	True;True;True;True;True;True;True;True;True;True;True;True;True;True;True;True;True;True;True;True;True;True;True;True;True;True;True;True;True;True;True;True;True;True;True;True;True;True;True;True;True;True;True;True;True;True;True;True;True;True;True;True;True;True;True;True;True;True;True;True;True;True;True;True;True;True;True;True;True;True;True;True;True;True;True;True;True;True;True;True	28;148;149;150;151;239;241;261;368;405;439;440;470;549;593;632;633;646;659;670;671;672;679;696;767;828;833;844;917;977;997;998;1003;1073;1115;1126;1221;1222;1223;1224;1254;1255;1260;1338;1339;1342;1386;1458;1459;1549;1550;1605;1609;1630;1631;1671;1747;1771;1791;1792;1809;1810;1872;1878;1901;1911;1912;1986;2003;2054;2074;2129;2162;2208;2241;2328;2358;2465;2624;2666;2667;2752;2770;2966;3033;3035;30…	37;209;210;211;212;213;214;345;346;348;373;518;519;567;568;615;616;657;658;760;761;762;823;824;825;875;876;877;878;897;916;917;930;931;932;933;934;945;946;947;967;1056;1138;1139;1140;1145;1146;1158;1159;1160;1256;1344;1345;1346;1371;1372;1373;1374;1375;1376;1383;1384;1480;1537;1553;1554;1689;1690;1691;1692;1693;1694;1695;1733;1734;1735;1742;1743;1843;1844;1845;1849;1850;1851;1909;1910;2006;2007;2…	58;325;326;327;328;329;330;524;525;527;566;567;778;779;850;851;917;918;919;920;990;991;992;1153;1154;1155;1156;1157;1158;1237;1238;1239;1307;1308;1309;1310;1311;1312;1343;1368;1369;1370;1388;1389;1390;1391;1392;1393;1394;1412;1413;1414;1444;1445;1587;1693;1694;1695;1696;1697;1708;1709;1710;1711;1726;1727;1728;1729;1730;1888;2036;2037;2038;2068;2069;2070;2071;2072;2073;2074;2083;2084;2085;2086;221…	58;326;330;524;527;567;778;850;917;992;1158;1239;1309;1312;1343;1370;1390;1393;1394;1414;1444;1587;1697;1710;1729;1888;2038;2073;2083;2214;2303;2320;2533;2538;2604;2605;2614;2773;2781;2853;3003;3174;3271;3276;3321;3324;3395;3535;3582;3615;3648;3786;3796;3849;3865;4026;4060;4156;4186;4292;4361;4446;4509;4686;4772;5001;5334;5427;5620;5653;6042;6166;6174;6214;6301;6443;6446;6447;6487;6502		319;320;321;322;323;324;325;326;327;328;329;330			42;185;510;528;696;723;736;795;1024;1065;1090;1132
sp|P53723|YN8B_YEAST	sp|P53723|YN8B_YEAST	2	2	2	sp|P53723|YN8B_YEAST UPF0674 endoplasmic reticulum membrane protein YNR021W OS=Saccharomyces cerevisiae (strain ATCC 204508 / S288c) GN=YNR021W PE=1 SV=3	1	2	2	2	7.7	7.7	7.7	47.093	404	404	0	11.866	0.34572	0.60285	0.004272	2	1	Median	6684100	4965400	1718700				361	827;2305	True;True	873;2474	1195;3376	1786;5017	1786;5017
sp|P53736|YN8O_YEAST	sp|P53736|YN8O_YEAST	1	1	1	sp|P53736|YN8O_YEAST Uncharacterized protein YNR040W OS=Saccharomyces cerevisiae (strain ATCC 204508 / S288c) GN=YNR040W PE=1 SV=1	1	1	1	1	7.4	7.4	7.4	28.636	256	256	0.0075	5.9448	0.35722	0.66017	0.18328	2	0	Median	10366000	7569300	2797000				362	2402	TRUE	2573	3511;3512	5206;5207;5208;5209;5210	5209
sp|P53742|NOG2_YEAST	sp|P53742|NOG2_YEAST	2	2	2	sp|P53742|NOG2_YEAST Nucleolar GTP-binding protein 2 OS=Saccharomyces cerevisiae (strain ATCC 204508 / S288c) GN=NOG2 PE=1 SV=1	1	2	2	2	4.9	4.9	4.9	55.488	486	486	0	13.452	1.5201	2.6889	NaN	1	1	Median	42794000	12850000	29944000				363	17;262	True;True	17;280	23;397	38;605	38;605
sp|P53849|GIS2_YEAST	sp|P53849|GIS2_YEAST	2	2	2	sp|P53849|GIS2_YEAST Zinc finger protein GIS2 OS=Saccharomyces cerevisiae (strain ATCC 204508 / S288c) GN=GIS2 PE=1 SV=1	1	2	2	2	15.7	15.7	15.7	17.103	153	153	0	13.86	0.42215	0.79972	0.71752	2	0	Median	114000000	75342000	38403000				364	235;1951	True;True	251;2091	359;2836	545;4227	545;4227
sp|P53914|NAT10_YEAST	sp|P53914|NAT10_YEAST	2	2	2	sp|P53914|NAT10_YEAST RNA cytidine acetyltransferase OS=Saccharomyces cerevisiae (strain ATCC 204508 / S288c) GN=NAT10 PE=1 SV=1	1	2	2	2	2.7	2.7	2.7	119.35	1056	1056	0	16.139	0.39926	0.72504	14.3	2	0	Median	55888000	41370000	14518000				365	1406;2552	True;True	1486;2740	2047;3744	3070;5600;5601	3070;5600
sp|P54785|MOT3_YEAST	sp|P54785|MOT3_YEAST	5	5	5	sp|P54785|MOT3_YEAST Transcriptional activator/repressor MOT3 OS=Saccharomyces cerevisiae (strain ATCC 204508 / S288c) GN=MOT3 PE=1 SV=1	1	5	5	5	11.2	11.2	11.2	54.381	490	490	0	33.269	0.70527	1.332	10.513	5	0	Leave out requantified	930000000	553000000	377000000				366	324;951;2465;2705;2894	True;True;True;True;True	345;1005;2644;2906;3108	487;1386;3607;3959;3960;4252	733;2088;5376;5917;5918;6339	733;2088;5376;5918;6339		331			393
sp|P54837|TMEDA_YEAST	sp|P54837|TMEDA_YEAST	1	1	1	sp|P54837|TMEDA_YEAST Endoplasmic reticulum vesicle protein 25 OS=Saccharomyces cerevisiae (strain ATCC 204508 / S288c) GN=ERV25 PE=1 SV=1	1	1	1	1	7.6	7.6	7.6	24.106	211	211	0.002907	7.6266	0.35036	0.64853	NaN	1	1	Median	6403000	5233300	1169700				367	2608	TRUE	2799	3819	5715	5715
sp|P60010|ACT_YEAST	sp|P60010|ACT_YEAST	12	12	12	sp|P60010|ACT_YEAST Actin OS=Saccharomyces cerevisiae (strain ATCC 204508 / S288c) GN=ACT1 PE=1 SV=1	1	12	12	12	44.8	44.8	44.8	41.689	375	375	0	88.691	0.50439	0.94862	21.728	15	6	Leave out requantified	2070000000	1400000000	665000000				368	62;150;204;318;349;479;942;1040;1185;2349;2526;2932	True;True;True;True;True;True;True;True;True;True;True;True	64;164;165;219;339;373;510;995;1098;1257;2520;2712;3151	89;239;240;241;312;476;524;708;1368;1369;1514;1738;3441;3705;4307	138;364;365;366;473;715;785;1075;2065;2066;2269;2270;2608;5111;5112;5531;6412	138;364;473;715;785;1075;2065;2269;2608;5112;5531;6412		332;333;334;335;336;337			44;47;82;190;283;325
sp|P61830|H3_YEAST	sp|P61830|H3_YEAST	1	1	1	sp|P61830|H3_YEAST Histone H3 OS=Saccharomyces cerevisiae (strain ATCC 204508 / S288c) GN=HHT1 PE=1 SV=2	1	1	1	1	5.1	5.1	5.1	15.356	136	136	0.007673	6.0476	0.41747	0.78963	NaN	1	0	Median	156000000	112000000	43791000				369	2315	TRUE	2484	3388	5035	5035
sp|P89105|CTR9_YEAST	sp|P89105|CTR9_YEAST	41	41	41	sp|P89105|CTR9_YEAST RNA polymerase-associated protein CTR9 OS=Saccharomyces cerevisiae (strain ATCC 204508 / S288c) GN=CTR9 PE=1 SV=3	1	41	41	41	40.6	40.6	40.6	124.71	1077	1077	0	323.31	0.73966	1.425	13.148	55	8	Leave out requantified	12200000000	5740000000	6450000000				370	81;88;97;114;129;180;230;337;339;394;435;443;455;516;557;757;834;999;1015;1020;1131;1269;1272;1420;1423;1448;1547;1701;1819;1837;1873;1905;2145;2154;2159;2228;2229;2341;2366;2516;2615	True;True;True;True;True;True;True;True;True;True;True;True;True;True;True;True;True;True;True;True;True;True;True;True;True;True;True;True;True;True;True;True;True;True;True;True;True;True;True;True;True	87;94;103;123;124;139;195;246;361;363;420;464;473;485;547;594;802;880;1055;1056;1072;1077;1198;1199;1345;1348;1501;1504;1534;1641;1819;1954;1972;2009;2041;2299;2308;2315;2387;2388;2512;2537;2700;2806;2807	122;132;141;170;171;172;193;194;282;353;354;508;511;512;591;649;661;676;677;757;826;1109;1110;1203;1452;1453;1478;1479;1485;1657;1658;1855;1860;2064;2067;2104;2105;2239;2470;2658;2659;2681;2727;2728;2775;3118;3119;3120;3130;3142;3253;3254;3255;3426;3462;3463;3690;3691;3828;3829	189;204;205;220;221;261;262;263;264;296;297;298;299;424;535;536;537;762;766;767;768;882;974;997;998;1020;1021;1150;1240;1241;1657;1658;1799;2171;2172;2173;2211;2212;2213;2222;2483;2484;2786;2787;2793;2794;3092;3095;3096;3143;3144;3343;3344;3345;3346;3347;3348;3666;3968;3969;3970;3971;3972;3973;4003;4068;4069;4070;4071;4135;4622;4623;4624;4639;4653;4825;4826;4827;4828;4829;5095;5139;5140;5507;5508…	189;205;220;263;298;424;537;762;768;882;974;998;1020;1150;1241;1658;1799;2172;2212;2222;2483;2787;2794;3092;3096;3143;3345;3666;3973;4003;4069;4135;4622;4639;4653;4826;4829;5095;5139;5509;5731		338;339;340;341;342;343;344;345;346;347;348	19;20		13;81;200;328;492;594;598;744;871;888;963	974;977
sp|Q00055|GPD1_YEAST	sp|Q00055|GPD1_YEAST	2	2	2	sp|Q00055|GPD1_YEAST Glycerol-3-phosphate dehydrogenase [NAD(+)] 1 OS=Saccharomyces cerevisiae (strain ATCC 204508 / S288c) GN=GPD1 PE=1 SV=4	1	2	2	2	7.7	7.7	7.7	42.868	391	391	0	19.266	0.34175	0.64007	29.451	2	0	Median	75154000	57267000	17887000				371	2647;2909	True;True	2842;3124	3878;4277	5799;6370	5799;6370
sp|Q00955|ACAC_YEAST	sp|Q00955|ACAC_YEAST	2	2	2	sp|Q00955|ACAC_YEAST Acetyl-CoA carboxylase OS=Saccharomyces cerevisiae (strain ATCC 204508 / S288c) GN=ACC1 PE=1 SV=2	1	2	2	2	1.5	1.5	1.5	250.35	2233	2233	0	14.116	0.3325	0.61008	18.852	2	0	Median	32722000	25420000	7302000				372	1479;1818	True;True	1567;1953	2147;2657	3209;3967	3209;3967
sp|Q01560|NOP3_YEAST	sp|Q01560|NOP3_YEAST	17	17	17	sp|Q01560|NOP3_YEAST Nucleolar protein 3 OS=Saccharomyces cerevisiae (strain ATCC 204508 / S288c) GN=NPL3 PE=1 SV=1	1	17	17	17	41.1	41.1	41.1	45.407	414	414	0	177.42	0.79001	1.6293	13.233	31	4	Leave out requantified	27100000000	15200000000	11900000000				373	87;266;267;272;537;756;781;851;852;853;1086;1526;1735;1802;1910;1957;2151	True;True;True;True;True;True;True;True;True;True;True;True;True;True;True;True;True	93;284;285;290;574;801;826;897;898;899;1147;1617;1857;1932;2046;2047;2098;2305	130;131;405;406;407;413;414;415;800;801;1108;1136;1225;1226;1227;1228;1229;1230;1581;1582;2208;2209;2528;2624;2780;2781;2782;2845;2846;3126;3127	200;201;202;203;615;616;617;618;619;628;629;630;631;1203;1204;1205;1206;1655;1656;1689;1690;1691;1830;1831;1832;1833;1834;1835;1836;1837;1838;1839;1840;1841;2358;2359;2360;2361;2362;3296;3297;3298;3299;3300;3301;3755;3756;3757;3896;4140;4141;4142;4143;4144;4145;4146;4147;4238;4239;4240;4241;4630;4631;4632;4633;4634;4635	202;616;619;630;1204;1656;1690;1831;1835;1839;2361;3297;3755;3896;4145;4240;4634		349			151
sp|Q01662|MAP1_YEAST	sp|Q01662|MAP1_YEAST	1	1	1	sp|Q01662|MAP1_YEAST Methionine aminopeptidase 1 OS=Saccharomyces cerevisiae (strain ATCC 204508 / S288c) GN=MAP1 PE=1 SV=2	1	1	1	1	4.7	4.7	4.7	43.373	387	387	0	17.195	0.636	1.1222	NaN	1	0	Median	41534000	26650000	14884000				374	2311	TRUE	2480	3384	5030	5030
sp|Q01855|RS15_YEAST	sp|Q01855|RS15_YEAST	5	5	5	sp|Q01855|RS15_YEAST 40S ribosomal protein S15 OS=Saccharomyces cerevisiae (strain ATCC 204508 / S288c) GN=RPS15 PE=1 SV=1	1	5	5	5	54.2	54.2	54.2	16.002	142	142	0	62.016	0.57107	1.1992	12.91	17	0	Leave out requantified	19100000000	11900000000	7250000000				375	50;1326;1477;1811;2273	True;True;True;True;True	52;1403;1564;1565;1942;1943;1944;2440	71;72;1931;1932;2143;2144;2145;2637;2638;2639;2640;2641;2642;2643;2644;3325;3326	110;111;112;2879;2880;2881;2882;2883;3200;3201;3202;3203;3204;3205;3206;3207;3913;3914;3915;3916;3917;3918;3919;3920;3921;3922;3923;3924;3925;3926;3927;3928;3929;3930;3931;3932;3933;3934;3935;3936;3937;3938;4943;4944;4945;4946;4947;4948	111;2879;3207;3924;4946		350;351;352;353			28;83;89;111
sp|Q01939|PRS8_YEAST	sp|Q01939|PRS8_YEAST	4	4	4	sp|Q01939|PRS8_YEAST 26S protease regulatory subunit 8 homolog OS=Saccharomyces cerevisiae (strain ATCC 204508 / S288c) GN=RPT6 PE=1 SV=4	1	4	4	4	14.6	14.6	14.6	45.271	405	405	0	30.688	0.42627	0.80852	3.8589	5	2	Leave out requantified	458000000	280000000	179000000				376	452;1365;1496;2613	True;True;True;True	482;1443;1584;2804	672;1986;2165;2166;3825	1012;2965;2966;3235;3236;5725	1012;2965;3235;5725
sp|Q02202|ECM9_YEAST	sp|Q02202|ECM9_YEAST	1	1	1	sp|Q02202|ECM9_YEAST Protein ECM9 OS=Saccharomyces cerevisiae (strain ATCC 204508 / S288c) GN=ECM9 PE=1 SV=2	1	1	1	1	5	5	5	44.583	377	377	1	-2	NaN	NaN	NaN	0	0	Median	0	0	0	#ERROR!			377	1608	TRUE	1703	2318	3458	3458			34			27
sp|Q02326|RL6A_YEAST	sp|Q02326|RL6A_YEAST	10	5	5	sp|Q02326|RL6A_YEAST 60S ribosomal protein L6-A OS=Saccharomyces cerevisiae (strain ATCC 204508 / S288c) GN=RPL6A PE=1 SV=2	1	10	5	5	53.4	26.1	26.1	19.961	176	176	0	41.404	0.43671	0.86126	17.088	7	2	Leave out requantified	4350000000	1310000000	3040000000				378	184;396;688;925;1758;2049;2726;2846;2847;2963	False;True;False;True;True;False;False;True;True;False	199;422;729;978;1883;2198;2930;3059;3060;3182	287;593;1009;1010;1347;1348;2558;2983;3996;4178;4179;4180;4351;4352	429;430;431;432;884;1507;1508;1509;2039;2040;2041;3807;4426;4427;5973;5974;6229;6230;6231;6232;6478;6479;6480;6481	429;884;1509;2041;3807;4426;5973;6229;6232;6480		354			173
sp|Q02486|ABF2_YEAST	sp|Q02486|ABF2_YEAST	2	2	2	sp|Q02486|ABF2_YEAST ARS-binding factor 2, mitochondrial OS=Saccharomyces cerevisiae (strain ATCC 204508 / S288c) GN=ABF2 PE=1 SV=1	1	2	2	2	12	12	12	21.561	183	183	0	16.04	0.58048	1.0943	7.1299	3	1	Median	233000000	134000000	98595000				379	536;2281	True;True	573;2448	798;799;3338	1201;1202;4969	1202;4969
sp|Q02753|RL21A_YEAST	sp|Q02753|RL21A_YEAST	8	8	1	sp|Q02753|RL21A_YEAST 60S ribosomal protein L21-A OS=Saccharomyces cerevisiae (strain ATCC 204508 / S288c) GN=RPL21A PE=1 SV=1	1	8	8	1	51.2	51.2	6.9	18.242	160	160	0	66.112	0.4452	0.98065	20.44	13	1	Leave out requantified	12600000000	7680000000	4920000000				380	161;249;901;1176;2079;2309;2428;2640	True;True;True;True;True;True;True;True	176;266;952;1248;2228;2478;2603;2835	253;254;379;380;1307;1308;1724;3021;3380;3381;3551;3552;3869;3870	382;383;384;575;576;577;1972;1973;1974;1975;2587;2588;4478;4479;4480;4481;4482;4483;4484;4485;4486;4487;4488;4489;5022;5023;5024;5025;5265;5266;5267;5268;5787;5788;5789	384;575;1975;2587;4482;5024;5265;5789
sp|Q02796|LGE1_YEAST	sp|Q02796|LGE1_YEAST	3	3	3	sp|Q02796|LGE1_YEAST Transcriptional regulatory protein LGE1 OS=Saccharomyces cerevisiae (strain ATCC 204508 / S288c) GN=LGE1 PE=1 SV=1	1	3	3	3	9.6	9.6	9.6	37.309	332	332	0	18.677	0.99771	1.7016	22.859	4	1	Leave out requantified	9655800	4753300	4902400				381	778;2489;2534	True;True;True	823;2671;2720	1133;3649;3715;3716	1686;5440;5544;5545;5546	1686;5440;5544
sp|Q02863|UBP16_YEAST	sp|Q02863|UBP16_YEAST	1	1	1	sp|Q02863|UBP16_YEAST Ubiquitin carboxyl-terminal hydrolase 16 OS=Saccharomyces cerevisiae (strain ATCC 204508 / S288c) GN=UBP16 PE=1 SV=1	1	1	1	1	2.2	2.2	2.2	56.919	499	499	0.007538	5.9852	0.46493	0.85963	NaN	1	0	Median	4561300	3097600	1463800				382	1164	TRUE	1235	1708	2560	2560
sp|Q02892|NOG1_YEAST	sp|Q02892|NOG1_YEAST	4	4	4	sp|Q02892|NOG1_YEAST Nucleolar GTP-binding protein 1 OS=Saccharomyces cerevisiae (strain ATCC 204508 / S288c) GN=NOG1 PE=1 SV=1	1	4	4	4	8	8	8	74.409	647	647	0	26.39	0.40084	0.7332	44.523	4	0	Leave out requantified	138000000	88615000	48979000				383	295;771;2474;2952	True;True;True;True	313;816;2653;3171	443;444;1125;3621;4336	672;673;674;675;1676;5399;6455	674;1676;5399;6455
sp|Q02895|AAD16_YEAST	sp|Q02895|AAD16_YEAST	6	6	6	sp|Q02895|AAD16_YEAST Putative aryl-alcohol dehydrogenase AAD16 OS=Saccharomyces cerevisiae (strain ATCC 204508 / S288c) GN=AAD16 PE=1 SV=1	1	6	6	6	19.9	19.9	19.9	39.682	342	342	0	43.475	0.61063	1.2121	11.283	7	2	Leave out requantified	559000000	337000000	223000000				384	433;510;585;1428;2223;2400	True;True;True;True;True;True	462;541;622;1510;2382;2571	647;751;864;2075;3247;3248;3508	972;1142;1294;3108;4818;4819;5201	972;1142;1294;3108;4818;5201		355			89
sp|Q02948|BECN1_YEAST	sp|Q02948|BECN1_YEAST	1	1	1	sp|Q02948|BECN1_YEAST Vacuolar protein sorting-associated protein 30 OS=Saccharomyces cerevisiae (strain ATCC 204508 / S288c) GN=VPS30 PE=1 SV=1	1	1	1	1	1.3	1.3	1.3	63.26	557	557	0.007463	5.9052	0.33711	0.65346	11.055	2	0	Median	303000000	222000000	81242000				385	1475	TRUE	1562	2140;2141	3197;3198	3197
sp|Q02979|GDE1_YEAST	sp|Q02979|GDE1_YEAST	9	9	9	sp|Q02979|GDE1_YEAST Glycerophosphodiester phosphodiesterase GDE1 OS=Saccharomyces cerevisiae (strain ATCC 204508 / S288c) GN=GDE1 PE=1 SV=1	1	9	9	9	10.8	10.8	10.8	138.01	1223	1223	0	64.67	0.57171	1.0554	8.6568	8	3	Leave out requantified	637000000	323000000	314000000				386	526;1090;1696;2016;2188;2322;2332;2353;2805	True;True;True;True;True;True;True;True;True	560;1151;1811;2163;2345;2491;2502;2524;3013	778;1587;2459;2934;3191;3399;3411;3445;4108	1174;2370;3649;4363;4364;4738;4739;5060;5075;5119;6127	1174;2370;3649;4363;4738;5060;5075;5119;6127
sp|Q03102|YMN1_YEAST	sp|Q03102|YMN1_YEAST	11	11	11	sp|Q03102|YMN1_YEAST Uncharacterized membrane protein YML131W OS=Saccharomyces cerevisiae (strain ATCC 204508 / S288c) GN=YML131W PE=1 SV=1	1	11	11	11	32.9	32.9	32.9	39.976	365	365	0	81.229	0.63751	1.3812	11.853	12	3	Leave out requantified	2900000000	1710000000	1190000000				387	52;278;525;726;802;873;878;1888;2104;2105;2662	True;True;True;True;True;True;True;True;True;True;True	54;296;559;769;847;921;926;2024;2255;2256;2857	76;423;777;1058;1164;1263;1270;2749;2750;3059;3060;3897	118;119;642;1173;1590;1738;1897;1898;1910;4096;4097;4098;4099;4536;4537;4538;5827;5828	118;642;1173;1590;1738;1898;1910;4099;4536;4538;5827		356			67
sp|Q03195|RLI1_YEAST	sp|Q03195|RLI1_YEAST	1	1	1	sp|Q03195|RLI1_YEAST Translation initiation factor RLI1 OS=Saccharomyces cerevisiae (strain ATCC 204508 / S288c) GN=RLI1 PE=1 SV=1	1	1	1	1	2.5	2.5	2.5	68.34	608	608	0	14.568	0.37865	0.71516	NaN	1	0	Median	53086000	36818000	16269000				388	960	TRUE	1014	1396	2099	2099
sp|Q03497|STE20_YEAST	sp|Q03497|STE20_YEAST	7	7	7	sp|Q03497|STE20_YEAST Serine/threonine-protein kinase STE20 OS=Saccharomyces cerevisiae (strain ATCC 204508 / S288c) GN=STE20 PE=1 SV=1	1	7	7	7	11.9	11.9	11.9	102.36	939	939	0	60.315	0.66452	1.2685	19.945	8	3	Leave out requantified	490000000	286000000	204000000				389	148;175;187;355;550;578;2527	True;True;True;True;True;True;True	162;190;202;379;587;615;2713	236;275;290;532;814;852;3706;3707	359;413;436;795;1223;1279;1280;5532;5533	359;413;436;795;1223;1280;5532		357;358			383;387
sp|Q03529|SCS7_YEAST	sp|Q03529|SCS7_YEAST	2	2	2	sp|Q03529|SCS7_YEAST Ceramide very long chain fatty acid hydroxylase SCS7 OS=Saccharomyces cerevisiae (strain ATCC 204508 / S288c) GN=SCS7 PE=1 SV=1	1	2	2	2	8.6	8.6	8.6	44.881	384	384	0	17.462	0.18016	0.33214	63.434	2	1	Median	137000000	111000000	25969000				390	674;836	True;True	713;882	989;1206	1478;1804;1805	1478;1804
sp|Q03558|OYE2_YEAST;sp|P41816|OYE3_YEAST	sp|Q03558|OYE2_YEAST	25;2	25;2	25;2	sp|Q03558|OYE2_YEAST NADPH dehydrogenase 2 OS=Saccharomyces cerevisiae (strain ATCC 204508 / S288c) GN=OYE2 PE=1 SV=3	2	25	25	25	73.5	73.5	73.5	45.01	400	400;400	0	305.21	0.65426	1.2807	18.663	41	2	Leave out requantified	16600000000	9610000000	6980000000				391	72;143;144;164;167;208;273;366;427;614;626;650;651;706;809;1023;1208;1336;1698;1848;2384;2464;2783;2866;2867	True;True;True;True;True;True;True;True;True;True;True;True;True;True;True;True;True;True;True;True;True;True;True;True;True	77;157;158;179;182;223;291;390;455;652;664;689;690;748;854;1080;1280;1413;1813;1814;1983;2555;2643;2989;3079;3080;3081	108;109;228;229;230;260;265;318;319;416;417;418;547;638;639;905;906;923;924;958;959;960;1034;1035;1172;1489;1766;1767;1945;1946;1947;2461;2462;2694;3487;3488;3605;3606;4077;4078;4209;4210;4211	167;168;169;346;347;348;349;393;394;400;401;482;483;484;485;486;632;633;634;635;636;637;818;819;959;960;961;1352;1353;1378;1379;1429;1430;1431;1432;1433;1551;1552;1553;1554;1748;2229;2230;2645;2646;2647;2648;2900;2901;2902;2903;2904;2905;3651;3652;3653;4021;5170;5171;5172;5173;5372;5373;5374;5375;6086;6087;6278;6279;6280;6281;6282	169;346;349;394;401;483;637;818;959;1353;1378;1429;1432;1554;1748;2229;2648;2904;3652;4021;5172;5374;6086;6278;6279		359;360			144;378
sp|Q03818|ATG16_YEAST	sp|Q03818|ATG16_YEAST	1	1	1	sp|Q03818|ATG16_YEAST Autophagy protein 16 OS=Saccharomyces cerevisiae (strain ATCC 204508 / S288c) GN=ATG16 PE=1 SV=1	1	1	1	1	5.3	5.3	5.3	17.222	150	150	0.007576	5.9907	0.36538	0.64427	NaN	1	0	Median	42154000	31011000	11143000				392	821	TRUE	867	1189	1778	1778
sp|Q03897|WDR59_YEAST	sp|Q03897|WDR59_YEAST	1	1	1	sp|Q03897|WDR59_YEAST Maintenance of telomere capping protein 5 OS=Saccharomyces cerevisiae (strain ATCC 204508 / S288c) GN=MTC5 PE=1 SV=1	1	1	1	1	0.6	0.6	0.6	130.94	1148	1148	0.003096	10.706	0.54602	1.0028	NaN	1	0	Median	21004000	14567000	6436500				393	2666	TRUE	2861	3901	5834	5834
sp|Q03921|DOP1_YEAST	sp|Q03921|DOP1_YEAST	2	2	2	sp|Q03921|DOP1_YEAST Protein dopey OS=Saccharomyces cerevisiae (strain ATCC 204508 / S288c) GN=DOP1 PE=1 SV=1	1	2	2	2	1.5	1.5	1.5	194.69	1698	1698	0	11.258	0.49664	0.96279	87.061	2	0	Median	1390000000	778000000	610000000				394	282;2441	True;True	300;2618	427;3571	646;647;648;5319	646;5319
sp|Q03940|RUVB1_YEAST	sp|Q03940|RUVB1_YEAST	1	1	1	sp|Q03940|RUVB1_YEAST RuvB-like protein 1 OS=Saccharomyces cerevisiae (strain ATCC 204508 / S288c) GN=RVB1 PE=1 SV=1	1	1	1	1	2.4	2.4	2.4	50.452	463	463	0.002857	7.1386	0.61492	1.1019	NaN	1	1	Median	38663000	25815000	12848000				395	1369	TRUE	1447	1990	2970	2970
sp|Q04013|YHM2_YEAST	sp|Q04013|YHM2_YEAST	3	3	3	sp|Q04013|YHM2_YEAST Citrate/oxoglutarate carrier protein OS=Saccharomyces cerevisiae (strain ATCC 204508 / S288c) GN=YHM2 PE=1 SV=1	1	3	3	3	16.2	16.2	16.2	34.184	314	314	0	61.582	0.35827	0.70535	19.345	3	2	Median	499000000	366000000	133000000				396	1017;1929;2101	True;True;True	1074;2069;2252	1481;2807;3055	2215;4179;4180;4530	2215;4180;4530
sp|Q04067|EIF3G_YEAST	sp|Q04067|EIF3G_YEAST	1	1	1	sp|Q04067|EIF3G_YEAST Eukaryotic translation initiation factor 3 subunit G OS=Saccharomyces cerevisiae (strain ATCC 204508 / S288c) GN=TIF35 PE=1 SV=1	1	1	1	1	9.5	9.5	9.5	30.501	274	274	0.005236	6.2991	0.37018	0.67358	NaN	1	1	Median	31902000	24108000	7794100				397	2440	TRUE	2617	3570	5318	5318
sp|Q04264|PDS5_YEAST	sp|Q04264|PDS5_YEAST	43	43	43	sp|Q04264|PDS5_YEAST Sister chromatid cohesion protein PDS5 OS=Saccharomyces cerevisiae (strain ATCC 204508 / S288c) GN=PDS5 PE=1 SV=1	1	43	43	43	41.7	41.7	41.7	147.04	1277	1277	0	323.31	0.71557	1.3669	11.047	44	4	Leave out requantified	5690000000	3190000000	2490000000				398	36;53;84;101;121;185;250;304;438;464;600;670;686;730;962;1071;1089;1137;1145;1439;1457;1458;1470;1506;1523;1558;1622;1623;1637;1655;1900;2180;2467;2523;2562;2625;2679;2730;2744;2925;2927;2941;2974	True;True;True;True;True;True;True;True;True;True;True;True;True;True;True;True;True;True;True;True;True;True;True;True;True;True;True;True;True;True;True;True;True;True;True;True;True;True;True;True;True;True;True	37;55;90;107;131;200;267;322;468;494;637;709;727;773;1016;1130;1150;1205;1214;1523;1543;1544;1557;1595;1612;1652;1719;1720;1735;1753;2036;2337;2646;2708;2751;2820;2878;2934;2948;3143;3145;3160;3196	49;50;77;127;145;181;288;381;454;655;689;885;983;1005;1006;1062;1399;1558;1586;1664;1679;2091;2115;2116;2135;2180;2199;2253;2340;2341;2358;2383;2768;2769;3178;3609;3701;3755;3756;3849;3922;4002;4024;4298;4300;4301;4319;4320;4377	73;74;75;76;120;196;197;225;226;277;433;434;578;687;987;988;1041;1323;1324;1468;1469;1499;1500;1501;1502;1594;2102;2325;2368;2369;2493;2494;2516;2517;3126;3158;3159;3160;3191;3257;3258;3282;3365;3366;3490;3491;3513;3550;3551;4125;4126;4715;5378;5379;5527;5618;5619;5759;5865;5982;6015;6016;6398;6399;6401;6402;6403;6404;6430;6431;6432;6514	75;120;196;226;277;434;578;687;987;1041;1323;1468;1501;1594;2102;2325;2368;2493;2516;3126;3158;3160;3191;3257;3282;3366;3490;3491;3513;3550;4126;4715;5379;5527;5619;5759;5865;5982;6015;6398;6402;6430;6514		361;362	21;35		380;625	1162;1167
sp|Q04372|TAP42_YEAST	sp|Q04372|TAP42_YEAST	5	5	5	sp|Q04372|TAP42_YEAST Type 2A phosphatase-associated protein 42 OS=Saccharomyces cerevisiae (strain ATCC 204508 / S288c) GN=TAP42 PE=1 SV=1	1	5	5	5	14.2	14.2	14.2	42.567	366	366	0	38.228	0.80796	1.4967	13.899	5	0	Leave out requantified	203000000	101000000	102000000				399	188;1474;1756;1858;2080	True;True;True;True;True	203;1561;1881;1994;2229	291;2139;2556;2708;3022	437;438;3195;3196;3804;4043;4490;4491	437;3196;3804;4043;4490
sp|Q04377|LCD1_YEAST	sp|Q04377|LCD1_YEAST	2	2	2	sp|Q04377|LCD1_YEAST DNA damage checkpoint protein LCD1 OS=Saccharomyces cerevisiae (strain ATCC 204508 / S288c) GN=LCD1 PE=1 SV=1	1	2	2	2	2.7	2.7	2.7	86.424	747	747	0	12.124	0.97785	1.7674	18.7	2	0	Median	69252000	32230000	37023000				400	935;2202	True;True	988;2361	1361;3216	2057;4775;4776	2057;4775
sp|Q04651|ERV41_YEAST	sp|Q04651|ERV41_YEAST	3	3	3	sp|Q04651|ERV41_YEAST ER-derived vesicles protein ERV41 OS=Saccharomyces cerevisiae (strain ATCC 204508 / S288c) GN=ERV41 PE=1 SV=1	1	3	3	3	9.7	9.7	9.7	40.705	352	352	0	23.34	0.12037	0.23843	12.771	3	3	Median	139000000	131000000	8192700				401	1209;1408;2753	True;True;True	1281;1488;2957	1768;2049;4035	2649;3073;6029	2649;3073;6029
sp|Q04697|GSF2_YEAST	sp|Q04697|GSF2_YEAST	3	3	3	sp|Q04697|GSF2_YEAST Glucose-signaling factor 2 OS=Saccharomyces cerevisiae (strain ATCC 204508 / S288c) GN=GSF2 PE=1 SV=1	1	3	3	3	6.5	6.5	6.5	45.869	403	403	0	16.49	0.26491	0.4799	131.78	3	2	Median	175000000	115000000	60555000				402	459;1078;1489	True;True;True	489;1137;1577	682;1569;2157	1028;2344;3224	1028;2344;3224
sp|Q04781|LTN1_YEAST	sp|Q04781|LTN1_YEAST	11	11	11	sp|Q04781|LTN1_YEAST E3 ubiquitin-protein ligase listerin OS=Saccharomyces cerevisiae (strain ATCC 204508 / S288c) GN=RKR1 PE=1 SV=1	1	11	11	11	8.8	8.8	8.8	180.18	1562	1562	0	105.46	0.72094	1.3268	14.365	11	1	Leave out requantified	301000000	175000000	126000000				403	618;720;1491;1505;1795;1844;2033;2215;2470;2664;2771	True;True;True;True;True;True;True;True;True;True;True	656;763;1579;1594;1923;1979;2180;2374;2649;2859;2976	912;1051;2159;2179;2612;2690;2959;3237;3615;3899;4059	1364;1582;3226;3227;3255;3256;3880;4014;4015;4396;4804;4805;5385;5831;5832;6061	1364;1582;3226;3255;3880;4015;4396;4805;5385;5832;6061
sp|Q04947|RTN1_YEAST	sp|Q04947|RTN1_YEAST	4	4	4	sp|Q04947|RTN1_YEAST Reticulon-like protein 1 OS=Saccharomyces cerevisiae (strain ATCC 204508 / S288c) GN=RTN1 PE=1 SV=1	1	4	4	4	16.3	16.3	16.3	32.916	295	295	0	30.555	0.49757	0.92881	22.587	4	1	Leave out requantified	229000000	156000000	73344000				404	1321;1396;1424;2369	True;True;True;True	1398;1475;1505;2540	1924;2030;2068;3467	2870;3032;3097;5146	2870;3032;3097;5146
sp|Q05635|RNH2B_YEAST	sp|Q05635|RNH2B_YEAST	1	1	1	sp|Q05635|RNH2B_YEAST Ribonuclease H2 subunit B OS=Saccharomyces cerevisiae (strain ATCC 204508 / S288c) GN=RNH202 PE=1 SV=1	1	1	1	1	4	4	4	39.483	350	350	0.007353	5.843	0.85336	1.5296	33.247	2	0	Median	6327500	3314900	3012700				405	2815	TRUE	3025;3026	4124;4125	6151;6152	6151		363			245
sp|Q05672|RBS1_YEAST	sp|Q05672|RBS1_YEAST	1	1	1	sp|Q05672|RBS1_YEAST RNA-binding suppressor of PAS kinase protein 1 OS=Saccharomyces cerevisiae (strain ATCC 204508 / S288c) GN=RBS1 PE=1 SV=1	1	1	1	1	2.6	2.6	2.6	51.956	457	457	0.002967	8.2953	0.57088	1.0555	NaN	1	0	Median	10438000	6776500	3661300				406	2498	TRUE	2680	3661	5457	5457
sp|Q06063|DUS4_YEAST	sp|Q06063|DUS4_YEAST	1	1	1	sp|Q06063|DUS4_YEAST tRNA-dihydrouridine(20a/20b) synthase [NAD(P)+] OS=Saccharomyces cerevisiae (strain ATCC 204508 / S288c) GN=DUS4 PE=1 SV=1	1	1	1	1	7.4	7.4	7.4	41.696	367	367	0.003049	10.189	0.59767	1.1079	NaN	1	0	Median	9046400	5655200	3391100				407	1135	TRUE	1203	1662	2489;2490	2490
sp|Q06142|IMB1_YEAST	sp|Q06142|IMB1_YEAST	2	2	2	sp|Q06142|IMB1_YEAST Importin subunit beta-1 OS=Saccharomyces cerevisiae (strain ATCC 204508 / S288c) GN=KAP95 PE=1 SV=1	1	2	2	2	3.1	3.1	3.1	94.775	861	861	0	13.198	0.5768	0.9968	14.575	3	0	Median	7570600	4443000	3127600				408	364;1325	True;True	388;1402	544;1929;1930	814;2877;2878	814;2878
sp|Q06214|JIP5_YEAST	sp|Q06214|JIP5_YEAST	1	1	1	sp|Q06214|JIP5_YEAST WD repeat-containing protein JIP5 OS=Saccharomyces cerevisiae (strain ATCC 204508 / S288c) GN=JIP5 PE=1 SV=2	1	1	1	1	3.7	3.7	3.7	55.263	492	492	0.002674	6.5695	0.42653	0.66352	NaN	1	0	Median	708990	519300	189700				409	2391	TRUE	2562	3499	5188	5188
sp|Q06417|TDA5_YEAST	sp|Q06417|TDA5_YEAST	1	1	1	sp|Q06417|TDA5_YEAST Uncharacterized oxidoreductase TDA5 OS=Saccharomyces cerevisiae (strain ATCC 204508 / S288c) GN=TDA5 PE=1 SV=1	1	1	1	1	3.4	3.4	3.4	36.677	326	326	1	-2	NaN	NaN	NaN	0	0	Median	0	0	0	#ERROR!			410	1759	TRUE	1884	2559	3808	3808			22;36			76;79
sp|Q06508|LOA1_YEAST	sp|Q06508|LOA1_YEAST	1	1	1	sp|Q06508|LOA1_YEAST Lysophosphatidic acid:oleoyl-CoA acyltransferase 1 OS=Saccharomyces cerevisiae (strain ATCC 204508 / S288c) GN=LOA1 PE=1 SV=1	1	1	1	1	5	5	5	33.816	300	300	0	12.561	0.44322	0.78401	NaN	1	1	Median	41051000	27367000	13684000				411	1107	TRUE	1172	1621	2424	2424
sp|Q06630|MHR1_YEAST	sp|Q06630|MHR1_YEAST	5	5	5	sp|Q06630|MHR1_YEAST Mitochondrial homologous recombination protein 1 OS=Saccharomyces cerevisiae (strain ATCC 204508 / S288c) GN=MHR1 PE=1 SV=1	1	5	5	5	24.3	24.3	24.3	26.894	226	226	0	44.064	0.63038	1.1901	3.9274	5	2	Leave out requantified	689000000	382000000	307000000				412	245;700;1055;1385;2030	True;True;True;True;True	262;742;1113;1464;2177	374;1027;1535;2015;2955;2956	568;1542;1543;2301;3011;4390;4391;4392	568;1543;2301;3011;4392		364			74
sp|Q06668|OMS1_YEAST	sp|Q06668|OMS1_YEAST	3	3	3	sp|Q06668|OMS1_YEAST Methyltransferase OMS1, mitochondrial OS=Saccharomyces cerevisiae (strain ATCC 204508 / S288c) GN=OMS1 PE=1 SV=1	1	3	3	3	4.7	4.7	4.7	55.588	471	471	0	17.01	0.42284	0.76113	4.3147	2	0	Median	71665000	47998000	23666000				413	127;269;2911	True;True;True	137;287;3127	190;410;4280	291;625;6374	291;625;6374
sp|Q06697|CDC73_YEAST	sp|Q06697|CDC73_YEAST	16	16	16	sp|Q06697|CDC73_YEAST Cell division control protein 73 OS=Saccharomyces cerevisiae (strain ATCC 204508 / S288c) GN=CDC73 PE=1 SV=1	1	16	16	16	48.3	48.3	48.3	44.456	393	393	0	176.74	0.65568	1.2545	13.535	24	0	Leave out requantified	5920000000	3520000000	2400000000				414	345;655;738;761;1061;1097;1219;1666;1803;1814;1915;1966;1999;2328;2385;2450	True;True;True;True;True;True;True;True;True;True;True;True;True;True;True;True	369;694;781;806;1120;1158;1291;1770;1933;1948;2052;2110;2145;2497;2556;2629	520;965;1075;1114;1115;1546;1547;1598;1599;1783;1784;1785;2403;2404;2625;2651;2787;2861;2906;3406;3489;3490;3586;3587	780;1441;1442;1613;1614;1664;1665;1666;2312;2313;2387;2388;2389;2679;2680;2681;2682;2683;3580;3581;3897;3958;3959;4152;4153;4261;4262;4324;4325;5068;5174;5175;5176;5177;5342;5343;5344	780;1441;1613;1666;2313;2389;2683;3580;3897;3959;4152;4261;4324;5068;5175;5344		365;366;367			75;168;301
sp|Q07457|BRE1_YEAST	sp|Q07457|BRE1_YEAST	10	10	10	sp|Q07457|BRE1_YEAST E3 ubiquitin-protein ligase BRE1 OS=Saccharomyces cerevisiae (strain ATCC 204508 / S288c) GN=BRE1 PE=1 SV=1	1	10	10	10	16.1	16.1	16.1	80.691	700	700	0	63.69	0.79202	1.4749	24.381	10	2	Leave out requantified	513000000	279000000	233000000				415	523;847;1130;1551;1989;2018;2086;2214;2359;2397	True;True;True;True;True;True;True;True;True;True	556;893;1197;1645;2135;2165;2235;2373;2530;2568	771;1221;1656;2246;2893;2938;3031;3236;3452;3505	1167;1824;2482;3357;4305;4306;4370;4502;4803;5126;5197	1167;1824;2482;3357;4306;4370;4502;4803;5126;5197
sp|Q07478|SUB2_YEAST	sp|Q07478|SUB2_YEAST	2	2	2	sp|Q07478|SUB2_YEAST ATP-dependent RNA helicase SUB2 OS=Saccharomyces cerevisiae (strain ATCC 204508 / S288c) GN=SUB2 PE=1 SV=1	1	2	2	2	5.6	5.6	5.6	50.308	446	446	0	15.276	0.44513	0.82258	10.315	3	0	Median	81619000	53463000	28156000				416	275;671	True;True	293;710	420;984;985	639;1470;1471;1472;1473	639;1471
sp|Q07528|ATG20_YEAST	sp|Q07528|ATG20_YEAST	33	33	33	sp|Q07528|ATG20_YEAST Autophagy-related protein 20 OS=Saccharomyces cerevisiae (strain ATCC 204508 / S288c) GN=ATG20 PE=1 SV=1	1	33	33	33	58.8	58.8	58.8	72.545	640	640	0	323.31	0.76616	1.5956	11.806	65	10	Leave out requantified	22700000000	12600000000	10100000000				417	41;228;325;467;554;588;755;1032;1035;1041;1374;1375;1376;1398;1399;1503;1659;1686;1828;2004;2095;2130;2158;2175;2189;2200;2515;2620;2673;2910;2933;2934;2942	True;True;True;True;True;True;True;True;True;True;True;True;True;True;True;True;True;True;True;True;True;True;True;True;True;True;True;True;True;True;True;True;True	42;244;346;347;497;591;625;800;1089;1090;1093;1099;1452;1453;1454;1477;1478;1479;1592;1757;1758;1798;1799;1963;2151;2244;2245;2283;2314;2332;2346;2359;2699;2812;2870;3125;3126;3152;3153;3161	55;56;351;488;489;693;694;819;820;867;868;1105;1106;1107;1501;1502;1503;1506;1507;1515;1516;1996;1997;1998;1999;2000;2032;2033;2034;2035;2036;2037;2176;2177;2388;2389;2441;2442;2443;2669;2917;2918;3043;3044;3045;3098;3099;3140;3141;3169;3170;3171;3192;3214;3688;3689;3835;3836;3911;4278;4279;4308;4309;4310;4321;4322;4323	82;83;84;85;86;531;532;734;735;1048;1049;1050;1051;1230;1231;1232;1233;1297;1298;1299;1650;1651;1652;1653;1654;2248;2249;2250;2251;2252;2253;2256;2257;2258;2259;2271;2272;2982;2983;2984;2985;2986;2987;2988;2989;2990;3035;3036;3037;3038;3039;3040;3041;3042;3043;3044;3045;3046;3047;3048;3049;3050;3051;3052;3053;3054;3055;3056;3251;3252;3559;3560;3561;3562;3630;3631;3632;3986;4340;4341;4342;4516;451…	86;531;735;1051;1230;1299;1654;2250;2257;2271;2983;2986;2989;3038;3041;3251;3562;3632;3986;4342;4516;4600;4652;4703;4741;4773;5506;5739;5851;6372;6415;6417;6435		368;369;370;371;372;373;374;375			80;98;209;270;335;459;479;512
sp|Q07551|KAR_YEAST	sp|Q07551|KAR_YEAST	1	1	1	sp|Q07551|KAR_YEAST NADPH-dependent alpha-keto amide reductase OS=Saccharomyces cerevisiae (strain ATCC 204508 / S288c) GN=YDL124W PE=1 SV=1	1	1	1	1	6.7	6.7	6.7	35.56	312	312	0.007444	5.9047	0.6546	1.1337	NaN	1	0	Median	1966800	1192900	773860				418	1737	TRUE	1859	2531	3762;3763	3763
sp|Q07844|RIX7_YEAST	sp|Q07844|RIX7_YEAST	2	2	2	sp|Q07844|RIX7_YEAST Ribosome biogenesis ATPase RIX7 OS=Saccharomyces cerevisiae (strain ATCC 204508 / S288c) GN=RIX7 PE=1 SV=1	1	2	2	2	4.4	4.4	4.4	93.068	837	837	0	12.639	0.42202	0.72552	57.608	2	1	Median	3722900	2622400	1100500				419	1863;2216	True;True	1999;2375	2715;3238	4054;4806	4054;4806
sp|Q07896|NOC3_YEAST	sp|Q07896|NOC3_YEAST	1	1	1	sp|Q07896|NOC3_YEAST Nucleolar complex-associated protein 3 OS=Saccharomyces cerevisiae (strain ATCC 204508 / S288c) GN=NOC3 PE=1 SV=1	1	1	1	1	1.8	1.8	1.8	75.581	663	663	0.002755	6.8189	0.31599	0.58477	NaN	1	0	Median	9939600	6922700	3016900				420	2463	TRUE	2642	3604	5371	5371
sp|Q08208|NOP12_YEAST	sp|Q08208|NOP12_YEAST	2	2	2	sp|Q08208|NOP12_YEAST Nucleolar protein 12 OS=Saccharomyces cerevisiae (strain ATCC 204508 / S288c) GN=NOP12 PE=1 SV=1	1	2	2	2	6.3	6.3	6.3	51.941	459	459	0	14.554	0.45306	0.83177	5.2613	2	0	Median	30567000	21293000	9274400				421	2288;2545	True;True	2456;2732	3348;3734	4981;5581	4981;5581
sp|Q08683|APC5_YEAST	sp|Q08683|APC5_YEAST	1	1	1	sp|Q08683|APC5_YEAST Anaphase-promoting complex subunit 5 OS=Saccharomyces cerevisiae (strain ATCC 204508 / S288c) GN=APC5 PE=1 SV=1	1	1	1	1	2.6	2.6	2.6	79.274	685	685	0.007634	5.9996	0.90963	1.6505	NaN	1	0	Median	3138500	1559200	1579300				422	2306	TRUE	2475	3377	5018	5018
sp|Q08723|RPN8_YEAST	sp|Q08723|RPN8_YEAST	3	3	3	sp|Q08723|RPN8_YEAST 26S proteasome regulatory subunit RPN8 OS=Saccharomyces cerevisiae (strain ATCC 204508 / S288c) GN=RPN8 PE=1 SV=3	1	3	3	3	12.1	12.1	12.1	38.312	338	338	0	27.641	0.48252	0.88536	25.047	4	0	Leave out requantified	83093000	50087000	33005000				423	329;2780;2954	True;True;True	351;2985;3173	494;4071;4072;4338	742;6077;6078;6079;6457	742;6077;6457
sp|Q08745|RS10A_YEAST	sp|Q08745|RS10A_YEAST	6	1	1	sp|Q08745|RS10A_YEAST 40S ribosomal protein S10-A OS=Saccharomyces cerevisiae (strain ATCC 204508 / S288c) GN=RPS10A PE=1 SV=1	1	6	1	1	59	7.6	7.6	12.739	105	105	0.002899	7.3766	NaN	NaN	NaN	0	0	Median	0	0	0				424	130;610;892;1037;1217;1830	False;False;False;False;False;True	140;648;941;1095;1289;1965	195;196;899;900;1290;1291;1509;1510;1781;2671;2672;2673	300;301;302;303;304;1345;1346;1347;1946;1947;1948;1949;2261;2262;2263;2670;2671;2672;2673;2674;2675;2676;2677;3989;3990;3991	301;1347;1949;2263;2671;3991
sp|Q08972|NEW1_YEAST	sp|Q08972|NEW1_YEAST	2	2	2	sp|Q08972|NEW1_YEAST [NU+] prion formation protein 1 OS=Saccharomyces cerevisiae (strain ATCC 204508 / S288c) GN=NEW1 PE=1 SV=1	1	2	2	2	2.4	2.4	2.4	134.33	1196	1196	0	12.564	0.38859	0.68124	36.288	2	2	Median	12339000	8913600	3425900				425	1740;1824	True;True	1862;1959	2534;2664	3766;3980	3766;3980
sp|Q12010|YPQ1_YEAST	sp|Q12010|YPQ1_YEAST	2	2	2	sp|Q12010|YPQ1_YEAST Probable vacuolar amino acid transporter YPQ1 OS=Saccharomyces cerevisiae (strain ATCC 204508 / S288c) GN=YPQ1 PE=1 SV=1	1	2	2	2	9.4	9.4	9.4	34.872	308	308	0	15.151	0.39258	0.71889	5.0267	2	0	Median	47911000	30186000	17726000				426	986;1125	True;True	1042;1191	1434;1649	2146;2474	2146;2474		376			142
sp|Q12019|MDN1_YEAST	sp|Q12019|MDN1_YEAST	2	2	2	sp|Q12019|MDN1_YEAST Midasin OS=Saccharomyces cerevisiae (strain ATCC 204508 / S288c) GN=MDN1 PE=1 SV=1	1	2	2	2	0.6	0.6	0.6	559.3	4910	4910	0	13.247	0.54589	0.98838	6.9822	2	0	Median	8374800	5675300	2699500				427	117;297	True;True	127;315	176;446	269;270;677	270;677
sp|Q12136|SAS10_YEAST	sp|Q12136|SAS10_YEAST	1	1	1	sp|Q12136|SAS10_YEAST Something about silencing protein 10 OS=Saccharomyces cerevisiae (strain ATCC 204508 / S288c) GN=SAS10 PE=1 SV=1	1	1	1	1	1.1	1.1	1.1	70.259	610	610	0.007692	6.0621	0.51182	0.97631	NaN	1	0	Median	221000000	154000000	66431000				428	1727	TRUE	1848	2516	3738	3738
sp|Q12159|YRA1_YEAST	sp|Q12159|YRA1_YEAST	3	3	3	sp|Q12159|YRA1_YEAST RNA annealing protein YRA1 OS=Saccharomyces cerevisiae (strain ATCC 204508 / S288c) GN=YRA1 PE=1 SV=2	1	3	3	3	14.6	14.6	14.6	24.955	226	226	0	21.197	0.37473	0.71542	13.488	3	1	Median	339000000	227000000	112000000				429	682;1521;2218	True;True;True	723;1610;2377	1001;2197;3240	1495;3279;4808	1495;3279;4808
sp|Q12165|ATPD_YEAST;sp|P26637|SYLC_YEAST	sp|Q12165|ATPD_YEAST;sp|P26637|SYLC_YEAST	2;1	2;1	2;1	sp|Q12165|ATPD_YEAST ATP synthase subunit delta, mitochondrial OS=Saccharomyces cerevisiae (strain ATCC 204508 / S288c) GN=ATP16 PE=1 SV=1;sp|P26637|SYLC_YEAST Leucine--tRNA ligase, cytoplasmic OS=Saccharomyces cerevisiae (strain ATCC 204508 / S288c) GN=CD	2	2	2	2	21.9	21.9	21.9	17.02	160	160;1090	0	12.043	0.56165	1.0261	11.327	2	0	Median	43700000	28437000	15262000				430	1029;1798	True;True	1086;1926	1497;2617	2241;2242;3887	2241;3887
sp|Q12250|RPN5_YEAST	sp|Q12250|RPN5_YEAST	2	2	2	sp|Q12250|RPN5_YEAST 26S proteasome regulatory subunit RPN5 OS=Saccharomyces cerevisiae (strain ATCC 204508 / S288c) GN=RPN5 PE=1 SV=3	1	2	2	2	5.4	5.4	5.4	51.768	445	445	0	11.048	0.74094	1.3666	5.5992	2	1	Median	71615000	45167000	26448000				431	1405;1789	True;True	1485;1917	2046;2605	3069;3873	3069;3873		377			309
sp|Q12251|YP011_YEAST	sp|Q12251|YP011_YEAST	1	1	1	sp|Q12251|YP011_YEAST Uncharacterized mitochondrial carrier YPR011C OS=Saccharomyces cerevisiae (strain ATCC 204508 / S288c) GN=YPR011C PE=1 SV=1	1	1	1	1	5.5	5.5	5.5	35.913	326	326	0.002994	8.7562	0.37003	0.64739	NaN	1	1	Median	2162200	1728500	433680				432	43	TRUE	44	58	88	88
sp|Q12324|YVC1_YEAST	sp|Q12324|YVC1_YEAST	1	1	1	sp|Q12324|YVC1_YEAST Calcium channel YVC1 OS=Saccharomyces cerevisiae (strain ATCC 204508 / S288c) GN=YVC1 PE=1 SV=2	1	1	1	1	2.2	2.2	2.2	77.952	675	675	0.009709	5.7273	0.2762	0.51174	NaN	1	0	Median	9314100	7373500	1940600				433	1298	TRUE	1375	1896	2836	2836
sp|Q12338|RNH2C_YEAST	sp|Q12338|RNH2C_YEAST	5	5	5	sp|Q12338|RNH2C_YEAST Ribonuclease H2 subunit C OS=Saccharomyces cerevisiae (strain ATCC 204508 / S288c) GN=RNH203 PE=1 SV=1	1	5	5	5	62.7	62.7	62.7	12.482	110	110	0	41.123	0.6985	1.3085	30.065	4	0	Leave out requantified	875000000	626000000	249000000				434	448;642;1177;1552;2106	True;True;True;True;True	478;681;1249;1646;2257	667;950;1725;2247;3061	1005;1006;1417;1418;2589;2590;3358;3359;4539	1005;1417;2590;3359;4539
sp|Q12377|RPN6_YEAST	sp|Q12377|RPN6_YEAST	2	2	2	sp|Q12377|RPN6_YEAST 26S proteasome regulatory subunit RPN6 OS=Saccharomyces cerevisiae (strain ATCC 204508 / S288c) GN=RPN6 PE=1 SV=3	1	2	2	2	4.8	4.8	4.8	49.773	434	434	0	15.065	0.73667	1.3308	NaN	1	0	Median	33157000	20294000	12862000				435	336;2225	True;True	360;2384	507;3250	760;761;4821	760;4821
sp|Q12460|NOP56_YEAST	sp|Q12460|NOP56_YEAST	8	8	8	sp|Q12460|NOP56_YEAST Nucleolar protein 56 OS=Saccharomyces cerevisiae (strain ATCC 204508 / S288c) GN=NOP56 PE=1 SV=1	1	8	8	8	21.8	21.8	21.8	56.863	504	504	0	53.429	0.44485	0.8764	86.095	7	5	Median	527000000	293000000	235000000				436	94;181;302;810;992;1447;1670;2579	True;True;True;True;True;True;True;True	100;196;320;855;1048;1533;1775;2769	138;283;452;1173;1441;2103;2409;3778	212;425;685;1749;2156;3141;3142;3587;5650	212;425;685;1749;2156;3142;3587;5650		378			296
sp|Q12480|ETFA_YEAST	sp|Q12480|ETFA_YEAST	2	2	2	sp|Q12480|ETFA_YEAST Probable electron transfer flavoprotein subunit alpha, mitochondrial OS=Saccharomyces cerevisiae (strain ATCC 204508 / S288c) GN=AIM45 PE=1 SV=1	1	2	2	2	11.6	11.6	11.6	36.802	344	344	0	11.138	0.43917	0.80443	NaN	1	0	Median	17964000	13551000	4413000				437	1501;2792	True;True	1590;3000	2174;4091	3249;6102	3249;6102
sp|Q12499|NOP58_YEAST	sp|Q12499|NOP58_YEAST	4	4	4	sp|Q12499|NOP58_YEAST Nucleolar protein 58 OS=Saccharomyces cerevisiae (strain ATCC 204508 / S288c) GN=NOP58 PE=1 SV=1	1	4	4	4	10.8	10.8	10.8	56.956	511	511	0	36.66	0.44762	0.81601	12.721	5	0	Leave out requantified	147000000	105000000	42381000				438	83;684;1438;1593	True;True;True;True	89;725;1522;1687	125;126;1003;2090;2296	193;194;195;1497;3125;3425;3426	195;1497;3125;3426
sp|Q12522|IF6_YEAST	sp|Q12522|IF6_YEAST	1	1	1	sp|Q12522|IF6_YEAST Eukaryotic translation initiation factor 6 OS=Saccharomyces cerevisiae (strain ATCC 204508 / S288c) GN=TIF6 PE=1 SV=1	1	1	1	1	6.9	6.9	6.9	26.457	245	245	0.00303	9.2313	0.36185	0.67958	NaN	1	0	Median	107000000	77500000	29430000				439	808	TRUE	853	1171	1747	1747
sp|Q12672|RL21B_YEAST	sp|Q12672|RL21B_YEAST	8	1	1	sp|Q12672|RL21B_YEAST 60S ribosomal protein L21-B OS=Saccharomyces cerevisiae (strain ATCC 204508 / S288c) GN=RPL21B PE=1 SV=1	1	8	1	1	51.2	6.9	6.9	18.274	160	160	0.002625	6.3334	0.41105	0.90501	NaN	1	0	Median	445000000	309000000	136000000				440	161;249;902;1176;2079;2309;2428;2640	False;False;True;False;False;False;False;False	176;266;953;1248;2228;2478;2603;2835	253;254;379;380;1309;1724;3021;3380;3381;3551;3552;3869;3870	382;383;384;575;576;577;1976;2587;2588;4478;4479;4480;4481;4482;4483;4484;4485;4486;4487;4488;4489;5022;5023;5024;5025;5265;5266;5267;5268;5787;5788;5789	384;575;1976;2587;4482;5024;5265;5789

## Sheet: phosphopeptides
Proteins	Positions within proteins	Leading proteins	Protein	Fasta headers	Localization prob	Score diff	PEP	Score	Delta score	Score for localization	Diagnostic peak	Number of Phospho (ST)	Amino acid	Sequence window	Modification window	Peptide window coverage	Phospho (ST) Probabilities	Phospho (ST) Score diffs	Position in peptide	Charge	Mass error [ppm]	Ratio H/L	Ratio H/L___1	Ratio H/L___2	Ratio H/L___3	Ratio H/L normalized	Ratio H/L normalized___1	Ratio H/L normalized___2	Ratio H/L normalized___3	Ratio H/L unmod. pep.	Ratio H/L localized	Ratio H/L nmods	Ratio H/L variability [%]	Ratio H/L count	Ratio H/L iso-count	Ratio H/L type	Occupancy L	Occupancy H	Intensity	Intensity L	Intensity H	Ratio mod/base L	Ratio mod/base H	Reverse	Potential contaminant	id	Protein group IDs	Positions	Position
sp|A0A0B7P3V8|YP41B_YEAST;sp|P0C2J7|YH41B_YEAST;sp|P47024|YJ41B_YEAST	532;532;533	sp|A0A0B7P3V8|YP41B_YEAST	sp|A0A0B7P3V8|YP41B_YEAST	sp|A0A0B7P3V8|YP41B_YEAST Transposon Ty4-P Gag-Pol polyprotein OS=Saccharomyces cerevisiae (strain ATCC 204508 / S288c) GN=TY4B-P PE=5 SV=2;sp|P0C2J7|YH41B_YEAST Transposon Ty4-H Gag-Pol polyprotein OS=Saccharomyces cerevisiae (strain ATCC 204508 / S288c)	1	68.7846	0.013691	89.247	22.813	89.247		1	S	NGVIHVKMNELIERPSDDSKINAIKPTSSPG	X;X;X;X;X;X;X;Oxidation (M);X;X;X;X;X;X;X;Phospho (ST);X;X;X;X;X;X;X;X;X;X;X;X;X;X;X	XXXXXXXPPPPPPPPPPPPPXXXXXXXXXXX	MNELIERPS(1)DDSK	MNELIERPS(68.78)DDS(-68.78)K	9	2	-1.6743	0.098517	0.098517	NaN	NaN	0.195	0.195	NaN	NaN	NaN	#ERROR!	1	NaN	1	1	Median	NaN	NaN	66224000	61561000	4662700	NaN	NaN			0	14	532	532
sp|P07264|LEUC_YEAST	488	sp|P07264|LEUC_YEAST	sp|P07264|LEUC_YEAST	sp|P07264|LEUC_YEAST 3-isopropylmalate dehydratase OS=Saccharomyces cerevisiae (strain ATCC 204508 / S288c) GN=LEU1 PE=1 SV=3	0.996127	24.1032	6.56e-21	336.06	319.38	336.06		1	S	FVDIREFEYKDQDQSSPKVEVTSEDEKELES	X;X;X;X;X;X;X;X;X;X;X;X;X;X;X;Phospho (ST);X;X;X;X;X;Phospho (ST);Phospho (ST);X;X;X;X;X;X;X;X	XXXXXPPPPPPPPPPPPPXXXXXXXXXXXXX	EFEYKDQDQS(0.004)S(0.996)PK	EFEYKDQDQS(-24.1)S(24.1)PK	11	2	-0.07811	0.6422	0.6422	NaN	NaN	1.2335	1.2335	NaN	NaN	1.6138	#ERROR!	1	NaN	1	0	Median	0	0	91454000	54964000	36490000	0.061911	0.0584			1	78	488	488
sp|P07264|LEUC_YEAST	495	sp|P07264|LEUC_YEAST	sp|P07264|LEUC_YEAST	sp|P07264|LEUC_YEAST 3-isopropylmalate dehydratase OS=Saccharomyces cerevisiae (strain ATCC 204508 / S288c) GN=LEU1 PE=1 SV=3	0.999973	45.692	5.22e-08	222.34	208.23	222.34		1	S	EYKDQDQSSPKVEVTSEDEKELESAAYDHAE	X;X;X;X;X;X;X;X;Phospho (ST);X;X;X;X;X;X;Phospho (ST);X;X;X;X;X;X;X;X;X;X;X;X;X;X;X	XXXXXXXXXXXPPPPPPPPPXXXXXXXXXXX	VEVTS(1)EDEK	VEVT(-45.69)S(45.69)EDEK	5	1	0.19381	0.82141	0.82141	NaN	NaN	1.523	1.523	NaN	NaN	1.5644	#ERROR!	1	5.5023	2	0	Median	0	0	169000000	92227000	77065000	0.035917	0.039317			2	78	495	495
sp|P32657|CHD1_YEAST	619	sp|P32657|CHD1_YEAST	sp|P32657|CHD1_YEAST	sp|P32657|CHD1_YEAST Chromo domain-containing protein 1 OS=Saccharomyces cerevisiae (strain ATCC 204508 / S288c) GN=CHD1 PE=1 SV=1	0.999948	42.8372	0.034742	50.207	50.207	50.207		2	S	KSLPSKTERILRVELSDVQTEYYKNILTKNY	X;X;X;X;X;X;Phospho (ST);X;X;X;X;X;X;X;X;Phospho (ST);X;X;X;X;X;X;X;GlyGly (K);X;X;X;X;X;X;X	XXXXXXPPPPPPPPPPPPPPPPPPXXXXXXX	T(1)ERILRVELS(1)DVQTEYYK	T(42.48)ERILRVELS(42.84)DVQT(-42.48)EYYK	10	2	0.2511																		1490000000	1490000000	0	NaN	NaN			3	220	619	619
sp|P32905|RSSA1_YEAST;sp|P46654|RSSA2_YEAST	2;2	sp|P32905|RSSA1_YEAST;sp|P46654|RSSA2_YEAST	sp|P46654|RSSA2_YEAST	sp|P32905|RSSA1_YEAST 40S ribosomal protein S0-A OS=Saccharomyces cerevisiae (strain ATCC 204508 / S288c) GN=RPS0A PE=1 SV=3;sp|P46654|RSSA2_YEAST 40S ribosomal protein S0-B OS=Saccharomyces cerevisiae (strain ATCC 204508 / S288c) GN=RPS0B PE=1 SV=2	0.35502	0.417424	0.021055	48.337	48.337	48.337			S	______________MSLPATFDLTPEDAQLL	X;X;X;X;X;X;X;X;X;X;X;X;X;X;X;Phospho (ST);X;X;X;X;X;X;X;X;X;X;X;X;X;X;X	XXXXXXXXXXXXXXXPPPPPPPPPPPPPPPP	S(0.355)LPAT(0.322)FDLT(0.322)PEDAQLLLAANTHLGAR	S(0.42)LPAT(-0.42)FDLT(-0.42)PEDAQLLLAANT(-45.56)HLGAR	1	3	-2.024																		0	0	0	0	0			4	222;330	2;2	2
sp|P34233|ASH1_YEAST	388	sp|P34233|ASH1_YEAST	sp|P34233|ASH1_YEAST	sp|P34233|ASH1_YEAST Transcriptional regulatory protein ASH1 OS=Saccharomyces cerevisiae (strain ATCC 204508 / S288c) GN=ASH1 PE=1 SV=1	0.999975	46.4853	0.040076	71.379	28.256	71.379		1	S	RDILSNNSKSNVRKPSKNKISKQASNVFGNT	X;X;X;X;X;X;X;X;X;X;X;X;X;X;X;Phospho (ST);GlyGly (K);X;GlyGly (K);X;X;X;X;X;X;X;X;X;X;X;X	XXXXXXXXXXXXXPPPPPPPPPXXXXXXXXX	KPS(1)KNKISK	KPS(46.49)KNKIS(-46.49)K	3	2	-1.7951	0.003257	0.003257	NaN	NaN	0.007635	0.007635	NaN	NaN	NaN	#ERROR!	1	NaN	1	1	Median	NaN	NaN	1510000000	1500000000	14198000	NaN	NaN			5	232	388	388
sp|P36046|MIA40_YEAST	245	sp|P36046|MIA40_YEAST	sp|P36046|MIA40_YEAST	sp|P36046|MIA40_YEAST Mitochondrial intermembrane space import and assembly protein 40 OS=Saccharomyces cerevisiae (strain ATCC 204508 / S288c) GN=MIA40 PE=1 SV=2	0.625991	0	0.038296	52.403	25.607	52.403		2	S	TEDNNGEEESSKKTVSDSENSAKQSESSDEE	X;X;X;X;X;X;X;X;X;X;X;X;X;Phospho (ST);X;Phospho (ST);X;X;X;X;X;X;X;X;X;X;X;X;X;X;X	XXXXXXXXXXXXXPPPPPPPPPPXXXXXXXX	T(0.747)VS(0.626)DS(0.626)ENS(0.001)AK	T(1.7)VS(0)DS(0)ENS(-29.39)AK	3	1	0.42598																		60220000	60220000	0	NaN	NaN			6	241	245	245
sp|P36046|MIA40_YEAST	247	sp|P36046|MIA40_YEAST	sp|P36046|MIA40_YEAST	sp|P36046|MIA40_YEAST Mitochondrial intermembrane space import and assembly protein 40 OS=Saccharomyces cerevisiae (strain ATCC 204508 / S288c) GN=MIA40 PE=1 SV=2	0.626105	0	0.038296	52.403	25.607	52.403		2	S	DNNGEEESSKKTVSDSENSAKQSESSDEEKE	X;X;X;X;X;X;X;X;X;X;X;X;X;X;X;X;X;X;X;X;X;X;X;X;X;X;X;X;X;X;X	XXXXXXXXXXXXXXXXXXXXXXXXXXXXXXX	T(0.747)VS(0.626)DS(0.626)ENS(0.001)AK	T(1.7)VS(0)DS(0)ENS(-29.39)AK	5	1	0.42598																		60220000	60220000	0	NaN	NaN			7	241	247	247
sp|P36072|YKL8_YEAST	24	sp|P36072|YKL8_YEAST	sp|P36072|YKL8_YEAST	sp|P36072|YKL8_YEAST Putative uncharacterized protein YKL118W OS=Saccharomyces cerevisiae (strain ATCC 204508 / S288c) GN=YKL118W PE=5 SV=1	0.333333	0	0.042758	74.53	49.093	74.53			S	DFALFLNFRRNSVILSFSLISNIRVLLCDAN	X;X;X;X;X;X;X;X;X;X;X;X;X;X;X;Phospho (ST);X;X;X;X;X;X;X;X;X;X;X;X;X;X;X	XXXXXXXXXXPPPPPPPPPPPPPPXXXXXXX	NSVILS(0.333)FS(0.333)LIS(0.333)NIR	NS(-63.5)VILS(0)FS(0)LIS(0)NIR	6	2	0.63701																		0	0	0	NaN	NaN			8	242	24	24
sp|P36072|YKL8_YEAST	26	sp|P36072|YKL8_YEAST	sp|P36072|YKL8_YEAST	sp|P36072|YKL8_YEAST Putative uncharacterized protein YKL118W OS=Saccharomyces cerevisiae (strain ATCC 204508 / S288c) GN=YKL118W PE=5 SV=1	0.333333	0	0.042758	74.53	49.093	74.53			S	ALFLNFRRNSVILSFSLISNIRVLLCDANRQ	X;X;X;X;X;X;X;X;X;X;X;X;X;X;X;X;X;X;X;X;X;X;X;X;X;X;X;X;X;X;X	XXXXXXXXXXXXXXXXXXXXXXXXXXXXXXX	NSVILS(0.333)FS(0.333)LIS(0.333)NIR	NS(-63.5)VILS(0)FS(0)LIS(0)NIR	8	2	0.63701																		0	0	0	NaN	NaN			9	242	26	26
sp|P36072|YKL8_YEAST	29	sp|P36072|YKL8_YEAST	sp|P36072|YKL8_YEAST	sp|P36072|YKL8_YEAST Putative uncharacterized protein YKL118W OS=Saccharomyces cerevisiae (strain ATCC 204508 / S288c) GN=YKL118W PE=5 SV=1	0.333333	0	0.042758	74.53	49.093	74.53			S	LNFRRNSVILSFSLISNIRVLLCDANRQLSY	X;X;X;X;X;X;X;X;X;X;X;X;X;X;X;X;X;X;X;X;X;X;X;X;X;X;X;X;X;X;X	XXXXXXXXXXXXXXXXXXXXXXXXXXXXXXX	NSVILS(0.333)FS(0.333)LIS(0.333)NIR	NS(-63.5)VILS(0)FS(0)LIS(0)NIR	11	2	0.63701																		0	0	0	NaN	NaN			10	242	29	29
sp|P38351|PAF1_YEAST	147	sp|P38351|PAF1_YEAST	sp|P38351|PAF1_YEAST	sp|P38351|PAF1_YEAST RNA polymerase II-associated protein 1 OS=Saccharomyces cerevisiae (strain ATCC 204508 / S288c) GN=PAF1 PE=1 SV=1	1	81.1244	4.87e-06	132.26	120.52	85.925		1	S	DNTSLKRKRRLDDGDSDDENLDVNHIISRVE	X;X;X;X;X;X;X;X;X;X;X;X;X;X;X;Phospho (ST);X;X;X;X;X;X;X;X;X;X;X;X;X;X;X	XXXXXXXXXPPPPPPPPPPPPPPPPPPPPXX	RLDDGDS(1)DDENLDVNHIISR	RLDDGDS(81.12)DDENLDVNHIIS(-81.12)R	7	3	-0.10097	0.74712	0.74712	NaN	NaN	1.4287	1.4287	NaN	NaN	NaN	#ERROR!	1	6.7479	2	0	Median	NaN	NaN	277000000	172000000	105000000	NaN	NaN			11	259	147	147
sp|P38439|LEO1_YEAST	132	sp|P38439|LEO1_YEAST	sp|P38439|LEO1_YEAST	sp|P38439|LEO1_YEAST RNA polymerase-associated protein LEO1 OS=Saccharomyces cerevisiae (strain ATCC 204508 / S288c) GN=LEO1 PE=1 SV=1	0.99984	38.6731	2.27e-16	249.04	242.2	249.04		1	S	AMYTRKFYGEDANNFSDQDETTHTFKEENVE	X;X;X;X;X;X;X;X;X;X;X;X;X;X;X;Phospho (ST);X;X;X;X;X;X;X;X;X;X;X;X;X;X;X	XXXXXXPPPPPPPPPPPPPPPPPPPPPPPPP	FYGEDANNFS(1)DQDETTHTFKEENVELVR	FYGEDANNFS(38.67)DQDET(-38.67)T(-46.28)HT(-61.35)FKEENVELVR	10	3	-0.26022	0.48894	0.48894	NaN	NaN	0.91718	0.91718	NaN	NaN	NaN	#ERROR!	1	NaN	1	0	Median	NaN	NaN	109000000	57768000	51316000	NaN	NaN			12	262	132	132
sp|P38439|LEO1_YEAST	372	sp|P38439|LEO1_YEAST	sp|P38439|LEO1_YEAST	sp|P38439|LEO1_YEAST RNA polymerase-associated protein LEO1 OS=Saccharomyces cerevisiae (strain ATCC 204508 / S288c) GN=LEO1 PE=1 SV=1	0.995386	26.7935	0.007095	75.89	61.014	75.89		1	S	ESPDAAFETGFRKQNSPTTYGASRRNEYEED	X;X;X;X;X;X;X;X;X;X;X;X;X;X;X;Phospho (ST);X;X;X;X;X;X;X;X;X;X;X;X;X;X;X	XXXXXXXXXXXXPPPPPPPPPPPPXXXXXXX	KQNS(0.995)PT(0.002)T(0.002)YGASR	KQNS(26.79)PT(-26.79)T(-26.79)YGAS(-33.46)R	4	2	-0.05641	0.84162	0.84162	NaN	NaN	1.5544	1.5544	NaN	NaN	NaN	#ERROR!	1	NaN	1	0	Median	NaN	NaN	11090000	6130500	4959900	NaN	NaN			13	262	372	372
sp|P38862|ATG7_YEAST	8	sp|P38862|ATG7_YEAST	sp|P38862|ATG7_YEAST	sp|P38862|ATG7_YEAST Ubiquitin-like modifier-activating enzyme ATG7 OS=Saccharomyces cerevisiae (strain ATCC 204508 / S288c) GN=ATG7 PE=1 SV=1	0.973539	18.6678	0.040514	49.06	49.06	49.06		1	S	________MSSERVLSYAPAFKSFLDTSFFQ	X;X;X;X;X;X;X;X;X;X;X;X;X;X;X;Phospho (ST);X;X;X;X;X;X;X;X;X;X;X;X;X;X;X	XXXXXXXXXPPPPPPPPPPPPPXXXXXXXXX	S(0.013)S(0.013)ERVLS(0.974)YAPAFK	S(-18.67)S(-18.67)ERVLS(18.67)YAPAFK	7	1	0.24214																		362000000	362000000	0	NaN	NaN			14	276	8	8
sp|P40433|6P21_YEAST	667	sp|P40433|6P21_YEAST	sp|P40433|6P21_YEAST	sp|P40433|6P21_YEAST 6-phosphofructo-2-kinase 1 OS=Saccharomyces cerevisiae (strain ATCC 204508 / S288c) GN=PFK26 PE=1 SV=1	0.509188	2.64121	4.61e-10	190.83	178.35	190.83		1	S	SARSSFASDFLSRKRSNPTSASSSQSELSEQ	X;X;X;X;X;X;X;X;X;X;X;X;X;X;X;Phospho (ST);X;X;X;X;X;X;X;X;X;X;X;X;X;X;X	XXXXXXXXXXXXXPPPPPPPPPPPPPPPPPP	KRS(0.509)NPT(0.277)S(0.214)ASSSQSELSEQPK	KRS(2.64)NPT(-2.64)S(-3.77)AS(-38.8)S(-64.61)S(-81.81)QS(-119.76)ELS(-164.6)EQPK	3	3	-0.55131	0.50449	0.50449	NaN	NaN	0.9871	0.9871	NaN	NaN	NaN		1	NaN	1	0	Median	NaN	NaN	60270000	28603000	31667000	NaN	NaN			15	307	667	667
sp|P40546|FAF1_YEAST	277	sp|P40546|FAF1_YEAST	sp|P40546|FAF1_YEAST	sp|P40546|FAF1_YEAST Protein FAF1 OS=Saccharomyces cerevisiae (strain ATCC 204508 / S288c) GN=FAF1 PE=1 SV=1	0.985223	18.2396	0.038717	71.949	18.24	71.949		1	S	IVLSKVKKGQFRKIESTYKKDIERRIGGSIK	X;X;X;X;X;X;X;X;X;X;X;X;GlyGly (K);X;X;Phospho (ST);X;X;X;X;X;X;X;X;X;X;X;X;X;X;X	XXXXXXXXXXXXPPPPPPPXXXXXXXXXXXX	KIES(0.985)T(0.015)YK	KIES(18.24)T(-18.24)YK	4	2	-0.49157	0.064288	0.064288	NaN	NaN	0.12041	0.12041	NaN	NaN	NaN	#ERROR!	1	NaN	1	1	Median	NaN	NaN	115000000	108000000	6895800	NaN	NaN			16	310	277	277
sp|P42837|FIG4_YEAST	752	sp|P42837|FIG4_YEAST	sp|P42837|FIG4_YEAST	sp|P42837|FIG4_YEAST Polyphosphoinositide phosphatase OS=Saccharomyces cerevisiae (strain ATCC 204508 / S288c) GN=FIG4 PE=1 SV=1	1	68.6087	0.019878	69.737	32.113	69.737		1	S	PKQELELYEHYLHIISDRSQKLEEKMNSFSY	X;GlyGly (K);X;X;X;X;X;X;X;X;X;X;X;X;X;Phospho (ST);X;X;X;X;X;X;X;X;X;X;X;X;X;X;X	PPPPPPPPPPPPPPPPPPXXXXXXXXXXXXX	DTSPKQELELYEHYLHIIS(1)DR	DT(-68.61)S(-68.61)PKQELELYEHYLHIIS(68.61)DR	19	3	-1.9462																		170000000	170000000	0	NaN	NaN			17	322	752	752
sp|P53115|INO80_YEAST	623	sp|P53115|INO80_YEAST	sp|P53115|INO80_YEAST	sp|P53115|INO80_YEAST Putative DNA helicase INO80 OS=Saccharomyces cerevisiae (strain ATCC 204508 / S288c) GN=INO80 PE=1 SV=1	1	83.1675	0.031304	83.168	18.434	83.168		1	S	NVSSNDSESQKNIDISALAPNKNDFHAIDFD	X;X;X;X;X;X;X;X;X;X;X;X;X;X;X;Phospho (ST);X;X;X;X;X;X;X;X;X;X;X;X;X;X;X	XXXXXXXXXXXPPPPPPPPPPPXXXXXXXXX	NIDIS(1)ALAPNK	NIDIS(83.17)ALAPNK	5	2	-0.71369																		25580000	25580000	0	NaN	NaN			18	351	623	623
sp|P89105|CTR9_YEAST	974	sp|P89105|CTR9_YEAST	sp|P89105|CTR9_YEAST	sp|P89105|CTR9_YEAST RNA polymerase-associated protein CTR9 OS=Saccharomyces cerevisiae (strain ATCC 204508 / S288c) GN=CTR9 PE=1 SV=3	0.999984	48.0233	3.39e-12	228.49	224.34	228.49		2	S	EREAMAISEHNVKDDSDLSDKDNEYDEEKPR	X;X;X;X;Oxidation (M);X;X;X;X;X;X;X;X;X;X;Phospho (ST);X;X;Phospho (ST);X;X;X;X;X;X;X;X;X;X;X;X	XXPPPPPPPPPPPPPPPPPPPPPPPPPPPPP	EAMAISEHNVKDDS(1)DLS(1)DKDNEYDEEKPR	EAMAIS(-48.02)EHNVKDDS(48.02)DLS(74.16)DKDNEYDEEKPR	14	4	0.29545	0.64757	NaN	0.64757	NaN	1.2301	NaN	1.2301	NaN	NaN	#ERROR!	2	NaN	1	1	Median	NaN	NaN	182000000	133000000	49811000	NaN	NaN			19	370	974	974
sp|P89105|CTR9_YEAST	977	sp|P89105|CTR9_YEAST	sp|P89105|CTR9_YEAST	sp|P89105|CTR9_YEAST RNA polymerase-associated protein CTR9 OS=Saccharomyces cerevisiae (strain ATCC 204508 / S288c) GN=CTR9 PE=1 SV=3	1	74.1643	3.39e-12	228.49	224.34	228.49		2	S	AMAISEHNVKDDSDLSDKDNEYDEEKPRQKR	X;Oxidation (M);X;X;X;X;X;X;X;X;X;X;Phospho (ST);X;X;Phospho (ST);X;X;X;X;X;X;X;X;X;X;X;X;X;X;X	PPPPPPPPPPPPPPPPPPPPPPPPPPPPXXX	EAMAISEHNVKDDS(1)DLS(1)DKDNEYDEEKPR	EAMAIS(-48.02)EHNVKDDS(48.02)DLS(74.16)DKDNEYDEEKPR	17	4	0.29545	0.64757	NaN	0.64757	NaN	1.2301	NaN	1.2301	NaN	NaN	#ERROR!	2	NaN	1	1	Median	NaN	NaN	182000000	133000000	49811000	NaN	NaN			20	370	977	977
sp|Q04264|PDS5_YEAST	1167	sp|Q04264|PDS5_YEAST	sp|Q04264|PDS5_YEAST	sp|Q04264|PDS5_YEAST Sister chromatid cohesion protein PDS5 OS=Saccharomyces cerevisiae (strain ATCC 204508 / S288c) GN=PDS5 PE=1 SV=1	0.99955	33.4639	0.027531	64.836	35.687	64.836		2	S	TVQEAQLSFKTYIPESLTEKIQNNIKAKIGR	X;X;X;X;X;X;X;X;X;X;Phospho (ST);X;X;X;X;Phospho (ST);X;X;X;X;X;X;X;X;X;X;X;X;X;X;X	XXXXXXXXXXPPPPPPPPPPXXXXXXXXXXX	T(0.999)YIPES(1)LT(0.001)EK	T(30.88)YIPES(33.46)LT(-30.88)EK	6	1	1.8966	37.943	NaN	37.943	NaN	69.261	NaN	69.261	NaN	NaN	#ERROR!	2	NaN	1	1	Median	NaN	NaN	19069000	175970	18893000	NaN	NaN			21	398	1167	1167
sp|Q06417|TDA5_YEAST	79	sp|Q06417|TDA5_YEAST	sp|Q06417|TDA5_YEAST	sp|Q06417|TDA5_YEAST Uncharacterized oxidoreductase TDA5 OS=Saccharomyces cerevisiae (strain ATCC 204508 / S288c) GN=TDA5 PE=1 SV=1	0.5	0	0.046087	54.776	25.695	54.776		1	S	SLREFKNGIVLITGGSKGLGRAIVSQLLQDY	X;X;X;X;X;X;X;X;X;X;X;X;X;X;X;X;X;X;X;X;X;X;X;X;X;X;X;X;X;X;X	XXXXXXXXXXXXXXXXXXXXXXXXXXXXXXX	NGIVLIT(0.5)GGS(0.5)K	NGIVLIT(0)GGS(0)K	10	2	1.6902	0.099417	0.099417	NaN	NaN	0.18145	0.18145	NaN	NaN	NaN		1	NaN	1	1	Median	NaN	NaN	31387000	28885000	2501200	NaN	NaN			22	410	79	79
sp|P04802|SYDC_YEAST	196	sp|P04802|SYDC_YEAST	sp|P04802|SYDC_YEAST	sp|P04802|SYDC_YEAST Aspartate--tRNA ligase, cytoplasmic OS=Saccharomyces cerevisiae (strain ATCC 204508 / S288c) GN=DPS1 PE=1 SV=3	0.994625	23.0699	0.045164	50.207	50.207	50.207		1	T	SATVQNLEIHITKIYTISETPEALPILLEDA	X;X;X;X;X;X;X;X;X;X;X;X;X;X;X;Phospho (ST);X;X;X;X;X;X;X;X;X;X;X;X;X;X;X	XXXXXXXXXXXXXPPPPPPPPPPPPPPPPPP	IYT(0.995)IS(0.005)ETPEALPILLEDASR	IYT(23.07)IS(-23.07)ET(-36.17)PEALPILLEDAS(-36.38)R	3	2	-0.00405																		936000000	936000000	0	NaN	NaN			23	41	196	196
sp|P07264|LEUC_YEAST	494	sp|P07264|LEUC_YEAST	sp|P07264|LEUC_YEAST	sp|P07264|LEUC_YEAST 3-isopropylmalate dehydratase OS=Saccharomyces cerevisiae (strain ATCC 204508 / S288c) GN=LEU1 PE=1 SV=3	0.473262	0.509982	2.53e-07	126.07	126.07	126.07			T	FEYKDQDQSSPKVEVTSEDEKELESAAYDHA	X;X;X;X;X;X;X;X;X;Phospho (ST);X;X;X;X;X;Phospho (ST);X;X;X;X;X;X;X;X;X;X;X;X;X;X;X	XXXXXXXXXXXXPPPPPPPPPPPPPPPPPPP	VEVT(0.473)S(0.421)EDEKELES(0.106)AAYDHAEPVQPEDAPQDIANDELK	VEVT(0.51)S(-0.51)EDEKELES(-6.5)AAYDHAEPVQPEDAPQDIANDELK	4	4	0.22294																		0	0	0	0	0			24	78	494	494
sp|P10363|PRI1_YEAST	95	sp|P10363|PRI1_YEAST	sp|P10363|PRI1_YEAST	sp|P10363|PRI1_YEAST DNA primase small subunit OS=Saccharomyces cerevisiae (strain ATCC 204508 / S288c) GN=PRI1 PE=1 SV=2	0.993849	22.0838	0.020722	90.709	17.044	90.709		1	T	FEIGAIYNKPPRERDTLLKSELKALEKELVF	X;X;X;X;X;X;X;X;X;X;X;X;X;X;X;Phospho (ST);X;X;X;X;X;X;X;X;X;X;X;X;X;X;X	XXXXXXXXXXXXXXPPPPPPPPPXXXXXXXX	DT(0.994)LLKS(0.006)ELK	DT(22.08)LLKS(-22.08)ELK	2	2	-1.3318	0.021113	0.021113	NaN	NaN	0.04007	0.04007	NaN	NaN	NaN	#ERROR!	1	NaN	1	1	Median	NaN	NaN	176000000	172000000	3483900	NaN	NaN			25	123	95	95
sp|P19414|ACON_YEAST;sp|P39533|ACON2_YEAST	694;699	sp|P19414|ACON_YEAST	sp|P19414|ACON_YEAST	sp|P19414|ACON_YEAST Aconitate hydratase, mitochondrial OS=Saccharomyces cerevisiae (strain ATCC 204508 / S288c) GN=ACO1 PE=1 SV=2;sp|P39533|ACON2_YEAST Homocitrate dehydratase, mitochondrial OS=Saccharomyces cerevisiae (strain ATCC 204508 / S288c) GN=ACO2	0.999001	29.9982	0.042177	70.056	27.718	70.056		1	T	GGFAIITKSFARIHETNLKKQGLLPLNFKNP	X;X;X;X;X;X;X;X;X;X;X;X;X;X;X;Phospho (ST);X;X;X;X;X;X;X;X;X;X;X;X;X;X;X	XXXXXXXXPPPPPPPPPPPPXXXXXXXXXXX	S(0.001)FARIHET(0.999)NLKK	S(-30)FARIHET(30)NLKK	8	2	0.51392	0.16059	0.16059	NaN	NaN	0.28914	0.28914	NaN	NaN	NaN	#ERROR!	1	NaN	1	1	Median	NaN	NaN	34314000	32156000	2158000	NaN	NaN			26	162	694	694
sp|P27801|PEP3_YEAST	747	sp|P27801|PEP3_YEAST	sp|P27801|PEP3_YEAST	sp|P27801|PEP3_YEAST Vacuolar membrane protein PEP3 OS=Saccharomyces cerevisiae (strain ATCC 204508 / S288c) GN=PEP3 PE=1 SV=1	0.923554	10.821	0.023548	68.371	9.2178	68.371		2	T	LLLSMKDIDIKQLIRTILNDSNEILTIKDLL	X;X;X;X;X;X;X;X;X;X;X;X;X;X;X;Phospho (ST);X;X;X;X;X;X;X;X;X;Phospho (ST);X;X;X;X;X	XXXXXXXXXXXXXXXPPPPPPPPPPPPPXXX	T(0.924)ILNDS(0.076)NEILT(1)IK	T(10.82)ILNDS(-10.82)NEILT(57.85)IK	1	2	-2.3717	0.33711	NaN	0.33711	NaN	0.60705	NaN	0.60705	NaN	NaN	#ERROR!	2	NaN	1	1	Median	NaN	NaN	34650000	30021000	4628700	NaN	NaN			27	191	747	747
sp|P27801|PEP3_YEAST	757	sp|P27801|PEP3_YEAST	sp|P27801|PEP3_YEAST	sp|P27801|PEP3_YEAST Vacuolar membrane protein PEP3 OS=Saccharomyces cerevisiae (strain ATCC 204508 / S288c) GN=PEP3 PE=1 SV=1	0.999998	57.8472	0.023548	68.371	9.2178	68.371		2	T	KQLIRTILNDSNEILTIKDLLPFFNEYTTIA	X;X;X;X;X;Phospho (ST);X;X;X;X;X;X;X;X;X;Phospho (ST);X;X;X;X;X;X;X;X;X;X;X;X;X;X;X	XXXXXPPPPPPPPPPPPPXXXXXXXXXXXXX	T(0.924)ILNDS(0.076)NEILT(1)IK	T(10.82)ILNDS(-10.82)NEILT(57.85)IK	11	2	-2.3717	0.33711	NaN	0.33711	NaN	0.60705	NaN	0.60705	NaN	NaN	#ERROR!	2	NaN	1	1	Median	NaN	NaN	34650000	30021000	4628700	NaN	NaN			28	191	757	757
sp|P32657|CHD1_YEAST	610	sp|P32657|CHD1_YEAST	sp|P32657|CHD1_YEAST	sp|P32657|CHD1_YEAST Chromo domain-containing protein 1 OS=Saccharomyces cerevisiae (strain ATCC 204508 / S288c) GN=CHD1 PE=1 SV=1	0.999944	42.483	0.034742	50.207	50.207	50.207		2	T	LRRLKKDVEKSLPSKTERILRVELSDVQTEY	X;X;X;X;X;X;X;X;X;X;X;X;X;X;X;Phospho (ST);X;X;X;X;X;X;X;X;Phospho (ST);X;X;X;X;X;X	XXXXXXXXXXXXXXXPPPPPPPPPPPPPPPP	T(1)ERILRVELS(1)DVQTEYYK	T(42.48)ERILRVELS(42.84)DVQT(-42.48)EYYK	1	2	0.2511																		1490000000	1490000000	0	NaN	NaN			29	220	610	610
sp|P36046|MIA40_YEAST	243	sp|P36046|MIA40_YEAST	sp|P36046|MIA40_YEAST	sp|P36046|MIA40_YEAST Mitochondrial intermembrane space import and assembly protein 40 OS=Saccharomyces cerevisiae (strain ATCC 204508 / S288c) GN=MIA40 PE=1 SV=2	0.746855	1.69939	0.038296	52.403	25.607	52.403		2	T	TTTEDNNGEEESSKKTVSDSENSAKQSESSD	X;X;X;X;X;X;X;X;X;X;X;X;X;X;X;Phospho (ST);X;Phospho (ST);X;X;X;X;X;X;X;X;X;X;X;X;X	XXXXXXXXXXXXXXXPPPPPPPPPPXXXXXX	T(0.747)VS(0.626)DS(0.626)ENS(0.001)AK	T(1.7)VS(0)DS(0)ENS(-29.39)AK	1	1	0.42598																		60220000	60220000	0	NaN	NaN			30	241	243	243
sp|P38703|LAG1_YEAST	18	sp|P38703|LAG1_YEAST	sp|P38703|LAG1_YEAST	sp|P38703|LAG1_YEAST Sphingosine N-acyltransferase LAG1 OS=Saccharomyces cerevisiae (strain ATCC 204508 / S288c) GN=LAG1 PE=1 SV=1	1	52.6831	0.037891	52.683	13.891	52.683		1	T	SATDKSIDRLVVNAKTRRRNSSVGKIDLGDT	X;X;X;X;X;X;X;X;X;X;X;X;X;X;GlyGly (K);Phospho (ST);X;X;X;X;X;X;X;X;X;X;X;X;X;X;X	XXXXXXXXXPPPPPPPPXXXXXXXXXXXXXX	LVVNAKT(1)R	LVVNAKT(52.68)R	7	2	2.7027																		0	0	0	NaN	NaN			31	269	18	18
sp|P43586|LOC1_YEAST	79	sp|P43586|LOC1_YEAST	sp|P43586|LOC1_YEAST	sp|P43586|LOC1_YEAST 60S ribosomal subunit assembly/export protein LOC1 OS=Saccharomyces cerevisiae (strain ATCC 204508 / S288c) GN=LOC1 PE=1 SV=1	1	57.2809	0.049386	57.281	35.909	57.281		1	T	KDKKGKYSEKDLNIPTLNRAIVPGVKIRRGK	X;X;X;X;X;X;X;X;X;X;X;X;X;X;X;Phospho (ST);X;X;X;X;X;X;X;X;X;X;X;X;X;X;X	XXXXXXXXXXPPPPPPPPPXXXXXXXXXXXX	DLNIPT(1)LNR	DLNIPT(57.28)LNR	6	1	-2.1915	0.3915	0.3915	NaN	NaN	0.76051	0.76051	NaN	NaN	NaN	#ERROR!	1	NaN	1	0	Median	NaN	NaN	57633000	41470000	16163000	NaN	NaN			32	327	79	79
sp|P43621|COPD_YEAST	277	sp|P43621|COPD_YEAST	sp|P43621|COPD_YEAST	sp|P43621|COPD_YEAST Coatomer subunit delta OS=Saccharomyces cerevisiae (strain ATCC 204508 / S288c) GN=RET2 PE=1 SV=3	0.492278	0.641166	0.000118	132.17	125.14	132.17			T	GAAPRPSAISSASSGTPPPPEEDVPENNGIL	X;X;X;X;X;X;X;X;X;X;X;X;X;X;X;Phospho (ST);X;X;X;X;X;X;X;X;X;X;X;X;X;X;X	XXXXXPPPPPPPPPPPPPPPPPPPPPPPPPP	PSAIS(0.002)S(0.013)AS(0.068)S(0.425)GT(0.492)PPPPEEDVPENNGILISIK	PS(-37.69)AIS(-23.46)S(-15.82)AS(-8.61)S(-0.64)GT(0.64)PPPPEEDVPENNGILIS(-115.77)IK	11	3	1.064																		0	0	0	0	NaN			33	329	277	277
sp|Q02202|ECM9_YEAST	27	sp|Q02202|ECM9_YEAST	sp|Q02202|ECM9_YEAST	sp|Q02202|ECM9_YEAST Protein ECM9 OS=Saccharomyces cerevisiae (strain ATCC 204508 / S288c) GN=ECM9 PE=1 SV=2	0.558942	1.04394	0.021859	76.522	39.195	76.522		1	T	FEKITAYLDYHDFRLTITANQPSITLPYYVD	X;X;X;X;X;X;X;X;X;X;X;X;X;X;X;Phospho (ST);X;X;X;X;X;X;X;X;X;X;X;X;X;X;X	XXXXXXXXXXXXXXPPPPPPPPPPPPPPPPP	LT(0.559)IT(0.44)ANQPS(0.001)ITLPYYVDEK	LT(1.04)IT(-1.04)ANQPS(-26.32)IT(-33.71)LPYYVDEK	2	2	-1.335																		146000000	0	146000000	NaN	NaN			34	377	27	27
sp|Q04264|PDS5_YEAST	1162	sp|Q04264|PDS5_YEAST	sp|Q04264|PDS5_YEAST	sp|Q04264|PDS5_YEAST Sister chromatid cohesion protein PDS5 OS=Saccharomyces cerevisiae (strain ATCC 204508 / S288c) GN=PDS5 PE=1 SV=1	0.999184	30.8756	0.027531	64.836	35.687	64.836		2	T	FKPFATVQEAQLSFKTYIPESLTEKIQNNIK	X;X;X;X;X;X;X;X;X;X;X;X;X;X;X;Phospho (ST);X;X;X;X;Phospho (ST);X;X;X;X;X;X;X;X;X;X	XXXXXXXXXXXXXXXPPPPPPPPPPXXXXXX	T(0.999)YIPES(1)LT(0.001)EK	T(30.88)YIPES(33.46)LT(-30.88)EK	1	1	1.8966	37.943	NaN	37.943	NaN	69.261	NaN	69.261	NaN	NaN	#ERROR!	2	NaN	1	1	Median	NaN	NaN	19069000	175970	18893000	NaN	NaN			35	398	1162	1162
sp|Q06417|TDA5_YEAST	76	sp|Q06417|TDA5_YEAST	sp|Q06417|TDA5_YEAST	sp|Q06417|TDA5_YEAST Uncharacterized oxidoreductase TDA5 OS=Saccharomyces cerevisiae (strain ATCC 204508 / S288c) GN=TDA5 PE=1 SV=1	0.5	0	0.046087	54.776	25.695	54.776		1	T	AWKSLREFKNGIVLITGGSKGLGRAIVSQLL	X;X;X;X;X;X;X;X;X;X;X;X;X;X;X;Phospho (ST);X;X;X;X;X;X;X;X;X;X;X;X;X;X;X	XXXXXXXXXPPPPPPPPPPPXXXXXXXXXXX	NGIVLIT(0.5)GGS(0.5)K	NGIVLIT(0)GGS(0)K	7	2	1.6902	0.099417	0.099417	NaN	NaN	0.18145	0.18145	NaN	NaN	NaN		1	NaN	1	1	Median	NaN	NaN	31387000	28885000	2501200	NaN	NaN			36	410	76	76
[truncated: 16 more columns]

## Sheet: digly_peptides
Proteins	Positions within proteins	Leading proteins	Protein	Fasta headers	Localization prob	Score diff	PEP	Score	Delta score	Score for localization	Diagnostic peak	Number of GlyGly (K)	Amino acid	Sequence window	Modification window	Peptide window coverage	GlyGly (K) Probabilities	GlyGly (K) Score diffs	Position in peptide	Charge	Mass error [ppm]	Ratio H/L	Ratio H/L___1	Ratio H/L___2	Ratio H/L___3	Ratio H/L normalized	Ratio H/L normalized___1	Ratio H/L normalized___2	Ratio H/L normalized___3	Ratio H/L unmod. pep.	Ratio H/L localized	Ratio H/L nmods	Ratio H/L variability [%]	Ratio H/L count	Ratio H/L iso-count	Ratio H/L type	Occupancy L	Occupancy H	Intensity	Intensity L	Intensity H	Ratio mod/base L	Ratio mod/base H	Reverse	Potential contaminant	id	Protein group IDs	Positions	Position
sp|P05759|RS27A_YEAST;sp|P0CH08|RL401_YEAST;sp|P0CH09|RL402_YEAST;sp|P0CG63|UBI4P_YEAST	48;48;48;48	sp|P05759|RS27A_YEAST;sp|P0CH08|RL401_YEAST	sp|P05759|RS27A_YEAST	sp|P05759|RS27A_YEAST Ubiquitin-40S ribosomal protein S31 OS=Saccharomyces cerevisiae (strain ATCC 204508 / S288c) GN=RPS31 PE=1 SV=3;sp|P0CH08|RL401_YEAST Ubiquitin-60S ribosomal protein L40 OS=Saccharomyces cerevisiae (strain ATCC 204508 / S288c) GN=RPL4	1	82.3618	0.004056	82.362	68.398	82.362		1	K	KEGIPPDQQRLIFAGKQLEDGRTLSDYNIQK	X;X;X;X;X;X;X;X;X;X;X;X;X;X;X;GlyGly (K);X;X;X;X;X;X;X;X;X;X;X;X;X;X;X	XXXXXXXXXXPPPPPPPPPPPPXXXXXXXXX	LIFAGK(1)QLEDGR	LIFAGK(82.36)QLEDGR	6	3	0.38171	0.42125	0.42125	NaN	NaN	0.79628	0.79628	NaN	NaN	NaN	#ERROR!	1	NaN	1	0	Median	NaN	NaN	153000000	102000000	51079000	NaN	NaN			0	63;101	48;48	48
sp|P25390|SSK22_YEAST	169	sp|P25390|SSK22_YEAST	sp|P25390|SSK22_YEAST	sp|P25390|SSK22_YEAST Serine/threonine-protein kinase SSK22 OS=Saccharomyces cerevisiae (strain ATCC 204508 / S288c) GN=SSK22 PE=1 SV=2	0.783972	5.5979	0.020049	68.312	45.86	68.312		1	K	KWQSMLARVLKGDIVKGEKTRIANQVKKPGL	X;X;X;X;X;X;X;X;X;X;X;X;X;X;X;GlyGly (K);X;X;X;X;X;X;X;X;X;X;X;X;X;X;X	XXXXXXXXXXXPPPPPPPPXXXXXXXXXXXX	GDIVK(0.784)GEK(0.216)	GDIVK(5.6)GEK(-5.6)	5	2	0.008762	0.55177	0.55177	NaN	NaN	1.0584	1.0584	NaN	NaN	NaN	#ERROR!	1	NaN	1	0	Median	NaN	NaN	55443000	33170000	22272000	NaN	NaN			1	177	169	169
sp|P42837|FIG4_YEAST	738	sp|P42837|FIG4_YEAST	sp|P42837|FIG4_YEAST	sp|P42837|FIG4_YEAST Polyphosphoinositide phosphatase OS=Saccharomyces cerevisiae (strain ATCC 204508 / S288c) GN=FIG4 PE=1 SV=1	1	69.7372	0.019878	69.737	32.113	69.737		1	K	GRVVETTDLDRDTSPKQELELYEHYLHIISD	X;X;X;X;X;X;X;X;X;X;X;X;X;X;X;GlyGly (K);X;X;X;X;X;X;X;X;X;X;X;X;X;Phospho (ST);X	XXXXXXXXXXXPPPPPPPPPPPPPPPPPPPP	DTSPK(1)QELELYEHYLHIISDR	DTSPK(69.74)QELELYEHYLHIISDR	5	3	-1.9462																		170000000	170000000	0	NaN	NaN			2	322	738	738
[truncated: 16 more columns]
