# Supplementary material for: Ubiquitination drives COPI priming and Golgi SNARE localization
Source: eLife journal article supplement (doi:10.7554/elife.80911), 2022-07-29
Supplement: data1 [file Figure 7 Source Data 2.xlsx]

## Sheet: Sheet1
	% Tube and Ring Structure
% punctae	% tube + ring	% punctae	% tube + ring	% punctae	% tube + ring
WT		β'COPΔ2-304		glo3Δ
100	0	0	100	100	0
100	0	67	33	66.6667	33.3333
83.3333	16.6667	0	100	80	20
100	0	25	75	100	0
100	0	25	75	80	20
80	20	67	33	50	50
100	0	80	20	75	25
100	0	25	75	100	0
100	0	25	75	100	0
100	0	40	60	100	0
100	0	66.6667	33.3333	80	20
75	25	0	100	100	0
100	0	66.6667	33.3333	100	0
66.6667	33.3333	0	100	100	0
100	0	0	100	100	0
100	0	50	50	100	0
100	0	66.6667	33.3333	80	20
100	0	50	50	100	0
100	0	83.3333	16.6667	100	0
100	0	20	80	66.6667	33.3333
100	0	100	0	80	20
100	0	25	75	100	0
100	0	80	20	71.4286	28.5714
100	0	50	50	100	0
100	0	40	60	100	0
100	0	100	0	90	10
100	0	25	75	80	20
100	0	25	75	100	0
100	0	50	50	80	20
100	0	80	20	90	10
100	0	25	75	90	10
100	0	0	100	100	0
100	0	66.6667	33.3333	100	0
100	0	0	100	100	0
100	0	0	100	50	50
100	0	50	50	100	0
100	0	40	60	100	0
100	0	25	75	100	0
100	0	80	20	100	0
100	0	50	50	100	0
100	0	100	0	80	20
100	0			100	0
100	0			100	0
100	0			90	10
100	0			60	40
				100	0
				71.4286	28.5714
				100	0
