# Supplementary material for: Ubiquitination drives COPI priming and Golgi SNARE localization
Source: eLife journal article supplement (doi:10.7554/elife.80911), 2022-07-29
Supplement: supp [file elife-80911-supp-v1.zip]

Archive with 17 entries (17 files):
- elife_poa_e80911_Transparent_Reporting_File.pdf
- elife_poa_e80911_Figure_1_figure_supplement_1.ai
- elife_poa_e80911_Figure_1_figure_supplement_2.ai
- elife_poa_e80911_Figure_2_figure_supplement_1.ai
- elife_poa_e80911_Figure_2_figure_supplement_2.ai
- elife_poa_e80911_Figure_2_figure_supplement_3.ai
- elife_poa_e80911_Figure_2_figure_supplement_4.ai
- elife_poa_e80911_Figure_3_figure_supplement_1.ai
- elife_poa_e80911_Figure_3_figure_supplement_2.ai
- elife_poa_e80911_Figure_5_figure_supplement_1.ai
- elife_poa_e80911_Figure_5_figure_supplement_2.ai
- elife_poa_e80911_Figure_6_figure_supplement_1.ai
- elife_poa_e80911_Supplementary_file_1.xlsx
- elife_poa_e80911_Supplementary_file_2.xlsx
- elife_poa_e80911_Supplementary_file_3.xlsx
- elife_poa_e80911_Supplementary_file_4.xlsx
- elife_poa_e80911_Supplementary_file_5.xlsx
