# Supplementary material for: Ubiquitination drives COPI priming and Golgi SNARE localization
Source: eLife journal article supplement (doi:10.7554/elife.80911), 2022-07-29
Supplement: supp [file elife-80911-supp-v1.zip › elife_poa_e80911_Supplementary_file_1.xlsx]

## Sheet: Sheet1
Supplementary File 1: Saccharomyces cerevisiae SNAREs used in this study.
SNARE Name	Classification	Localization
Bet1	Qc	Golgi
Gos1	Qb	ER-Golgi
Snc1	R	PM-vesicles
Snc2	R	PM-vesicles
Sec22	R	ER-Golgi
Bos1	Qb	ER-Golgi
SSo1	Qa	PM
Sec20	Qb	ER
Use1	Qc	ER
Sed5	Qa	Golgi
Sft1	Qc	Golgi
Tlg1	Qc	Late Golgi
Pep12	Qa	Golgi-Vacuole
Syn8	Qc	Golgi-Vacuole
Vam3	Qa	Vacuole
Vti1	Qb	Golgi-Vacuole
Nyv1	R	Golgi-Vacuole
