# Supplementary material for: Ubiquitination drives COPI priming and Golgi SNARE localization
Source: eLife journal article supplement (doi:10.7554/elife.80911), 2022-07-29
Supplement: supp [file elife-80911-supp-v1.zip › elife_poa_e80911_Supplementary_file_2.xlsx]

## Sheet: Sheet1
Supplementary File 2: List of strains used in this study.
Name	Genotype	Sources	Additional strains
BY4742	MATα his3 leu2 ura3 lys2	Invitrogen
β'COP WT	MATα his3 leu2 ura3 lys2 sec27Δ::Hygro p315-SEC27	Xu et al., 2017	Additional strains were generated by transforming this strain with different plasmids encoding mNG-tagged SNAREs. Plasmids are listed in the 'Plasmids used in this study' table. Some strains were generated by transforming two plasmids with different selection markers.
β'COP-Δ2-304	MATα his3 leu2 ura3 lys2 sec27Δ::Hygro p315-sec27Δ2-304	Xu et al., 2017	Additional strains were generated by transforming this strain with different plasmids encoding mNG-tagged SNAREs. Plasmids are listed in the 'Plasmids used in this study' table.
β'COP-UBDDoa1	MATα his3 leu2 ura3 lys2 sec27Δ::Hygro p315-DOA1(1-450)-sec27(305-889)	Xu et al., 2017	Additional strains were generated by transforming this strain with different plasmids encoding mNG-tagged SNAREs. Plasmids are listed in the 'Plasmids used in this study' table. Some strains were generated by transforming two plasmids with different selection markers.
β'COP-NZFTab2	MATα his3 leu2 ura3 lys2 sec27Δ::Hygro p315-NZF-sec27(305-899)	Xu et al., 2017	Additional strains were generated by transforming this strain with different plasmids encoding mNG-tagged SNAREs. Plasmids are listed in the 'Plasmids used in this study' table.
Bet1-HTF	MATα his3 leu2 ura3 lys2 BET1::6xHIS-TEV-3xFLAG::ClonNAT	This study
Gos1-HTF	MATα his3 leu2 ura3 lys2 GOS1::UL36*-3xHA::ClonNAT	This study
Snc1-HTF	MATα his3 leu2 ura3 lys2 SNC1::UL36-3xHA::ClonNAT	This study
Art1-HTF	MATα his3 leu2 ura3 lys2 pRS416-pART1-ART1-3xFLAG	This study
SILACα	MATα Δarg4::kanMX6 leu2-3,112 ura3-52 his3-Δ200 trp1-Δ901 suc2-Δ9 lys2-801	Lee et al., 2017
SILAC-Gos1-HTF	MATa Δarg4::kanMX6 leu2-3,112 ura3-52 his3-Δ200 trp1-Δ901 suc2-Δ9 lys2-801 GOS1::6xHIS-TEV-3xFLAG::ClonNAT	This study
α-COP-DUB	MATα his3 leu2 ura3 lys2 SEC27::UL36-3xHA::ClonNAT	This study
α-COP-DUB*	MATα his3 leu2 ura3 lys2 SEC27::UL36*-3xHA::ClonNAT	This study
β'-COP-DUB	MATα his3 leu2 ura3 lys2 COP1::UL36-3xHA::ClonNAT	This study
β'-COP-DUB*	MATα his3 leu2 ura3 lys2 COP1::UL36*-3xHA::ClonNAT	This study
3xHA Ykt6	MATα his3 leu2 ura3 lys2 ::ClonNAT-TEF-3xHA::YKT6	This study
3xHA Sed5	MATα his3 leu2 ura3 lys2 ::ClonNAT-TEF-3xHA::SED5	This study
α-COP-HTF	MATα his3 leu2 ura3 lys2 SEC27::6xHIS-TEV-3xFLAG::ClonNAT	This study
β'-COP-HTF	MATα his3 leu2 ura3 lys2 COP1::6xHIS-TEV-3xFLAG::ClonNAT	This study
Glo3-HTF	MATα his3 leu2 ura3 lys2 GLO3::6xHIS-TEV-3xFLAG::ClonNAT	This study
EGY101-16d	MATa ret1-1 leu2-3,112 ura3-52 his3-∆200 trp1-∆901 suc2-∆9	(Gaynor and Emr, 1997)
PXY51	MATα his3 leu2 ura3 lys2 sec27Δ::Hygro p416-SEC27	Xu et al., 2017
Chs5-mKate	MATα his3 leu2 ura3 lys2 CHS5::mKate:: KanMX	This study
Sec7-mKate	MATα his3 leu2 ura3 lys2 SEC7::mKate:: KanMX	This study
Mnn9-mKate	MATα his3 leu2 ura3 lys2 MNN9::mKate:: KanMX	This study
Anp1-mKate	MATα his3 leu2 ura3 lys2 ANP1::mKate:: KanMX	This study
