# Supplementary material for: Ubiquitination drives COPI priming and Golgi SNARE localization
Source: eLife journal article supplement (doi:10.7554/elife.80911), 2022-07-29
Supplement: supp [file elife-80911-supp-v1.zip › elife_poa_e80911_Supplementary_file_3.xlsx]

## Sheet: Sheet1
Supplementary File 3: List of plasmids used in this study.
Name	Plasmids	Description	Sources
Vector	pRS416	Yeast shuttle vector	ATCC
β’-COP WT	pRS315-SEC27	SEC27 (b'-COP) whole coding cassette including its promoter and terminator	Xu et al., 2017
β’-COP Δ2-304	pRS315-sec27Δ2-304	SEC27 with deletion the N-terminal b-propeller	Xu et al., 2017
ADH-mNG-Bet1	pRS416-ADH-mNG-Bet1	mNG tagged Bet1 under ADH promoter	This study
mNG-Bet1	pRS416-Cup1-mNG-Bet1	mNG tagged SNARE under CUP1 promoter	This study
mNG-Gos1	pRS416-Cup1-mNG-Gos1	mNG tagged SNARE under CUP1 promoter	This study
mNG-Snc2	pRS416-Cup1-mNG-Snc2	mNG tagged SNARE under CUP1 promoter	This study
mNG-Snc1	pRS416-Cup1-mNG-Snc1	mNG tagged SNARE under CUP1 promoter	This study
mNG-Sec22	pRS416-Cup1-mNG-Sec22	mNG tagged SNARE under CUP1 promoter	This study
mNG-Bos1	pRS416-Cup1-mNG-Bos1	mNG tagged SNARE under CUP1 promoter	This study
mNG-SSo1	pRS416-Cup1-mNG-SSo1	mNG tagged SNARE under CUP1 promoter	This study
mNG-Sec20	pRS416-Cup1-mNG-Sec20	mNG tagged SNARE under CUP1 promoter	This study
mNG-Use1	pRS416-Cup1-mNG-Use1	mNG tagged SNARE under CUP1 promoter	This study
mNG-Sed5	pRS416-Cup1-mNG-Sed5	mNG tagged SNARE under CUP1 promoter	This study
mNG-Sft1	pRS416-Cup1-mNG-Sft1	mNG tagged SNARE under CUP1 promoter	This study
mNG-Tlg1	pRS416-Cup1-mNG-Tlg1	mNG tagged SNARE under CUP1 promoter	This study
mNG-Pep12	pRS416-Cup1-mNG-Pep12	mNG tagged SNARE under CUP1 promoter	This study
mNG-Syn8	pRS416-Cup1-mNG-Syn8	mNG tagged SNARE under CUP1 promoter	This study
mNG-Vam3	pRS416-Cup1-mNG-Vam3	mNG tagged SNARE under CUP1 promoter	This study
mNG-Vti1	pRS416-Cup1-mNG-Vti1	mNG tagged SNARE under CUP1 promoter	This study
mNG-Nyv1	pRS416-Cup1-mNG-Nyv1	mNG tagged SNARE under CUP1 promoter	This study
mScl-Sed5	pRS315-ADH-mScl-Sed5	mNG tagged SNARE under CUP1 promoter	This study
mScl-Aur1	pRS315-ADH-mScl-Aur1	mNG tagged SNARE under CUP1 promoter	This study
mScl-Sec7	pRS315-ADH-mScl-Sec7	mNG tagged SNARE under CUP1 promoter	This study
β'-COP UBDDoa1	pRS315-Doa1(1-450)-Sec27(305-889)	SEC27 first b-propeller replaced with DOA1(1-450)	Xu et al., 2017
β'-COP NZFTab2	pRS315-NZF-Sec27(305-899)	SEC27 first b-propeller replaced with NZF (TAB2 aa 665-693)	Xu et al., 2017
human beta-Propeller-GST	pCOPB1(1-604)-GST	human b'-COP N-terminal propeller tagged with GST	Xu et al., 2017
