# Supplementary material for: Ubiquitination drives COPI priming and Golgi SNARE localization
Source: eLife journal article supplement (doi:10.7554/elife.80911), 2022-07-29
Supplement: supp [file elife-80911-supp-v1.zip › elife_poa_e80911_Supplementary_file_4.xlsx]

## Sheet: Sheet1
Supplementary File 4: SILAC top 50 hits based on normalized H/L ratio for Gos1
Majority protein IDs	Log2 Ratio H/L normalized
sp|P38736|GOSR1_YEAST	-4.906
sp|P43682|SFT1_YEAST	-3.97068
sp|P40509|COPE_YEAST	-3.49365
sp|P32602|SEC17_YEAST	-3.33742
sp|Q01590|SED5_YEAST	-2.82501
sp|P22213|SLY1_YEAST	-2.71151
sp|Q03532|HAS1_YEAST	-2.62941
sp|P00359|G3P3_YEAST	-1.97574
sp|P00358|G3P2_YEAST	-1.81975
sp|P07253|CBP6_YEAST	-1.7269
sp|P05318|RLA1_YEAST	-1.69283
sp|P32582|CBS_YEAST	-1.6514
sp|P53622|COPA_YEAST	-1.64968
sp|P40008|FMP52_YEAST	-1.59392
sp|P22354|RM20_YEAST	-1.57841
sp|P22353|RM08_YEAST	-1.55152
sp|P41810|COPB_YEAST	-1.45708
sp|P41811|COPB2_YEAST	-1.45225
sp|P38701|RS20_YEAST	-1.39176
sp|P0CX54|RL12B_YEAST	-1.35229
sp|P41940|MPG1_YEAST	-1.32225
sp|P28241|IDH2_YEAST	-1.23912
sp|P36015|YKT6_YEAST	-1.11691
sp|P39990|SNU13_YEAST	-1.01441
sp|P00950|PMG1_YEAST	-0.999798
sp|P32316|ACH1_YEAST	-0.967448
sp|P12695|ODP2_YEAST	-0.9069
sp|Q3E7X9|RS28A_YEAST	-0.892044
sp|P54115|ALDH6_YEAST	-0.841741
sp|P43588|RPN11_YEAST	-0.828358
sp|Q3E7Y3|RS22B_YEAST	-0.818757
sp|P00330|ADH1_YEAST	-0.810865
sp|P00549|KPYK1_YEAST	-0.807099
sp|P15180|SYKC_YEAST	-0.805509
sp|P19882|HSP60_YEAST	-0.792132
sp|P12686|RT13_YEAST	-0.791583
sp|P0CS90|HSP77_YEAST	-0.771988
sp|P14540|ALF_YEAST	-0.754115
sp|P0CX42|RL23B_YEAST	-0.710354
sp|P07991|OAT_YEAST	-0.708703
sp|P0CX52|RS16B_YEAST	-0.70106
sp|P25694|CDC48_YEAST	-0.686081
sp|P33299|PRS7_YEAST	-0.682789
sp|P39954|SAHH_YEAST	-0.681353
sp|P05317|RLA0_YEAST	-0.675143
sp|P26783|RS5_YEAST	-0.674982
sp|Q03940|RUVB1_YEAST	-0.672451
sp|P07703|RPAC1_YEAST	-0.666599
sp|P25605|ILV6_YEAST	-0.639063
