# Supplementary material for: Ubiquitination drives COPI priming and Golgi SNARE localization
Source: eLife journal article supplement (doi:10.7554/elife.80911), 2022-07-29
Supplement: supp [file elife-80911-supp-v1.zip › elife_poa_e80911_Supplementary_file_5.xlsx]

## Sheet: Sheet1
Supplementary File 5: SILAC top 50 hits based on normalized H/L ratio for αCOP
Majority protein IDs	Log2 Ratio H/L normalized
sp|P41811|COPB2_YEAST	-5.76047
sp|P43621|COPD_YEAST	-5.33235
sp|P41810|COPB_YEAST	-5.03415
sp|P40509|COPE_YEAST	-5.00546
sp|P32074|COPG_YEAST	-3.55028
sp|P53221|RL26B_YEAST	-3.39005
sp|P38286|MKAR_YEAST	-2.91713
sp|P39727|ERV46_YEAST	-2.83547
sp|P32353|ERG3_YEAST	-2.81472
sp|P53600|COPZ_YEAST	-2.48892
sp|P53622|COPA_YEAST	-2.46419
sp|P47154|STE24_YEAST	-2.2111
sp|Q04651|ERV41_YEAST	-2.06836
sp|P10622|RLA3_YEAST	-2.03925
sp|P05375|PLMT_YEAST	-2.00012
sp|P38682|GLO3_YEAST	-1.883
sp|P43573|BUD27_YEAST	-1.79852
sp|P53045|MSMO_YEAST	-1.61057
sp|Q03529|SCS7_YEAST	-1.59014
sp|P35191|MDJ1_YEAST	-1.55499
sp|P00358|G3P2_YEAST	-1.36438
sp|P32497|EIF3C_YEAST	-1.30754
sp|P27476|NSR1_YEAST	-1.30725
sp|P00359|G3P3_YEAST	-1.21317
sp|P39938|RS26A_YEAST	-1.20699
sp|P38701|RS20_YEAST	-1.14051
sp|P38065|AP2A_YEAST	-1.13809
sp|P27895|CIN8_YEAST	-1.10479
sp|Q04697|GSF2_YEAST	-1.05919
sp|P29496|MCM5_YEAST	-1.01092
sp|P32368|SAC1_YEAST	-1.00729
sp|P32342|SRP21_YEAST	-0.972535
sp|Q12324|YVC1_YEAST	-0.966517
sp|P38689|KPR3_YEAST	-0.958981
sp|P38431|IF5_YEAST	-0.957188
sp|P38325|OM14_YEAST	-0.936111
sp|P41940|MPG1_YEAST	-0.914983
sp|P40961|PHB1_YEAST	-0.895127
sp|P06197|PIS_YEAST	-0.882172
sp|P04710|ADT1_YEAST	-0.877526
sp|P16862|PFKA2_YEAST	-0.871971
sp|P32481|IF2G_YEAST	-0.858829
sp|P38249|EIF3A_YEAST	-0.844406
sp|P08536|MET3_YEAST	-0.826617
sp|P46784|RS10B_YEAST	-0.818503
sp|Q3E7Y3|RS22B_YEAST	-0.80035
sp|P28241|IDH2_YEAST	-0.798115
sp|P17076|RL8A_YEAST	-0.797714
sp|P25515|VATL1_YEAST	-0.794107
